# Supplementary material for: Deepening the Whole Transcriptomics of Bovine Liver Cells Exposed to AFB1: A Spotlight on Toll-like Receptor 2
Source: Toxins (Basel). 2022 Jul 20;14(7):504. doi: 10.3390/toxins14070504 (PMC9323327; doi:10.3390/toxins14070504)
Supplement: Supplementary file 1 [file toxins-14-00504-s001.zip]

Archive with 6 entries (6 files):
- Table S1.xlsx
- Table S2.xlsx
- Table S3.xlsx
- Table S4.xlsx
- Table S5.xlsx
- toxins-1806326-supplementary ms.pdf
