# Supplementary material for: Deepening the Whole Transcriptomics of Bovine Liver Cells Exposed to AFB1: A Spotlight on Toll-like Receptor 2
Source: Toxins (Basel). 2022 Jul 20;14(7):504. doi: 10.3390/toxins14070504 (PMC9323327; doi:10.3390/toxins14070504)
Supplement: Supplementary file 1 [file toxins-14-00504-s001.zip › Table S1.xlsx]

## Sheet: Table S1
Results of RNA sequencing, filtering and mapping. The table reports, for each library, the number of raw reads obtained through sequencing, the number of reads after trimming processes, the number of mapped reads against Bos taururs genome and the relative percentage.
Sample_ID	N° Raw Reads	N° Reads After Trimming	N° Mapped Reads	% Mapped Reads
CTRL_1	21697352	21697352	21526696	99.22
CTRL_2	19963970	19963970	19816775	99.26
CTRL_3	20685694	20685694	20537490	99.28
CTRL_4	22310281	22310281	22144198	99.27
AF0.9_1	25194884	25194884	25015254	99.27
AF0.9_2	25509236	25509236	25312613	99.23
AF0.9_3	22330618	22330618	22159451	99.24
AF0.9_4	23056686	23056686	22886529	99.26
AF1.8_1	25001057	25001057	24806030	99.22
AF1.8_2	26118873	26118873	25916435	99.22
AF1.8_3	30344256	30344256	30124572	99.28
AF1.8_4	22326606	22326606	22163486	99.26
AF3.6_1	24317397	24317397	24128340	99.21
AF3.6_2	22851565	22851565	22665748	99.19
AF3.6_3	25330092	25330092	25016785	98.77
AF3.6_4	23244032	23244032	23062334	99.22
