# Supplementary material for: Deepening the Whole Transcriptomics of Bovine Liver Cells Exposed to AFB1: A Spotlight on Toll-like Receptor 2
Source: Toxins (Basel). 2022 Jul 20;14(7):504. doi: 10.3390/toxins14070504 (PMC9323327; doi:10.3390/toxins14070504)
Supplement: Supplementary file 1 [file toxins-14-00504-s001.zip › Table S2.xlsx]

## Sheet: AFB1 0.9 µM vs CTRL
ENSEMBL	ENTREZID	Gene description	Gene name	logFC	unshrunk.logFC	logCPM	PValue	FDR
ENSBTAG00000018189	514170	cystatin B (stefin B) [Source:NCBI gene (formerly Entrezgene);Acc:514170]	CSTB	2.46535	2.46642	5.98737	6.33e-14	7.98e-10
ENSBTAG00000011644	540939	Bos taurus thrombospondin type 1 domain containing 4 (THSD4), mRNA. [Source:RefSeq mRNA;Acc:NM_001078030]	THSD4	-3.43952	-3.44198	3.58345	1.75e-13	7.98e-10
ENSBTAG00000040490	509875	coiled-coil domain containing 3 [Source:NCBI gene (formerly Entrezgene);Acc:509875]	CCDC3	-2.01364	-2.01377	6.74687	1.86e-13	7.98e-10
ENSBTAG00000002974	504401	flavin containing dimethylaniline monoxygenase 2 [Source:VGNC Symbol;Acc:VGNC:29050]	FMO2	-3.16693	-3.16878	3.73085	2.45e-13	7.98e-10
ENSBTAG00000054218	404185	insulin like growth factor binding protein 5 [Source:NCBI gene (formerly Entrezgene);Acc:404185]	IGFBP5	-3.47075	-3.47614	2.47721	9.73e-13	2.54e-09
ENSBTAG00000031669	527492	catenin alpha 2 [Source:NCBI gene (formerly Entrezgene);Acc:527492]	CTNNA2	-3.44381	-3.45016	2.2337	2.53e-12	4.87e-09
ENSBTAG00000007732	618648	cAMP regulated phosphoprotein 21 [Source:VGNC Symbol;Acc:VGNC:58588]	ARPP21	2.8492	2.85326	4.58472	2.62e-12	4.87e-09
ENSBTAG00000011734	510376	ankyrin repeat domain 1 [Source:VGNC Symbol;Acc:VGNC:25908]	ANKRD1	2.40885	2.40894	9.27907	3.99e-12	6.49e-09
ENSBTAG00000006367	281103	cellular communication network factor 2 [Source:VGNC Symbol;Acc:VGNC:27794]	CCN2	2.28195	2.28202	9.11781	6.85e-12	9.91e-09
ENSBTAG00000001764	523701	neurocan [Source:VGNC Symbol;Acc:VGNC:31900]	NCAN	4.0273	4.04546	3.76305	8.79e-12	1.15e-08
ENSBTAG00000020829	509657	protein tyrosine phosphatase receptor type K [Source:VGNC Symbol;Acc:VGNC:33552]	PTPRK	-2.03801	-2.03834	5.11182	1.41e-11	1.67e-08
ENSBTAG00000004587	515310	dual specificity phosphatase 6 [Source:VGNC Symbol;Acc:VGNC:28262]	DUSP6	2.25465	2.25531	6.337	1.59e-11	1.73e-08
ENSBTAG00000000585	505805	lymphocyte antigen 6 family member G6C [Source:VGNC Symbol;Acc:VGNC:31090]	LY6G6C	3.04626	3.05053	4.92959	2.44e-11	2.44e-08
ENSBTAG00000006194	531389	FOS like 1, AP-1 transcription factor subunit [Source:VGNC Symbol;Acc:VGNC:29075]	FOSL1	2.83955	2.84255	5.52878	2.66e-11	2.48e-08
ENSBTAG00000021435	617914	MAF bZIP transcription factor F [Source:VGNC Symbol;Acc:VGNC:31140]	MAFF	1.92631	1.92731	5.7848	4.57e-11	3.97e-08
ENSBTAG00000009844	508941	cellular communication network factor 1 [Source:VGNC Symbol;Acc:VGNC:50270]	CCN1	2.03362	2.03368	9.27463	5.41e-11	4.41e-08
ENSBTAG00000010462	534842	roundabout guidance receptor 2 [Source:VGNC Symbol;Acc:VGNC:34079]	ROBO2	-2.44723	-2.44811	4.14977	7.05e-11	5.11e-08
ENSBTAG00000005800	529618	glutamate ionotropic receptor AMPA type subunit 1 [Source:VGNC Symbol;Acc:VGNC:29638]	GRIA1	-2.63439	-2.63593	3.55946	7.25e-11	5.11e-08
ENSBTAG00000002006	281530	thrombospondin 1 [Source:VGNC Symbol;Acc:VGNC:35828]	THBS1	2.21438	2.21443	10.2777	7.45e-11	5.11e-08
ENSBTAG00000002127	541012	t-complex 11 like 2 [Source:VGNC Symbol;Acc:VGNC:35704]	TCP11L2	-2.30972	-2.3121	2.68204	7.92e-11	5.16e-08
ENSBTAG00000021971	540156	synuclein alpha interacting protein [Source:VGNC Symbol;Acc:VGNC:35060]	SNCAIP	-2.66212	-2.66813	1.52719	1.45e-10	9e-08
ENSBTAG00000008333	533129	ETS variant transcription factor 4 [Source:VGNC Symbol;Acc:VGNC:28630]	ETV4	3.31002	3.31822	4.3078	1.53e-10	9.04e-08
ENSBTAG00000019866	539369	neuropilin 1 [Source:VGNC Symbol;Acc:VGNC:32266]	NRP1	1.69284	1.69327	5.98535	2.28e-10	1.25e-07
ENSBTAG00000011578	281057	CD44 molecule [Source:VGNC Symbol;Acc:VGNC:54629]	CD44	1.55325	1.55328	9.96832	2.3e-10	1.25e-07
ENSBTAG00000018347	507054	interleukin 33 [Source:VGNC Symbol;Acc:VGNC:30155]	IL33	-2.84054	-2.84438	2.37727	2.8e-10	1.43e-07
ENSBTAG00000039340	538100	sodium voltage-gated channel beta subunit 4 [Source:VGNC Symbol;Acc:VGNC:34351]	SCN4B	-2.63299	-2.63511	3.19287	2.86e-10	1.43e-07
ENSBTAG00000001231	281996	cadherin related family member 1 [Source:VGNC Symbol;Acc:VGNC:27108]	CDHR1	4.29235	4.34852	3.54011	3.17e-10	1.53e-07
ENSBTAG00000013369	781493	collagen type XIV alpha 1 chain [Source:VGNC Symbol;Acc:VGNC:53851]	COL14A1	-1.42616	-1.42618	8.36377	3.37e-10	1.57e-07
ENSBTAG00000016819	281758	fatty acid binding protein 3 [Source:VGNC Symbol;Acc:VGNC:28697]	FABP3	2.11654	2.11742	5.98383	4.55e-10	2.05e-07
ENSBTAG00000014112	537690	exocyst complex component 4 [Source:VGNC Symbol;Acc:VGNC:28648]	EXOC4	-1.58439	-1.58466	4.96783	4.91e-10	2.11e-07
ENSBTAG00000013165	532663	ectonucleotide pyrophosphatase/phosphodiesterase 2 [Source:VGNC Symbol;Acc:VGNC:28505]	ENPP2	-2.02803	-2.02895	3.71389	5.03e-10	2.11e-07
ENSBTAG00000024081	533916	extracellular matrix protein 2 [Source:VGNC Symbol;Acc:VGNC:28312]	ECM2	-1.60776	-1.60791	5.90227	6.06e-10	2.47e-07
ENSBTAG00000013525	617577	megakaryocyte and platelet inhibitory receptor G6b [Source:VGNC Symbol;Acc:VGNC:31577]	MPIG6B	1.86973	1.87192	4.15069	6.32e-10	2.49e-07
ENSBTAG00000007241	507627	SLAM family member 9 [Source:VGNC Symbol;Acc:VGNC:34657]	SLAMF9	3.26024	3.26667	3.65639	6.49e-10	2.49e-07
ENSBTAG00000031178	535743	solute carrier family 9 member A9 [Source:VGNC Symbol;Acc:VGNC:34947]	SLC9A9	-4.55533	-4.5962	0.680976	7.02e-10	2.61e-07
ENSBTAG00000013760	523526	collagen type IV alpha 6 chain [Source:VGNC Symbol;Acc:VGNC:27567]	COL4A6	-1.78768	-1.7878	6.31612	8.74e-10	3.16e-07
ENSBTAG00000024269	784894	transforming growth factor beta receptor 3 [Source:VGNC Symbol;Acc:VGNC:49979]	TGFBR3	-1.55911	-1.5593	5.49086	1.21e-09	4.27e-07
ENSBTAG00000005236	281665	cholecystokinin B receptor [Source:VGNC Symbol;Acc:VGNC:26942]	CCKBR	4.45201	4.50345	3.03046	1.66e-09	5.7e-07
ENSBTAG00000053833	#N/A	0	0	-2.33256	-2.33548	2.27827	1.85e-09	6.16e-07
ENSBTAG00000039425	614456	keratin 6A [Source:NCBI gene (formerly Entrezgene);Acc:614456]	KRT6A	3.42071	3.42819	5.17456	1.97e-09	6.41e-07
ENSBTAG00000044033	538062	EGF like repeats and discoidin domains 3 [Source:VGNC Symbol;Acc:VGNC:28326]	EDIL3	-2.18657	-2.1875	3.79793	2.02e-09	6.41e-07
ENSBTAG00000051466	100336480	unc-51 like kinase 4 [Source:NCBI gene (formerly Entrezgene);Acc:100336480]	ULK4	-1.72734	-1.72874	2.84402	2.5e-09	7.74e-07
ENSBTAG00000010178	532751	protein tyrosine phosphatase receptor type D [Source:VGNC Symbol;Acc:VGNC:33548]	PTPRD	-2.37793	-2.38141	2.11483	2.58e-09	7.82e-07
ENSBTAG00000013918	282651	adhesion G protein-coupled receptor L3 [Source:VGNC Symbol;Acc:VGNC:53686]	ADGRL3	-2.56623	-2.57199	1.56901	2.7e-09	8.01e-07
ENSBTAG00000048246	281122	dipeptidyl peptidase 4 [Source:NCBI gene (formerly Entrezgene);Acc:281122]	DPP4	-3.9094	-3.9356	0.693121	3.11e-09	9e-07
ENSBTAG00000026181	286792	UDP glucuronosyltransferase 1 family, polypeptide A6 [Source:NCBI gene (formerly Entrezgene);Acc:286792]	UGT1A1	-4.06009	-4.13501	-0.566601	3.53e-09	9.99e-07
ENSBTAG00000004398	101902373	inner mitochondrial membrane peptidase subunit 2 [Source:VGNC Symbol;Acc:VGNC:57350]	IMMP2L	-1.70187	-1.70328	2.7284	3.69e-09	1.02e-06
ENSBTAG00000010661	509796	dihydropyrimidinase like 3 [Source:VGNC Symbol;Acc:VGNC:28196]	DPYSL3	1.44994	1.45	8.33263	3.74e-09	1.02e-06
ENSBTAG00000000559	505640	phospholipid transfer protein [Source:VGNC Symbol;Acc:VGNC:33055]	PLTP	3.53915	3.53969	8.2345	3.99e-09	1.04e-06
ENSBTAG00000001132	534677	glycosyltransferase like domain containing 1 [Source:VGNC Symbol;Acc:VGNC:29690]	GTDC1	-2.37895	-2.38145	2.55675	4.04e-09	1.04e-06
ENSBTAG00000019612	616089	ribonuclease A family member 4 [Source:VGNC Symbol;Acc:VGNC:33998]	RNASE4	-1.59947	-1.59968	5.46618	4.09e-09	1.04e-06
ENSBTAG00000019722	282244	guanylate cyclase 2C [Source:VGNC Symbol;Acc:VGNC:29722]	GUCY2C	-1.52407	-1.52479	3.48251	4.2e-09	1.04e-06
ENSBTAG00000008103	281615	aldehyde dehydrogenase 1 family member A1 [Source:VGNC Symbol;Acc:VGNC:25808]	ALDH1A1	-1.9961	-1.99706	3.69356	4.25e-09	1.04e-06
ENSBTAG00000051780	100297737	ribonuclease A family member 12 (inactive) [Source:NCBI gene (formerly Entrezgene);Acc:100297737]	RNASE12	-2.61798	-2.62856	0.65321	5.05e-09	1.22e-06
ENSBTAG00000011962	527631	phospholipase A2 group III [Source:VGNC Symbol;Acc:VGNC:32959]	PLA2G3	2.47554	2.48391	2.94464	5.76e-09	1.34e-06
ENSBTAG00000051298	526865	PVR cell adhesion molecule [Source:NCBI gene (formerly Entrezgene);Acc:526865]	PVR	1.70213	1.70225	8.01211	5.77e-09	1.34e-06
ENSBTAG00000013779	540050	heat shock protein family A (Hsp70) member 12A [Source:VGNC Symbol;Acc:VGNC:55956]	HSPA12A	1.24523	1.24545	6.05376	5.95e-09	1.36e-06
ENSBTAG00000031358	281124	dihydropyrimidine dehydrogenase [Source:VGNC Symbol;Acc:VGNC:28193]	DPYD	-2.90765	-2.9134	1.87271	6.7e-09	1.5e-06
ENSBTAG00000054574	518080	multidrug resistance-associated protein 1 [Source:NCBI gene (formerly Entrezgene);Acc:518080]	0	3.80588	3.82812	3.53312	6.78e-09	1.5e-06
ENSBTAG00000023179	521857	tribbles pseudokinase 1 [Source:VGNC Symbol;Acc:VGNC:36308]	TRIB1	2.08785	2.08844	6.28134	7.02e-09	1.52e-06
ENSBTAG00000007104	781073	junctophilin 4 [Source:VGNC Symbol;Acc:VGNC:30383]	JPH4	-2.23332	-2.23905	1.407	7.11e-09	1.52e-06
ENSBTAG00000006528	535387	Bardet-Biedl syndrome 9 [Source:NCBI gene (formerly Entrezgene);Acc:535387]	BBS9	-2.13462	-2.13815	1.87622	7.6e-09	1.6e-06
ENSBTAG00000012312	783965	receptor tyrosine kinase like orphan receptor 1 [Source:VGNC Symbol;Acc:VGNC:55673]	ROR1	-1.86819	-1.86871	4.36385	7.78e-09	1.61e-06
ENSBTAG00000008951	280994	alkaline phosphatase, biomineralization associated [Source:VGNC Symbol;Acc:VGNC:25850]	ALPL	3.66182	3.67566	3.47073	8.24e-09	1.67e-06
ENSBTAG00000015692	506096	heat shock protein family A (Hsp70) member 4 like [Source:VGNC Symbol;Acc:VGNC:53906]	HSPA4L	1.41773	1.41808	5.92682	8.31e-09	1.67e-06
ENSBTAG00000013147	528842	neurofilament heavy [Source:VGNC Symbol;Acc:VGNC:31985]	NEFH	2.47771	2.48251	4.38906	8.67e-09	1.71e-06
ENSBTAG00000001537	529661	tsukushi, small leucine rich proteoglycan [Source:VGNC Symbol;Acc:VGNC:54896]	TSKU	2.0119	2.01313	4.96857	1.03e-08	2e-06
ENSBTAG00000010293	535378	par-3 family cell polarity regulator beta [Source:NCBI gene (formerly Entrezgene);Acc:535378]	PARD3B	-2.07316	-2.07487	2.78383	1.09e-08	2.09e-06
ENSBTAG00000047416	510736	hephaestin [Source:VGNC Symbol;Acc:VGNC:29812]	HEPH	-1.21	-1.21025	4.75587	1.52e-08	2.86e-06
ENSBTAG00000003977	507459	solute carrier family 52 member 3 [Source:VGNC Symbol;Acc:VGNC:34902]	SLC52A3	-3.14824	-3.16237	0.760861	1.56e-08	2.86e-06
ENSBTAG00000016229	539139	Kruppel like factor 9 [Source:VGNC Symbol;Acc:VGNC:30632]	KLF9	-1.37166	-1.37215	4.03309	1.56e-08	2.86e-06
ENSBTAG00000003894	515033	NDRG family member 4 [Source:VGNC Symbol;Acc:VGNC:31941]	NDRG4	2.563	2.58018	2.14498	1.6e-08	2.9e-06
ENSBTAG00000000310	281908	microfibril associated protein 5 [Source:VGNC Symbol;Acc:VGNC:31425]	MFAP5	2.76178	2.78221	2.15786	1.74e-08	3.1e-06
ENSBTAG00000012737	788507	G protein-coupled receptor 65 [Source:VGNC Symbol;Acc:VGNC:29596]	GPR65	2.21521	2.22206	2.96828	1.85e-08	3.26e-06
ENSBTAG00000006870	514877	RasGEF domain family member 1A [Source:VGNC Symbol;Acc:VGNC:33743]	RASGEF1A	4.07536	4.11272	2.67247	2.07e-08	3.59e-06
ENSBTAG00000010726	100271720	coagulation factor VIII [Source:VGNC Symbol;Acc:VGNC:28690]	F8	-1.73997	-1.74089	3.39307	2.28e-08	3.91e-06
ENSBTAG00000021717	538896	bradykinin receptor B2 [Source:VGNC Symbol;Acc:VGNC:26460]	BDKRB2	1.38638	1.38673	5.70704	2.39e-08	3.98e-06
ENSBTAG00000048655	281363	5'-nucleotidase ecto [Source:NCBI gene (formerly Entrezgene);Acc:281363]	NT5E	-1.94053	-1.94092	4.75979	2.4e-08	3.98e-06
ENSBTAG00000026371	518366	sorting nexin 29 [Source:VGNC Symbol;Acc:VGNC:35106]	SNX29	-1.71384	-1.71495	3.04539	2.44e-08	3.98e-06
ENSBTAG00000008134	617701	brain derived neurotrophic factor [Source:VGNC Symbol;Acc:VGNC:26461]	BDNF	1.70257	1.70584	3.1188	2.45e-08	3.98e-06
ENSBTAG00000005738	541187	ATPase phospholipid transporting 8B1 [Source:VGNC Symbol;Acc:VGNC:26330]	ATP8B1	1.09916	1.09932	6.13038	2.52e-08	4.06e-06
ENSBTAG00000030581	614554	TBC1 domain family member 5 [Source:VGNC Symbol;Acc:VGNC:53608]	TBC1D5	-1.30419	-1.30459	4.05778	2.6e-08	4.13e-06
ENSBTAG00000005667	#N/A	0	0	3.50778	3.5618	0.89133	2.71e-08	4.18e-06
ENSBTAG00000021739	508734	natriuretic peptide B [Source:VGNC Symbol;Acc:VGNC:32211]	NPPB	3.91404	3.95675	2.16839	2.71e-08	4.18e-06
ENSBTAG00000021132	101905578	synaptopodin 2 like [Source:VGNC Symbol;Acc:VGNC:54495]	SYNPO2L	2.09836	2.10406	2.82397	2.73e-08	4.18e-06
ENSBTAG00000000987	506301	otogelin [Source:VGNC Symbol;Acc:VGNC:32485]	OTOG	3.06649	3.0732	3.17823	2.76e-08	4.19e-06
ENSBTAG00000011207	534583	calponin 1 [Source:VGNC Symbol;Acc:VGNC:27508]	CNN1	2.03484	2.03508	6.90059	3.27e-08	4.89e-06
ENSBTAG00000034885	614348	regulator of cell cycle [Source:VGNC Symbol;Acc:VGNC:33902]	RGCC	2.08936	2.09472	3.02014	3.59e-08	5.31e-06
ENSBTAG00000023730	768070	tubulin beta 3 class III [Source:NCBI gene (formerly Entrezgene);Acc:768070]	TUBB3	2.50466	2.50921	3.61551	3.87e-08	5.66e-06
ENSBTAG00000008096	281137	endothelin 1 [Source:VGNC Symbol;Acc:VGNC:28327]	EDN1	1.42819	1.42863	5.44093	4.04e-08	5.85e-06
ENSBTAG00000006273	618738	sulfotransferase family 4A member 1 [Source:VGNC Symbol;Acc:VGNC:35469]	SULT4A1	1.61212	1.61416	3.21352	4.36e-08	6.24e-06
ENSBTAG00000016729	781505	potassium sodium-activated channel subfamily T member 2 [Source:VGNC Symbol;Acc:VGNC:30495]	KCNT2	-1.88042	-1.8833	1.82348	4.41e-08	6.25e-06
ENSBTAG00000016800	518458	semaphorin 6D [Source:VGNC Symbol;Acc:VGNC:34444]	SEMA6D	-2.84621	-2.86474	0.126959	4.55e-08	6.38e-06
ENSBTAG00000011154	529759	syndecan 1 [Source:VGNC Symbol;Acc:VGNC:34378]	SDC1	1.25608	1.2562	6.78715	4.71e-08	6.53e-06
ENSBTAG00000009851	536815	roundabout guidance receptor 1 [Source:VGNC Symbol;Acc:VGNC:34078]	ROBO1	-1.56616	-1.56648	4.80147	4.86e-08	6.66e-06
ENSBTAG00000019093	505049	amylase, alpha 2B (pancreatic) [Source:NCBI gene (formerly Entrezgene);Acc:505049]	AMY2B	-2.26021	-2.26479	1.58882	5.03e-08	6.83e-06
ENSBTAG00000022360	533829	SRY-box transcription factor 5 [Source:VGNC Symbol;Acc:VGNC:35149]	SOX5	-1.99534	-1.99762	2.30086	5.23e-08	7.02e-06
ENSBTAG00000017571	532887	pleckstrin homology domain containing A5 [Source:VGNC Symbol;Acc:VGNC:33007]	PLEKHA5	-1.44579	-1.44646	3.71019	5.31e-08	7.05e-06
ENSBTAG00000016206	281293	monoamine oxidase A [Source:VGNC Symbol;Acc:VGNC:31174]	MAOA	-1.22932	-1.22942	6.12948	5.91e-08	7.78e-06
ENSBTAG00000020636	#N/A	synapsin III [Source:VGNC Symbol;Acc:VGNC:35516]	SYN3	-3.53555	-3.56451	0.190812	6.3e-08	8.2e-06
ENSBTAG00000002626	100140016	Rho GTPase activating protein 6 [Source:VGNC Symbol;Acc:VGNC:26099]	ARHGAP6	-2.06326	-2.07398	0.24412	6.47e-08	8.35e-06
ENSBTAG00000030974	777775	tubulin alpha 4a [Source:VGNC Symbol;Acc:VGNC:49986]	TUBA4A	1.42149	1.42178	5.79975	6.93e-08	8.8e-06
ENSBTAG00000008688	538609	hes related family bHLH transcription factor with YRPW motif like [Source:VGNC Symbol;Acc:VGNC:29830]	HEYL	1.73656	1.73799	4.07022	6.96e-08	8.8e-06
ENSBTAG00000017877	507718	nectin cell adhesion molecule 4 [Source:VGNC Symbol;Acc:VGNC:55633]	NECTIN4	2.35818	2.35927	5.39101	7.77e-08	9.74e-06
ENSBTAG00000012082	617439	TNF receptor superfamily member 12A [Source:VGNC Symbol;Acc:VGNC:36162]	TNFRSF12A	1.75516	1.75558	6.19347	7.96e-08	9.87e-06
ENSBTAG00000049215	781091	shisa family member 3 [Source:NCBI gene (formerly Entrezgene);Acc:781091]	SHISA3	3.95182	4.12871	1.19776	8.11e-08	9.95e-06
ENSBTAG00000048508	281867	inhibin subunit beta A [Source:NCBI gene (formerly Entrezgene);Acc:281867]	INHBA	1.78659	1.7875	5.06521	8.24e-08	9.95e-06
ENSBTAG00000038549	509506	phylloquinone omega-hydroxylase CYP4F2 [Source:NCBI gene (formerly Entrezgene);Acc:509506]	0	3.73649	3.77583	2.00582	8.29e-08	9.95e-06
ENSBTAG00000033180	616050	SET and MYND domain containing 3 [Source:VGNC Symbol;Acc:VGNC:35044]	SMYD3	-1.93008	-1.9351	1.29457	8.33e-08	9.95e-06
ENSBTAG00000020148	280939	TEK receptor tyrosine kinase [Source:VGNC Symbol;Acc:VGNC:35735]	TEK	-2.47399	-2.481	1.18073	9.54e-08	1.11e-05
ENSBTAG00000045877	100125309	TSC22 domain family member 3 [Source:NCBI gene (formerly Entrezgene);Acc:100125309]	TSC22D3	-1.0878	-1.08785	7.09851	9.59e-08	1.11e-05
ENSBTAG00000032887	618133	SPT3 homolog, SAGA and STAGA complex component [Source:VGNC Symbol;Acc:VGNC:35479]	SUPT3H	-1.3604	-1.36141	2.89325	9.6e-08	1.11e-05
ENSBTAG00000014821	504220	solute carrier family 7 member 7 [Source:VGNC Symbol;Acc:VGNC:34932]	SLC7A7	-2.12019	-2.12134	3.4339	9.61e-08	1.11e-05
ENSBTAG00000007196	513463	transgelin [Source:VGNC Symbol;Acc:VGNC:35585]	TAGLN	1.88621	1.88624	9.60098	1.1e-07	1.25e-05
ENSBTAG00000018520	529590	sodium voltage-gated channel alpha subunit 1 [Source:VGNC Symbol;Acc:VGNC:34345]	SCN1A	-1.7223	-1.72336	3.09499	1.13e-07	1.27e-05
ENSBTAG00000002940	538627	Wnt family member 16 [Source:VGNC Symbol;Acc:VGNC:36956]	WNT16	-1.96825	-1.96879	4.34275	1.13e-07	1.27e-05
ENSBTAG00000020060	506790	thioredoxin interacting protein [Source:VGNC Symbol;Acc:VGNC:36541]	TXNIP	-1.13863	-1.13865	8.45472	1.22e-07	1.36e-05
ENSBTAG00000045757	509486	troponin C1, slow skeletal and cardiac type [Source:VGNC Symbol;Acc:VGNC:36189]	TNNC1	1.47379	1.47447	4.77218	1.23e-07	1.36e-05
ENSBTAG00000014915	541166	ETS variant transcription factor 5 [Source:VGNC Symbol;Acc:VGNC:28631]	ETV5	1.48695	1.48729	5.63518	1.25e-07	1.37e-05
ENSBTAG00000023177	280816	complement factor H [Source:NCBI gene (formerly Entrezgene);Acc:280816]	CFH	-3.22309	-3.22457	4.14241	1.33e-07	1.44e-05
ENSBTAG00000023843	616166	Ral GEF with PH domain and SH3 binding motif 1 [Source:VGNC Symbol;Acc:VGNC:33704]	RALGPS1	-1.64584	-1.64737	2.57172	1.35e-07	1.45e-05
ENSBTAG00000008008	281534	toll like receptor 2 [Source:VGNC Symbol;Acc:VGNC:49982]	TLR2	1.72228	1.72396	4.61355	1.38e-07	1.47e-05
ENSBTAG00000008779	286820	arachidonate 15-lipoxygenase type B [Source:VGNC Symbol;Acc:VGNC:55769]	ALOX15B	5.78569	5.97082	2.8958	1.57e-07	1.67e-05
ENSBTAG00000050763	537248	2-phosphoxylose phosphatase 1 [Source:VGNC Symbol;Acc:VGNC:52811]	PXYLP1	-1.15889	-1.15915	4.64128	1.63e-07	1.71e-05
ENSBTAG00000016732	534479	dynein axonemal intermediate chain 2 [Source:VGNC Symbol;Acc:VGNC:28130]	DNAI2	3.70436	3.78184	1.16927	1.8e-07	1.87e-05
ENSBTAG00000018773	508869	Rho family GTPase 1 [Source:VGNC Symbol;Acc:VGNC:34004]	RND1	1.38627	1.38769	3.85695	1.86e-07	1.92e-05
ENSBTAG00000020374	541228	thrombospondin type 1 domain containing 1 [Source:VGNC Symbol;Acc:VGNC:35849]	THSD1	1.4129	1.41335	5.54882	1.91e-07	1.96e-05
ENSBTAG00000008550	100125415	GTPase, IMAP family member 7 [Source:NCBI gene (formerly Entrezgene);Acc:100125415]	GIMAP7	1.51999	1.52117	4.0074	1.96e-07	2e-05
ENSBTAG00000000925	523294	glycosyltransferase 8 domain containing 2 [Source:VGNC Symbol;Acc:VGNC:29424]	GLT8D2	-2.4761	-2.48665	0.539867	2e-07	2.02e-05
ENSBTAG00000054330	281555	tubulin, beta 2B class IIb [Source:NCBI gene (formerly Entrezgene);Acc:281555]	TUBB2B	1.88938	1.89024	4.90436	2.04e-07	2.04e-05
ENSBTAG00000032148	614719	transmembrane protein 117 [Source:VGNC Symbol;Acc:VGNC:35954]	TMEM117	-2.34916	-2.35538	1.23149	2.27e-07	2.25e-05
ENSBTAG00000000793	511043	laminin subunit gamma 2 [Source:VGNC Symbol;Acc:VGNC:30774]	LAMC2	1.30473	1.3053	4.82911	2.28e-07	2.25e-05
ENSBTAG00000015794	522383	nestin [Source:VGNC Symbol;Acc:VGNC:32009]	NES	1.14839	1.14846	7.30741	2.44e-07	2.39e-05
ENSBTAG00000004557	282851	dehydrogenase/reductase 9 [Source:VGNC Symbol;Acc:VGNC:28046]	DHRS9	1.64214	1.64286	5.82865	2.46e-07	2.39e-05
ENSBTAG00000008105	533516	RNA binding motif protein 38 [Source:VGNC Symbol;Acc:VGNC:33798]	RBM38	1.79587	1.8008	2.98725	2.66e-07	2.57e-05
ENSBTAG00000000983	538996	ATP binding cassette subfamily C member 8 [Source:VGNC Symbol;Acc:VGNC:25475]	ABCC8	-4.2749	-4.38684	-0.816947	2.74e-07	2.63e-05
ENSBTAG00000014538	531339	hippocalcin like 4 [Source:VGNC Symbol;Acc:VGNC:29938]	HPCAL4	1.87278	1.87641	2.74118	2.79e-07	2.66e-05
ENSBTAG00000016455	536020	cache domain containing 1 [Source:VGNC Symbol;Acc:VGNC:26671]	CACHD1	-1.13907	-1.13919	5.81593	2.82e-07	2.66e-05
ENSBTAG00000003601	504576	zinc finger matrin-type 1 [Source:VGNC Symbol;Acc:VGNC:37190]	ZMAT1	-2.85852	-2.87225	0.543826	2.97e-07	2.78e-05
ENSBTAG00000021483	531068	olfactomedin like 1 [Source:VGNC Symbol;Acc:VGNC:32421]	OLFML1	-3.24444	-3.25636	1.08783	3.06e-07	2.85e-05
ENSBTAG00000000140	535293	epoxide hydrolase 1 [Source:VGNC Symbol;Acc:VGNC:28541]	EPHX1	-1.28835	-1.28865	4.50094	3.27e-07	3.02e-05
ENSBTAG00000017223	404180	mesoderm specific transcript [Source:VGNC Symbol;Acc:VGNC:31393]	MEST	-1.0998	-1.09989	6.14138	3.44e-07	3.15e-05
ENSBTAG00000049058	530430	inhibin subunit beta B [Source:VGNC Symbol;Acc:VGNC:30201]	INHBB	1.53431	1.53705	3.34015	3.98e-07	3.63e-05
ENSBTAG00000012817	783681	jagged canonical Notch ligand 1 [Source:VGNC Symbol;Acc:VGNC:30361]	JAG1	2.02603	2.02897	3.7276	4.04e-07	3.65e-05
ENSBTAG00000046668	783907	angiogenin 2 [Source:NCBI gene (formerly Entrezgene);Acc:783907]	ANG2	-1.38109	-1.38226	2.74776	4.16e-07	3.73e-05
ENSBTAG00000006125	504282	polo like kinase 3 [Source:VGNC Symbol;Acc:VGNC:33035]	PLK3	1.55671	1.55852	3.92051	4.29e-07	3.83e-05
ENSBTAG00000017350	517284	piccolo presynaptic cytomatrix protein [Source:VGNC Symbol;Acc:VGNC:32633]	PCLO	-1.7775	-1.7794	2.28681	4.34e-07	3.84e-05
ENSBTAG00000020638	282094	TIMP metallopeptidase inhibitor 3 [Source:VGNC Symbol;Acc:VGNC:35872]	TIMP3	1.06853	1.06856	8.08274	4.49e-07	3.95e-05
ENSBTAG00000013856	616564	single stranded DNA binding protein 2 [Source:VGNC Symbol;Acc:VGNC:50023]	SSBP2	-1.20937	-1.20952	5.51021	4.52e-07	3.95e-05
ENSBTAG00000001489	404053	tubulin, alpha 1a [Source:NCBI gene (formerly Entrezgene);Acc:404053]	TUBA1A	1.03573	1.03576	8.43844	4.68e-07	4.03e-05
ENSBTAG00000009863	506945	basic helix-loop-helix family member e40 [Source:VGNC Symbol;Acc:VGNC:26486]	BHLHE40	1.03166	1.03173	7.40738	4.71e-07	4.03e-05
ENSBTAG00000055045	512251	heat shock protein family B (small) member 7 [Source:VGNC Symbol;Acc:VGNC:49068]	HSPB7	2.78233	2.81071	1.36806	4.72e-07	4.03e-05
ENSBTAG00000020984	537312	Rap guanine nucleotide exchange factor 4 [Source:VGNC Symbol;Acc:VGNC:33725]	RAPGEF4	2.1008	2.10258	4.25349	4.73e-07	4.03e-05
ENSBTAG00000015894	618792	WW domain containing oxidoreductase [Source:VGNC Symbol;Acc:VGNC:36977]	WWOX	-1.71251	-1.71641	1.49858	4.87e-07	4.12e-05
ENSBTAG00000014156	524465	antagonist of mitotic exit network 1 homolog [Source:VGNC Symbol;Acc:VGNC:52604]	AMN1	-1.3546	-1.35535	3.357	5.17e-07	4.34e-05
ENSBTAG00000018546	524279	LPS responsive beige-like anchor protein [Source:VGNC Symbol;Acc:VGNC:30972]	LRBA	-1.5709	-1.57112	5.23749	5.21e-07	4.35e-05
ENSBTAG00000050052	528288	GTPase, IMAP family member 6 [Source:NCBI gene (formerly Entrezgene);Acc:528288]	0	1.71364	1.71845	2.41325	5.48e-07	4.5e-05
ENSBTAG00000037429	317707	5-hydroxytryptamine receptor 1B [Source:VGNC Symbol;Acc:VGNC:29992]	HTR1B	2.42728	2.4341	2.9882	5.51e-07	4.5e-05
ENSBTAG00000010820	613288	Wnt family member 11 [Source:VGNC Symbol;Acc:VGNC:36955]	WNT11	2.16366	2.16817	2.92378	5.52e-07	4.5e-05
ENSBTAG00000001981	407174	solute carrier family 6 member 17 [Source:VGNC Symbol;Acc:VGNC:50163]	SLC6A17	1.59236	1.59251	6.80396	5.53e-07	4.5e-05
ENSBTAG00000012180	541141	Bcl2 modifying factor [Source:VGNC Symbol;Acc:VGNC:26513]	BMF	-1.33765	-1.33821	3.82427	5.65e-07	4.57e-05
ENSBTAG00000016221	535509	angiomotin [Source:VGNC Symbol;Acc:VGNC:25870]	AMOT	-1.11473	-1.11482	6.10117	5.77e-07	4.62e-05
ENSBTAG00000030669	534011	FGGY carbohydrate kinase domain containing [Source:VGNC Symbol;Acc:VGNC:28991]	FGGY	-1.82081	-1.82466	1.3904	5.79e-07	4.62e-05
ENSBTAG00000010907	767949	protein phosphatase 1 regulatory inhibitor subunit 1A [Source:VGNC Symbol;Acc:VGNC:54472]	PPP1R1A	3.96826	4.0468	1.92263	5.82e-07	4.62e-05
ENSBTAG00000002348	282360	solute carrier family 4 member 4 [Source:VGNC Symbol;Acc:VGNC:34894]	SLC4A4	-1.63277	-1.63315	4.60112	5.9e-07	4.66e-05
ENSBTAG00000047380	514876	calcitonin related polypeptide beta [Source:NCBI gene (formerly Entrezgene);Acc:514876]	CALCB	3.63096	3.66749	2.08086	5.96e-07	4.67e-05
ENSBTAG00000050252	#N/A	0	0	3.11549	3.18982	0.852817	6.48e-07	5.05e-05
ENSBTAG00000019975	521554	interleukin 7 receptor [Source:VGNC Symbol;Acc:VGNC:30170]	IL7R	4.9318	5.02596	4.16814	6.51e-07	5.05e-05
ENSBTAG00000023026	281376	serpin family B member 2-like [Source:NCBI gene (formerly Entrezgene);Acc:281376]	0	2.24969	2.2508	5.94247	6.66e-07	5.13e-05
ENSBTAG00000002663	521416	BCAS3 microtubule associated cell migration factor [Source:VGNC Symbol;Acc:VGNC:26438]	BCAS3	-1.56558	-1.56645	3.30971	6.75e-07	5.17e-05
ENSBTAG00000034827	525931	platelet derived growth factor D [Source:VGNC Symbol;Acc:VGNC:32691]	PDGFD	-1.88703	-1.8895	2.13204	6.92e-07	5.27e-05
ENSBTAG00000031441	505584	FXYD domain containing ion transport regulator 5 [Source:VGNC Symbol;Acc:VGNC:29158]	FXYD5	1.41227	1.41307	4.71565	6.98e-07	5.28e-05
ENSBTAG00000020573	529947	signal peptide, CUB domain and EGF like domain containing 2 [Source:VGNC Symbol;Acc:VGNC:34372]	SCUBE2	-1.43411	-1.43464	3.85565	7.15e-07	5.38e-05
ENSBTAG00000011824	280884	osteoglycin [Source:VGNC Symbol;Acc:VGNC:32414]	OGN	-1.792	-1.79446	2.18743	7.33e-07	5.47e-05
ENSBTAG00000034985	540135	pleckstrin homology like domain family A member 1 [Source:VGNC Symbol;Acc:VGNC:32835]	PHLDA1	1.52389	1.52597	4.18398	7.37e-07	5.47e-05
ENSBTAG00000047502	535704	FKBP prolyl isomerase 5 [Source:VGNC Symbol;Acc:VGNC:29024]	FKBP5	-1.13486	-1.13486	9.46275	7.39e-07	5.47e-05
ENSBTAG00000017566	282104	tuftelin 1 [Source:VGNC Symbol;Acc:VGNC:36518]	TUFT1	1.02293	1.02296	8.24809	7.51e-07	5.52e-05
ENSBTAG00000008182	540819	FosB proto-oncogene, AP-1 transcription factor subunit [Source:VGNC Symbol;Acc:VGNC:29074]	FOSB	2.1188	2.14438	1.80733	7.56e-07	5.53e-05
ENSBTAG00000010101	514128	bystin like [Source:VGNC Symbol;Acc:VGNC:26611]	BYSL	1.1663	1.16675	5.30704	8.19e-07	5.96e-05
ENSBTAG00000007424	280840	LIF interleukin 6 family cytokine [Source:VGNC Symbol;Acc:VGNC:30880]	LIF	2.24017	2.24557	3.35525	8.27e-07	5.97e-05
ENSBTAG00000011986	539290	phospholipid scramblase 4 [Source:VGNC Symbol;Acc:VGNC:33053]	PLSCR4	-1.29679	-1.29714	4.48979	8.29e-07	5.97e-05
ENSBTAG00000007173	282301	platelet derived growth factor receptor alpha [Source:VGNC Symbol;Acc:VGNC:32692]	PDGFRA	-1.55308	-1.55515	2.83596	8.63e-07	6.18e-05
ENSBTAG00000033166	#N/A	0	0	-2.02332	-2.02797	1.33218	8.68e-07	6.18e-05
ENSBTAG00000007204	522400	keratin 80 [Source:VGNC Symbol;Acc:VGNC:30742]	KRT80	1.41544	1.41578	5.51959	8.77e-07	6.21e-05
ENSBTAG00000006561	506971	RasGEF domain family member 1B [Source:VGNC Symbol;Acc:VGNC:33744]	RASGEF1B	-1.84728	-1.85201	1.35493	8.86e-07	6.23e-05
ENSBTAG00000021766	522921	heparin binding EGF like growth factor [Source:VGNC Symbol;Acc:VGNC:29765]	HBEGF	1.61629	1.61869	3.8777	8.9e-07	6.23e-05
ENSBTAG00000054342	533051	major histocompatibility class I related protein [Source:NCBI gene (formerly Entrezgene);Acc:533051]	MIC1	2.3212	2.33775	1.60875	9.07e-07	6.32e-05
ENSBTAG00000007778	#N/A	transient receptor potential cation channel subfamily M member 3 [Source:VGNC Symbol;Acc:VGNC:55085]	TRPM3	-1.73212	-1.73558	1.50764	9.23e-07	6.39e-05
ENSBTAG00000012112	530661	solute carrier family 7 member 6 [Source:VGNC Symbol;Acc:VGNC:34931]	SLC7A6	1.32098	1.32116	6.81541	9.47e-07	6.52e-05
ENSBTAG00000011358	505455	immediate early response 3 [Source:VGNC Symbol;Acc:VGNC:30039]	IER3	1.62906	1.62962	6.01716	9.68e-07	6.63e-05
ENSBTAG00000009643	538889	zinc finger and BTB domain containing 25 [Source:VGNC Symbol;Acc:VGNC:37069]	ZBTB25	-1.53157	-1.53341	2.45806	9.83e-07	6.71e-05
ENSBTAG00000010166	104976701	Bos taurus CD99 molecule (MIC2), mRNA. [Source:RefSeq mRNA;Acc:NM_001281907]	MIC2	2.34127	2.3591	1.94647	1.03e-06	7.02e-05
ENSBTAG00000049588	616425	SPT4 homolog, DSIF elongation factor subunit [Source:NCBI gene (formerly Entrezgene);Acc:616425]	SUPT4H1	1.3012	1.30143	6.5411	1.05e-06	7.05e-05
ENSBTAG00000005373	281544	tropomyosin 1 [Source:NCBI gene (formerly Entrezgene);Acc:281544]	TPM1	1.10039	1.10039	11.4818	1.05e-06	7.05e-05
ENSBTAG00000020736	286849	CD40 molecule [Source:VGNC Symbol;Acc:VGNC:27033]	CD40	1.40089	1.40242	3.87278	1.05e-06	7.05e-05
ENSBTAG00000011185	529791	tetratricopeptide repeat domain 23 [Source:VGNC Symbol;Acc:VGNC:36461]	TTC23	-1.69926	-1.70226	1.7572	1.08e-06	7.2e-05
ENSBTAG00000019839	510559	latent transforming growth factor beta binding protein 1 [Source:VGNC Symbol;Acc:VGNC:31071]	LTBP1	-1.64788	-1.65015	2.03978	1.12e-06	7.4e-05
ENSBTAG00000017875	538835	Rho GTPase activating protein 30 [Source:VGNC Symbol;Acc:VGNC:26088]	ARHGAP30	2.57182	2.57977	2.95266	1.15e-06	7.55e-05
ENSBTAG00000012317	493724	purine nucleoside phosphorylase [Source:NCBI gene (formerly Entrezgene);Acc:493724]	PNP	-1.09371	-1.09373	8.69962	1.21e-06	7.89e-05
ENSBTAG00000016388	507969	solute carrier organic anion transporter family member 4A1 [Source:VGNC Symbol;Acc:VGNC:34954]	SLCO4A1	2.99129	3.00512	3.01302	1.21e-06	7.9e-05
ENSBTAG00000010671	785371	GLI family zinc finger 3 [Source:VGNC Symbol;Acc:VGNC:29401]	GLI3	-1.13966	-1.13973	6.51898	1.26e-06	8.14e-05
ENSBTAG00000020796	535287	ubiquitin conjugating enzyme E2 D1 [Source:VGNC Symbol;Acc:VGNC:36579]	UBE2D1	-1.34552	-1.34606	4.10285	1.29e-06	8.3e-05
ENSBTAG00000011246	505502	forkhead box P2 [Source:VGNC Symbol;Acc:VGNC:53644]	FOXP2	-1.52654	-1.52796	2.51758	1.3e-06	8.33e-05
ENSBTAG00000005305	280881	neurotensin [Source:VGNC Symbol;Acc:VGNC:32311]	NTS	1.93957	1.93998	7.6584	1.32e-06	8.43e-05
ENSBTAG00000046155	280910	regucalcin [Source:VGNC Symbol;Acc:VGNC:33907]	RGN	-2.24114	-2.24812	1.09261	1.35e-06	8.56e-05
ENSBTAG00000053187	526745	fer-1-like protein 4 [Source:NCBI gene (formerly Entrezgene);Acc:526745]	0	2.47673	2.48159	3.50649	1.35e-06	8.56e-05
ENSBTAG00000049333	112443175	tumor necrosis factor alpha-induced protein 2-like [Source:NCBI gene (formerly Entrezgene);Acc:112443175]	0	4.04037	4.29915	0.529954	1.38e-06	8.68e-05
ENSBTAG00000032519	786620	calmodulin-lysine N-methyltransferase [Source:VGNC Symbol;Acc:VGNC:26727]	CAMKMT	-1.78959	-1.79386	1.33034	1.44e-06	9.03e-05
ENSBTAG00000014178	507082	Ral GTPase activating protein catalytic subunit alpha 2 [Source:VGNC Symbol;Acc:VGNC:33702]	RALGAPA2	-1.72475	-1.73186	0.518006	1.46e-06	9.08e-05
ENSBTAG00000021632	281312	methionine sulfoxide reductase A [Source:VGNC Symbol;Acc:VGNC:31705]	MSRA	-1.8864	-1.89146	1.15664	1.5e-06	9.29e-05
ENSBTAG00000020159	618218	sodium/potassium transporting ATPase interacting 1 [Source:VGNC Symbol;Acc:VGNC:32091]	NKAIN1	1.46291	1.46573	3.18562	1.58e-06	9.73e-05
ENSBTAG00000007644	618399	G protein subunit gamma 7 [Source:VGNC Symbol;Acc:VGNC:29468]	GNG7	-1.82369	-1.82775	1.28446	1.59e-06	9.8e-05
ENSBTAG00000008921	504819	nexilin F-actin binding protein [Source:VGNC Symbol;Acc:VGNC:32025]	NEXN	1.43242	1.4326	6.81447	1.64e-06	9.98e-05
ENSBTAG00000008545	515266	activating transcription factor 3 [Source:VGNC Symbol;Acc:VGNC:26241]	ATF3	1.40049	1.40082	5.9325	1.64e-06	9.98e-05
ENSBTAG00000017405	527470	RAR related orphan receptor C [Source:VGNC Symbol;Acc:VGNC:34090]	RORC	-3.10845	-3.13648	-0.147394	1.65e-06	9.98e-05
ENSBTAG00000001609	286883	mitogen-activated protein kinase kinase 6 [Source:VGNC Symbol;Acc:VGNC:31187]	MAP2K6	-2.17581	-2.18409	0.597969	1.66e-06	0.000100134
ENSBTAG00000043550	3283889	cytochrome b [Source:NCBI gene (formerly Entrezgene);Acc:3283889]	CYTB	-1.16494	-1.16495	11.3808	1.67e-06	0.000100134
ENSBTAG00000018007	281945	nuclear receptor subfamily 2 group F member 2 [Source:VGNC Symbol;Acc:VGNC:32241]	NR2F2	-1.19157	-1.19164	6.55913	1.71e-06	0.000101892
ENSBTAG00000001864	528877	nuclear receptor subfamily 4 group A member 3 [Source:VGNC Symbol;Acc:VGNC:32247]	NR4A3	2.13723	2.14733	3.371	1.76e-06	0.00010478
ENSBTAG00000003147	537201	Janus kinase 1 [Source:VGNC Symbol;Acc:VGNC:30364]	JAK1	-0.989742	-0.989768	7.83125	1.81e-06	0.000106687
ENSBTAG00000008635	282485	sulfotransferase family, cytosolic, 1A, phenol-preferring, member 1 [Source:NCBI gene (formerly Entrezgene);Acc:282485]	SULT1A1	-1.10479	-1.10481	8.73005	1.81e-06	0.000106687
ENSBTAG00000018404	282004	protein kinase cGMP-dependent 1 [Source:VGNC Symbol;Acc:VGNC:33340]	PRKG1	-2.42657	-2.43443	0.968704	1.83e-06	0.000107482
ENSBTAG00000024000	616225	atonal bHLH transcription factor 8 [Source:VGNC Symbol;Acc:VGNC:26272]	ATOH8	-1.47921	-1.47984	3.71523	1.87e-06	0.000109405
ENSBTAG00000012584	539935	gap junction protein beta 3 [Source:VGNC Symbol;Acc:VGNC:29378]	GJB3	1.50657	1.5093	3.40477	1.92e-06	0.000111735
ENSBTAG00000001725	615107	C-X-C motif chemokine ligand 10 [Source:VGNC Symbol;Acc:VGNC:27846]	CXCL10	-1.46719	-1.46751	4.70891	1.95e-06	0.000113015
ENSBTAG00000009012	541148	pentraxin 3 [Source:VGNC Symbol;Acc:VGNC:33566]	PTX3	-1.64495	-1.64833	1.55456	1.97e-06	0.000113767
ENSBTAG00000050113	#N/A	0	0	-3.04444	-3.09337	-0.857351	1.98e-06	0.000113767
ENSBTAG00000040151	286815	GTP cyclohydrolase 1 [Source:VGNC Symbol;Acc:VGNC:29286]	GCH1	1.56191	1.56464	3.31785	1.99e-06	0.000113767
ENSBTAG00000020178	533618	arylsulfatase family member K [Source:VGNC Symbol;Acc:VGNC:26179]	ARSK	-2.17326	-2.1854	0.21673	2.02e-06	0.000114883
ENSBTAG00000013176	615490	SPARC related modular calcium binding 2 [Source:VGNC Symbol;Acc:VGNC:35027]	SMOC2	-1.42234	-1.42272	4.27906	2.06e-06	0.000116612
ENSBTAG00000001112	527211	spermine oxidase [Source:VGNC Symbol;Acc:VGNC:35028]	SMOX	-1.3805	-1.38099	4.0074	2.12e-06	0.000119398
ENSBTAG00000054135	#N/A	0	0	3.31859	3.36712	1.6315	2.16e-06	0.000121548
ENSBTAG00000033365	785203	methyltransferase like 24 [Source:VGNC Symbol;Acc:VGNC:31409]	METTL24	-3.65402	-3.74773	-1.11367	2.21e-06	0.000123317
ENSBTAG00000048511	#N/A	0	0	2.44024	2.46733	2.03535	2.27e-06	0.000126192
ENSBTAG00000017514	524530	cyclin D1 [Source:VGNC Symbol;Acc:VGNC:26962]	CCND1	2.22919	2.23074	4.57069	2.37e-06	0.000131591
ENSBTAG00000052140	617493	allograft inflammatory factor 1 like [Source:VGNC Symbol;Acc:VGNC:25760]	AIF1L	0.975534	0.975593	7.23883	2.4e-06	0.000132746
ENSBTAG00000011932	280867	proteoglycan 4 [Source:VGNC Symbol;Acc:VGNC:33314]	PRG4	-1.66023	-1.66098	3.67238	2.49e-06	0.000136632
ENSBTAG00000020799	616280	exocyst complex component 6B [Source:VGNC Symbol;Acc:VGNC:28651]	EXOC6B	-1.34126	-1.34173	3.98931	2.57e-06	0.000140732
ENSBTAG00000005284	513955	serpin family E member 3 [Source:VGNC Symbol;Acc:VGNC:34477]	SERPINE3	3.58659	3.65415	1.62984	2.6e-06	0.000141004
ENSBTAG00000016711	414346	peptidylprolyl isomerase F [Source:VGNC Symbol;Acc:VGNC:33198]	PPIF	1.36917	1.37005	4.67449	2.61e-06	0.000141004
ENSBTAG00000005247	533321	FERM domain containing 3 [Source:VGNC Symbol;Acc:VGNC:29113]	FRMD3	-3.06685	-3.13028	-1.1271	2.61e-06	0.000141004
ENSBTAG00000010303	281839	intercellular adhesion molecule 1 [Source:VGNC Symbol;Acc:VGNC:50197]	ICAM1	1.79125	1.7917	6.44863	2.65e-06	0.000142868
ENSBTAG00000052722	#N/A	0	0	1.50318	1.50555	3.00708	2.68e-06	0.000143448
ENSBTAG00000017746	615883	slit guidance ligand 3 [Source:VGNC Symbol;Acc:VGNC:34961]	SLIT3	-1.59595	-1.59653	3.78112	2.69e-06	0.000143691
ENSBTAG00000038215	534256	chloride channel accessory 2 [Source:VGNC Symbol;Acc:VGNC:27393]	CLCA2	3.35236	3.52329	-0.0582414	2.73e-06	0.000145128
ENSBTAG00000006293	767997	placenta enriched 1 [Source:VGNC Symbol;Acc:VGNC:32968]	PLAC1	-2.64406	-2.68219	-0.880209	2.74e-06	0.000145128
ENSBTAG00000038117	787344	autophagy related 10 [Source:VGNC Symbol;Acc:VGNC:26248]	ATG10	-1.69978	-1.70327	1.39059	2.75e-06	0.000145128
ENSBTAG00000007698	507157	transmembrane protein 59 like [Source:VGNC Symbol;Acc:VGNC:36100]	TMEM59L	2.38015	2.3814	5.45906	2.8e-06	0.000146669
ENSBTAG00000015293	541093	neurexophilin 3 [Source:VGNC Symbol;Acc:VGNC:32382]	NXPH3	1.5362	1.53832	3.32568	2.8e-06	0.000146669
ENSBTAG00000019194	508335	shieldin complex subunit 2 [Source:VGNC Symbol;Acc:VGNC:28808]	SHLD2	-1.6363	-1.63804	2.39781	2.92e-06	0.000152257
ENSBTAG00000048485	100295973	tubulin beta 2A class IIa [Source:NCBI gene (formerly Entrezgene);Acc:100295973]	TUBB2A	1.65442	1.65551	4.30706	3.02e-06	0.000155698
ENSBTAG00000016277	615506	mitochondrial amidoxime reducing component 2 [Source:VGNC Symbol;Acc:VGNC:97289]	MTARC2	-1.27264	-1.2729	4.7871	3.03e-06	0.000155698
ENSBTAG00000011424	497015	tropomyosin 2 [Source:VGNC Symbol;Acc:VGNC:36252]	TPM2	1.4063	1.40634	8.67346	3.03e-06	0.000155698
ENSBTAG00000002982	518986	PITPNM family member 3 [Source:VGNC Symbol;Acc:VGNC:52807]	PITPNM3	-2.32875	-2.34151	0.23483	3.04e-06	0.000155698
ENSBTAG00000026971	613318	cell division cycle associated 5 [Source:VGNC Symbol;Acc:VGNC:56261]	CDCA5	1.17195	1.17245	4.76125	3.05e-06	0.000156044
ENSBTAG00000032121	100125578	succinyl-CoA:glutarate-CoA transferase [Source:VGNC Symbol;Acc:VGNC:35462]	SUGCT	-2.53037	-2.54765	0.0245931	3.11e-06	0.000158124
ENSBTAG00000008631	282196	coronin 1A [Source:VGNC Symbol;Acc:VGNC:27620]	CORO1A	1.58742	1.59153	2.3526	3.12e-06	0.000158128
ENSBTAG00000048029	281308	matrix metallopeptidase 1 (interstitial collagenase) [Source:NCBI gene (formerly Entrezgene);Acc:281308]	MMP1	3.28308	3.29166	4.75127	3.13e-06	0.000158286
ENSBTAG00000013462	516017	L1 cell adhesion molecule [Source:VGNC Symbol;Acc:VGNC:30760]	L1CAM	2.26835	2.27257	3.54494	3.16e-06	0.000158746
ENSBTAG00000015818	112441463	interstitial collagenase-like [Source:NCBI gene (formerly Entrezgene);Acc:112441463]	0	3.15979	3.1687	4.61118	3.17e-06	0.000158746
ENSBTAG00000045767	505016	linker for activation of T cells family member 2 [Source:VGNC Symbol;Acc:VGNC:30799]	LAT2	4.00461	4.11357	0.796822	3.28e-06	0.000163366
ENSBTAG00000000494	539556	phosphodiesterase 4D [Source:VGNC Symbol;Acc:VGNC:32677]	PDE4D	-1.39	-1.39216	2.26759	3.29e-06	0.000163366
ENSBTAG00000002938	617867	cadherin like and PC-esterase domain containing 1 [Source:VGNC Symbol;Acc:VGNC:27651]	CPED1	-1.23334	-1.23372	4.19069	3.35e-06	0.000165539
ENSBTAG00000014831	539466	protein phosphatase 1 regulatory subunit 3C [Source:VGNC Symbol;Acc:VGNC:33244]	PPP1R3C	-2.09642	-2.10075	1.77811	3.35e-06	0.000165539
ENSBTAG00000004432	100336905	Bos taurus chordin like 1 (CHRDL1), mRNA. [Source:RefSeq mRNA;Acc:NM_001205187]	CHRDL1	-1.07343	-1.07358	5.28403	3.41e-06	0.000167521
ENSBTAG00000014614	515610	actin alpha 2, smooth muscle [Source:NCBI gene (formerly Entrezgene);Acc:515610]	ACTA2	1.81392	1.81394	10.0535	3.46e-06	0.0001693
ENSBTAG00000021133	511615	teneurin transmembrane protein 3 [Source:VGNC Symbol;Acc:VGNC:35743]	TENM3	-1.38925	-1.38988	3.5275	3.57e-06	0.000173766
ENSBTAG00000005929	#N/A	spectrin beta, non-erythrocytic 2 [Source:HGNC Symbol;Acc:HGNC:11276]	SPTBN2	1.55399	1.55504	4.87775	3.57e-06	0.000173766
ENSBTAG00000018252	538517	arrestin domain containing 4 [Source:VGNC Symbol;Acc:VGNC:26174]	ARRDC4	-1.17732	-1.17756	5.13502	3.59e-06	0.000173817
ENSBTAG00000002340	538861	STEAP4 metalloreductase [Source:VGNC Symbol;Acc:VGNC:35381]	STEAP4	-3.335	-3.41561	-0.894866	3.61e-06	0.000174169
ENSBTAG00000014575	511602	collagen type IV alpha 5 chain [Source:VGNC Symbol;Acc:VGNC:50084]	COL4A5	-1.06467	-1.06468	9.10375	3.68e-06	0.00017661
ENSBTAG00000031774	515957	H1.12 linker histone, cluster member [Source:VGNC Symbol;Acc:VGNC:83563]	H1-12	-2.15378	-2.17838	-0.453002	3.69e-06	0.00017661
ENSBTAG00000047213	112441497	G protein-coupled receptor associated sorting protein 1 [Source:NCBI gene (formerly Entrezgene);Acc:112441497]	0	-1.20879	-1.20968	3.01333	3.83e-06	0.000182886
ENSBTAG00000010716	107131184	Fraser extracellular matrix complex subunit 1 [Source:VGNC Symbol;Acc:VGNC:59334]	FRAS1	1.11284	1.11302	5.93561	3.9e-06	0.000185567
ENSBTAG00000030198	100295019	transmembrane protein 232 [Source:VGNC Symbol;Acc:VGNC:36046]	TMEM232	-2.079	-2.08957	0.238743	3.95e-06	0.000187053
ENSBTAG00000032481	574085	death associated protein like 1 [Source:VGNC Symbol;Acc:VGNC:27879]	DAPL1	-1.35787	-1.35847	3.63096	4.07e-06	0.000192095
ENSBTAG00000019804	513526	small nuclear ribonucleoprotein U11/U12 subunit 25 [Source:VGNC Symbol;Acc:VGNC:35069]	SNRNP25	1.30519	1.30543	6.43159	4.18e-06	0.000196476
ENSBTAG00000013136	617365	EF-hand calcium binding domain 11 [Source:VGNC Symbol;Acc:VGNC:28340]	EFCAB11	-1.29758	-1.29932	2.16363	4.49e-06	0.000210361
ENSBTAG00000001303	539524	heat shock protein family B (small) member 8 [Source:VGNC Symbol;Acc:VGNC:53907]	HSPB8	1.04259	1.04302	5.03429	4.77e-06	0.000222461
ENSBTAG00000005714	533219	actin alpha cardiac muscle 1 [Source:VGNC Symbol;Acc:VGNC:25574]	ACTC1	2.02846	2.04357	1.8456	4.78e-06	0.000222461
ENSBTAG00000032092	785475	cadherin 11 [Source:VGNC Symbol;Acc:VGNC:27092]	CDH11	-1.16605	-1.16607	8.84573	4.88e-06	0.000226024
ENSBTAG00000021202	514788	acyl-CoA thioesterase 7 [Source:NCBI gene (formerly Entrezgene);Acc:514788]	ACOT7	1.20184	1.20223	5.19575	4.96e-06	0.00022922
ENSBTAG00000000836	281269	keratin 8 [Source:VGNC Symbol;Acc:VGNC:50407]	KRT8	1.12181	1.12182	10.6022	5e-06	0.000230034
ENSBTAG00000004562	511000	CD207 molecule [Source:VGNC Symbol;Acc:VGNC:27011]	CD207	-1.25846	-1.25943	2.83308	5.03e-06	0.000230614
ENSBTAG00000048631	536517	TIAM Rac1 associated GEF 1 [Source:NCBI gene (formerly Entrezgene);Acc:536517]	0	-1.62501	-1.62611	2.97785	5.12e-06	0.000233872
ENSBTAG00000048497	#N/A	0	0	1.19609	1.19731	3.68712	5.17e-06	0.000235489
ENSBTAG00000016991	100139818	ephrin B2 [Source:VGNC Symbol;Acc:VGNC:28360]	EFNB2	1.3281	1.32908	3.60537	5.31e-06	0.000241241
ENSBTAG00000010427	539767	Ras association domain family member 5 [Source:VGNC Symbol;Acc:VGNC:33761]	RASSF5	1.10303	1.1041	3.53427	5.5e-06	0.000248826
ENSBTAG00000015369	539519	MLLT11 transcription factor 7 cofactor [Source:VGNC Symbol;Acc:VGNC:31502]	MLLT11	1.39122	1.39196	4.8256	5.54e-06	0.000249544
ENSBTAG00000017245	536616	COPI coat complex subunit gamma 2 [Source:VGNC Symbol;Acc:VGNC:27597]	COPG2	-1.15333	-1.15351	5.15294	5.76e-06	0.000258913
ENSBTAG00000009679	525772	pleckstrin homology and RhoGEF domain containing G1 [Source:VGNC Symbol;Acc:VGNC:33014]	PLEKHG1	3.31162	3.3779	1.33588	6.08e-06	0.00027136
ENSBTAG00000002576	781681	gliomedin [Source:VGNC Symbol;Acc:VGNC:29396]	GLDN	1.63854	1.64087	2.72019	6.08e-06	0.00027136
ENSBTAG00000003490	509821	engulfment and cell motility 1 [Source:VGNC Symbol;Acc:VGNC:28438]	ELMO1	-1.93333	-1.93419	3.65034	6.11e-06	0.000271546
ENSBTAG00000022991	525624	neurobeachin [Source:VGNC Symbol;Acc:VGNC:31893]	NBEA	-1.40441	-1.40534	3.11463	6.21e-06	0.000275177
ENSBTAG00000046755	#N/A	0	0	-2.2313	-2.24776	-0.146709	6.45e-06	0.000284964
ENSBTAG00000025903	507688	glycine decarboxylase [Source:VGNC Symbol;Acc:VGNC:29395]	GLDC	1.88662	1.89952	1.25753	6.55e-06	0.000288315
ENSBTAG00000015872	282431	prokineticin receptor 2 [Source:VGNC Symbol;Acc:VGNC:33363]	PROKR2	2.15694	2.17417	1.43146	6.93e-06	0.000303969
ENSBTAG00000000919	538619	hes related family bHLH transcription factor with YRPW motif 2 [Source:VGNC Symbol;Acc:VGNC:29829]	HEY2	3.02151	3.06882	1.34299	7.4e-06	0.000322994
ENSBTAG00000011338	100125763	neuronal regeneration related protein [Source:NCBI gene (formerly Entrezgene);Acc:100125763]	NREP	-1.84288	-1.84355	3.92317	7.41e-06	0.000322994
ENSBTAG00000020614	507041	protein kinase C epsilon [Source:VGNC Symbol;Acc:VGNC:33330]	PRKCE	-1.49759	-1.49897	2.54192	7.68e-06	0.000333402
ENSBTAG00000001829	518062	solute carrier family 17 member 9 [Source:VGNC Symbol;Acc:VGNC:34704]	SLC17A9	1.71358	1.71765	2.7659	7.79e-06	0.000336944
ENSBTAG00000013065	497622	homeostatic iron regulator [Source:VGNC Symbol;Acc:VGNC:29831]	HFE	-1.13822	-1.13869	3.77988	7.94e-06	0.00034239
ENSBTAG00000017775	616342	SHH signaling and ciliogenesis regulator SDCCAG8 [Source:VGNC Symbol;Acc:VGNC:96545]	SDCCAG8	-1.13605	-1.13668	3.381	7.97e-06	0.000342518
ENSBTAG00000002695	#N/A	myosin IH [Source:VGNC Symbol;Acc:VGNC:31823]	MYO1H	1.73096	1.73306	3.60173	8.09e-06	0.000346491
ENSBTAG00000021487	104968463	circadian associated repressor of transcription [Source:VGNC Symbol;Acc:VGNC:27358]	CIART	-1.25027	-1.25114	3.16937	8.13e-06	0.000347156
ENSBTAG00000000986	530709	USH1 protein network component harmonin [Source:VGNC Symbol;Acc:VGNC:36704]	USH1C	1.20067	1.20126	4.45419	8.23e-06	0.000350394
ENSBTAG00000005300	514936	transmembrane protein 51 [Source:VGNC Symbol;Acc:VGNC:36094]	TMEM51	1.04024	1.04063	4.89135	8.55e-06	0.000362829
ENSBTAG00000004585	#N/A	coiled-coil domain containing 30 [Source:VGNC Symbol;Acc:VGNC:26891]	CCDC30	-1.66342	-1.66546	2.19791	8.62e-06	0.000364373
ENSBTAG00000022613	510767	cytochrome c, somatic [Source:NCBI gene (formerly Entrezgene);Acc:510767]	CYCS	1.16605	1.16653	5.1758	8.64e-06	0.000364373
ENSBTAG00000040409	790886	uncharacterized LOC790886 [Source:NCBI gene (formerly Entrezgene);Acc:790886]	0	-3.37495	-3.41357	-0.294727	8.68e-06	0.000364654
ENSBTAG00000017425	407154	gap junction protein beta 2 [Source:VGNC Symbol;Acc:VGNC:29377]	GJB2	1.62167	1.626	3.56689	8.71e-06	0.000365012
ENSBTAG00000005238	786958	NCK associated protein 5 [Source:VGNC Symbol;Acc:VGNC:56130]	NCKAP5	-3.47578	-3.58334	-1.4096	8.96e-06	0.000373937
ENSBTAG00000032613	508224	secretogranin V [Source:VGNC Symbol;Acc:VGNC:34334]	SCG5	-1.7689	-1.7761	0.58593	9.09e-06	0.000378483
ENSBTAG00000015470	514665	synaptophysin like 2 [Source:VGNC Symbol;Acc:VGNC:54496]	SYPL2	1.7332	1.73979	1.45927	9.32e-06	0.000386261
ENSBTAG00000046333	101904203	chromosome 6 C4orf54 homolog [Source:VGNC Symbol;Acc:VGNC:58594]	C6H4orf54	5.11061	5.60244	0.212007	9.34e-06	0.000386261
ENSBTAG00000016217	617625	RNA binding motif protein 43 [Source:VGNC Symbol;Acc:VGNC:33802]	RBM43	-1.15738	-1.15829	2.87624	9.41e-06	0.000388068
ENSBTAG00000010238	613482	leukotriene B4 receptor [Source:VGNC Symbol;Acc:VGNC:31069]	LTB4R	1.82751	1.831	3.89994	9.49e-06	0.000390122
ENSBTAG00000046337	534206	tubulin beta 6 class V [Source:VGNC Symbol;Acc:VGNC:36509]	TUBB6	1.59387	1.59401	7.22919	9.59e-06	0.000392666
ENSBTAG00000017691	100335299	KIAA0040 ortholog [Source:NCBI gene (formerly Entrezgene);Acc:100335299]	0	1.15493	1.15617	3.33873	9.73e-06	0.000397479
ENSBTAG00000009733	513483	fructose-bisphosphatase 1 [Source:VGNC Symbol;Acc:VGNC:28887]	FBP1	1.6316	1.63788	1.70707	9.85e-06	0.000401021
ENSBTAG00000008541	493719	microsomal glutathione S-transferase 1 [Source:VGNC Symbol;Acc:VGNC:31451]	MGST1	-1.21723	-1.2173	6.54301	1.01e-05	0.000407709
ENSBTAG00000017104	281333	mucin 1, cell surface associated [Source:VGNC Symbol;Acc:VGNC:59186]	MUC1	1.39075	1.39371	2.67344	1.01e-05	0.000407709
ENSBTAG00000018638	517240	coiled-coil and C2 domain containing 2A [Source:VGNC Symbol;Acc:VGNC:26826]	CC2D2A	-1.17533	-1.17568	4.15345	1.01e-05	0.000408951
ENSBTAG00000006256	541043	protein tyrosine phosphatase receptor type O [Source:VGNC Symbol;Acc:VGNC:33555]	PTPRO	-1.36038	-1.3607	4.3976	1.02e-05	0.000410954
ENSBTAG00000053661	#N/A	0	0	1.86052	1.87229	1.18142	1.05e-05	0.000419676
ENSBTAG00000021953	506466	LARGE xylosyl- and glucuronyltransferase 1 [Source:VGNC Symbol;Acc:VGNC:54444]	LARGE1	-1.12197	-1.12214	5.20918	1.14e-05	0.000455713
ENSBTAG00000010029	537173	ELKS/RAB6-interacting/CAST family member 2 [Source:VGNC Symbol;Acc:VGNC:28567]	ERC2	-2.20294	-2.22083	-0.252287	1.15e-05	0.000459394
ENSBTAG00000021161	618618	cellular repressor of E1A stimulated genes 2 [Source:VGNC Symbol;Acc:VGNC:27703]	CREG2	2.64274	2.66287	1.72211	1.19e-05	0.000473769
ENSBTAG00000005998	540641	nocturnin [Source:VGNC Symbol;Acc:VGNC:32149]	NOCT	1.35931	1.36149	3.59759	1.21e-05	0.000477974
ENSBTAG00000021911	540575	protein tyrosine phosphatase receptor type G [Source:VGNC Symbol;Acc:VGNC:33551]	PTPRG	-1.6227	-1.62337	3.77658	1.21e-05	0.000477974
ENSBTAG00000043563	3283887	NADH dehydrogenase subunit 5 [Source:NCBI gene (formerly Entrezgene);Acc:3283887]	ND5	-1.06052	-1.06052	11.6558	1.22e-05	0.000480326
ENSBTAG00000044125	614522	transmembrane protein 56 [Source:NCBI gene (formerly Entrezgene);Acc:614522]	TLCD4	-1.11544	-1.11583	4.11376	1.22e-05	0.000480326
ENSBTAG00000027151	538219	Rho GTPase activating protein 26 [Source:VGNC Symbol;Acc:VGNC:26084]	ARHGAP26	-1.54293	-1.54682	1.14948	1.23e-05	0.000481978
ENSBTAG00000016627	531488	WASP family member 1 [Source:VGNC Symbol;Acc:VGNC:36865]	WASF1	-1.81592	-1.82623	0.249276	1.24e-05	0.000481978
ENSBTAG00000009477	790878	pirin [Source:VGNC Symbol;Acc:VGNC:32915]	PIR	-1.39452	-1.39517	3.59617	1.24e-05	0.000481978
ENSBTAG00000054306	#N/A	0	0	1.0927	1.09295	5.78098	1.27e-05	0.000492608
ENSBTAG00000014402	531516	GTPase, IMAP family member 8 [Source:VGNC Symbol;Acc:VGNC:29357]	GIMAP8	1.28693	1.28736	5.12782	1.28e-05	0.000495333
ENSBTAG00000007036	518849	solute carrier family 17 member 7 [Source:VGNC Symbol;Acc:VGNC:34702]	SLC17A7	1.64246	1.64857	1.85433	1.29e-05	0.000495333
ENSBTAG00000025942	512259	15-hydroxyprostaglandin dehydrogenase [Source:VGNC Symbol;Acc:VGNC:56973]	HPGD	-1.81355	-1.81558	2.30147	1.29e-05	0.000497281
ENSBTAG00000025589	530159	CDK5 regulatory subunit associated protein 1 like 1 [Source:VGNC Symbol;Acc:VGNC:27137]	CDKAL1	-1.25186	-1.25234	3.83439	1.32e-05	0.000503709
ENSBTAG00000020648	535130	sec1 family domain containing 2 [Source:VGNC Symbol;Acc:VGNC:34331]	SCFD2	-1.24392	-1.24433	4.11886	1.32e-05	0.000503709
ENSBTAG00000054628	617469	prostate transmembrane protein, androgen induced 1 [Source:NCBI gene (formerly Entrezgene);Acc:617469]	PMEPA1	1.23376	1.23403	5.73387	1.32e-05	0.000503709
ENSBTAG00000021685	515233	eukaryotic translation elongation factor 1 alpha 2 [Source:VGNC Symbol;Acc:VGNC:50164]	EEF1A2	2.78422	2.82336	1.37626	1.35e-05	0.000511464
ENSBTAG00000018016	614673	nuclear protein 1, transcriptional regulator [Source:VGNC Symbol;Acc:VGNC:32369]	NUPR1	-1.4577	-1.45822	3.90906	1.35e-05	0.000511618
ENSBTAG00000008605	789044	dynein axonemal heavy chain 2 [Source:VGNC Symbol;Acc:VGNC:28125]	DNAH2	3.0457	3.17258	-0.281616	1.38e-05	0.000522879
ENSBTAG00000007319	517405	jagged canonical Notch ligand 2 [Source:VGNC Symbol;Acc:VGNC:30362]	JAG2	2.17331	2.1768	3.686	1.47e-05	0.000554637
ENSBTAG00000005850	540262	delta like non-canonical Notch ligand 2 [Source:VGNC Symbol;Acc:VGNC:28093]	DLK2	3.28245	3.33086	1.39028	1.49e-05	0.000559934
ENSBTAG00000048296	513188	collectrin, amino acid transport regulator [Source:NCBI gene (formerly Entrezgene);Acc:513188]	CLTRN	-1.1875	-1.18803	3.75601	1.53e-05	0.000574009
ENSBTAG00000021050	513144	endothelin converting enzyme like 1 [Source:VGNC Symbol;Acc:VGNC:28304]	ECEL1	3.66962	3.80235	1.31965	1.54e-05	0.000576655
ENSBTAG00000016042	515889	transmembrane 6 superfamily member 2 [Source:VGNC Symbol;Acc:VGNC:35909]	TM6SF2	1.34507	1.34942	1.92856	1.57e-05	0.000586132
ENSBTAG00000013860	505463	growth arrest and DNA damage inducible alpha [Source:VGNC Symbol;Acc:VGNC:29206]	GADD45A	1.02922	1.02939	6.17536	1.62e-05	0.000600089
ENSBTAG00000001492	535347	FYN binding protein 1 [Source:VGNC Symbol;Acc:VGNC:29160]	FYB1	-1.76973	-1.77441	1.02884	1.62e-05	0.000600089
ENSBTAG00000012969	541161	dickkopf WNT signaling pathway inhibitor 2 [Source:VGNC Symbol;Acc:VGNC:28080]	DKK2	1.19758	1.19867	4.02653	1.63e-05	0.00060243
ENSBTAG00000004459	509461	transmembrane protein 45A [Source:NCBI gene (formerly Entrezgene);Acc:509461]	TMEM45A	-1.07119	-1.07129	5.75285	1.64e-05	0.000603698
ENSBTAG00000004099	787062	coiled-coil domain containing 170 [Source:VGNC Symbol;Acc:VGNC:26867]	CCDC170	-2.07842	-2.08415	1.09258	1.65e-05	0.000607131
ENSBTAG00000003265	505225	adducin 3 [Source:VGNC Symbol;Acc:VGNC:25655]	ADD3	-1.06693	-1.06698	7.05805	1.66e-05	0.000607131
ENSBTAG00000003705	100139162	family with sequence similarity 83 member G [Source:VGNC Symbol;Acc:VGNC:28838]	FAM83G	1.36321	1.36525	3.14819	1.69e-05	0.000615936
ENSBTAG00000039509	516026	G protein-coupled receptor class C group 5 member A [Source:VGNC Symbol;Acc:VGNC:29606]	GPRC5A	1.52849	1.52995	3.96276	1.69e-05	0.00061661
ENSBTAG00000031886	614958	H2B clustered histone 15 [Source:VGNC Symbol;Acc:VGNC:83587]	H2BC15	-1.53893	-1.5397	3.75105	1.74e-05	0.000631934
ENSBTAG00000005603	516104	C-X-C motif chemokine ligand 11 [Source:VGNC Symbol;Acc:VGNC:27847]	CXCL11	-1.63801	-1.6389	3.43296	1.76e-05	0.000635072
ENSBTAG00000011101	516921	EMAP like 6 [Source:VGNC Symbol;Acc:VGNC:28480]	EML6	-1.69469	-1.70315	0.410402	1.77e-05	0.000640049
ENSBTAG00000001250	505849	transcription factor AP-2 alpha [Source:VGNC Symbol;Acc:VGNC:35776]	TFAP2A	-0.936907	-0.936953	6.9198	1.87e-05	0.000674438
ENSBTAG00000012058	617688	GDP-mannose 4,6-dehydratase [Source:VGNC Symbol;Acc:VGNC:55901]	GMDS	-1.56851	-1.57018	2.41285	1.94e-05	0.000695065
ENSBTAG00000026919	613986	PX domain containing 1 [Source:VGNC Symbol;Acc:VGNC:33582]	PXDC1	1.364	1.36516	3.63399	1.98e-05	0.000708282
ENSBTAG00000009760	515736	uncharacterized LOC515736 [Source:NCBI gene (formerly Entrezgene);Acc:515736]	0	-1.02555	-1.02575	4.9983	2.02e-05	0.000719916
ENSBTAG00000006835	281301	melanoma cell adhesion molecule [Source:NCBI gene (formerly Entrezgene);Acc:281301]	MCAM	1.47629	1.47736	4.18789	2.02e-05	0.000719916
ENSBTAG00000019596	516334	G protein-coupled receptor class C group 5 member B [Source:VGNC Symbol;Acc:VGNC:29607]	GPRC5B	1.41125	1.41223	4.20289	2.07e-05	0.000734532
ENSBTAG00000050233	785916	proline rich and Gla domain 1 [Source:NCBI gene (formerly Entrezgene);Acc:785916]	PRRG1	-1.06659	-1.06686	4.61842	2.07e-05	0.000734532
ENSBTAG00000018563	510821	secreted frizzled related protein 2 [Source:VGNC Symbol;Acc:VGNC:34521]	SFRP2	-1.02426	-1.02426	10.2002	2.11e-05	0.000746365
ENSBTAG00000012046	514246	JunB proto-oncogene, AP-1 transcription factor subunit [Source:VGNC Symbol;Acc:VGNC:30387]	JUNB	1.99196	1.9951	4.1144	2.13e-05	0.000750677
ENSBTAG00000034529	618849	high mobility group AT-hook 1 [Source:VGNC Symbol;Acc:VGNC:29874]	HMGA1	1.24151	1.242	5.79986	2.15e-05	0.000753486
ENSBTAG00000010672	614302	propionyl-CoA carboxylase subunit alpha [Source:VGNC Symbol;Acc:VGNC:32613]	PCCA	-1.1073	-1.10774	3.80374	2.2e-05	0.000767447
ENSBTAG00000031335	614152	BRISC and BRCA1 A complex member 2 [Source:VGNC Symbol;Acc:VGNC:26399]	BABAM2	-1.00501	-1.00518	5.04973	2.2e-05	0.000767447
ENSBTAG00000020213	532275	NIPA like domain containing 4 [Source:VGNC Symbol;Acc:VGNC:32084]	NIPAL4	1.69426	1.69809	2.62181	2.23e-05	0.000777809
ENSBTAG00000009150	282866	spondin 1 [Source:VGNC Symbol;Acc:VGNC:35227]	SPON1	-3.04702	-3.1172	-1.14286	2.31e-05	0.000802171
ENSBTAG00000017249	525332	somatomedin B and thrombospondin type 1 domain containing [Source:VGNC Symbol;Acc:VGNC:34311]	SBSPON	1.07553	1.07609	4.38691	2.32e-05	0.000803716
ENSBTAG00000026247	100336824	PKHD1 like 1 [Source:NCBI gene (formerly Entrezgene);Acc:100336824]	PKHD1L1	-1.38654	-1.38876	1.85594	2.33e-05	0.000803716
ENSBTAG00000006017	526392	nuclear factor kappa B subunit 2 [Source:VGNC Symbol;Acc:VGNC:32044]	NFKB2	1.11345	1.11365	6.37255	2.34e-05	0.000805311
ENSBTAG00000038878	518393	aldehyde oxidase 1-like [Source:NCBI gene (formerly Entrezgene);Acc:518393]	AOX4	4.43054	4.61066	1.55565	2.35e-05	0.000807399
ENSBTAG00000016649	615414	cyclin D2 [Source:VGNC Symbol;Acc:VGNC:26963]	CCND2	1.43193	1.43356	3.54024	2.37e-05	0.000814161
ENSBTAG00000015511	515925	fatty acid desaturase 3 [Source:VGNC Symbol;Acc:VGNC:28703]	FADS3	1.53328	1.5336	6.00145	2.4e-05	0.00081915
ENSBTAG00000006189	404122	actin gamma 1 [Source:NCBI gene (formerly Entrezgene);Acc:404122]	ACTG1	0.917692	0.917695	11.8245	2.51e-05	0.000855314
ENSBTAG00000003809	540771	phospholipase C delta 4 [Source:VGNC Symbol;Acc:VGNC:32986]	PLCD4	-1.88279	-1.89583	0.176784	2.61e-05	0.000885739
ENSBTAG00000046838	#N/A	0	0	-1.82994	-1.83594	0.814549	2.61e-05	0.000885739
ENSBTAG00000043962	613556	solute carrier family 2 member 13 [Source:VGNC Symbol;Acc:VGNC:34799]	SLC2A13	-1.57636	-1.58178	0.764783	2.62e-05	0.000887305
ENSBTAG00000039090	514533	MAGE family member H1 [Source:VGNC Symbol;Acc:VGNC:31145]	MAGEH1	-0.979962	-0.980243	4.58312	2.68e-05	0.000903149
ENSBTAG00000047675	618268	sialic acid-binding Ig-like lectin 5 [Source:NCBI gene (formerly Entrezgene);Acc:618268]	0	2.21678	2.22776	1.80207	2.69e-05	0.000903149
ENSBTAG00000051832	#N/A	0	0	2.70349	2.7492	1.55512	2.69e-05	0.000903149
ENSBTAG00000015562	317710	phospholipase B domain containing 1 [Source:VGNC Symbol;Acc:VGNC:32978]	PLBD1	-1.07193	-1.07213	4.82593	2.7e-05	0.000903149
ENSBTAG00000021933	407169	arachidonate 12-lipoxygenase, 12S type [Source:VGNC Symbol;Acc:VGNC:25841]	ALOX12	2.37769	2.42135	1.22832	2.7e-05	0.000903149
ENSBTAG00000015197	532283	kelch domain containing 8A [Source:VGNC Symbol;Acc:VGNC:30639]	KLHDC8A	1.73705	1.745	1.92964	2.71e-05	0.000904316
ENSBTAG00000013955	533451	trafficking protein particle complex 9 [Source:VGNC Symbol;Acc:VGNC:36294]	TRAPPC9	-1.49596	-1.49692	3.09417	2.72e-05	0.000904597
ENSBTAG00000012113	506250	holocytochrome c synthase [Source:VGNC Symbol;Acc:VGNC:29770]	HCCS	0.93592	0.93615	5.63372	2.74e-05	0.000909466
ENSBTAG00000000357	533821	PEAK1 related, kinase-activating pseudokinase 1 [Source:NCBI gene (formerly Entrezgene);Acc:533821]	PRAG1	1.64695	1.64751	5.38256	2.8e-05	0.00092636
ENSBTAG00000019350	513423	solute carrier family 25 member 21 [Source:VGNC Symbol;Acc:VGNC:34749]	SLC25A21	-1.3275	-1.33197	0.802529	2.85e-05	0.000940057
ENSBTAG00000035998	516210	creatine kinase B [Source:VGNC Symbol;Acc:VGNC:27384]	CKB	1.44677	1.44794	3.9784	2.86e-05	0.000940766
ENSBTAG00000054881	534778	renalase, FAD dependent amine oxidase [Source:NCBI gene (formerly Entrezgene);Acc:534778]	RNLS	-1.23255	-1.23392	2.31051	2.94e-05	0.000964507
ENSBTAG00000002689	534611	NME/NM23 family member 7 [Source:VGNC Symbol;Acc:VGNC:32129]	NME7	-1.1371	-1.13742	4.35059	3e-05	0.000983022
ENSBTAG00000003313	520341	TNF receptor superfamily member 9 [Source:VGNC Symbol;Acc:VGNC:36171]	TNFRSF9	3.47234	3.64474	-0.0814635	3.04e-05	0.000993123
ENSBTAG00000037649	790124	vasoactive intestinal peptide receptor 2 [Source:VGNC Symbol;Acc:VGNC:36800]	VIPR2	-1.68301	-1.687	1.24786	3.12e-05	0.00101708
ENSBTAG00000004594	286794	matrix metallopeptidase 7 [Source:VGNC Symbol;Acc:VGNC:31529]	MMP7	2.64787	2.70994	0.153698	3.16e-05	0.00102636
ENSBTAG00000010877	540812	armadillo repeat containing 12 [Source:VGNC Symbol;Acc:VGNC:26156]	ARMC12	-1.70233	-1.70557	1.53334	3.2e-05	0.00103827
ENSBTAG00000007916	505891	forkhead box J1 [Source:VGNC Symbol;Acc:VGNC:29089]	FOXJ1	3.00204	3.08748	0.326281	3.22e-05	0.00104068
ENSBTAG00000013596	540528	nuclear receptor subfamily 1 group H member 4 [Source:VGNC Symbol;Acc:VGNC:32232]	NR1H4	-1.37313	-1.37434	2.54009	3.26e-05	0.00105024
ENSBTAG00000005716	493998	cellular retinoic acid binding protein 2 [Source:VGNC Symbol;Acc:VGNC:27686]	CRABP2	1.6775	1.69001	1.34986	3.32e-05	0.00106767
ENSBTAG00000049001	#N/A	0	0	-1.55689	-1.55952	1.8586	3.33e-05	0.0010692
ENSBTAG00000000220	#N/A	NIMA related kinase 10 [Source:VGNC Symbol;Acc:VGNC:31992]	NEK10	-1.52681	-1.53429	0.272889	3.38e-05	0.00108311
ENSBTAG00000001183	100141057	kelch like family member 33 [Source:VGNC Symbol;Acc:VGNC:30659]	KLHL33	-2.40786	-2.44994	-1.04814	3.45e-05	0.00110282
ENSBTAG00000015080	515071	phosphatase and actin regulator 3 [Source:VGNC Symbol;Acc:VGNC:57015]	PHACTR3	1.50312	1.50972	1.42855	3.63e-05	0.00115314
ENSBTAG00000008143	513665	serine/threonine kinase 17a [Source:VGNC Symbol;Acc:VGNC:53673]	STK17A	1.13396	1.13417	6.12959	3.63e-05	0.00115314
ENSBTAG00000012216	790225	mixed lineage kinase domain like pseudokinase [Source:VGNC Symbol;Acc:VGNC:31500]	MLKL	1.0316	1.03217	4.51324	3.67e-05	0.00116279
ENSBTAG00000043548	#N/A	0	0	-2.43196	-2.45895	-0.614985	3.79e-05	0.00119615
ENSBTAG00000007307	281484	selectin E [Source:VGNC Symbol;Acc:VGNC:34421]	SELE	3.44781	3.61988	1.21179	3.79e-05	0.00119615
ENSBTAG00000050000	#N/A	0	0	-1.43525	-1.43553	4.66882	3.9e-05	0.00122645
ENSBTAG00000003653	537667	Ly1 antibody reactive [Source:VGNC Symbol;Acc:VGNC:31095]	LYAR	0.961465	0.961679	5.77309	3.94e-05	0.00123518
ENSBTAG00000014564	533703	xyloside xylosyltransferase 1 [Source:VGNC Symbol;Acc:VGNC:53613]	XXYLT1	-1.03492	-1.03515	4.59983	3.95e-05	0.00123518
ENSBTAG00000045925	282182	Cbp/p300 interacting transactivator with Glu/Asp rich carboxy-terminal domain 1 [Source:VGNC Symbol;Acc:VGNC:27376]	CITED1	-1.90309	-1.90821	1.18633	3.95e-05	0.00123518
ENSBTAG00000054383	616931	nudix (nucleoside diphosphate linked moiety X)-type motif 10 [Source:NCBI gene (formerly Entrezgene);Acc:616931]	NUDT10	3.37968	3.43321	1.21545	3.98e-05	0.0012411
ENSBTAG00000018164	781806	fibronectin type III domain containing 4 [Source:VGNC Symbol;Acc:VGNC:29064]	FNDC4	1.1902	1.19132	3.28714	4.05e-05	0.00125968
ENSBTAG00000006044	528668	kelch like family member 5 [Source:VGNC Symbol;Acc:VGNC:30668]	KLHL5	-1.10276	-1.10312	4.0635	4.1e-05	0.0012703
ENSBTAG00000005633	616969	Rho guanine nucleotide exchange factor 28 [Source:VGNC Symbol;Acc:VGNC:26114]	ARHGEF28	-0.963828	-0.964173	4.33551	4.11e-05	0.0012703
ENSBTAG00000039711	538928	ZFP62 zinc finger protein [Source:VGNC Symbol;Acc:VGNC:37166]	ZFP62	-1.27299	-1.27388	3.15382	4.12e-05	0.0012703
ENSBTAG00000017271	540206	microtubule associated serine/threonine kinase like [Source:VGNC Symbol;Acc:VGNC:31260]	MASTL	1.03619	1.03633	6.2953	4.16e-05	0.00128108
ENSBTAG00000009258	614924	NIMA related kinase 11 [Source:VGNC Symbol;Acc:VGNC:53591]	NEK11	-2.97926	-3.04897	-1.16647	4.24e-05	0.00130121
ENSBTAG00000054069	100141268	cornulin [Source:NCBI gene (formerly Entrezgene);Acc:100141268]	CRNN	2.21172	2.22175	1.82529	4.27e-05	0.00130736
ENSBTAG00000039337	100295883	docosahexaenoic acid omega-hydroxylase CYP4F3 [Source:NCBI gene (formerly Entrezgene);Acc:100295883]	0	1.9132	1.92452	1.43112	4.3e-05	0.00131571
ENSBTAG00000016847	538936	ADP ribosylation factor like GTPase 4D [Source:VGNC Symbol;Acc:VGNC:26146]	ARL4D	-0.907335	-0.907468	5.34961	4.34e-05	0.0013229
ENSBTAG00000038384	281268	keratin 5 [Source:VGNC Symbol;Acc:VGNC:50405]	KRT5	1.25093	1.25296	2.60568	4.35e-05	0.0013229
ENSBTAG00000007773	282118	vascular cell adhesion molecule 1 [Source:NCBI gene (formerly Entrezgene);Acc:282118]	VCAM1	-3.22948	-3.30943	-1.03465	4.36e-05	0.0013229
ENSBTAG00000010798	505492	solute carrier family 23 member 1 [Source:VGNC Symbol;Acc:VGNC:34733]	SLC23A1	1.77898	1.78164	2.99282	4.37e-05	0.00132533
ENSBTAG00000003432	530271	zonadhesin [Source:VGNC Symbol;Acc:VGNC:99806]	ZAN	2.65004	2.6999	0.728639	4.43e-05	0.00133862
ENSBTAG00000031778	519935	H2B clustered histone 5 [Source:VGNC Symbol;Acc:VGNC:83560]	H2BC5	-1.81712	-1.8283	0.26304	4.48e-05	0.00135088
ENSBTAG00000051882	616962	chromosome 16 C1orf105 homolog [Source:NCBI gene (formerly Entrezgene);Acc:616962]	C16H1orf105	-1.67703	-1.68798	-0.00529875	4.59e-05	0.00138001
ENSBTAG00000012405	787112	platelet endothelial aggregation receptor 1 [Source:VGNC Symbol;Acc:VGNC:32734]	PEAR1	1.24961	1.25029	4.31555	4.63e-05	0.00138985
ENSBTAG00000008320	615408	septin 5 [Source:VGNC Symbol;Acc:VGNC:53921]	SEPTIN5	1.41808	1.41871	4.77249	4.64e-05	0.00138985
ENSBTAG00000030881	614796	transmembrane protein 260 [Source:VGNC Symbol;Acc:VGNC:36069]	TMEM260	-0.940565	-0.940701	5.32354	4.7e-05	0.00140433
ENSBTAG00000004066	511595	poly(ADP-ribose) polymerase family member 8 [Source:NCBI gene (formerly Entrezgene);Acc:511595]	PARP8	-0.921374	-0.921563	5.00952	4.85e-05	0.00144721
ENSBTAG00000018497	532333	caveolae associated protein 2 [Source:VGNC Symbol;Acc:VGNC:26803]	CAVIN2	1.51673	1.51733	5.32507	5.05e-05	0.00150147
ENSBTAG00000016784	517781	dynein axonemal heavy chain 7 [Source:VGNC Symbol;Acc:VGNC:50052]	DNAH7	-1.56258	-1.56953	0.404319	5.14e-05	0.00152455
ENSBTAG00000006797	520348	membrane associated ring-CH-type finger 3 [Source:VGNC Symbol;Acc:VGNC:31239]	MARCHF3	1.04578	1.04623	4.86611	5.24e-05	0.00155066
ENSBTAG00000019592	541084	methyl-CpG binding domain protein 5 [Source:VGNC Symbol;Acc:VGNC:31277]	MBD5	-0.964493	-0.964754	4.37418	5.33e-05	0.0015729
ENSBTAG00000003165	537051	ADAM metallopeptidase with thrombospondin type 1 motif 9 [Source:VGNC Symbol;Acc:VGNC:25630]	ADAMTS9	-1.09682	-1.09689	6.40085	5.34e-05	0.0015729
ENSBTAG00000011182	614675	PDZ and LIM domain 1 [Source:VGNC Symbol;Acc:VGNC:32707]	PDLIM1	0.87667	0.876697	8.42733	5.38e-05	0.00158079
ENSBTAG00000047930	784326	ubiquitin conjugating enzyme E2 E2 [Source:NCBI gene (formerly Entrezgene);Acc:784326]	UBE2E2	-1.39641	-1.39803	2.28056	5.42e-05	0.00159068
ENSBTAG00000006972	506746	thyroid hormone receptor interactor 13 [Source:VGNC Symbol;Acc:VGNC:36359]	TRIP13	0.968188	0.968336	6.19805	5.44e-05	0.00159233
ENSBTAG00000002188	618703	chromosome 25 C16orf89 homolog [Source:VGNC Symbol;Acc:VGNC:58591]	C25H16orf89	2.95982	2.99971	2.41878	5.46e-05	0.00159379
ENSBTAG00000002313	281878	inositol 1,4,5-trisphosphate receptor type 2 [Source:VGNC Symbol;Acc:VGNC:30347]	ITPR2	-1.31116	-1.31163	3.88902	5.59e-05	0.00162997
ENSBTAG00000007605	508535	FKBP prolyl isomerase 4 [Source:VGNC Symbol;Acc:VGNC:29023]	FKBP4	0.986119	0.986223	6.82427	5.66e-05	0.00164636
ENSBTAG00000020802	100847355	dynein axonemal heavy chain 12 [Source:NCBI gene (formerly Entrezgene);Acc:100847355]	DNAH12	-1.23044	-1.23195	2.1571	5.67e-05	0.00164636
ENSBTAG00000002430	513804	collagen type XVII alpha 1 chain [Source:VGNC Symbol;Acc:VGNC:27558]	COL17A1	2.60481	2.60544	6.35762	5.76e-05	0.00166825
ENSBTAG00000045498	531192	sulfotransferase family 2B member 1 [Source:VGNC Symbol;Acc:VGNC:35468]	SULT2B1	-1.93202	-1.94353	0.202673	5.87e-05	0.00169433
ENSBTAG00000055281	100848357	uncharacterized LOC100848357 [Source:NCBI gene (formerly Entrezgene);Acc:100848357]	0	-1.21671	-1.21806	2.41736	5.91e-05	0.00170467
ENSBTAG00000020233	535781	coiled-coil domain containing 186 [Source:VGNC Symbol;Acc:VGNC:26881]	CCDC186	-0.974872	-0.974996	5.58906	5.94e-05	0.00170947
ENSBTAG00000043577	3283886	NADH dehydrogenase subunit 4 [Source:NCBI gene (formerly Entrezgene);Acc:3283886]	ND4	-0.987635	-0.987637	11.8082	5.97e-05	0.00171269
ENSBTAG00000000182	507484	serine peptidase inhibitor, Kunitz type 2 [Source:VGNC Symbol;Acc:VGNC:49973]	SPINT2	-0.896317	-0.896377	6.41417	6.02e-05	0.0017229
ENSBTAG00000009617	282356	solute carrier family 2 member 1 [Source:VGNC Symbol;Acc:VGNC:34796]	SLC2A1	1.27926	1.28185	2.71762	6.06e-05	0.00173007
ENSBTAG00000050389	#N/A	0	0	-2.30726	-2.35535	-1.23354	6.33e-05	0.0018049
ENSBTAG00000039050	282638	purinergic receptor P2Y2 [Source:VGNC Symbol;Acc:VGNC:32528]	P2RY2	1.39138	1.39225	4.66456	6.37e-05	0.00181131
ENSBTAG00000035437	539234	stromal antigen 1 [Source:VGNC Symbol;Acc:VGNC:35353]	STAG1	-0.99429	-0.994452	5.11402	6.59e-05	0.00186972
ENSBTAG00000007783	510420	MYB proto-oncogene like 2 [Source:VGNC Symbol;Acc:VGNC:31779]	MYBL2	1.42193	1.42206	7.03236	6.63e-05	0.00187872
ENSBTAG00000004720	535166	sulfatase 1 [Source:VGNC Symbol;Acc:VGNC:53880]	SULF1	-0.974037	-0.974095	6.54954	6.72e-05	0.00189984
ENSBTAG00000009972	281254	inhibin subunit alpha [Source:VGNC Symbol;Acc:VGNC:30199]	INHA	3.47825	3.65068	-0.713485	6.74e-05	0.00189984
ENSBTAG00000023947	614488	arginine vasopressin induced 1 [Source:VGNC Symbol;Acc:VGNC:26357]	AVPI1	1.33105	1.33186	4.402	6.8e-05	0.00191252
ENSBTAG00000043948	538255	hyperpolarization activated cyclic nucleotide gated potassium channel 1 [Source:VGNC Symbol;Acc:VGNC:29776]	HCN1	-1.88898	-1.90113	0.270303	6.87e-05	0.00192819
ENSBTAG00000016484	529689	ATPase phospholipid transporting 11C [Source:VGNC Symbol;Acc:VGNC:26275]	ATP11C	-1.07991	-1.08047	3.48274	7.02e-05	0.0019663
ENSBTAG00000012004	538957	transforming growth factor beta 3 [Source:VGNC Symbol;Acc:VGNC:35803]	TGFB3	-1.08498	-1.08525	4.6587	7.04e-05	0.00196719
ENSBTAG00000052352	#N/A	0	0	2.87913	2.97982	-0.0929149	7.05e-05	0.00196719
ENSBTAG00000003074	529171	solute carrier family 16 member 6 [Source:VGNC Symbol;Acc:VGNC:34692]	SLC16A6	1.49798	1.50131	2.90977	7.09e-05	0.00196845
ENSBTAG00000009125	507093	aldehyde dehydrogenase 1 family member A3 [Source:VGNC Symbol;Acc:VGNC:59168]	ALDH1A3	-1.07447	-1.07456	6.31917	7.11e-05	0.00196845
ENSBTAG00000000401	618203	tetratricopeptide repeat domain 24 [Source:VGNC Symbol;Acc:VGNC:36463]	TTC24	3.26379	3.39296	-0.536613	7.12e-05	0.00196845
ENSBTAG00000018236	530941	erythrocyte membrane protein band 4.1 like 5 [Source:VGNC Symbol;Acc:VGNC:28525]	EPB41L5	-1.1238	-1.12433	3.85963	7.12e-05	0.00196845
ENSBTAG00000025748	507016	cytochrome P450, family 4, subfamily F, polypeptide 2 [Source:NCBI gene (formerly Entrezgene);Acc:507016]	CYP4F2	3.63447	3.80847	1.05688	7.13e-05	0.00196845
ENSBTAG00000049306	618441	methionine sulfoxide reductase B1 [Source:NCBI gene (formerly Entrezgene);Acc:618441]	MSRB1	1.32055	1.32071	6.53719	7.45e-05	0.00205153
ENSBTAG00000006939	512950	FYVE, RhoGEF and PH domain containing 3 [Source:VGNC Symbol;Acc:VGNC:28966]	FGD3	1.9244	1.93741	0.995123	7.48e-05	0.0020528
ENSBTAG00000005110	519444	calcium dependent secretion activator 2 [Source:VGNC Symbol;Acc:VGNC:26699]	CADPS2	-3.06356	-3.15329	-1.48722	7.49e-05	0.0020528
ENSBTAG00000015347	539337	Wnt family member 10B [Source:VGNC Symbol;Acc:VGNC:56232]	WNT10B	1.12772	1.12924	3.01343	7.6e-05	0.00207988
ENSBTAG00000000815	512798	EPH receptor A2 [Source:VGNC Symbol;Acc:VGNC:28534]	EPHA2	1.25283	1.25296	7.17436	7.65e-05	0.0020893
ENSBTAG00000038662	508454	gap junction protein beta 6 [Source:VGNC Symbol;Acc:VGNC:29381]	GJB6	2.58375	2.5942	2.09558	7.76e-05	0.00211476
ENSBTAG00000007181	539231	kinesin family member C3 [Source:VGNC Symbol;Acc:VGNC:30613]	KIFC3	1.48285	1.48374	4.60752	7.8e-05	0.00212139
ENSBTAG00000013764	404034	opticin [Source:VGNC Symbol;Acc:VGNC:32441]	OPTC	-2.70007	-2.75563	-1.18079	7.86e-05	0.00213104
ENSBTAG00000048114	100848331	retinoic acid early transcript 1E-like [Source:NCBI gene (formerly Entrezgene);Acc:100848331]	0	1.29354	1.29455	4.12864	7.88e-05	0.00213104
ENSBTAG00000053433	112443864	MHC class I polypeptide-related sequence B-like [Source:NCBI gene (formerly Entrezgene);Acc:112443864]	0	1.88087	1.90269	0.921089	7.88e-05	0.00213104
ENSBTAG00000016650	615392	TP53 induced glycolysis regulatory phosphatase [Source:VGNC Symbol;Acc:VGNC:35863]	TIGAR	1.05599	1.05675	3.99552	7.93e-05	0.00213486
ENSBTAG00000050737	#N/A	0	0	3.11143	3.35631	-0.279084	7.93e-05	0.00213486
ENSBTAG00000013085	281752	chymotrypsin-like elastase family, member 3B [Source:NCBI gene (formerly Entrezgene);Acc:281752]	CELA3B	4.38525	4.64727	0.0621547	8.11e-05	0.0021778
ENSBTAG00000010727	615657	autophagy related 4D cysteine peptidase [Source:VGNC Symbol;Acc:VGNC:26260]	ATG4D	1.54329	1.54403	5.13371	8.13e-05	0.00217943
ENSBTAG00000004155	511363	spermatogenesis associated 20 [Source:VGNC Symbol;Acc:VGNC:35179]	SPATA20	1.27725	1.27744	6.71431	8.23e-05	0.0022012
ENSBTAG00000001618	516866	alpha kinase 3 [Source:VGNC Symbol;Acc:VGNC:25849]	ALPK3	1.31169	1.31296	3.63146	8.26e-05	0.00220551
ENSBTAG00000014560	519165	H2.0 like homeobox [Source:VGNC Symbol;Acc:VGNC:50277]	HLX	-1.22771	-1.22852	3.08646	8.3e-05	0.00221034
ENSBTAG00000000942	535132	signal induced proliferation associated 1 like 2 [Source:VGNC Symbol;Acc:VGNC:34629]	SIPA1L2	-1.2851	-1.28698	1.74425	8.35e-05	0.00222076
ENSBTAG00000009942	510408	phospholipase C like 2 [Source:VGNC Symbol;Acc:VGNC:32992]	PLCL2	-1.5065	-1.50949	1.36839	8.4e-05	0.00222991
ENSBTAG00000008228	504789	BEN domain containing 6 [Source:VGNC Symbol;Acc:VGNC:26469]	BEND6	-2.17504	-2.20087	-0.726587	8.51e-05	0.00225307
ENSBTAG00000003018	515367	follistatin like 3 [Source:VGNC Symbol;Acc:VGNC:29136]	FSTL3	1.38011	1.3802	7.54967	8.55e-05	0.00225944
ENSBTAG00000007417	540517	growth differentiation factor 11 [Source:VGNC Symbol;Acc:VGNC:29300]	GDF11	1.70754	1.71771	1.58667	8.58e-05	0.00226138
ENSBTAG00000006703	515331	prostaglandin D2 receptor [Source:VGNC Symbol;Acc:VGNC:33499]	PTGDR	1.34975	1.35185	3.49565	8.71e-05	0.00229242
ENSBTAG00000023416	787607	protein phosphatase 2 regulatory subunit B''alpha [Source:VGNC Symbol;Acc:VGNC:33258]	PPP2R3A	-1.03317	-1.0333	5.51219	8.82e-05	0.00231523
ENSBTAG00000008331	509773	transmembrane protein 54 [Source:VGNC Symbol;Acc:VGNC:36097]	TMEM54	1.49127	1.49795	1.48026	8.87e-05	0.00232611
ENSBTAG00000054953	#N/A	0	0	3.28947	3.41891	-0.0906538	8.91e-05	0.00233124
ENSBTAG00000021210	516433	hes family bHLH transcription factor 2 [Source:VGNC Symbol;Acc:VGNC:29819]	HES2	1.19309	1.19339	5.82227	8.95e-05	0.00233548
ENSBTAG00000005198	281160	fibroblast growth factor 1 [Source:VGNC Symbol;Acc:VGNC:28970]	FGF1	1.11231	1.11369	2.88268	9.01e-05	0.00234549
ENSBTAG00000040053	100296004	myosin heavy chain 6 [Source:VGNC Symbol;Acc:VGNC:55126]	MYH6	2.13704	2.16271	0.583096	9.02e-05	0.00234549
ENSBTAG00000005260	281499	secreted phosphoprotein 1 [Source:VGNC Symbol;Acc:VGNC:35232]	SPP1	1.91104	1.91146	6.95062	9.05e-05	0.00234826
ENSBTAG00000001279	509346	membrane palmitoylated protein 2 [Source:VGNC Symbol;Acc:VGNC:31583]	MPP2	1.60548	1.60868	2.81894	9.07e-05	0.00234826
ENSBTAG00000003496	614409	androgen induced 1 [Source:VGNC Symbol;Acc:VGNC:25764]	AIG1	-1.52116	-1.52529	1.06569	9.14e-05	0.00236346
ENSBTAG00000045835	112442653	homeobox B5 [Source:VGNC Symbol;Acc:VGNC:58381]	HOXB5	-1.29638	-1.29921	1.46692	9.21e-05	0.00237415
ENSBTAG00000053478	112449602	uncharacterized LOC112449602 [Source:NCBI gene (formerly Entrezgene);Acc:112449602]	0	-1.20102	-1.20211	2.74457	9.22e-05	0.00237415
ENSBTAG00000000582	512743	lymphocyte antigen 6 complex, locus G6E [Source:NCBI gene (formerly Entrezgene);Acc:512743]	LY6G6E	1.06151	1.06189	5.1155	9.5e-05	0.00244023
ENSBTAG00000048257	534967	leukotriene-B(4) omega-hydroxylase 2-like [Source:NCBI gene (formerly Entrezgene);Acc:534967]	0	1.56945	1.57113	3.81284	9.53e-05	0.00244438
ENSBTAG00000016305	521728	ATPase 13A4 [Source:VGNC Symbol;Acc:VGNC:26280]	ATP13A4	1.25199	1.2539	2.62642	9.75e-05	0.00249264
ENSBTAG00000010236	528834	cell death inducing DFFA like effector b [Source:VGNC Symbol;Acc:VGNC:27364]	CIDEB	1.73914	1.74849	2.08107	9.76e-05	0.00249264
ENSBTAG00000011437	100337254	salt inducible kinase 1 [Source:NCBI gene (formerly Entrezgene);Acc:100337254]	0	1.1138	1.11407	5.8132	9.88e-05	0.00251644
ENSBTAG00000019062	539601	FCH and double SH3 domains 2 [Source:VGNC Symbol;Acc:VGNC:28937]	FCHSD2	-0.992145	-0.992442	4.24563	9.89e-05	0.00251644
ENSBTAG00000026384	616037	zygote arrest 1 like [Source:NCBI gene (formerly Entrezgene);Acc:616037]	ZAR1L	-1.32392	-1.32681	1.53648	0.000100902	0.00256229
ENSBTAG00000007431	519047	cell migration inducing hyaluronidase 1 [Source:VGNC Symbol;Acc:VGNC:27172]	CEMIP	1.32834	1.32878	5.03059	0.000102259	0.00259168
ENSBTAG00000049392	104968444	tumor necrosis factor receptor superfamily member 10B-like [Source:NCBI gene (formerly Entrezgene);Acc:104968444]	0	1.14901	1.14974	4.37072	0.000103157	0.00260716
ENSBTAG00000017602	510305	transmembrane protein 45B [Source:VGNC Symbol;Acc:VGNC:36089]	TMEM45B	2.10032	2.12577	0.954248	0.00010327	0.00260716
ENSBTAG00000000477	444870	toll like receptor 5 [Source:VGNC Symbol;Acc:VGNC:52835]	TLR5	-2.03187	-2.06085	-0.991769	0.000103786	0.00261514
ENSBTAG00000018774	518632	0	0	0.974745	0.974901	6.16695	0.000104625	0.00263117
ENSBTAG00000015700	539782	ELOVL fatty acid elongase 3 [Source:VGNC Symbol;Acc:VGNC:28449]	ELOVL3	4.14018	4.62008	-0.450583	0.000108775	0.00273026
ENSBTAG00000048950	510707	Bos taurus UL16-binding protein 15 (ULBP15), mRNA. [Source:RefSeq mRNA;Acc:NM_001168611]	ULBP13	1.14774	1.14886	3.90349	0.000109503	0.00274327
ENSBTAG00000014878	338086	cytochrome c oxidase subunit 7A1 [Source:VGNC Symbol;Acc:VGNC:27639]	COX7A1	-1.31243	-1.316	1.17614	0.000116865	0.00292208
ENSBTAG00000010402	404108	myosin heavy chain 9 [Source:VGNC Symbol;Acc:VGNC:31798]	MYH9	1.08913	1.08914	9.98822	0.000118135	0.00294816
ENSBTAG00000008366	536456	SH3 and cysteine rich domain 2 [Source:VGNC Symbol;Acc:VGNC:35351]	STAC2	2.28615	2.29517	2.71841	0.000119116	0.00296698
ENSBTAG00000014960	535716	schwannomin interacting protein 1 [Source:NCBI gene (formerly Entrezgene);Acc:535716]	SCHIP1	1.00342	1.00365	5.39557	0.000120263	0.00298982
ENSBTAG00000014027	539023	tripartite motif containing 36 [Source:VGNC Symbol;Acc:VGNC:36331]	TRIM36	1.36073	1.36427	3.03364	0.000121092	0.00300471
ENSBTAG00000000283	281094	colony stimulating factor 1 [Source:VGNC Symbol;Acc:VGNC:27753]	CSF1	1.13593	1.13602	7.10891	0.000121455	0.00300729
ENSBTAG00000013439	531741	Rho guanine nucleotide exchange factor 26 [Source:VGNC Symbol;Acc:VGNC:26113]	ARHGEF26	-1.11849	-1.11893	3.74507	0.000121658	0.00300729
ENSBTAG00000003144	617013	KIAA0825 [Source:VGNC Symbol;Acc:VGNC:30556]	KIAA0825	-1.26706	-1.26842	2.64083	0.00012272	0.00302779
ENSBTAG00000022751	789632	zinc finger CW-type and PWWP domain containing 2 [Source:NCBI gene (formerly Entrezgene);Acc:789632]	0	-1.92173	-1.94512	-0.77887	0.000126765	0.00312167
ENSBTAG00000030189	#N/A	EF-hand calcium binding domain 6 [Source:VGNC Symbol;Acc:VGNC:28346]	EFCAB6	-1.64684	-1.65995	-0.158095	0.000128328	0.0031542
ENSBTAG00000001335	280805	growth hormone receptor [Source:VGNC Symbol;Acc:VGNC:50184]	GHR	-1.16147	-1.16176	4.43616	0.000129137	0.00316811
ENSBTAG00000013909	512018	BOC cell adhesion associated, oncogene regulated [Source:VGNC Symbol;Acc:VGNC:26536]	BOC	-1.28083	-1.28143	3.58153	0.00013706	0.00335617
ENSBTAG00000001444	282654	tenascin XB [Source:VGNC Symbol;Acc:VGNC:36211]	TNXB	1.54561	1.54577	6.59594	0.000137484	0.00336022
ENSBTAG00000003871	504769	cytochrome P450 subfamily 2B [Source:NCBI gene (formerly Entrezgene);Acc:504769]	CYP2B6	-1.50853	-1.51407	0.554971	0.000139441	0.00339763
ENSBTAG00000051116	100295626	chromosome 23 C6orf132 homolog [Source:VGNC Symbol;Acc:VGNC:53962]	C23H6orf132	1.76723	1.78418	1.51217	0.000139536	0.00339763
ENSBTAG00000003014	507664	transient receptor potential cation channel subfamily V member 2 [Source:VGNC Symbol;Acc:VGNC:36398]	TRPV2	2.40664	2.48604	-0.513656	0.000140387	0.00340669
ENSBTAG00000019665	281860	interleukin 1 receptor antagonist [Source:VGNC Symbol;Acc:VGNC:30136]	IL1RN	1.71637	1.72335	1.61521	0.000140431	0.00340669
ENSBTAG00000011446	614707	semaphorin 7A [Source:VGNC Symbol;Acc:VGNC:53952]	SEMA7A	1.52504	1.52882	2.0865	0.00014267	0.00345457
ENSBTAG00000046980	100848657	killer cell lectin like receptor F2 [Source:VGNC Symbol;Acc:VGNC:30686]	KLRF2	4.92771	144269482	-0.759229	0.000143765	0.00346967
ENSBTAG00000043559	3283885	NADH dehydrogenase subunit 4L [Source:NCBI gene (formerly Entrezgene);Acc:3283885]	ND4L	-0.996707	-0.996721	8.6056	0.000143826	0.00346967
ENSBTAG00000017067	513878	BUD23 rRNA methyltransferase and ribosome maturation factor [Source:VGNC Symbol;Acc:VGNC:26608]	BUD23	0.888896	0.888983	6.90253	0.000145333	0.00349953
ENSBTAG00000026025	519208	fibronectin type III domain containing protein 3C1 [Source:NCBI gene (formerly Entrezgene);Acc:519208]	0	-2.47545	-2.51519	-1.03499	0.000152076	0.00365514
ENSBTAG00000018010	281584	ATP binding cassette subfamily A member 4 [Source:VGNC Symbol;Acc:VGNC:25458]	ABCA4	-1.09126	-1.09242	2.58465	0.000152681	0.00366294
ENSBTAG00000052443	#N/A	0	0	1.94962	1.9582	1.76176	0.000154368	0.0036966
ENSBTAG00000002888	100337258	transmembrane O-mannosyltransferase targeting cadherins 2 [Source:VGNC Symbol;Acc:VGNC:58451]	TMTC2	-1.06518	-1.0654	4.95189	0.000154869	0.00370035
ENSBTAG00000016514	280753	carboxypeptidase E [Source:VGNC Symbol;Acc:VGNC:27648]	CPE	-0.955073	-0.955089	8.38468	0.000155093	0.00370035
ENSBTAG00000031575	521961	vav guanine nucleotide exchange factor 3 [Source:VGNC Symbol;Acc:VGNC:36774]	VAV3	-1.07705	-1.07738	4.17393	0.000159033	0.00378742
ENSBTAG00000021490	508051	WD repeat domain 4 [Source:VGNC Symbol;Acc:VGNC:36897]	WDR4	1.27813	1.2801	3.14289	0.000160431	0.00381348
ENSBTAG00000002464	514590	phospholipase C eta 2 [Source:VGNC Symbol;Acc:VGNC:32991]	PLCH2	2.0556	2.05672	4.74844	0.000160712	0.00381348
ENSBTAG00000010135	507694	plasmanylethanolamine desaturase 1 [Source:VGNC Symbol;Acc:VGNC:57030]	PEDS1	1.13444	1.13457	6.42706	0.00016146	0.00382425
ENSBTAG00000011245	518168	plexin C1 [Source:VGNC Symbol;Acc:VGNC:33064]	PLXNC1	-2.14074	-2.18084	-1.14624	0.000162757	0.00384172
ENSBTAG00000011964	519222	DIS3 like 3'-5' exoribonuclease 2 [Source:VGNC Symbol;Acc:VGNC:28074]	DIS3L2	-0.9768	-0.97731	3.34367	0.000162787	0.00384172
ENSBTAG00000019876	281127	desmocollin 1 [Source:VGNC Symbol;Acc:VGNC:28212]	DSC1	-2.27214	-2.29968	-0.761413	0.000164992	0.00388672
ENSBTAG00000047059	509797	translocase of inner mitochondrial membrane 17A [Source:VGNC Symbol;Acc:VGNC:49572]	TIMM17A	0.957637	0.957892	5.46403	0.000166428	0.00391347
ENSBTAG00000009127	508104	TSPY like 4 [Source:VGNC Symbol;Acc:VGNC:36446]	TSPYL4	-0.942477	-0.942566	6.02746	0.000171519	0.00402592
ENSBTAG00000048367	#N/A	0	0	-1.7318	-1.74526	-0.255458	0.000175885	0.00412095
ENSBTAG00000031354	#N/A	0	0	3.60235	3.77606	-0.579256	0.00017679	0.00413473
ENSBTAG00000014791	539159	cystathionine gamma-lyase [Source:VGNC Symbol;Acc:VGNC:27795]	CTH	1.0121	1.01259	4.49199	0.000178212	0.00416052
ENSBTAG00000002951	513468	CD244 molecule [Source:VGNC Symbol;Acc:VGNC:27015]	CD244	1.76072	1.77187	2.27845	0.000178684	0.00416408
ENSBTAG00000034393	512887	family with sequence similarity 149 member A [Source:VGNC Symbol;Acc:VGNC:55045]	FAM149A	0.990825	0.991717	3.63931	0.000179537	0.00417649
ENSBTAG00000004894	505013	GTPase, IMAP family member 5 [Source:NCBI gene (formerly Entrezgene);Acc:505013]	GIMAP5	2.15554	2.20159	-0.116774	0.000180231	0.00418516
ENSBTAG00000000928	506538	sperm antigen with calponin homology and coiled-coil domains 1 [Source:VGNC Symbol;Acc:VGNC:35200]	SPECC1	1.06618	1.06673	4.23207	0.000181733	0.00421252
ENSBTAG00000051083	789600	Wnt family member 4 [Source:VGNC Symbol;Acc:VGNC:36959]	WNT4	-1.33711	-1.33772	3.7379	0.00018581	0.00429938
ENSBTAG00000016471	286844	pyruvate dehydrogenase phosphatase regulatory subunit [Source:VGNC Symbol;Acc:VGNC:32715]	PDPR	-1.00147	-1.00174	4.46113	0.000188565	0.00434969
ENSBTAG00000034875	524375	alpha kinase 1 [Source:VGNC Symbol;Acc:VGNC:25847]	ALPK1	-1.01348	-1.01414	3.05306	0.000188653	0.00434969
ENSBTAG00000013300	282573	potassium calcium-activated channel subfamily M alpha 1 [Source:VGNC Symbol;Acc:VGNC:30479]	KCNMA1	-1.14125	-1.1416	4.21184	0.000190848	0.00439253
ENSBTAG00000012022	535927	TBC1 domain family member 2B [Source:VGNC Symbol;Acc:VGNC:35640]	TBC1D2B	-0.939606	-0.939658	6.66179	0.000191828	0.0044073
ENSBTAG00000007436	613919	gamma-glutamyltransferase 6 [Source:VGNC Symbol;Acc:VGNC:29345]	GGT6	1.4688	1.47224	2.20064	0.000194661	0.00446305
ENSBTAG00000005069	282384	transmembrane 7 superfamily member 2 [Source:VGNC Symbol;Acc:VGNC:35910]	TM7SF2	1.32853	1.3291	5.41922	0.000194939	0.00446305
ENSBTAG00000019349	282365	solute carrier family 6 member 4 [Source:VGNC Symbol;Acc:VGNC:49971]	SLC6A4	-1.56382	-1.57316	0.0337339	0.000198399	0.00453428
ENSBTAG00000021547	521560	cilia and flagella associated protein 57 [Source:VGNC Symbol;Acc:VGNC:54907]	CFAP57	1.64209	1.64702	1.99494	0.000200578	0.00457606
ENSBTAG00000015436	514427	solute carrier family 27 member 4 [Source:VGNC Symbol;Acc:VGNC:34788]	SLC27A4	1.35139	1.35362	3.37011	0.000205463	0.0046774
ENSBTAG00000000011	511957	L-threonine dehydrogenase [Source:NCBI gene (formerly Entrezgene);Acc:511957]	TDH	2.22324	2.30018	-0.220286	0.000205913	0.0046774
ENSBTAG00000005104	785213	alpha-1,6-mannosylglycoprotein 6-beta-N-acetylglucosaminyltransferase B [Source:VGNC Symbol;Acc:VGNC:55847]	MGAT5B	2.17943	2.18256	3.69237	0.000206097	0.0046774
ENSBTAG00000008877	515571	amyloid beta precursor protein binding family A member 1 [Source:VGNC Symbol;Acc:VGNC:26000]	APBA1	-1.78648	-1.80507	-0.597721	0.000209837	0.00475401
ENSBTAG00000049346	100336941	carcinoembryonic antigen-related cell adhesion molecule 4 [Source:NCBI gene (formerly Entrezgene);Acc:100336941]	0	4.61972	5.10653	0.135164	0.000210635	0.0047638
ENSBTAG00000040512	100126444	Purkinje cell protein 4 like 1 [Source:VGNC Symbol;Acc:VGNC:32645]	PCP4L1	1.78703	1.79266	2.0983	0.000212293	0.00479297
ENSBTAG00000020569	282608	calcium voltage-gated channel auxiliary subunit alpha2delta 1 [Source:VGNC Symbol;Acc:VGNC:26679]	CACNA2D1	-1.19726	-1.19782	3.52971	0.000216511	0.00487975
ENSBTAG00000005915	528635	Scm like with four mbt domains 2 [Source:VGNC Symbol;Acc:VGNC:34516]	SFMBT2	-1.73118	-1.7434	-0.142584	0.000218282	0.00491116
ENSBTAG00000000500	525027	PIN2 (TERF1) interacting telomerase inhibitor 1 [Source:VGNC Symbol;Acc:VGNC:32905]	PINX1	0.969242	0.970168	3.59281	0.000220796	0.00495916
ENSBTAG00000053114	107132283	endogenous retrovirus group K member 113 Env polyprotein-like [Source:NCBI gene (formerly Entrezgene);Acc:107132283]	0	-1.29718	-1.30027	1.34835	0.000222281	0.00498392
ENSBTAG00000030940	510988	GTPase, IMAP family member 7 [Source:NCBI gene (formerly Entrezgene);Acc:510988]	GIMAP7	1.16785	1.16979	2.99109	0.000222679	0.00498426
ENSBTAG00000026977	522188	protein tyrosine phosphatase receptor type Q [Source:VGNC Symbol;Acc:VGNC:33556]	PTPRQ	-1.75895	-1.76949	-0.0327778	0.000223427	0.00498505
ENSBTAG00000008313	407241	Kruppel like factor 15 [Source:VGNC Symbol;Acc:VGNC:30629]	KLF15	-1.43971	-1.44758	0.147873	0.00022348	0.00498505
ENSBTAG00000015615	540554	thymocyte selection associated [Source:VGNC Symbol;Acc:VGNC:35835]	THEMIS	-1.29917	-1.30368	0.733911	0.000224067	0.00498751
ENSBTAG00000005574	280750	clusterin [Source:NCBI gene (formerly Entrezgene);Acc:280750]	CLU	1.6359	1.636	8.10268	0.000224513	0.00498751
ENSBTAG00000003791	532829	lysophosphatidic acid receptor 3 [Source:VGNC Symbol;Acc:VGNC:30957]	LPAR3	-0.951329	-0.951401	6.154	0.000224739	0.00498751
ENSBTAG00000008940	513538	neuronal pentraxin 1 [Source:VGNC Symbol;Acc:VGNC:32218]	NPTX1	3.88594	4.36103	0.869455	0.000229326	0.00508066
ENSBTAG00000019052	511203	ankyrin 3 [Source:VGNC Symbol;Acc:VGNC:55032]	ANK3	-2.49704	-2.53685	-1.02276	0.000233615	0.00516689
ENSBTAG00000000828	539360	calpain 6 [Source:VGNC Symbol;Acc:VGNC:26749]	CAPN6	-1.52082	-1.53145	-0.142318	0.000235577	0.00520146
ENSBTAG00000052715	#N/A	0	0	-0.994678	-0.995299	3.33108	0.00023619	0.00520611
ENSBTAG00000049641	100848511	ecto-NOX disulfide-thiol exchanger 2 [Source:NCBI gene (formerly Entrezgene);Acc:100848511]	ENOX2	-1.22293	-1.22414	2.41515	0.000236587	0.00520611
ENSBTAG00000010030	#N/A	EPH receptor A4 [Source:VGNC Symbol;Acc:VGNC:56106]	EPHA4	1.03727	1.03752	5.81769	0.000241192	0.0052985
ENSBTAG00000014920	535644	semaphorin 3E [Source:VGNC Symbol;Acc:VGNC:34430]	SEMA3E	1.095	1.09606	3.1874	0.000245379	0.00537763
ENSBTAG00000021934	614455	retinol saturase [Source:VGNC Symbol;Acc:VGNC:33881]	RETSAT	-0.929144	-0.929329	5.01098	0.00024562	0.00537763
ENSBTAG00000037721	#N/A	0	0	1.912	1.9188	1.93001	0.000247194	0.00540302
ENSBTAG00000016327	531921	solute carrier family 28 member 2 [Source:VGNC Symbol;Acc:VGNC:34792]	SLC28A2	-1.57368	-1.58888	-0.40431	0.000251347	0.0054846
ENSBTAG00000016107	526175	phosphate cytidylyltransferase 1, choline, beta [Source:VGNC Symbol;Acc:VGNC:32653]	PCYT1B	1.53245	1.54066	0.885145	0.00025273	0.0054907
ENSBTAG00000020070	533151	ATP binding cassette subfamily C member 3 [Source:VGNC Symbol;Acc:VGNC:25473]	ABCC3	1.04704	1.04744	5.13032	0.000252835	0.0054907
ENSBTAG00000054367	508008	Wnt family member 5B [Source:NCBI gene (formerly Entrezgene);Acc:508008]	WNT5B	1.84017	1.86073	0.40952	0.000252892	0.0054907
ENSBTAG00000004989	615340	interferon regulatory factor 5 [Source:VGNC Symbol;Acc:VGNC:30276]	IRF5	1.08307	1.08409	3.58807	0.000253838	0.00550207
ENSBTAG00000015095	517396	tetratricopeptide repeat domain 6 [Source:VGNC Symbol;Acc:VGNC:59372]	TTC6	-2.09623	-2.13101	-0.993618	0.000255288	0.00552432
ENSBTAG00000009443	404167	glucosaminyl (N-acetyl) transferase 3, mucin type [Source:NCBI gene (formerly Entrezgene);Acc:404167]	GCNT3	1.89334	1.89991	2.09485	0.000256487	0.00553494
ENSBTAG00000013054	512633	major facilitator superfamily domain containing 2A [Source:VGNC Symbol;Acc:VGNC:31435]	MFSD2A	1.26308	1.26631	2.31842	0.000256629	0.00553494
ENSBTAG00000000277	281249	interleukin 18 [Source:VGNC Symbol;Acc:VGNC:30126]	IL18	1.10475	1.1048	7.96345	0.000260716	0.00561379
ENSBTAG00000001836	#N/A	0	0	1.30941	1.31173	2.9879	0.000262708	0.00564735
ENSBTAG00000020223	508394	calsequestrin 1 [Source:VGNC Symbol;Acc:VGNC:26786]	CASQ1	0.99324	0.994605	2.86551	0.000267469	0.00574022
ENSBTAG00000016411	510037	ring finger protein 122 [Source:VGNC Symbol;Acc:VGNC:34015]	RNF122	0.943241	0.943531	5.03243	0.000268788	0.00575906
ENSBTAG00000013535	507981	DNA fragmentation factor subunit alpha [Source:NCBI gene (formerly Entrezgene);Acc:507981]	DFFA	1.00605	1.00614	7.12745	0.000277984	0.00593949
ENSBTAG00000007121	504652	thymidine kinase 1 [Source:VGNC Symbol;Acc:VGNC:35884]	TK1	1.09352	1.09362	6.97895	0.000278121	0.00593949
ENSBTAG00000005164	528871	granzyme K [Source:VGNC Symbol;Acc:VGNC:29733]	GZMK	5.10161	1.44269e+08	-0.187261	0.000279564	0.00595464
ENSBTAG00000021568	787487	von Willebrand factor C and EGF domains [Source:VGNC Symbol;Acc:VGNC:36859]	VWCE	1.66702	1.68347	1.49111	0.000279745	0.00595464
ENSBTAG00000011590	767905	GLI pathogenesis related 1 [Source:VGNC Symbol;Acc:VGNC:29402]	GLIPR1	2.06174	2.06768	2.49461	0.000303631	0.00645254
ENSBTAG00000013148	414922	claudin 1 [Source:VGNC Symbol;Acc:VGNC:27402]	CLDN1	-0.952197	-0.952213	8.44666	0.000308982	0.00655555
ENSBTAG00000005524	515320	HMG-box transcription factor 1 [Source:VGNC Symbol;Acc:VGNC:29767]	HBP1	-0.941001	-0.941072	6.37351	0.000309755	0.00656128
ENSBTAG00000051575	787258	forkhead box E3 [Source:NCBI gene (formerly Entrezgene);Acc:787258]	FOXE3	2.04234	2.08333	-0.00868717	0.0003123	0.00660443
ENSBTAG00000019741	540702	complement C3a receptor 1 [Source:VGNC Symbol;Acc:VGNC:26639]	C3AR1	2.67714	2.79916	0.598338	0.00031542	0.00664026
ENSBTAG00000016973	613506	serine protease 8 [Source:VGNC Symbol;Acc:VGNC:33426]	PRSS8	2.87203	3.03605	-0.242077	0.000315421	0.00664026
ENSBTAG00000021151	317655	myosin heavy chain 10 [Source:VGNC Symbol;Acc:VGNC:31794]	MYH10	0.95531	0.955317	10.1974	0.000315598	0.00664026
ENSBTAG00000002972	526444	cilia and flagella associated protein 94 [Source:VGNC Symbol;Acc:VGNC:99768]	CFAP94	-1.22656	-1.22903	1.52294	0.000316033	0.00664026
ENSBTAG00000004046	528508	deltex E3 ubiquitin ligase 4 [Source:VGNC Symbol;Acc:VGNC:54867]	DTX4	1.2658	1.26889	2.41224	0.000317556	0.00666152
ENSBTAG00000045879	101903708	calcium homeostasis modulator family member 5 [Source:VGNC Symbol;Acc:VGNC:26711]	CALHM5	2.62194	2.67158	0.588954	0.000318561	0.00667186
ENSBTAG00000001102	510205	serpin family B member 10 [Source:VGNC Symbol;Acc:VGNC:56372]	SERPINB10	1.00558	1.00577	5.91893	0.00032509	0.00679767
ENSBTAG00000048781	#N/A	0	0	-0.94002	-0.940092	6.25312	0.000326056	0.00679861
ENSBTAG00000019069	513812	synaptogyrin 2 [Source:NCBI gene (formerly Entrezgene);Acc:513812]	SYNGR2	1.29746	1.29778	5.84574	0.000326479	0.00679861
ENSBTAG00000004878	525741	CaM kinase like vesicle associated [Source:VGNC Symbol;Acc:VGNC:26728]	CAMKV	1.54677	1.55424	1.98888	0.000326701	0.00679861
ENSBTAG00000002981	540455	PICALM interacting mitotic regulator [Source:VGNC Symbol;Acc:VGNC:32902]	PIMREG	0.95346	0.953673	5.83677	0.000330786	0.00687265
ENSBTAG00000002878	509942	chordin [Source:VGNC Symbol;Acc:VGNC:27316]	CHRD	1.54696	1.5479	4.63661	0.000333905	0.0069264
ENSBTAG00000021015	784700	inhibitory synaptic factor 2A [Source:VGNC Symbol;Acc:VGNC:28775]	INSYN2A	1.77836	1.79209	1.04416	0.0003345	0.00692771
ENSBTAG00000019513	617008	chromosome 11 C9orf50 homolog [Source:VGNC Symbol;Acc:VGNC:52622]	C11H9orf50	1.67013	1.67356	2.97628	0.000335798	0.00694355
ENSBTAG00000004231	507389	glycoprotein M6A [Source:VGNC Symbol;Acc:VGNC:97275]	GPM6A	-0.95455	-0.954558	9.18452	0.000337329	0.00696416
ENSBTAG00000017655	509823	palmdelphin [Source:VGNC Symbol;Acc:VGNC:32560]	PALMD	-1.40108	-1.40492	1.60634	0.000343077	0.00707162
ENSBTAG00000017450	533510	kelch like family member 24 [Source:VGNC Symbol;Acc:VGNC:30652]	KLHL24	-1.02858	-1.02898	3.98887	0.000344068	0.00708084
ENSBTAG00000020632	519632	NAD(P)H quinone dehydrogenase 1 [Source:VGNC Symbol;Acc:VGNC:57053]	NQO1	-0.952916	-0.953098	4.92583	0.00034658	0.00712128
ENSBTAG00000043568	3283884	NADH dehydrogenase subunit 3 [Source:NCBI gene (formerly Entrezgene);Acc:3283884]	ND3	-0.864454	-0.864458	10.2698	0.000349535	0.0071707
ENSBTAG00000006039	327676	Rho GDP dissociation inhibitor beta [Source:VGNC Symbol;Acc:VGNC:26102]	ARHGDIB	-1.44426	-1.4524	0.440784	0.000350166	0.00717234
ENSBTAG00000033699	512928	cholinergic receptor muscarinic 4 [Source:VGNC Symbol;Acc:VGNC:54862]	CHRM4	2.24947	2.28311	0.714274	0.000352986	0.00721875
ENSBTAG00000015618	618677	growth differentiation factor 15 [Source:VGNC Symbol;Acc:VGNC:29301]	GDF15	1.45383	1.45505	4.54047	0.000353886	0.00722582
ENSBTAG00000017043	509707	G protein-coupled receptor 1 [Source:VGNC Symbol;Acc:VGNC:29542]	GPR1	-1.99722	-2.02457	-0.979041	0.000367108	0.00748406
ENSBTAG00000006618	516069	HLF transcription factor, PAR bZIP family member [Source:VGNC Symbol;Acc:VGNC:50275]	HLF	-1.4355	-1.44004	0.757987	0.00037777	0.00768938
ENSBTAG00000000218	100295732	mitogen-activated protein kinase kinase 5 [Source:VGNC Symbol;Acc:VGNC:31186]	MAP2K5	-0.937414	-0.937773	3.91246	0.000380491	0.00773269
ENSBTAG00000014645	100140960	contactin 2 [Source:VGNC Symbol;Acc:VGNC:27537]	CNTN2	1.36485	1.36908	2.05037	0.000387393	0.00786069
ENSBTAG00000014465	281375	serpin family E member 1 [Source:VGNC Symbol;Acc:VGNC:34476]	SERPINE1	1.26946	1.26949	9.24305	0.000390795	0.0079174
ENSBTAG00000031658	527573	semaphorin 6B [Source:VGNC Symbol;Acc:VGNC:34442]	SEMA6B	1.37779	1.38025	3.02256	0.000392412	0.00793781
ENSBTAG00000009419	525062	tripartite motif containing 29 [Source:VGNC Symbol;Acc:VGNC:36325]	TRIM29	2.96076	3.04582	0.351444	0.000395283	0.0079835
ENSBTAG00000013801	540688	PBX homeobox 1 [Source:VGNC Symbol;Acc:VGNC:32607]	PBX1	-0.958839	-0.959052	4.5736	0.000397799	0.00802187
ENSBTAG00000002952	514352	T-box transcription factor 19 [Source:VGNC Symbol;Acc:VGNC:35665]	TBX19	-1.76115	-1.79133	-1.27234	0.000400453	0.00806291
ENSBTAG00000050852	513990	C-X-C motif chemokine ligand 9 [Source:NCBI gene (formerly Entrezgene);Acc:513990]	CXCL9	-1.05052	-1.05066	5.40124	0.000416214	0.00836731
ENSBTAG00000048939	#N/A	0	0	-1.2506	-1.25725	0.304002	0.000421733	0.00846521
ENSBTAG00000017839	#N/A	TIAM Rac1 associated GEF 1 [Source:VGNC Symbol;Acc:VGNC:56334]	TIAM1	-1.42607	-1.4302	0.892355	0.000423283	0.00848324
ENSBTAG00000007450	515440	complement C2 [Source:VGNC Symbol;Acc:VGNC:53959]	C2	-1.10106	-1.10131	4.70712	0.000426822	0.00854104
ENSBTAG00000012007	338437	suppressor of cytokine signaling 2 [Source:VGNC Symbol;Acc:VGNC:35120]	SOCS2	1.98933	2.01912	0.479995	0.000432791	0.00863501
ENSBTAG00000008953	524959	transporter 1, ATP binding cassette subfamily B member [Source:VGNC Symbol;Acc:VGNC:35598]	TAP1	1.0501	1.05046	5.60084	0.00043321	0.00863501
ENSBTAG00000003595	614187	family with sequence similarity 216 member B [Source:VGNC Symbol;Acc:VGNC:28796]	FAM216B	-1.38674	-1.39468	0.0490186	0.000433507	0.00863501
ENSBTAG00000034693	281511	synaptotagmin 1 [Source:VGNC Symbol;Acc:VGNC:35535]	SYT1	-1.08166	-1.08173	6.30922	0.000448181	0.00891367
ENSBTAG00000008428	515029	uridine phosphorylase 1 [Source:VGNC Symbol;Acc:VGNC:36688]	UPP1	1.68867	1.71615	0.0916995	0.000449963	0.00893547
ENSBTAG00000019634	100137737	p53-induced death domain protein 1 [Source:VGNC Symbol;Acc:VGNC:32863]	PIDD1	1.56184	1.56346	3.64488	0.000452551	0.00897318
ENSBTAG00000004085	510538	anti-silencing function 1B histone chaperone [Source:VGNC Symbol;Acc:VGNC:50605]	ASF1B	0.831413	0.83156	5.78551	0.000466092	0.00922763
ENSBTAG00000005151	527992	WD repeat containing planar cell polarity effector [Source:VGNC Symbol;Acc:VGNC:36879]	WDPCP	-1.15517	-1.15746	1.48834	0.000472486	0.00934002
ENSBTAG00000021949	281348	neurofilament light [Source:VGNC Symbol;Acc:VGNC:31986]	NEFL	4.14527	4.62519	-0.884515	0.000484476	0.00956253
ENSBTAG00000013923	281437	glutaminyl-peptide cyclotransferase [Source:VGNC Symbol;Acc:VGNC:33598]	QPCT	2.61376	2.77295	-0.365449	0.000489565	0.00964836
ENSBTAG00000009545	504618	protein phosphatase with EF-hand domain 1 [Source:VGNC Symbol;Acc:VGNC:33190]	PPEF1	-1.36301	-1.36794	0.507573	0.000491879	0.00967932
ENSBTAG00000000400	528459	keratin 85 [Source:VGNC Symbol;Acc:VGNC:50410]	KRT85	1.56009	1.56933	1.99121	0.000495321	0.00972917
ENSBTAG00000001099	614601	PILR alpha associated neural protein [Source:VGNC Symbol;Acc:VGNC:32855]	PIANP	1.36184	1.36768	1.68992	0.000495906	0.00972917
ENSBTAG00000000536	509082	zinc finger protein 395 [Source:VGNC Symbol;Acc:VGNC:37266]	ZNF395	-0.876649	-0.876738	5.80555	0.000498188	0.00975924
ENSBTAG00000019867	534683	copper metabolism domain containing 1 [Source:VGNC Symbol;Acc:VGNC:27581]	COMMD1	-0.976309	-0.976612	4.29746	0.000502034	0.00981069
ENSBTAG00000000246	525813	malic enzyme 3 [Source:VGNC Symbol;Acc:VGNC:31341]	ME3	-1.02413	-1.02578	1.71021	0.000502321	0.00981069
ENSBTAG00000049987	#N/A	0	0	-2.29614	-2.34055	-1.0164	0.000503128	0.00981175
ENSBTAG00000003794	281792	G protein subunit alpha o1 [Source:VGNC Symbol;Acc:VGNC:57047]	GNAO1	2.29764	2.36475	-0.147853	0.00050812	0.00988363
ENSBTAG00000011451	532565	reticulon 1 [Source:VGNC Symbol;Acc:VGNC:34203]	RTN1	-0.95991	-0.960089	4.80353	0.00050895	0.00988363
ENSBTAG00000007566	529230	centrosomal protein 170 [Source:VGNC Symbol;Acc:VGNC:27197]	CEP170	-0.912255	-0.912293	7.21677	0.000509146	0.00988363
ENSBTAG00000004196	788992	formin like 1 [Source:VGNC Symbol;Acc:VGNC:29046]	FMNL1	1.08698	1.08772	4.03816	0.000509849	0.00988363
ENSBTAG00000047161	100336572	arylsulfatase family member H [Source:VGNC Symbol;Acc:VGNC:50166]	ARSH	-1.36694	-1.3743	0.39713	0.000515629	0.00998082
ENSBTAG00000035995	786672	TNF alpha induced protein 2 [Source:VGNC Symbol;Acc:VGNC:53955]	TNFAIP2	1.74248	1.75228	1.55413	0.00051653	0.00998344
ENSBTAG00000020895	281904	lysyl oxidase like 4 [Source:VGNC Symbol;Acc:VGNC:55958]	LOXL4	1.37496	1.38112	1.37419	0.000521779	0.0100699
ENSBTAG00000047532	100848801	triple QxxK/R motif containing [Source:VGNC Symbol;Acc:VGNC:36361]	TRIQK	-1.06746	-1.06802	3.37502	0.000524177	0.010091
ENSBTAG00000000507	528390	nuclear receptor subfamily 4 group A member 1 [Source:VGNC Symbol;Acc:VGNC:32245]	NR4A1	1.35398	1.35619	3.67846	0.00052442	0.010091
ENSBTAG00000032206	767995	hemogen [Source:VGNC Symbol;Acc:VGNC:29807]	HEMGN	2.30657	2.33635	0.852979	0.000536938	0.0103167
ENSBTAG00000006859	100336941	0	0	3.94043	4.41663	-0.284499	0.000538032	0.010322
ENSBTAG00000009705	281386	serpin family F member 1 [Source:VGNC Symbol;Acc:VGNC:34478]	SERPINF1	-1.43265	-1.43816	0.554556	0.000538799	0.010322
ENSBTAG00000006720	539491	gap junction protein alpha 5 [Source:VGNC Symbol;Acc:VGNC:29374]	GJA5	-0.998126	-0.998274	5.18921	0.0005435	0.0103967
ENSBTAG00000033510	540423	myelin protein zero like 2 [Source:VGNC Symbol;Acc:VGNC:31593]	MPZL2	1.15013	1.15057	4.55078	0.00054736	0.0104552
ENSBTAG00000017867	521410	yippee like 1 [Source:VGNC Symbol;Acc:VGNC:37034]	YPEL1	-1.12257	-1.12387	2.15587	0.000549844	0.0104783
ENSBTAG00000006726	526711	coiled-coil domain containing 102B [Source:VGNC Symbol;Acc:VGNC:56364]	CCDC102B	1.12349	1.12621	2.05685	0.000550175	0.0104783
ENSBTAG00000007502	281692	creatine kinase, mitochondrial 1A [Source:NCBI gene (formerly Entrezgene);Acc:281692]	CKMT1A	1.72989	1.73195	3.50608	0.000555216	0.0105588
ENSBTAG00000016963	540722	ADAM metallopeptidase with thrombospondin type 1 motif 6 [Source:VGNC Symbol;Acc:VGNC:25628]	ADAMTS6	-1.14326	-1.14358	4.61537	0.000558953	0.0106144
ENSBTAG00000013505	#N/A	IQ motif containing with AAA domain 1 [Source:VGNC Symbol;Acc:VGNC:30248]	IQCA1	-2.36771	-2.42587	-1.45771	0.000562926	0.0106743
ENSBTAG00000039483	529902	desmoglein 3 [Source:VGNC Symbol;Acc:VGNC:28222]	DSG3	1.5344	1.54749	0.838923	0.000565033	0.0106987
ENSBTAG00000025434	614773	ZFP36 ring finger protein like 1 [Source:VGNC Symbol;Acc:VGNC:37163]	ZFP36L1	-0.864416	-0.864435	8.18367	0.000573097	0.0108356
ENSBTAG00000026842	529922	zinc finger RANBP2-type containing 3 [Source:VGNC Symbol;Acc:VGNC:37373]	ZRANB3	-0.916728	-0.917015	4.12555	0.000574387	0.0108443
ENSBTAG00000000742	538514	angiomotin like 2 [Source:VGNC Symbol;Acc:VGNC:25872]	AMOTL2	0.813603	0.813664	7.11993	0.00057614	0.0108616
ENSBTAG00000009836	281070	chromogranin A [Source:VGNC Symbol;Acc:VGNC:27289]	CHGA	3.05567	3.29936	-0.252582	0.000582671	0.0109689
ENSBTAG00000020046	516565	CXADR like membrane protein [Source:VGNC Symbol;Acc:VGNC:50091]	CLMP	-1.11373	-1.11448	3.02301	0.000584841	0.0109938
ENSBTAG00000011682	510255	GLI family zinc finger 2 [Source:VGNC Symbol;Acc:VGNC:29400]	GLI2	-1.586	-1.59791	-0.272504	0.000589093	0.0110578
ENSBTAG00000010978	515324	prospero homeobox 1 [Source:VGNC Symbol;Acc:VGNC:33369]	PROX1	2.40751	2.48692	0.853281	0.000593713	0.0111285
ENSBTAG00000007216	515409	double PHD fingers 1 [Source:VGNC Symbol;Acc:VGNC:28175]	DPF1	1.5721	1.57743	1.92928	0.000599047	0.0112123
ENSBTAG00000005534	540303	enolase 3 [Source:VGNC Symbol;Acc:VGNC:28498]	ENO3	0.98461	0.98478	6.18146	0.000602502	0.0112608
ENSBTAG00000007430	513045	MYB binding protein 1a [Source:VGNC Symbol;Acc:VGNC:31777]	MYBBP1A	1.18804	1.18827	6.3497	0.000609337	0.0113722
ENSBTAG00000007799	534254	mitochondrial fission regulator 2 [Source:VGNC Symbol;Acc:VGNC:31728]	MTFR2	1.10295	1.10309	6.66399	0.000613495	0.0114335
ENSBTAG00000011274	526006	enolase 2 [Source:VGNC Symbol;Acc:VGNC:28497]	ENO2	1.21702	1.22105	2.44485	0.000617978	0.0115006
ENSBTAG00000003920	407997	transglutaminase 1 [Source:VGNC Symbol;Acc:VGNC:35809]	TGM1	1.39293	1.39777	2.41847	0.000622664	0.0115601
ENSBTAG00000053812	#N/A	0	0	1.36637	1.36771	3.81835	0.000622954	0.0115601
ENSBTAG00000017500	521931	potassium two pore domain channel subfamily K member 12 [Source:VGNC Symbol;Acc:VGNC:30467]	KCNK12	1.96967	1.99197	0.671621	0.000629981	0.0116739
ENSBTAG00000006606	112442617	refilin B [Source:VGNC Symbol;Acc:VGNC:58403]	RFLNB	1.44641	1.4557	1.08807	0.000638422	0.0118135
ENSBTAG00000024869	517354	C-X3-C motif chemokine ligand 1 [Source:VGNC Symbol;Acc:VGNC:52190]	CX3CL1	-1.38174	-1.38315	2.80926	0.000644171	0.011903
ENSBTAG00000021609	512637	adhesion G protein-coupled receptor F1 [Source:VGNC Symbol;Acc:VGNC:25661]	ADGRF1	2.42743	2.49593	0.244837	0.000646476	0.0119273
ENSBTAG00000008538	524709	dynein axonemal intermediate chain 1 [Source:VGNC Symbol;Acc:VGNC:28129]	DNAI1	1.62828	1.63596	1.56286	0.000647315	0.0119273
ENSBTAG00000002065	511317	transcription factor AP-2 gamma [Source:VGNC Symbol;Acc:VGNC:35778]	TFAP2C	5.10311	1.44269e+08	-0.0660761	0.000649254	0.0119461
ENSBTAG00000040543	112448061	transmembrane protein 200A [Source:VGNC Symbol;Acc:VGNC:57364]	TMEM200A	-0.955849	-0.955919	6.27913	0.000660451	0.0121221
ENSBTAG00000020622	#N/A	collagen type IX alpha 2 chain [Source:VGNC Symbol;Acc:VGNC:27576]	COL9A2	2.43978	2.5196	0.195364	0.00066068	0.0121221
ENSBTAG00000006599	517587	inhibin subunit beta E [Source:VGNC Symbol;Acc:VGNC:30203]	INHBE	-1.12973	-1.13025	3.40925	0.000666793	0.012217
ENSBTAG00000055120	525644	oligophrenin 1 [Source:NCBI gene (formerly Entrezgene);Acc:525644]	OPHN1	-1.23351	-1.23564	1.59837	0.000682068	0.0124793
ENSBTAG00000030340	788579	intermediate filament family orphan 2 [Source:NCBI gene (formerly Entrezgene);Acc:788579]	IFFO2	1.17382	1.17529	3.24597	0.000683847	0.0124906
ENSBTAG00000000902	532053	O-linked N-acetylglucosamine (GlcNAc) transferase [Source:NCBI gene (formerly Entrezgene);Acc:532053]	OGT	-0.894229	-0.894253	7.91248	0.000684603	0.0124906
ENSBTAG00000003220	528076	atypical chemokine receptor 1 [Source:VGNC Symbol;Acc:VGNC:58436]	ACKR1	2.12231	2.14656	0.659323	0.000698766	0.0127258
ENSBTAG00000040590	#N/A	0	0	1.54955	1.55491	1.81373	0.000699446	0.0127258
ENSBTAG00000002942	516135	solute carrier family 2 member 10 [Source:VGNC Symbol;Acc:VGNC:34797]	SLC2A10	1.03625	1.03727	3.31173	0.000714123	0.0129747
ENSBTAG00000014554	504492	snail family transcriptional repressor 1 [Source:VGNC Symbol;Acc:VGNC:35047]	SNAI1	1.48378	1.4932	1.2387	0.000715298	0.012978
ENSBTAG00000050907	104968464	ribonuclease P/MRP subunit p21 [Source:NCBI gene (formerly Entrezgene);Acc:104968464]	RPP21	1.5194	1.52895	1.60061	0.000718341	0.0130092
ENSBTAG00000004355	100337359	roundabout guidance receptor 3 [Source:VGNC Symbol;Acc:VGNC:34080]	ROBO3	1.51988	1.52113	4.03364	0.000719018	0.0130092
ENSBTAG00000046037	282479	solute carrier family 25 member 5 [Source:VGNC Symbol;Acc:VGNC:49966]	SLC25A5	0.777878	0.777932	7.24716	0.000720615	0.01302
ENSBTAG00000004751	537578	spectrin beta, non-erythrocytic 4 [Source:VGNC Symbol;Acc:VGNC:35254]	SPTBN4	1.282	1.28282	4.38647	0.000725906	0.0130975
ENSBTAG00000032852	#N/A	G protein-coupled receptor associated sorting protein 2 [Source:VGNC Symbol;Acc:VGNC:29605]	GPRASP2	-0.995736	-0.997151	2.10781	0.000728883	0.013133
ENSBTAG00000010587	614007	SH3 domain binding glutamate rich protein like [Source:VGNC Symbol;Acc:VGNC:34564]	SH3BGRL	-0.988843	-0.988919	6.27065	0.000749107	0.0134726
ENSBTAG00000044004	617568	shortage in chiasmata 1 [Source:VGNC Symbol;Acc:VGNC:52743]	SHOC1	-2.2247	-2.25652	-1.05616	0.000749802	0.0134726
ENSBTAG00000001952	520936	prominin 2 [Source:VGNC Symbol;Acc:VGNC:33365]	PROM2	3.59329	3.84645	0.0683951	0.000754416	0.0135369
ENSBTAG00000050644	#N/A	0	0	-1.66986	-1.68779	-0.467082	0.000756554	0.0135566
ENSBTAG00000024490	#N/A	0	0	1.58574	1.59628	1.05977	0.000758171	0.0135669
ENSBTAG00000015441	281595	actin gamma 2, smooth muscle [Source:VGNC Symbol;Acc:VGNC:59201]	ACTG2	1.64829	1.65164	2.21977	0.000761377	0.0135995
ENSBTAG00000010992	510524	cathepsin H [Source:VGNC Symbol;Acc:VGNC:27816]	CTSH	0.89142	0.892052	4.02703	0.00076208	0.0135995
ENSBTAG00000016191	512392	zinc finger protein 32 [Source:VGNC Symbol;Acc:VGNC:37247]	ZNF32	-1.02471	-1.02565	2.70611	0.000773566	0.0137702
ENSBTAG00000018422	507427	receptor interacting serine/threonine kinase 3 [Source:VGNC Symbol;Acc:VGNC:52818]	RIPK3	1.38567	1.39495	0.578205	0.000773762	0.0137702
ENSBTAG00000005092	785924	receptor tyrosine kinase like orphan receptor 2 [Source:VGNC Symbol;Acc:VGNC:34087]	ROR2	-1.03265	-1.03317	3.50053	0.000786469	0.0139773
ENSBTAG00000009769	101906939	retinol-binding protein 1 [Source:NCBI gene (formerly Entrezgene);Acc:101906939]	0	-2.21296	-2.25365	-1.22005	0.000800295	0.0142036
ENSBTAG00000034182	782966	tubulin alpha-1 chain [Source:NCBI gene (formerly Entrezgene);Acc:782966]	0	1.04814	1.04889	3.72052	0.000806854	0.0143005
ENSBTAG00000043963	784913	FH2 domain containing 1 [Source:VGNC Symbol;Acc:VGNC:28997]	FHDC1	1.03818	1.03925	3.40021	0.00081223	0.0143763
ENSBTAG00000012729	537718	Cdc42 guanine nucleotide exchange factor 9 [Source:VGNC Symbol;Acc:VGNC:26122]	ARHGEF9	-1.14629	-1.14733	2.55025	0.000821145	0.0145143
ENSBTAG00000005999	510595	fibronectin type III and SPRY domain containing 1 [Source:VGNC Symbol;Acc:VGNC:29129]	FSD1	1.71148	1.72376	1.2153	0.000825078	0.0145641
ENSBTAG00000018431	100139508	neuron navigator 2 [Source:VGNC Symbol;Acc:VGNC:31891]	NAV2	1.26756	1.26782	5.69965	0.000834793	0.0147156
ENSBTAG00000014921	280826	interleukin 6 [Source:VGNC Symbol;Acc:VGNC:30166]	IL6	1.66962	1.67587	2.49656	0.000838057	0.0147532
ENSBTAG00000011473	505964	myosin light chain 9 [Source:VGNC Symbol;Acc:VGNC:57010]	MYL9	1.27159	1.27164	8.15675	0.000839629	0.0147609
ENSBTAG00000052055	614940	serine protease 35 [Source:NCBI gene (formerly Entrezgene);Acc:614940]	PRSS35	-0.966854	-0.967083	4.58755	0.000845559	0.0148451
ENSBTAG00000005704	522114	interleukin 1 receptor like 2 [Source:VGNC Symbol;Acc:VGNC:30135]	IL1RL2	1.53338	1.54606	0.893834	0.000853835	0.014965
ENSBTAG00000045808	100336471	interleukin 17 receptor E like [Source:VGNC Symbol;Acc:VGNC:56210]	IL17REL	5.75291	1.44269e+08	-0.517808	0.000854685	0.014965
ENSBTAG00000032687	505033	cystatin-9-like [Source:NCBI gene (formerly Entrezgene);Acc:505033]	0	-1.22384	-1.22517	2.19106	0.000860179	0.015041
ENSBTAG00000015792	787705	cilia and flagella associated protein 54 [Source:NCBI gene (formerly Entrezgene);Acc:787705]	CFAP54	-1.79614	-1.80678	0.0751226	0.000875689	0.0152917
ENSBTAG00000014467	524909	GLIS family zinc finger 3 [Source:NCBI gene (formerly Entrezgene);Acc:524909]	0	-1.1698	-1.17318	1.06109	0.000878036	0.0153122
ENSBTAG00000006404	513195	centromere protein T [Source:VGNC Symbol;Acc:VGNC:27185]	CENPT	0.912467	0.91252	7.55002	0.000890272	0.0155005
ENSBTAG00000007394	614872	ribosomal protein L22 like 1 [Source:NCBI gene (formerly Entrezgene);Acc:614872]	RPL22L1	-1.03688	-1.03709	5.08564	0.000891216	0.0155005
ENSBTAG00000006676	507975	fin bud initiation factor homolog [Source:VGNC Symbol;Acc:VGNC:56527]	FIBIN	-0.91351	-0.913578	6.24993	0.0009031	0.0156862
ENSBTAG00000009048	514259	EF-hand domain family member D2 [Source:VGNC Symbol;Acc:VGNC:28353]	EFHD2	0.964628	0.964853	5.47216	0.000905556	0.015704
ENSBTAG00000053383	#N/A	0	0	-1.84468	-1.86666	-0.89339	0.000906534	0.015704
ENSBTAG00000012246	512529	anoctamin 2 [Source:VGNC Symbol;Acc:VGNC:25951]	ANO2	1.55285	1.55543	2.91975	0.000910189	0.0157049
ENSBTAG00000009575	518886	TBC1 domain family member 32 [Source:VGNC Symbol;Acc:VGNC:35643]	TBC1D32	-0.979151	-0.979773	3.22905	0.000910192	0.0157049
ENSBTAG00000053561	617577	megakaryocyte and platelet inhibitory receptor G6b [Source:NCBI gene (formerly Entrezgene);Acc:617577]	0	1.53832	1.55291	1.32401	0.000910202	0.0157049
ENSBTAG00000002717	532236	internexin neuronal intermediate filament protein alpha [Source:VGNC Symbol;Acc:VGNC:30191]	INA	1.15804	1.16103	2.58381	0.000912705	0.0157273
ENSBTAG00000008893	534290	anoctamin 10 [Source:VGNC Symbol;Acc:VGNC:54405]	ANO10	-0.859398	-0.859723	3.84264	0.000916318	0.0157452
ENSBTAG00000017430	614251	pregnancy up-regulated nonubiquitous CaM kinase [Source:VGNC Symbol;Acc:VGNC:33079]	PNCK	1.44899	1.46127	0.620602	0.000916817	0.0157452
ENSBTAG00000013235	509642	tubulointerstitial nephritis antigen like 1 [Source:VGNC Symbol;Acc:VGNC:35875]	TINAGL1	1.24724	1.24743	6.31796	0.000917373	0.0157452
ENSBTAG00000004165	#N/A	citramalyl-CoA lyase [Source:VGNC Symbol;Acc:VGNC:27475]	CLYBL	-1.10298	-1.10343	3.64407	0.000925916	0.0158709
ENSBTAG00000006882	505886	IQ motif containing GTPase activating protein 3 [Source:VGNC Symbol;Acc:VGNC:30260]	IQGAP3	0.98676	0.986798	7.92881	0.000931402	0.015944
ENSBTAG00000001961	514739	microtubule associated protein 1B [Source:VGNC Symbol;Acc:VGNC:31178]	MAP1B	0.962458	0.962491	8.23403	0.000944301	0.0161436
ENSBTAG00000051503	107133056	EF-hand calcium binding domain 8 [Source:NCBI gene (formerly Entrezgene);Acc:107133056]	EFCAB8	3.12948	3.29751	0.338084	0.00095796	0.0163556
ENSBTAG00000015131	510932	solute carrier family 29 member 1 [Source:VGNC Symbol;Acc:VGNC:54237]	SLC29A1	1.054	1.05408	7.51208	0.000962387	0.0164097
ENSBTAG00000050253	540699	transient receptor potential cation channel subfamily M member 3 [Source:NCBI gene (formerly Entrezgene);Acc:540699]	TRPM3	-1.27002	-1.27114	2.73684	0.000970545	0.0165272
ENSBTAG00000018569	539668	cullin 4B [Source:VGNC Symbol;Acc:VGNC:27833]	CUL4B	-0.866681	-0.866729	6.79813	0.00097344	0.0165548
ENSBTAG00000016097	509779	calcium voltage-gated channel subunit alpha1 F [Source:VGNC Symbol;Acc:VGNC:26676]	CACNA1F	3.21184	3.38096	0.64477	0.000975164	0.0165625
ENSBTAG00000002144	281605	adrenoceptor beta 2 [Source:VGNC Symbol;Acc:VGNC:25697]	ADRB2	2.22224	2.27398	1.23292	0.000979852	0.0166205
ENSBTAG00000004879	618793	forkhead box O4 [Source:VGNC Symbol;Acc:VGNC:29100]	FOXO4	-0.942059	-0.942233	4.91126	0.000992632	0.0168154
ENSBTAG00000012050	511233	ORAI calcium release-activated calcium modulator 2 [Source:VGNC Symbol;Acc:VGNC:32444]	ORAI2	1.45341	1.45911	2.04647	0.00100172	0.0169453
ENSBTAG00000049861	783109	Bos taurus BoWC1.1 (WC1), mRNA. [Source:RefSeq mRNA;Acc:NM_001281899]	WC1	3.25292	3.71184	-0.593305	0.0010029	0.0169453
ENSBTAG00000001517	506480	keratin 18 [Source:VGNC Symbol;Acc:VGNC:30719]	KRT18	1.18171	1.182	5.72549	0.00100588	0.0169735
ENSBTAG00000011634	504700	acid phosphatase 3 [Source:VGNC Symbol;Acc:VGNC:52603]	ACP3	2.08886	2.12683	-0.189819	0.00102204	0.017224
ENSBTAG00000018152	506295	myeloid associated differentiation marker [Source:NCBI gene (formerly Entrezgene);Acc:506295]	MYADM	1.09448	1.09455	7.21389	0.00103066	0.0173468
ENSBTAG00000001228	504370	cell cycle exit and neuronal differentiation 1 [Source:VGNC Symbol;Acc:VGNC:27173]	CEND1	1.80358	1.84219	0.153575	0.00104025	0.0174855
ENSBTAG00000008350	506632	kelch like family member 21 [Source:VGNC Symbol;Acc:VGNC:30650]	KLHL21	1.07822	1.07871	4.75632	0.00106271	0.01784
ENSBTAG00000027425	617478	coiled-coil domain containing 190 [Source:VGNC Symbol;Acc:VGNC:26883]	CCDC190	-1.23995	-1.24048	3.6667	0.00106852	0.0178981
ENSBTAG00000006563	514526	kelch like family member 40 [Source:VGNC Symbol;Acc:VGNC:30665]	KLHL40	1.41043	1.42031	1.00856	0.00106891	0.0178981
ENSBTAG00000006776	100138505	KIAA0930 [Source:VGNC Symbol;Acc:VGNC:30560]	KIAA0930	1.15801	1.15856	4.35355	0.00107455	0.0179693
ENSBTAG00000018362	540138	transmembrane protein 109 [Source:VGNC Symbol;Acc:VGNC:35949]	TMEM109	0.951376	0.951473	7.11363	0.00107771	0.0179992
ENSBTAG00000018971	617007	RAD51 paralog B [Source:VGNC Symbol;Acc:VGNC:33685]	RAD51B	-1.14891	-1.14995	2.60898	0.00108716	0.0181336
ENSBTAG00000001597	523999	phosphatidylinositol transfer protein membrane associated 2 [Source:VGNC Symbol;Acc:VGNC:32922]	PITPNM2	1.04958	1.05051	3.69804	0.00109934	0.0183135
ENSBTAG00000004322	280795	Fos proto-oncogene, AP-1 transcription factor subunit [Source:VGNC Symbol;Acc:VGNC:29073]	FOS	0.988933	0.989097	6.15249	0.00110091	0.0183161
ENSBTAG00000003958	504970	transmembrane protein 220 [Source:VGNC Symbol;Acc:VGNC:36042]	TMEM220	-1.00421	-1.0046	3.89839	0.00110351	0.0183359
ENSBTAG00000037526	281759	fatty acid binding protein 4, adipocyte [Source:NCBI gene (formerly Entrezgene);Acc:281759]	FABP4	-1.26971	-1.27321	0.977854	0.00110669	0.0183563
ENSBTAG00000021060	508497	FtsJ RNA 2'-O-methyltransferase 3 [Source:VGNC Symbol;Acc:VGNC:29139]	FTSJ3	0.868689	0.86884	6.28014	0.00110755	0.0183563
ENSBTAG00000051722	#N/A	0	0	3.88393	4.35901	-0.656752	0.00110938	0.0183632
ENSBTAG00000000961	526835	neuralized E3 ubiquitin protein ligase 2 [Source:VGNC Symbol;Acc:VGNC:32015]	NEURL2	1.63179	1.64741	1.88968	0.00111079	0.0183633
ENSBTAG00000020334	533096	ectonucleoside triphosphate diphosphohydrolase 5 (inactive) [Source:VGNC Symbol;Acc:VGNC:28511]	ENTPD5	0.856831	0.857059	5.51763	0.00111725	0.0184467
ENSBTAG00000006861	782317	chromosome 11 C2orf73 homolog [Source:VGNC Symbol;Acc:VGNC:52620]	C11H2orf73	2.54411	2.6408	0.734173	0.00112207	0.0185028
ENSBTAG00000048916	509808	lipase G, endothelial type [Source:NCBI gene (formerly Entrezgene);Acc:509808]	LIPG	1.31327	1.31361	5.71896	0.00113128	0.0186311
ENSBTAG00000012434	615969	ecto-NOX disulfide-thiol exchanger 1 [Source:VGNC Symbol;Acc:VGNC:28502]	ENOX1	-0.994336	-0.994662	4.03054	0.00114434	0.0188223
ENSBTAG00000007652	505671	raftlin family member 2 [Source:VGNC Symbol;Acc:VGNC:33892]	RFTN2	-1.25967	-1.26357	0.918876	0.0011647	0.0191331
ENSBTAG00000002918	514749	RAD51 recombinase [Source:VGNC Symbol;Acc:VGNC:33684]	RAD51	0.831069	0.831118	7.44494	0.00116839	0.0191695
ENSBTAG00000020417	525506	death associated protein kinase 3 [Source:VGNC Symbol;Acc:VGNC:27878]	DAPK3	0.996976	0.997068	6.95329	0.00117204	0.0192053
ENSBTAG00000022255	280675	androgen receptor [Source:VGNC Symbol;Acc:VGNC:26053]	AR	-1.18702	-1.19027	0.926376	0.00118174	0.0193398
ENSBTAG00000016747	515001	N-acetyltransferase 10 [Source:VGNC Symbol;Acc:VGNC:31888]	NAT10	0.807978	0.808069	6.53933	0.00119276	0.0194921
ENSBTAG00000018908	507361	glucose-fructose oxidoreductase domain containing 2 [Source:VGNC Symbol;Acc:VGNC:29329]	GFOD2	1.09756	1.09895	3.39972	0.00119403	0.0194921
ENSBTAG00000012938	528253	jumonji and AT-rich interaction domain containing 2 [Source:VGNC Symbol;Acc:VGNC:30371]	JARID2	-1.30973	-1.31365	0.861926	0.00121538	0.019804
ENSBTAG00000020737	530317	SRY-box transcription factor 8 [Source:VGNC Symbol;Acc:VGNC:35151]	SOX8	2.26299	2.32971	-0.320661	0.00121618	0.019804
ENSBTAG00000020928	519627	ADP-ribosylhydrolase like 1 [Source:NCBI gene (formerly Entrezgene);Acc:519627]	ADPRHL1	3.05144	3.13726	0.892565	0.0012182	0.0198122
ENSBTAG00000032485	781310	LHFPL tetraspan subfamily member 1 [Source:VGNC Symbol;Acc:VGNC:30864]	LHFPL1	3.59871	3.8519	-0.883987	0.00122034	0.0198222
ENSBTAG00000021127	281789	G protein subunit alpha 14 [Source:VGNC Symbol;Acc:VGNC:29447]	GNA14	-1.18395	-1.18824	1.04173	0.00122323	0.0198443
ENSBTAG00000003367	#N/A	0	0	1.11179	1.11569	1.56741	0.00123178	0.0199507
ENSBTAG00000049802	#N/A	0	0	-1.20194	-1.20582	0.900257	0.00123342	0.0199507
ENSBTAG00000009129	515909	DNA polymerase iota [Source:VGNC Symbol;Acc:VGNC:33125]	POLI	-0.915274	-0.915419	5.31533	0.00123438	0.0199507
ENSBTAG00000016931	526129	E2F transcription factor 7 [Source:VGNC Symbol;Acc:VGNC:28291]	E2F7	0.855692	0.855858	5.67972	0.00123739	0.0199745
ENSBTAG00000054103	533304	solute carrier family 66 member 2 [Source:NCBI gene (formerly Entrezgene);Acc:533304]	SLC66A2	1.20291	1.20407	3.85788	0.00125371	0.020213
ENSBTAG00000032301	617196	solute carrier family 26 member 7 [Source:VGNC Symbol;Acc:VGNC:34782]	SLC26A7	-1.34319	-1.34594	1.35602	0.00128002	0.0206117
ENSBTAG00000015375	515820	SH2 domain containing 3C [Source:VGNC Symbol;Acc:VGNC:34559]	SH2D3C	2.2543	2.30123	0.242693	0.00129215	0.0207812
ENSBTAG00000021427	618214	homeobox B3 [Source:VGNC Symbol;Acc:VGNC:29919]	HOXB3	-0.910148	-0.91055	3.78024	0.00129457	0.0207946
ENSBTAG00000047461	#N/A	0	0	-1.14783	-1.14909	2.38033	0.00131175	0.0210446
ENSBTAG00000003669	540746	basonuclin 2 [Source:VGNC Symbol;Acc:VGNC:56936]	BNC2	-0.999686	-0.999993	4.20921	0.00133629	0.021388
ENSBTAG00000008140	508882	fibroblast activation protein alpha [Source:VGNC Symbol;Acc:VGNC:28862]	FAP	-1.26387	-1.2649	2.82328	0.00133644	0.021388
ENSBTAG00000008592	282227	Fc fragment of IgG receptor Ia [Source:NCBI gene (formerly Entrezgene);Acc:282227]	FCGR1A	2.5826	2.64412	0.417354	0.00134567	0.0215093
ENSBTAG00000052230	#N/A	0	0	1.96602	2.01022	-0.174392	0.00134818	0.021523
ENSBTAG00000003323	782674	nucleolar protein 6 [Source:VGNC Symbol;Acc:VGNC:32158]	NOL6	0.998044	0.998365	5.42031	0.00135376	0.0215856
ENSBTAG00000008944	520406	crumbs cell polarity complex component 1 [Source:VGNC Symbol;Acc:VGNC:27688]	CRB1	2.36243	2.37666	1.8075	0.00136719	0.0217731
ENSBTAG00000017339	538628	RUNX1 partner transcriptional co-repressor 1 [Source:VGNC Symbol;Acc:VGNC:55756]	RUNX1T1	-0.877498	-0.877736	4.6145	0.00137308	0.0218377
ENSBTAG00000016504	522241	ArfGAP with GTPase domain, ankyrin repeat and PH domain 1 [Source:VGNC Symbol;Acc:VGNC:59176]	AGAP1	-1.33455	-1.33708	1.50503	0.0013746	0.0218377
ENSBTAG00000011743	504975	tolloid like 2 [Source:VGNC Symbol;Acc:VGNC:35896]	TLL2	2.23352	2.29985	-0.489391	0.00137992	0.0218955
ENSBTAG00000019961	614308	ATPase H+/K+ transporting subunit beta [Source:VGNC Symbol;Acc:VGNC:26298]	ATP4B	1.57891	1.57928	5.6596	0.00138345	0.0219248
ENSBTAG00000052466	#N/A	0	0	0.894338	0.894594	5.60741	0.00139351	0.022053
ENSBTAG00000020887	353113	calcium voltage-gated channel subunit alpha1 E [Source:VGNC Symbol;Acc:VGNC:26675]	CACNA1E	-1.98142	-2.01009	-0.940357	0.00139492	0.022053
ENSBTAG00000004468	539422	BARX homeobox 1 [Source:VGNC Symbol;Acc:VGNC:26423]	BARX1	1.39908	1.40974	0.649609	0.00143935	0.0227277
ENSBTAG00000011871	531767	B and T lymphocyte associated [Source:VGNC Symbol;Acc:VGNC:26602]	BTLA	5.32632	1.44269e+08	-0.04165	0.00144305	0.0227475
ENSBTAG00000011912	527786	solute carrier family 25 member 25 [Source:VGNC Symbol;Acc:VGNC:34751]	SLC25A25	0.937401	0.938139	3.88043	0.00144636	0.0227475
ENSBTAG00000015373	530613	arylacetamide deacetylase like 3 [Source:VGNC Symbol;Acc:VGNC:25439]	AADACL3	-1.75198	-1.7637	-0.0390846	0.00144838	0.0227475
ENSBTAG00000050801	#N/A	0	0	-1.11137	-1.11434	1.12632	0.00144847	0.0227475
ENSBTAG00000052091	#N/A	0	0	-1.54079	-1.55452	-0.554516	0.00144933	0.0227475
ENSBTAG00000008816	538617	tripartite motif containing 2 [Source:VGNC Symbol;Acc:VGNC:36318]	TRIM2	0.927613	0.927846	5.73495	0.00147726	0.0231567
ENSBTAG00000008195	540682	phosphorylase kinase catalytic subunit gamma 1 [Source:VGNC Symbol;Acc:VGNC:32833]	PHKG1	1.16879	1.17319	1.78893	0.00147895	0.0231567
ENSBTAG00000001562	514006	nuclear factor, erythroid 2 [Source:VGNC Symbol;Acc:VGNC:32034]	NFE2	-1.56007	-1.58201	-0.675147	0.00150843	0.0235898
ENSBTAG00000014676	615958	shroom family member 1 [Source:VGNC Symbol;Acc:VGNC:34608]	SHROOM1	0.914619	0.915292	3.60658	0.00152416	0.0238072
ENSBTAG00000005711	523110	neuronal vesicle trafficking associated 1 [Source:VGNC Symbol;Acc:VGNC:32276]	NSG1	1.25586	1.25785	2.36526	0.00153761	0.0239886
ENSBTAG00000055247	#N/A	0	0	-1.04393	-1.04497	2.68909	0.00156307	0.0243567
ENSBTAG00000021158	516952	SATB homeobox 1 [Source:VGNC Symbol;Acc:VGNC:34298]	SATB1	-1.26279	-1.26756	0.614776	0.0015721	0.0244593
ENSBTAG00000016137	509992	zinc finger protein 608 [Source:VGNC Symbol;Acc:VGNC:37311]	ZNF608	-0.817582	-0.817702	5.28197	0.00157342	0.0244593
ENSBTAG00000005556	510299	cytoglobin [Source:VGNC Symbol;Acc:VGNC:50268]	CYGB	1.18862	1.19647	0.514286	0.00158599	0.0246253
ENSBTAG00000013790	523962	mitogen-activated protein kinase kinase kinase 1 [Source:VGNC Symbol;Acc:VGNC:31188]	MAP3K1	-0.938344	-0.938369	7.81475	0.0016161	0.025063
ENSBTAG00000014713	510102	retinoic acid receptor responder 1 [Source:VGNC Symbol;Acc:VGNC:33731]	RARRES1	-0.877361	-0.877375	8.59638	0.00162945	0.02524
ENSBTAG00000011936	100137953	ATPase phospholipid transporting 8B4 (putative) [Source:NCBI gene (formerly Entrezgene);Acc:100137953]	ATP8B4	-1.28731	-1.29429	0.163045	0.00165634	0.0256261
ENSBTAG00000053696	#N/A	0	0	-1.48921	-1.49949	-0.252372	0.00165941	0.025643
ENSBTAG00000005252	785611	nudix hydrolase 11 [Source:NCBI gene (formerly Entrezgene);Acc:785611]	NUDT11	1.93326	1.96263	0.447597	0.00166154	0.0256456
ENSBTAG00000005275	404169	cAMP-dependent protein kinase inhibitor gamma [Source:VGNC Symbol;Acc:VGNC:32942]	PKIG	-1.02367	-1.0246	2.75785	0.00166487	0.0256666
ENSBTAG00000009663	533297	Y-box binding protein 3 [Source:VGNC Symbol;Acc:VGNC:37018]	YBX3	0.825628	0.825717	6.712	0.0016669	0.0256676
ENSBTAG00000024751	100124404	UL16-binding protein 17 [Source:NCBI gene (formerly Entrezgene);Acc:100124404]	ULBP17	1.38918	1.39978	0.888485	0.00167719	0.0257954
ENSBTAG00000002391	515834	transforming growth factor beta 1 induced transcript 1 [Source:VGNC Symbol;Acc:VGNC:35801]	TGFB1I1	1.08944	1.08959	6.15865	0.00168312	0.0258292
ENSBTAG00000000877	530461	electron transfer flavoprotein subunit beta lysine methyltransferase [Source:VGNC Symbol;Acc:VGNC:28620]	ETFBKMT	-0.9783	-0.978867	3.27969	0.00168663	0.0258292
ENSBTAG00000008437	540115	protocadherin 12 [Source:VGNC Symbol;Acc:VGNC:32616]	PCDH12	2.41878	2.47879	-0.248327	0.00168734	0.0258292
ENSBTAG00000019028	506979	storkhead box 1 [Source:VGNC Symbol;Acc:VGNC:35414]	STOX1	1.31269	1.31434	3.41804	0.00168903	0.0258292
ENSBTAG00000013732	532626	G protein-coupled receptor 37 [Source:VGNC Symbol;Acc:VGNC:29585]	GPR37	2.06802	2.10922	0.545563	0.00168929	0.0258292
ENSBTAG00000014932	505899	arylsulfatase L [Source:VGNC Symbol;Acc:VGNC:55097]	ARSL	1.08025	1.0813	3.6544	0.0016938	0.0258676
ENSBTAG00000014683	516043	apolipoprotein B mRNA editing enzyme catalytic subunit 1 [Source:VGNC Symbol;Acc:VGNC:26027]	APOBEC1	3.09778	3.26527	-0.612364	0.00170414	0.0259952
ENSBTAG00000044007	100140477	Kruppel like factor 12 [Source:VGNC Symbol;Acc:VGNC:30628]	KLF12	-1.01468	-1.01648	1.59865	0.00170632	0.025998
ENSBTAG00000049042	#N/A	0	0	-1.17807	-1.18127	1.19638	0.00171495	0.0260989
ENSBTAG00000001675	615813	inositol-trisphosphate 3-kinase A [Source:VGNC Symbol;Acc:VGNC:30344]	ITPKA	2.02628	2.06088	0.559448	0.00172638	0.0262421
ENSBTAG00000000900	527708	leucine rich repeat containing 8 VRAC subunit C [Source:VGNC Symbol;Acc:VGNC:31031]	LRRC8C	0.922206	0.922385	6.17232	0.00173537	0.0263273
ENSBTAG00000002574	540487	myozenin 2 [Source:VGNC Symbol;Acc:VGNC:31841]	MYOZ2	1.36389	1.37245	0.773154	0.0017369	0.0263273
ENSBTAG00000023182	100337119	WNK lysine deficient protein kinase 3 [Source:VGNC Symbol;Acc:VGNC:36951]	WNK3	-1.2535	-1.25582	1.56886	0.00173805	0.0263273
ENSBTAG00000053238	540675	kalirin RhoGEF kinase [Source:NCBI gene (formerly Entrezgene);Acc:540675]	0	-1.21633	-1.21891	1.36497	0.0017415	0.026349
ENSBTAG00000015113	504742	Cbp/p300 interacting transactivator with Glu/Asp rich carboxy-terminal domain 4 [Source:VGNC Symbol;Acc:VGNC:27378]	CITED4	1.36162	1.3683	1.67104	0.00175158	0.0264708
ENSBTAG00000013674	281749	endothelin receptor type A [Source:VGNC Symbol;Acc:VGNC:28329]	EDNRA	1.99418	2.0435	-0.191994	0.00177437	0.0267841
ENSBTAG00000007102	507901	G2 and S-phase expressed 1 [Source:VGNC Symbol;Acc:VGNC:29711]	GTSE1	0.874984	0.875146	5.86051	0.00179421	0.0270523
ENSBTAG00000017260	536636	phosphodiesterase 3A [Source:VGNC Symbol;Acc:VGNC:54467]	PDE3A	-1.21071	-1.2116	2.89901	0.00180035	0.0271134
ENSBTAG00000008111	530157	extended synaptotagmin 3 [Source:VGNC Symbol;Acc:VGNC:28615]	ESYT3	0.977249	0.977941	4.18794	0.00182465	0.0274478
ENSBTAG00000005304	505916	spermidine synthase [Source:VGNC Symbol;Acc:VGNC:35282]	SRM	1.01805	1.01846	4.87249	0.00184008	0.0276479
ENSBTAG00000011600	535622	mitogen-activated protein kinase kinase kinase 8 [Source:VGNC Symbol;Acc:VGNC:31202]	MAP3K8	-0.982089	-0.983503	2.23968	0.00185753	0.027878
ENSBTAG00000048389	101907883	zinc finger protein 568 [Source:NCBI gene (formerly Entrezgene);Acc:101907883]	0	2.22492	2.30187	-0.226853	0.00186363	0.0279373
ENSBTAG00000004721	530502	germ cell associated 1 [Source:VGNC Symbol;Acc:VGNC:29676]	GSG1	3.00072	3.24312	-0.0743414	0.00187174	0.0280266
ENSBTAG00000033446	509365	TatD DNase domain containing 1 [Source:VGNC Symbol;Acc:VGNC:35617]	TATDN1	-0.889466	-0.889594	5.47113	0.0018842	0.0281808
ENSBTAG00000018469	327692	aldehyde dehydrogenase 6 family member A1 [Source:VGNC Symbol;Acc:VGNC:25817]	ALDH6A1	-0.824514	-0.82458	6.26384	0.00188691	0.028189
ENSBTAG00000030824	510525	trans-L-3-hydroxyproline dehydratase [Source:VGNC Symbol;Acc:VGNC:30762]	L3HYPDH	-0.936325	-0.937172	2.89675	0.00189431	0.0282671
ENSBTAG00000030333	281002	amine oxidase copper containing 3 [Source:NCBI gene (formerly Entrezgene);Acc:281002]	AOC3	1.63255	1.66147	-0.32858	0.00189799	0.0282896
ENSBTAG00000017418	510240	ribosomal RNA processing 1B [Source:VGNC Symbol;Acc:VGNC:34170]	RRP1B	0.796153	0.796292	6.00299	0.00190154	0.0283102
ENSBTAG00000018635	282598	ATPase Na+/K+ transporting subunit alpha 3 [Source:VGNC Symbol;Acc:VGNC:26283]	ATP1A3	4.82885	1.44269e+08	-0.515051	0.0019268	0.0286535
ENSBTAG00000016704	506687	solute carrier family 37 member 2 [Source:VGNC Symbol;Acc:VGNC:34843]	SLC37A2	1.15305	1.15636	2.23121	0.00192947	0.0286605
ENSBTAG00000009407	511415	mbt domain containing 1 [Source:VGNC Symbol;Acc:VGNC:31290]	MBTD1	-0.837496	-0.837828	3.97617	0.00193419	0.0286978
ENSBTAG00000013499	515012	LIM homeobox 9 [Source:VGNC Symbol;Acc:VGNC:30878]	LHX9	-0.956208	-0.957205	2.90845	0.00193842	0.0287279
ENSBTAG00000047132	#N/A	0	0	-1.59953	-1.63201	-0.916907	0.0019499	0.0288651
ENSBTAG00000011966	532572	laminin subunit gamma 1 [Source:VGNC Symbol;Acc:VGNC:50206]	LAMC1	0.833392	0.833396	10.9777	0.00199844	0.0295502
ENSBTAG00000008939	782347	dynamin binding protein [Source:VGNC Symbol;Acc:VGNC:28144]	DNMBP	-0.773362	-0.773442	6.00894	0.00202128	0.0298326
ENSBTAG00000021969	537141	kelch like family member 29 [Source:VGNC Symbol;Acc:VGNC:30656]	KLHL29	-1.14488	-1.14551	3.3083	0.00202212	0.0298326
ENSBTAG00000050814	529891	cilia and flagella associated protein 70 [Source:NCBI gene (formerly Entrezgene);Acc:529891]	CFAP70	-1.04305	-1.04444	2.09877	0.00202885	0.029898
ENSBTAG00000032567	112446679	complement C1q like 4 [Source:NCBI gene (formerly Entrezgene);Acc:112446679]	C1QL4	1.984	2.00637	0.591769	0.00206967	0.0304651
ENSBTAG00000031041	509157	non-homologous end joining factor 1 [Source:VGNC Symbol;Acc:VGNC:32064]	NHEJ1	-0.955724	-0.956367	3.09915	0.00210056	0.0308848
ENSBTAG00000017094	509002	serine hydroxymethyltransferase 1 [Source:VGNC Symbol;Acc:VGNC:34603]	SHMT1	1.26274	1.26556	2.03949	0.00212036	0.0311408
ENSBTAG00000004630	281088	cartilage oligomeric matrix protein [Source:VGNC Symbol;Acc:VGNC:27590]	COMP	2.79878	3.03647	-0.204491	0.00212447	0.0311661
ENSBTAG00000003925	100125289	chromosome 9 C6orf120 homolog [Source:VGNC Symbol;Acc:VGNC:53783]	C9H6orf120	-0.852771	-0.852856	6.01465	0.00213334	0.031261
ENSBTAG00000039335	523285	arrestin domain containing 2 [Source:VGNC Symbol;Acc:VGNC:26172]	ARRDC2	1.23225	1.2331	4.00231	0.00213591	0.0312635
ENSBTAG00000014127	282023	prostaglandin-endoperoxide synthase 2 [Source:VGNC Symbol;Acc:VGNC:33512]	PTGS2	1.5978	1.59859	6.62311	0.00215506	0.0315083
ENSBTAG00000016505	785640	transmembrane channel like 7 [Source:VGNC Symbol;Acc:VGNC:35923]	TMC7	1.24889	1.255	0.998625	0.00220077	0.0321353
ENSBTAG00000011027	513177	prostaglandin reductase 1 [Source:VGNC Symbol;Acc:VGNC:33510]	PTGR1	-0.820001	-0.820042	6.99105	0.00220287	0.0321353
ENSBTAG00000012193	537659	tetratricopeptide repeat domain 28 [Source:VGNC Symbol;Acc:VGNC:36467]	TTC28	-0.934973	-0.935307	3.95666	0.00220965	0.0321981
ENSBTAG00000017818	280863	myelin oligodendrocyte glycoprotein [Source:VGNC Symbol;Acc:VGNC:57316]	MOG	-1.13729	-1.13904	1.78245	0.00223361	0.0325109
ENSBTAG00000048628	100336796	hedgehog acyltransferase [Source:NCBI gene (formerly Entrezgene);Acc:100336796]	HHAT	-1.38782	-1.39304	0.485405	0.00226405	0.0329172
ENSBTAG00000018531	280821	joining chain of multimeric IgA and IgM [Source:VGNC Symbol;Acc:VGNC:30373]	JCHAIN	-1.147	-1.15275	0.244283	0.00228996	0.0332229
ENSBTAG00000046419	100297753	two pore channel 3 [Source:NCBI gene (formerly Entrezgene);Acc:100297753]	TPC3	-1.00531	-1.0066	2.15278	0.00229018	0.0332229
ENSBTAG00000001151	513154	amyloid beta precursor like protein 1 [Source:VGNC Symbol;Acc:VGNC:26019]	APLP1	0.921558	0.921907	4.78141	0.0022973	0.0332891
ENSBTAG00000053861	#N/A	0	0	-0.918651	-0.919461	2.7715	0.00232871	0.0337068
ENSBTAG00000001082	789769	SH2 domain containing 5 [Source:VGNC Symbol;Acc:VGNC:50133]	SH2D5	1.12746	1.12851	3.56807	0.00234954	0.0339706
ENSBTAG00000021752	541274	DnaJ heat shock protein family (Hsp40) member B4 [Source:VGNC Symbol;Acc:VGNC:55166]	DNAJB4	0.950412	0.950523	6.79088	0.00235281	0.0339801
ENSBTAG00000051211	615727	dual specificity phosphatase 8 [Source:NCBI gene (formerly Entrezgene);Acc:615727]	DUSP8	0.986277	0.986743	4.11941	0.00235727	0.0340005
ENSBTAG00000012104	503622	forkhead box A3 [Source:VGNC Symbol;Acc:VGNC:29079]	FOXA3	1.06874	1.07278	1.96037	0.00235944	0.0340005
ENSBTAG00000020481	507299	glucoside xylosyltransferase 2 [Source:VGNC Symbol;Acc:VGNC:29727]	GXYLT2	-0.974391	-0.975533	2.23349	0.00236972	0.0341108
ENSBTAG00000008993	540312	integrator complex subunit 6 like [Source:NCBI gene (formerly Entrezgene);Acc:540312]	0	-1.3522	-1.35687	0.814098	0.00238612	0.0342775
ENSBTAG00000010457	519892	NUAK family kinase 1 [Source:VGNC Symbol;Acc:VGNC:50006]	NUAK1	1.08662	1.08824	2.71556	0.00238879	0.0342775
ENSBTAG00000049226	#N/A	0	0	2.05922	2.13366	-0.815496	0.00238919	0.0342775
ENSBTAG00000012720	100847218	ankyrin repeat domain 2 [Source:VGNC Symbol;Acc:VGNC:25915]	ANKRD2	1.4298	1.43601	1.77726	0.00240711	0.0344967
ENSBTAG00000019822	614988	tubulin polymerization promoting protein family member 3 [Source:VGNC Symbol;Acc:VGNC:36260]	TPPP3	1.41106	1.41376	2.62202	0.00241258	0.034537
ENSBTAG00000030182	618906	mitogen-activated protein kinase 11 [Source:VGNC Symbol;Acc:VGNC:31214]	MAPK11	1.39111	1.39242	3.89683	0.00242297	0.0346477
ENSBTAG00000021805	512377	RAB5 interacting factor [Source:VGNC Symbol;Acc:VGNC:97306]	RAB5IF	0.844251	0.844329	6.94227	0.00243817	0.0348267
ENSBTAG00000001979	615711	TATA-box binding protein associated factor 7 like [Source:VGNC Symbol;Acc:VGNC:35580]	TAF7L	-1.68048	-1.69449	-0.0666938	0.00244545	0.0348926
ENSBTAG00000050449	#N/A	0	0	1.43742	1.45964	-0.486346	0.00245065	0.0349285
ENSBTAG00000053202	#N/A	0	0	1.6759	1.71008	-0.417899	0.00245678	0.0349776
ENSBTAG00000038011	615501	SH3 domain containing ring finger 3 [Source:VGNC Symbol;Acc:VGNC:34581]	SH3RF3	2.07479	2.10973	0.00643447	0.00254249	0.0361583
ENSBTAG00000016057	615329	cysteine and glycine rich protein 1 [Source:VGNC Symbol;Acc:VGNC:27773]	CSRP1	1.29384	1.29403	6.22624	0.00257673	0.0366054
ENSBTAG00000006910	767970	asparaginase and isoaspartyl peptidase 1 [Source:VGNC Symbol;Acc:VGNC:26223]	ASRGL1	0.77662	0.776646	8.26929	0.0025872	0.036714
ENSBTAG00000052297	#N/A	0	0	-1.3912	-1.39743	0.628877	0.00261416	0.0370562
ENSBTAG00000051267	#N/A	CASP2 and RIPK1 domain containing adaptor with death domain [Source:HGNC Symbol;Acc:HGNC:2340]	CRADD	-0.990549	-0.992789	1.37405	0.00269407	0.0381475
ENSBTAG00000021474	513939	gasdermin D [Source:VGNC Symbol;Acc:VGNC:29675]	GSDMD	1.22899	1.23071	3.30959	0.00269856	0.0381695
ENSBTAG00000007164	281769	fibroblast growth factor receptor 3 [Source:VGNC Symbol;Acc:VGNC:50180]	FGFR3	0.88664	0.887291	3.82285	0.00271692	0.0383876
ENSBTAG00000009770	504948	glycerol-3-phosphate dehydrogenase 2 [Source:VGNC Symbol;Acc:VGNC:29531]	GPD2	-0.792983	-0.793051	6.13866	0.00274989	0.038806
ENSBTAG00000036242	519915	Rieske Fe-S domain containing [Source:VGNC Symbol;Acc:VGNC:33890]	RFESD	-1.11736	-1.12186	0.893456	0.00275249	0.038806
ENSBTAG00000031849	510926	transmembrane protein 119 [Source:VGNC Symbol;Acc:VGNC:35955]	TMEM119	1.11094	1.11321	2.04273	0.00279599	0.0393766
ENSBTAG00000016494	505716	RELT TNF receptor [Source:VGNC Symbol;Acc:VGNC:33862]	RELT	1.66845	1.68427	0.975666	0.00281423	0.0395907
ENSBTAG00000006686	513362	nephronectin [Source:VGNC Symbol;Acc:VGNC:32209]	NPNT	-0.772145	-0.772213	6.2296	0.00282356	0.0396727
ENSBTAG00000000529	505504	BTB domain containing 9 [Source:VGNC Symbol;Acc:VGNC:54397]	BTBD9	-0.868665	-0.868831	4.9262	0.00282765	0.0396727
ENSBTAG00000003763	532574	myosin VC [Source:VGNC Symbol;Acc:VGNC:31828]	MYO5C	-0.957898	-0.958167	4.32595	0.0028292	0.0396727
ENSBTAG00000008626	408008	potassium calcium-activated channel subfamily N member 1 [Source:VGNC Symbol;Acc:VGNC:30483]	KCNN1	2.32918	2.39666	0.0565255	0.00283854	0.0397609
ENSBTAG00000052700	#N/A	0	0	-3.2181	-3.2432	0.517978	0.00285006	0.0398795
ENSBTAG00000054445	#N/A	0	0	-1.01383	-1.01658	1.15502	0.00286814	0.0400894
ENSBTAG00000000524	512805	cystatin B (stefin B) [Source:NCBI gene (formerly Entrezgene);Acc:512805]	CSTB	0.800816	0.800926	6.32116	0.00290805	0.0406036
ENSBTAG00000054797	#N/A	0	0	-0.951949	-0.952775	2.73351	0.0029219	0.0407373
ENSBTAG00000008948	286814	purinergic receptor P2X 7 [Source:VGNC Symbol;Acc:VGNC:32522]	P2RX7	1.01973	1.02156	2.82845	0.00292388	0.0407373
ENSBTAG00000012374	789553	mab-21 like 4 [Source:VGNC Symbol;Acc:VGNC:52718]	MAB21L4	2.8559	2.9563	-0.537288	0.00295715	0.0411569
ENSBTAG00000049289	#N/A	0	0	2.07106	2.11636	1.31628	0.00300949	0.0418002
ENSBTAG00000051588	784541	tumor necrosis factor receptor superfamily member 10A [Source:NCBI gene (formerly Entrezgene);Acc:784541]	0	0.936737	0.937193	4.65551	0.0030098	0.0418002
ENSBTAG00000021846	523793	cadherin EGF LAG seven-pass G-type receptor 3 [Source:VGNC Symbol;Acc:VGNC:27171]	CELSR3	1.03843	1.04183	1.6308	0.00301482	0.0418254
ENSBTAG00000054461	101904063	integrin subunit alpha X [Source:NCBI gene (formerly Entrezgene);Acc:101904063]	0	2.34211	2.42063	-0.113772	0.00304626	0.0422166
ENSBTAG00000052395	614631	transmembrane protein 95 [Source:NCBI gene (formerly Entrezgene);Acc:614631]	0	1.71335	1.73318	1.38364	0.00308212	0.0426682
ENSBTAG00000054697	#N/A	0	0	-0.974856	-0.975516	3.16687	0.00308951	0.0427251
ENSBTAG00000007129	281918	inositol 1,4,5-triphosphate receptor associated 1 [Source:NCBI gene (formerly Entrezgene);Acc:281918]	IRAG1	1.22351	1.22383	5.51209	0.00309641	0.0427751
ENSBTAG00000008250	504593	sprouty RTK signaling antagonist 4 [Source:VGNC Symbol;Acc:VGNC:35244]	SPRY4	1.32816	1.33464	1.76532	0.0031169	0.0430122
ENSBTAG00000021497	784716	cadherin related 23 [Source:NCBI gene (formerly Entrezgene);Acc:784716]	CDH23	-1.10481	-1.10549	3.02649	0.00312018	0.0430122
ENSBTAG00000007830	533312	pleckstrin homology domain containing M3 [Source:VGNC Symbol;Acc:VGNC:54470]	PLEKHM3	-1.05734	-1.06006	1.22352	0.00315409	0.0434338
ENSBTAG00000012377	617368	enoyl-CoA hydratase domain containing 3 [Source:VGNC Symbol;Acc:VGNC:28307]	ECHDC3	-0.918095	-0.918392	4.24306	0.00318919	0.0438708
ENSBTAG00000038462	618298	transmembrane protein 182 [Source:VGNC Symbol;Acc:VGNC:36008]	TMEM182	-1.53821	-1.55023	-0.207123	0.00319679	0.0439289
ENSBTAG00000018707	536781	LIM domain binding 3 [Source:VGNC Symbol;Acc:VGNC:30823]	LDB3	-1.28234	-1.29193	-0.355314	0.00320132	0.0439448
ENSBTAG00000011190	281165	filamin A [Source:VGNC Symbol;Acc:VGNC:29033]	FLNA	1.14207	1.14209	10.0656	0.00321131	0.0440326
ENSBTAG00000007583	404111	keratin 14 [Source:VGNC Symbol;Acc:VGNC:50205]	KRT14	1.74148	1.77629	-0.812375	0.00321448	0.0440326
ENSBTAG00000001021	282870	cytochrome P450, subfamily I (aromatic compound-inducible), polypeptide 1 [Source:NCBI gene (formerly Entrezgene);Acc:282870]	CYP1A1	1.21663	1.22393	1.66918	0.00324056	0.0443433
ENSBTAG00000026704	787125	centromere protein W [Source:VGNC Symbol;Acc:VGNC:27187]	CENPW	0.846532	0.846963	4.35113	0.00325041	0.044391
ENSBTAG00000004351	522636	interleukin 31 receptor A [Source:VGNC Symbol;Acc:VGNC:30154]	IL31RA	1.98726	2.03655	-0.0481192	0.00325272	0.044391
ENSBTAG00000018223	286869	chitinase 3 like 1 [Source:VGNC Symbol;Acc:VGNC:55039]	CHI3L1	-1.66091	-1.67184	0.0771533	0.00325427	0.044391
ENSBTAG00000017834	282000	proline and arginine rich end leucine rich repeat protein [Source:VGNC Symbol;Acc:VGNC:33309]	PRELP	-0.908409	-0.908479	6.08005	0.0032621	0.0444513
ENSBTAG00000051307	#N/A	0	0	-1.20145	-1.20307	2.07029	0.0032703	0.0445164
ENSBTAG00000022449	617419	stearoyl-CoA desaturase 5 [Source:VGNC Symbol;Acc:VGNC:34328]	SCD5	-0.813368	-0.813564	4.48929	0.00328121	0.0446182
ENSBTAG00000014922	538275	SH2 domain containing adaptor protein B [Source:VGNC Symbol;Acc:VGNC:34588]	SHB	1.04423	1.04476	4.2167	0.00329553	0.0447663
ENSBTAG00000004999	510651	retroelement silencing factor 1 [Source:VGNC Symbol;Acc:VGNC:30572]	RESF1	-0.946285	-0.946322	7.28974	0.00330559	0.0448562
ENSBTAG00000009223	528453	stratifin [Source:VGNC Symbol;Acc:VGNC:34517]	SFN	1.93666	1.99894	-0.823429	0.00331172	0.0448628
ENSBTAG00000050386	616091	O-6-methylguanine-DNA methyltransferase [Source:NCBI gene (formerly Entrezgene);Acc:616091]	MGMT	-1.02657	-1.0282	1.75202	0.00331297	0.0448628
ENSBTAG00000014880	507857	inducible T cell costimulator ligand [Source:NCBI gene (formerly Entrezgene);Acc:507857]	0	1.04062	1.04079	5.95347	0.00333083	0.0450579
ENSBTAG00000040551	526903	zinc finger and BTB domain containing 1 [Source:VGNC Symbol;Acc:VGNC:37057]	ZBTB1	-0.857994	-0.858088	5.86331	0.00335076	0.0452805
ENSBTAG00000005866	#N/A	zinc finger protein 81 [Source:VGNC Symbol;Acc:VGNC:37352]	ZNF81	-1.23791	-1.24689	-0.200938	0.00337698	0.0455875
ENSBTAG00000010622	535897	tripartite motif containing 46 [Source:VGNC Symbol;Acc:VGNC:36338]	TRIM46	1.1748	1.1796	1.27553	0.00338991	0.0457146
ENSBTAG00000049936	#N/A	0	0	1.99427	2.0348	-0.237696	0.00340279	0.0458409
ENSBTAG00000020267	511308	Wnt family member 9A [Source:VGNC Symbol;Acc:VGNC:36966]	WNT9A	1.294	1.30209	1.3608	0.00341834	0.0460029
ENSBTAG00000004386	518795	suppressor of cytokine signaling 1 [Source:VGNC Symbol;Acc:VGNC:35119]	SOCS1	1.54205	1.57219	-0.659003	0.00343356	0.04616
ENSBTAG00000021658	507181	trafficking regulator and scaffold protein tamalin [Source:VGNC Symbol;Acc:VGNC:29628]	TAMALIN	1.10038	1.10435	1.97669	0.00344131	0.0462165
ENSBTAG00000017536	508710	membrane palmitoylated protein 3 [Source:VGNC Symbol;Acc:VGNC:55850]	MPP3	1.5407	1.57083	-0.22488	0.00346349	0.0464664
ENSBTAG00000013452	516762	aquaporin 9 [Source:VGNC Symbol;Acc:VGNC:26051]	AQP9	-1.09962	-1.10085	3.69089	0.00348925	0.0467639
ENSBTAG00000037703	517259	MICAL like 1 [Source:VGNC Symbol;Acc:VGNC:52803]	MICALL1	0.971691	0.971795	6.57244	0.00350934	0.0469847
ENSBTAG00000008448	613877	Meis homeobox 1 [Source:VGNC Symbol;Acc:VGNC:31381]	MEIS1	-0.804717	-0.804793	6.05844	0.00353013	0.0472146
ENSBTAG00000038891	#N/A	0	0	1.52751	1.54707	0.291624	0.0035419	0.0473234
ENSBTAG00000025809	768306	abhydrolase domain containing 8 [Source:VGNC Symbol;Acc:VGNC:25504]	ABHD8	1.46258	1.46341	4.64972	0.0035495	0.0473764
ENSBTAG00000037964	538911	H2A.W histone [Source:VGNC Symbol;Acc:VGNC:83612]	H2AW	-1.99965	-2.02998	-0.89653	0.00361337	0.0481795
ENSBTAG00000000818	519417	pleckstrin homology and RhoGEF domain containing G7 [Source:VGNC Symbol;Acc:VGNC:56225]	PLEKHG7	-1.38561	-1.39199	0.545119	0.00361727	0.0481822
ENSBTAG00000052791	517192	JunD proto-oncogene, AP-1 transcription factor subunit [Source:NCBI gene (formerly Entrezgene);Acc:517192]	JUND	0.82742	0.827587	5.46148	0.00363366	0.0483511
ENSBTAG00000006368	513032	NEDD4 binding protein 3 [Source:VGNC Symbol;Acc:VGNC:31853]	N4BP3	1.28216	1.28665	2.16502	0.00365857	0.0486328
ENSBTAG00000017242	523867	fatty acid desaturase 6 [Source:VGNC Symbol;Acc:VGNC:28704]	FADS6	1.81377	1.85629	-0.467331	0.00369031	0.0490047
ENSBTAG00000054911	107131193	anoctamin 9 [Source:NCBI gene (formerly Entrezgene);Acc:107131193]	ANO9	0.889933	0.890189	5.07868	0.00370225	0.0491132
ENSBTAG00000004971	505581	GRAM domain containing 1C [Source:VGNC Symbol;Acc:VGNC:29624]	GRAMD1C	-0.993411	-0.994756	2.14365	0.0037347	0.0494933
ENSBTAG00000053295	#N/A	0	0	2.14202	2.21778	-0.903887	0.00377583	0.0499566
ENSBTAG00000009849	509228	placenta specific 8 A [Source:VGNC Symbol;Acc:VGNC:96878]	PLAC8A	2.96974	3.13529	0.379611	0.00377733	0.0499566
ENSBTAG00000010944	511727	leucine rich repeat containing 49 [Source:VGNC Symbol;Acc:VGNC:55120]	LRRC49	-0.860128	-0.860444	4.02088	0.00378395	0.0499934
ENSBTAG00000045097	112449628	0	0	1.37086	1.38356	0.273001	0.00380308	0.0501953
ENSBTAG00000005657	614606	calcium/calmodulin dependent protein kinase II inhibitor 2 [Source:VGNC Symbol;Acc:VGNC:26724]	CAMK2N2	1.09698	1.09934	2.17119	0.00380862	0.0502175
ENSBTAG00000004553	535277	tropomyosin 4 [Source:VGNC Symbol;Acc:VGNC:36254]	TPM4	0.843342	0.843345	11.3145	0.0038157	0.05026
ENSBTAG00000048331	513508	acyl-CoA dehydrogenase family member 10 [Source:NCBI gene (formerly Entrezgene);Acc:513508]	0	-0.917369	-0.918057	2.94074	0.0038358	0.0504737
ENSBTAG00000005466	101902190	chromosome 8 C8orf58 homolog [Source:NCBI gene (formerly Entrezgene);Acc:101902190]	0	1.50095	1.51271	1.00018	0.00384721	0.0505727
ENSBTAG00000014685	281229	hypoxanthine phosphoribosyltransferase 1 [Source:NCBI gene (formerly Entrezgene);Acc:281229]	HPRT1	-0.899381	-0.899391	9.14623	0.003866	0.0507686
ENSBTAG00000048152	541101	tubulin gamma 1 [Source:VGNC Symbol;Acc:VGNC:49987]	TUBG1	0.959044	0.959201	6.08138	0.00391357	0.0513414
ENSBTAG00000002020	513587	CREB3 regulatory factor [Source:VGNC Symbol;Acc:VGNC:27700]	CREBRF	-0.881203	-0.882017	2.74084	0.00392972	0.0515015
ENSBTAG00000013929	505165	RRAD, Ras related glycolysis inhibitor and calcium channel regulator [Source:VGNC Symbol;Acc:VGNC:34158]	RRAD	1.95585	2.00001	0.14376	0.00394312	0.0516252
ENSBTAG00000022583	524734	SHC adaptor protein 4 [Source:NCBI gene (formerly Entrezgene);Acc:524734]	SHC4	-1.26221	-1.26785	0.345563	0.00395895	0.0517803
ENSBTAG00000003474	614507	RAB15, member RAS oncogene family [Source:VGNC Symbol;Acc:VGNC:33623]	RAB15	0.955245	0.957392	2.20205	0.00398198	0.0520293
ENSBTAG00000004650	519449	zinc finger protein 516 [Source:VGNC Symbol;Acc:VGNC:37294]	ZNF516	-0.984539	-0.986217	1.77339	0.0039964	0.0521655
ENSBTAG00000009396	506390	exonuclease 1 [Source:VGNC Symbol;Acc:VGNC:28642]	EXO1	0.807263	0.807412	5.62854	0.00403752	0.0526138
ENSBTAG00000004976	514631	cell division cycle associated 7 like [Source:VGNC Symbol;Acc:VGNC:27087]	CDCA7L	-0.806724	-0.806774	6.68751	0.00403882	0.0526138
ENSBTAG00000020119	784035	ring finger protein 43 [Source:VGNC Symbol;Acc:VGNC:34068]	RNF43	0.905692	0.906439	3.44452	0.00405595	0.052784
ENSBTAG00000007632	535260	family with sequence similarity 151 member B [Source:VGNC Symbol;Acc:VGNC:28734]	FAM151B	-0.976192	-0.976625	3.86559	0.00409024	0.0531771
ENSBTAG00000007149	516993	NYN domain and retroviral integrase containing [Source:VGNC Symbol;Acc:VGNC:32387]	NYNRIN	-0.919131	-0.919463	4.0122	0.00410349	0.0532963
ENSBTAG00000010916	540541	LHFPL tetraspan subfamily member 4 [Source:VGNC Symbol;Acc:VGNC:30867]	LHFPL4	1.30379	1.31373	0.654383	0.00412585	0.0535019
ENSBTAG00000008100	767832	golgin A7 family member B [Source:VGNC Symbol;Acc:VGNC:29488]	GOLGA7B	-1.44217	-1.45322	-0.247695	0.00412795	0.0535019
ENSBTAG00000047786	520410	leucine rich repeat containing 10B [Source:VGNC Symbol;Acc:VGNC:52797]	LRRC10B	1.56535	1.59172	-0.213949	0.00413164	0.0535019
ENSBTAG00000039132	#N/A	0	0	-0.903759	-0.904071	4.04959	0.00417363	0.053992
ENSBTAG00000011659	104968672	phosphatidylinositol glycan anchor biosynthesis class Z [Source:VGNC Symbol;Acc:VGNC:32882]	PIGZ	1.23907	1.24433	1.35253	0.00418107	0.0540346
ENSBTAG00000020257	615850	protein tyrosine phosphatase non-receptor type 5 [Source:VGNC Symbol;Acc:VGNC:33540]	PTPN5	1.47693	1.49172	-0.055307	0.00420075	0.0542351
ENSBTAG00000008371	511007	F-box and leucine rich repeat protein 20 [Source:VGNC Symbol;Acc:VGNC:52776]	FBXL20	-0.881137	-0.881422	4.31546	0.00422708	0.054521
ENSBTAG00000019498	508490	integrin subunit alpha 3 [Source:VGNC Symbol;Acc:VGNC:30315]	ITGA3	0.905203	0.905227	8.79999	0.0042355	0.0545756
ENSBTAG00000010670	520493	V-set and immunoglobulin domain containing 8 [Source:VGNC Symbol;Acc:VGNC:55697]	VSIG8	1.67235	1.69023	0.659437	0.00424039	0.0545846
ENSBTAG00000052771	#N/A	0	0	-1.17178	-1.1769	0.392972	0.00429277	0.0552043
ENSBTAG00000007703	282049	N-myristoyltransferase 2 [Source:VGNC Symbol;Acc:VGNC:32138]	NMT2	0.805783	0.805907	6.00961	0.00433194	0.055653
ENSBTAG00000001808	535021	lactamase beta 2 [Source:VGNC Symbol;Acc:VGNC:30765]	LACTB2	-0.859061	-0.859512	3.53784	0.00434218	0.0557296
ENSBTAG00000000670	614025	ribosomal RNA processing 9, U3 small nucleolar RNA binding protein [Source:VGNC Symbol;Acc:VGNC:34172]	RRP9	1.01175	1.0127	3.80305	0.0043637	0.0559507
ENSBTAG00000015939	533492	nectin cell adhesion molecule 1 [Source:VGNC Symbol;Acc:VGNC:54888]	NECTIN1	0.907515	0.907715	5.52542	0.0043793	0.056072
ENSBTAG00000003447	#N/A	0	0	-0.992262	-0.993238	2.62324	0.00438177	0.056072
ENSBTAG00000038292	618155	chromosome 3 C1orf216 homolog [Source:VGNC Symbol;Acc:VGNC:52711]	C3H1orf216	1.22246	1.22717	1.81537	0.00438831	0.0561006
ENSBTAG00000006326	516864	aldehyde dehydrogenase 1 family member L2 [Source:VGNC Symbol;Acc:VGNC:25812]	ALDH1L2	-0.832704	-0.832736	7.05832	0.00442928	0.0565688
ENSBTAG00000016294	510512	zinc finger protein 438 [Source:VGNC Symbol;Acc:VGNC:37276]	ZNF438	-1.04192	-1.04324	2.09022	0.00448374	0.0571629
ENSBTAG00000009451	531476	Jun dimerization protein 2 [Source:VGNC Symbol;Acc:VGNC:30374]	JDP2	-0.853239	-0.853327	5.68641	0.00448457	0.0571629
ENSBTAG00000003054	787068	insulin receptor related receptor [Source:VGNC Symbol;Acc:VGNC:30222]	INSRR	1.56622	1.59665	-0.552022	0.00450993	0.05743
ENSBTAG00000016943	781355	NIMA related kinase 7 [Source:VGNC Symbol;Acc:VGNC:31998]	NEK7	-0.804229	-0.804268	6.94856	0.00452074	0.0575114
ENSBTAG00000030179	618893	mitogen-activated protein kinase 8 interacting protein 2 [Source:VGNC Symbol;Acc:VGNC:31225]	MAPK8IP2	1.22582	1.22813	2.5246	0.00455115	0.0578418
ENSBTAG00000014171	541291	N-acyl phosphatidylethanolamine phospholipase D [Source:VGNC Symbol;Acc:VGNC:31883]	NAPEPLD	-0.828491	-0.829072	3.09923	0.00460167	0.0584269
ENSBTAG00000044092	506290	IQ motif containing K [Source:VGNC Symbol;Acc:VGNC:58601]	IQCK	-0.908835	-0.909219	3.67696	0.00463049	0.0587355
ENSBTAG00000005504	511340	tumor protein p53 inducible nuclear protein 2 [Source:VGNC Symbol;Acc:VGNC:36237]	TP53INP2	0.897666	0.898214	4.16938	0.00466877	0.0591634
ENSBTAG00000001086	510008	four and a half LIM domains 2 [Source:VGNC Symbol;Acc:VGNC:29000]	FHL2	1.0096	1.00978	6.13055	0.00468095	0.0592602
ENSBTAG00000011139	534616	butyrylcholinesterase [Source:VGNC Symbol;Acc:VGNC:26443]	BCHE	-1.11585	-1.11933	0.89353	0.0046855	0.0592602
ENSBTAG00000013004	534787	inter-alpha-trypsin inhibitor heavy chain 5 [Source:VGNC Symbol;Acc:VGNC:30337]	ITIH5	-1.2068	-1.20701	4.95461	0.00469997	0.0593855
ENSBTAG00000002219	784353	ATPase family, AAA domain containing 3A [Source:NCBI gene (formerly Entrezgene);Acc:784353]	ATAD3A	0.96741	0.96777	5.05052	0.00470811	0.0594308
ENSBTAG00000000720	515200	cathepsin L [Source:NCBI gene (formerly Entrezgene);Acc:515200]	CTSL	0.966213	0.966681	4.35023	0.004717	0.0594854
ENSBTAG00000008931	530908	cellular repressor of E1A stimulated genes 1 [Source:VGNC Symbol;Acc:VGNC:27702]	CREG1	-0.793346	-0.793422	6.18243	0.00472809	0.0595675
ENSBTAG00000001781	510219	translocase of outer mitochondrial membrane 40 [Source:VGNC Symbol;Acc:VGNC:49148]	TOMM40	0.925841	0.926049	5.64992	0.00483673	0.0608774
ENSBTAG00000040132	539380	PWWP domain containing 3B [Source:VGNC Symbol;Acc:VGNC:31761]	PWWP3B	-1.04707	-1.04882	1.83853	0.00484169	0.060881
ENSBTAG00000051732	#N/A	0	0	-1.55223	-1.56152	0.14697	0.00493743	0.062025
ENSBTAG00000008138	524150	homeobox A2 [Source:VGNC Symbol;Acc:VGNC:29910]	HOXA2	-1.12383	-1.12562	1.99519	0.00497834	0.0624237
ENSBTAG00000006158	537349	DAZ interacting zinc finger protein 3 [Source:VGNC Symbol;Acc:VGNC:28285]	DZIP3	-0.939978	-0.940831	2.58669	0.00497875	0.0624237
ENSBTAG00000046869	517087	ribonuclease/angiogenin inhibitor 1 [Source:NCBI gene (formerly Entrezgene);Acc:517087]	RNH1	1.20465	1.20498	5.35335	0.00498715	0.0624553
ENSBTAG00000009945	100139898	BRICHOS domain containing 5 [Source:VGNC Symbol;Acc:VGNC:26566]	BRICD5	1.93215	1.99441	-0.796224	0.00499378	0.0624553
ENSBTAG00000012291	618784	TBC1 domain family member 22A [Source:VGNC Symbol;Acc:VGNC:35636]	TBC1D22A	-0.927878	-0.928791	2.52719	0.00499566	0.0624553
ENSBTAG00000051675	100297185	chromosome 15 open reading frame 65 [Source:HGNC Symbol;Acc:HGNC:44654]	C15orf65	-1.0873	-1.09172	0.715098	0.00501075	0.0625839
ENSBTAG00000019980	530095	diacylglycerol kinase iota [Source:VGNC Symbol;Acc:VGNC:28030]	DGKI	1.5559	1.58054	0.261555	0.00506641	0.0632185
ENSBTAG00000004599	515562	transgelin 3 [Source:VGNC Symbol;Acc:VGNC:35587]	TAGLN3	1.50684	1.54195	-0.0546869	0.00508672	0.0634113
ENSBTAG00000052725	#N/A	bta-mir-11997 [Source:miRBase;Acc:MI0038377]	bta-mir-11997	-1.0111	-1.01214	2.46224	0.00510801	0.0636158
ENSBTAG00000010366	282248	hypocretin receptor 1 [Source:VGNC Symbol;Acc:VGNC:29781]	HCRTR1	1.04824	1.04915	3.25171	0.00511959	0.063699
ENSBTAG00000003981	512925	ribosomal RNA processing 1 [Source:VGNC Symbol;Acc:VGNC:34168]	RRP1	0.930061	0.930359	5.35528	0.00512612	0.063699
ENSBTAG00000030319	618517	globoside alpha-1,3-N-acetylgalactosaminyltransferase 1 [Source:VGNC Symbol;Acc:VGNC:59217]	GBGT1	1.09402	1.09496	3.77726	0.00512937	0.063699
ENSBTAG00000004613	528057	chondroitin sulfate N-acetylgalactosaminyltransferase 1 [Source:VGNC Symbol;Acc:VGNC:27759]	CSGALNACT1	-1.29974	-1.30288	1.01837	0.00519267	0.0643637
ENSBTAG00000018255	524770	actinin alpha 1 [Source:VGNC Symbol;Acc:VGNC:25581]	ACTN1	0.8383	0.838309	9.65622	0.00519482	0.0643637
ENSBTAG00000053804	#N/A	0	0	1.52573	1.55358	0.0457137	0.00520265	0.0643637
ENSBTAG00000002435	505285	protein tyrosine phosphatase receptor type E [Source:VGNC Symbol;Acc:VGNC:33549]	PTPRE	0.758718	0.758919	5.29934	0.00520266	0.0643637
ENSBTAG00000018796	516619	Rab geranylgeranyltransferase subunit alpha [Source:VGNC Symbol;Acc:VGNC:33670]	RABGGTA	1.00295	1.00324	5.468	0.00520989	0.0643921
ENSBTAG00000000046	526046	surfeit 2 [Source:VGNC Symbol;Acc:VGNC:35484]	SURF2	1.16465	1.17011	1.69838	0.00523862	0.0646858
ENSBTAG00000001293	100300968	cilia and flagella associated protein 91 [Source:VGNC Symbol;Acc:VGNC:31126]	CFAP91	-1.05152	-1.05377	1.40232	0.00528958	0.0651814
ENSBTAG00000006806	281889	keratin 17 [Source:VGNC Symbol;Acc:VGNC:50398]	KRT17	1.36812	1.37521	1.07462	0.00529264	0.0651814
ENSBTAG00000014719	780784	tropomodulin 1 [Source:VGNC Symbol;Acc:VGNC:36135]	TMOD1	-1.28327	-1.28698	1.30047	0.00529377	0.0651814
ENSBTAG00000049524	#N/A	0	0	1.35292	1.36281	0.822785	0.00532268	0.0654755
ENSBTAG00000021160	515766	adaptor related protein complex 1 subunit mu 2 [Source:VGNC Symbol;Acc:VGNC:25980]	AP1M2	1.32193	1.33355	0.432888	0.00533065	0.0655117
ENSBTAG00000035064	614195	chromosome 4 C7orf57 homolog [Source:NCBI gene (formerly Entrezgene);Acc:614195]	C4H7orf57	0.932023	0.932426	4.72617	0.00533697	0.0655275
ENSBTAG00000011316	535344	zinc finger CCCH-type containing 12A [Source:VGNC Symbol;Acc:VGNC:37097]	ZC3H12A	1.17783	1.18277	1.92793	0.00539791	0.0662133
ENSBTAG00000025398	504548	ubiquitin D [Source:NCBI gene (formerly Entrezgene);Acc:504548]	0	1.38247	1.39726	0.568339	0.00551449	0.0675257
ENSBTAG00000014512	533633	WD repeat domain 19 [Source:VGNC Symbol;Acc:VGNC:36886]	WDR19	-0.749616	-0.74968	6.22715	0.00551572	0.0675257
ENSBTAG00000007741	511086	cytokine receptor like factor 1 [Source:VGNC Symbol;Acc:VGNC:27717]	CRLF1	1.42235	1.43281	1.29249	0.00552045	0.0675257
ENSBTAG00000026309	515040	zinc fingers and homeoboxes 2 [Source:VGNC Symbol;Acc:VGNC:37183]	ZHX2	-1.11121	-1.11328	1.63671	0.00554714	0.0677224
ENSBTAG00000052022	#N/A	0	0	1.60336	1.64326	-0.320468	0.00554896	0.0677224
ENSBTAG00000017676	788066	thiamin pyrophosphokinase 1 [Source:VGNC Symbol;Acc:VGNC:36251]	TPK1	-0.942199	-0.942888	3.02755	0.00555467	0.0677224
ENSBTAG00000015952	282176	ArfGAP with dual PH domains 1 [Source:VGNC Symbol;Acc:VGNC:25633]	ADAP1	1.38904	1.39217	2.52321	0.00555732	0.0677224
ENSBTAG00000054197	#N/A	protocadherin gamma subfamily C, 4 [Source:HGNC Symbol;Acc:HGNC:8717]	PCDHGC4	0.969473	0.971366	2.17985	0.005571	0.0678256
ENSBTAG00000019585	538404	myomesin 1 [Source:VGNC Symbol;Acc:VGNC:50225]	MYOM1	-1.20222	-1.20861	0.0584909	0.00558324	0.0678555
ENSBTAG00000011636	#N/A	DNA damage induced apoptosis suppressor [Source:VGNC Symbol;Acc:VGNC:27946]	DDIAS	0.878874	0.878923	7.56047	0.00558387	0.0678555
ENSBTAG00000002605	100848152	tripartite motif containing 16 [Source:NCBI gene (formerly Entrezgene);Acc:100848152]	0	1.07245	1.07533	2.08666	0.00564203	0.0684983
ENSBTAG00000013736	618054	prominin 1 [Source:VGNC Symbol;Acc:VGNC:33364]	PROM1	0.832724	0.832837	5.98114	0.00566869	0.0687579
ENSBTAG00000013931	614585	cytosolic iron-sulfur assembly component 2B [Source:VGNC Symbol;Acc:VGNC:28847]	CIAO2B	0.8101	0.810312	5.54633	0.00570854	0.0691769
ENSBTAG00000003990	538685	inositol 1,4,5-trisphosphate receptor interacting protein [Source:VGNC Symbol;Acc:VGNC:30349]	ITPRIP	0.776009	0.776207	5.4768	0.00576374	0.0697808
ENSBTAG00000054651	#N/A	0	0	-1.27799	-1.28876	-0.605112	0.00578145	0.0699303
ENSBTAG00000049285	784268	TNF receptor superfamily member 17 [Source:NCBI gene (formerly Entrezgene);Acc:784268]	TNFRSF17	-1.4847	-1.50091	-0.686021	0.00579543	0.0700344
ENSBTAG00000002080	505727	cellular communication network factor 3 [Source:VGNC Symbol;Acc:VGNC:57785]	CCN3	0.783891	0.7839	9.53284	0.0058165	0.0702238
ENSBTAG00000051936	#N/A	0	0	-1.08347	-1.08665	0.845533	0.0058877	0.0710177
ENSBTAG00000000109	#N/A	neuronal pentraxin receptor [Source:VGNC Symbol;Acc:VGNC:32220]	NPTXR	0.769685	0.7697	8.88942	0.00592659	0.0713881
ENSBTAG00000004272	617420	TLH29 protein precursor-like [Source:NCBI gene (formerly Entrezgene);Acc:617420]	ISG12(B)	1.92739	1.97595	-0.0696565	0.00592937	0.0713881
ENSBTAG00000016771	539449	polo like kinase 2 [Source:VGNC Symbol;Acc:VGNC:33034]	PLK2	0.900028	0.900065	8.41655	0.00601339	0.0723328
ENSBTAG00000020998	511475	RuvB like AAA ATPase 1 [Source:VGNC Symbol;Acc:VGNC:34223]	RUVBL1	0.841568	0.841648	6.79557	0.0061483	0.0738874
ENSBTAG00000004194	513723	ral guanine nucleotide dissociation stimulator [Source:NCBI gene (formerly Entrezgene);Acc:513723]	RALGDS	0.928409	0.928755	4.59435	0.00617824	0.0741753
ENSBTAG00000016260	535652	leucine rich repeat kinase 2 [Source:VGNC Symbol;Acc:VGNC:31038]	LRRK2	-0.829825	-0.830314	3.44197	0.00618365	0.0741753
ENSBTAG00000001314	505816	tRNA methyltransferase 6 [Source:VGNC Symbol;Acc:VGNC:36374]	TRMT6	0.777623	0.777813	5.54491	0.0062311	0.0746758
ENSBTAG00000010740	281698	clathrin light chain B [Source:VGNC Symbol;Acc:VGNC:27470]	CLTB	0.9592	0.959525	4.82729	0.00625677	0.0749144
ENSBTAG00000019289	281872	integrin subunit alpha 2 [Source:VGNC Symbol;Acc:VGNC:30313]	ITGA2	0.889203	0.889519	5.26883	0.00629279	0.0752766
ENSBTAG00000016109	507276	dehydrogenase/reductase 12 [Source:VGNC Symbol;Acc:VGNC:28041]	DHRS12	-0.948361	-0.949061	2.85402	0.00631561	0.0754802
ENSBTAG00000014031	407237	toll like receptor 6 [Source:VGNC Symbol;Acc:VGNC:50030]	TLR6	-1.04263	-1.04551	1.25036	0.00638835	0.0762796
ENSBTAG00000048804	112441476	Bos taurus cupin superfamily member 1 (CUPIN1), mRNA. [Source:RefSeq mRNA;Acc:NM_001371792]	CUPIN1	-1.44199	-1.45275	-0.236654	0.00641797	0.0765474
ENSBTAG00000003751	521867	MET transcriptional regulator MACC1 [Source:VGNC Symbol;Acc:VGNC:53651]	MACC1	-1.03875	-1.03894	5.1009	0.00642253	0.0765474
ENSBTAG00000007348	515911	signaling receptor and transporter of retinol STRA6 [Source:VGNC Symbol;Acc:VGNC:35417]	STRA6	1.49298	1.49512	3.73484	0.00642911	0.0765558
ENSBTAG00000005378	524975	XK related X-linked [Source:VGNC Symbol;Acc:VGNC:56961]	XKRX	-1.05825	-1.06546	-0.0616406	0.00644115	0.0766291
ENSBTAG00000018920	618638	tripartite motif containing 47 [Source:VGNC Symbol;Acc:VGNC:36339]	TRIM47	0.955659	0.957429	2.67074	0.00645385	0.0767101
ENSBTAG00000017069	617515	golgi associated kinase 1B [Source:VGNC Symbol;Acc:VGNC:53900]	GASK1B	1.2322	1.23434	2.71358	0.00650148	0.0772058
ENSBTAG00000002039	515469	FERM domain containing 8 [Source:VGNC Symbol;Acc:VGNC:56264]	FRMD8	0.792297	0.792463	5.69503	0.00651354	0.0772142
ENSBTAG00000010276	515472	RecQ like helicase 4 [Source:VGNC Symbol;Acc:VGNC:33849]	RECQL4	1.09433	1.09499	4.07705	0.00651404	0.0772142
ENSBTAG00000018041	504301	acyl-CoA dehydrogenase short/branched chain [Source:VGNC Symbol;Acc:VGNC:50245]	ACADSB	-0.834725	-0.834936	4.55643	0.00653604	0.0774045
ENSBTAG00000007659	617620	coronin 2A [Source:VGNC Symbol;Acc:VGNC:27623]	CORO2A	0.720061	0.720159	6.28982	0.00655265	0.07747
ENSBTAG00000030393	508082	retinol dehydrogenase 13 [Source:VGNC Symbol;Acc:VGNC:33842]	RDH13	0.814825	0.815275	4.40616	0.00655682	0.07747
ENSBTAG00000008612	511581	complement C1r [Source:VGNC Symbol;Acc:VGNC:56194]	C1R	-0.934425	-0.934645	4.57091	0.00655941	0.07747
ENSBTAG00000018837	615681	solute carrier family 39 member 11 [Source:VGNC Symbol;Acc:VGNC:34859]	SLC39A11	-0.814477	-0.814694	4.37433	0.00656852	0.0775073
ENSBTAG00000038079	781721	chromosome 16 C1orf21 homolog [Source:NCBI gene (formerly Entrezgene);Acc:781721]	C16H1orf21	-1.04024	-1.04198	1.97843	0.006675	0.0786925
ENSBTAG00000019091	768060	RNA binding region (RNP1, RRM) containing 3 [Source:NCBI gene (formerly Entrezgene);Acc:768060]	RNPC3	-0.856665	-0.856882	4.73792	0.00675405	0.0795524
ENSBTAG00000020243	781282	sushi, von Willebrand factor type A, EGF and pentraxin domain containing 1 [Source:VGNC Symbol;Acc:VGNC:56985]	SVEP1	-0.969695	-0.970996	2.09222	0.00678188	0.0798081
ENSBTAG00000038865	533803	transcription elongation factor A3 [Source:VGNC Symbol;Acc:VGNC:35681]	TCEA3	1.35059	1.35411	1.94927	0.00680319	0.0799866
ENSBTAG00000018705	535603	adenylate cyclase 3 [Source:VGNC Symbol;Acc:VGNC:25644]	ADCY3	0.782702	0.782915	5.20291	0.0068225	0.0801413
ENSBTAG00000055263	#N/A	0	0	1.75205	1.79838	-0.834406	0.00685219	0.0804176
ENSBTAG00000012745	522370	peter pan homolog (Drosophila) [Source:NCBI gene (formerly Entrezgene);Acc:522370]	PPAN	0.923679	0.924426	3.9999	0.00687109	0.0805667
ENSBTAG00000032709	510145	CKLF like MARVEL transmembrane domain containing 5 [Source:VGNC Symbol;Acc:VGNC:27485]	CMTM5	1.93068	2.03786	-0.547622	0.00691977	0.0810646
ENSBTAG00000005745	281230	heparanase [Source:VGNC Symbol;Acc:VGNC:29948]	HPSE	-1.03011	-1.03199	1.60072	0.006958	0.0814393
ENSBTAG00000010799	281341	myosin light chain 6 [Source:VGNC Symbol;Acc:VGNC:50223]	MYL6	0.812611	0.812619	10.0572	0.00697212	0.0815312
ENSBTAG00000054238	#N/A	0	0	-1.02943	-1.03147	1.40471	0.00698453	0.0816031
ENSBTAG00000009562	508477	zinc finger protein 593 [Source:VGNC Symbol;Acc:VGNC:56158]	ZNF593	0.970775	0.972176	3.21944	0.00700807	0.0818048
ENSBTAG00000003456	#N/A	zinc finger protein 606 [Source:VGNC Symbol;Acc:VGNC:52278]	ZNF606	-0.85647	-0.856714	4.50534	0.00706896	0.0824155
ENSBTAG00000020035	539640	regulator of calcineurin 1 [Source:VGNC Symbol;Acc:VGNC:33820]	RCAN1	-0.86858	-0.869724	2.50045	0.00707304	0.0824155
ENSBTAG00000047262	101905591	keratin 42 [Source:VGNC Symbol;Acc:VGNC:50431]	KRT42	1.21775	1.22024	2.12498	0.00709922	0.0826465
ENSBTAG00000020658	540694	ligand of numb-protein X 1 [Source:VGNC Symbol;Acc:VGNC:50212]	LNX1	-1.03323	-1.03681	0.915794	0.00711229	0.0827248
ENSBTAG00000004330	767880	enolase 4 [Source:VGNC Symbol;Acc:VGNC:28499]	ENO4	-0.885097	-0.886123	2.48412	0.00715783	0.0831802
ENSBTAG00000005442	535410	dynein axonemal intermediate chain 4 [Source:VGNC Symbol;Acc:VGNC:36922]	DNAI4	-1.16969	-1.17626	0.327102	0.00723537	0.0840064
ENSBTAG00000021972	100298754	dynein axonemal heavy chain 5 [Source:VGNC Symbol;Acc:VGNC:28126]	DNAH5	-1.14212	-1.14955	-0.0196415	0.00726438	0.0842681
ENSBTAG00000019627	614712	Thy-1 cell surface antigen [Source:VGNC Symbol;Acc:VGNC:35856]	THY1	2.39483	2.6206	-0.681884	0.00735583	0.0851813
ENSBTAG00000048876	614932	family with sequence similarity 117 member B [Source:NCBI gene (formerly Entrezgene);Acc:614932]	FAM117B	-0.898813	-0.899859	2.31459	0.00735618	0.0851813
ENSBTAG00000000009	524813	forkhead box F1 [Source:VGNC Symbol;Acc:VGNC:29084]	FOXF1	-0.773165	-0.773279	5.49016	0.00740773	0.085702
ENSBTAG00000020772	512972	Rho GTPase activating protein 45 [Source:VGNC Symbol;Acc:VGNC:59319]	ARHGAP45	1.09038	1.09096	4.3415	0.00742767	0.0858565
ENSBTAG00000000687	525136	POC1 centriolar protein B [Source:VGNC Symbol;Acc:VGNC:50158]	POC1B	-0.848108	-0.848234	5.37973	0.00746841	0.0862509
ENSBTAG00000010167	522810	testis expressed 14, intercellular bridge forming factor [Source:VGNC Symbol;Acc:VGNC:35762]	TEX14	-1.29998	-1.31735	-0.681069	0.00750431	0.0865502
ENSBTAG00000015362	540595	bone morphogenetic protein 7 [Source:VGNC Symbol;Acc:VGNC:26522]	BMP7	0.816595	0.816715	6.06566	0.00750762	0.0865502
ENSBTAG00000019574	512943	mitogen-activated protein kinase 12 [Source:VGNC Symbol;Acc:VGNC:31215]	MAPK12	1.11596	1.11674	4.25706	0.00752436	0.0866665
ENSBTAG00000003130	282702	cholinergic receptor nicotinic alpha 3 subunit [Source:VGNC Symbol;Acc:VGNC:27325]	CHRNA3	0.883821	0.885189	2.50759	0.00753176	0.0866751
ENSBTAG00000039319	507615	cytochrome P450, family 4, subfamily F, polypeptide 2 [Source:NCBI gene (formerly Entrezgene);Acc:507615]	CYP4F2	1.53671	1.54197	1.95263	0.00754237	0.0867206
ENSBTAG00000013260	506451	spindlin family, member 2 [Source:NCBI gene (formerly Entrezgene);Acc:506451]	SPIN2	-0.890948	-0.892062	2.38569	0.00755673	0.086809
ENSBTAG00000007122	767896	ZFP2 zinc finger protein [Source:NCBI gene (formerly Entrezgene);Acc:767896]	ZFP2	-1.19503	-1.19925	0.988972	0.00763766	0.0876615
ENSBTAG00000015576	528272	neuronal PAS domain protein 1 [Source:VGNC Symbol;Acc:VGNC:32189]	NPAS1	1.66939	1.69859	0.177105	0.0076615	0.0878578
ENSBTAG00000017393	524334	L3MBTL histone methyl-lysine binding protein 3 [Source:VGNC Symbol;Acc:VGNC:50640]	L3MBTL3	-0.778484	-0.77854	6.43309	0.00767593	0.0879457
ENSBTAG00000044197	518089	EDAR associated death domain [Source:VGNC Symbol;Acc:VGNC:28319]	EDARADD	1.46224	1.47206	0.801208	0.00769334	0.0880678
ENSBTAG00000001174	510347	mitochondrial ribosomal protein L15 [Source:VGNC Symbol;Acc:VGNC:31619]	MRPL15	0.798771	0.799022	5.26075	0.00773519	0.0884691
ENSBTAG00000002849	614253	interferon regulatory factor 6 [Source:VGNC Symbol;Acc:VGNC:30277]	IRF6	1.21994	1.23036	0.470231	0.00775035	0.0885648
ENSBTAG00000016932	507820	SUMO specific peptidase 7 [Source:VGNC Symbol;Acc:VGNC:52825]	SENP7	-0.831204	-0.831358	5.04739	0.00778928	0.0889316
ENSBTAG00000003616	539794	DNA cross-link repair 1B [Source:VGNC Symbol;Acc:VGNC:27917]	DCLRE1B	0.896946	0.897074	6.25935	0.00783515	0.0893769
ENSBTAG00000011059	505691	cyclin dependent kinase inhibitor 2C [Source:VGNC Symbol;Acc:VGNC:27146]	CDKN2C	-0.824346	-0.824476	5.26037	0.00785154	0.0894272
ENSBTAG00000010562	281051	CD34 molecule [Source:VGNC Symbol;Acc:VGNC:27025]	CD34	1.35034	1.3677	0.0118248	0.00785328	0.0894272
ENSBTAG00000016854	511269	adenylate kinase 7 [Source:VGNC Symbol;Acc:VGNC:25776]	AK7	-0.935515	-0.936839	2.05868	0.0078667	0.0894825
ENSBTAG00000047000	#N/A	0	0	0.944084	0.947449	1.51719	0.00787188	0.0894825
ENSBTAG00000046248	326600	actin related protein 2/3 complex subunit 1B [Source:VGNC Symbol;Acc:VGNC:26164]	ARPC1B	1.0394	1.03972	5.28213	0.00791537	0.0898985
ENSBTAG00000003387	523736	phosphatidylinositol-4-phosphate 5-kinase like 1 [Source:VGNC Symbol;Acc:VGNC:32913]	PIP5KL1	1.29149	1.30568	-0.108333	0.00799033	0.0906707
ENSBTAG00000009649	509524	dynein regulatory complex subunit 1 [Source:VGNC Symbol;Acc:VGNC:28205]	DRC1	-0.965626	-0.967002	1.94999	0.00802109	0.0909406
ENSBTAG00000011765	338472	GABA type A receptor associated protein like 1 [Source:VGNC Symbol;Acc:VGNC:56201]	GABARAPL1	-0.717935	-0.717958	7.62118	0.00803042	0.0909672
ENSBTAG00000024663	505686	ladinin 1 [Source:VGNC Symbol;Acc:VGNC:30766]	LAD1	1.74771	1.79403	-0.840824	0.00810578	0.0916303
ENSBTAG00000052750	#N/A	0	0	-1.06848	-1.07214	0.831186	0.00810735	0.0916303
ENSBTAG00000000819	538070	regulatory factor X3 [Source:VGNC Symbol;Acc:VGNC:33895]	RFX3	-1.07785	-1.08439	-0.125032	0.00811006	0.0916303
ENSBTAG00000010606	514428	protein phosphatase 1 regulatory subunit 3B [Source:VGNC Symbol;Acc:VGNC:33243]	PPP1R3B	0.85738	0.857847	4.31293	0.00812949	0.0917703
ENSBTAG00000001246	282144	ATPase Na+/K+ transporting subunit alpha 1 [Source:VGNC Symbol;Acc:VGNC:26282]	ATP1A1	-0.781461	-0.781467	9.72394	0.00818543	0.0921935
ENSBTAG00000005272	526521	deoxyhypusine hydroxylase [Source:VGNC Symbol;Acc:VGNC:28164]	DOHH	1.07022	1.07292	2.21712	0.00818581	0.0921935
ENSBTAG00000006320	280759	dihydrolipoamide branched chain transacylase E2 [Source:VGNC Symbol;Acc:VGNC:27896]	DBT	-0.827999	-0.828154	5.17027	0.00819328	0.0921935
ENSBTAG00000003300	281913	milk fat globule EGF and factor V/VIII domain containing [Source:VGNC Symbol;Acc:VGNC:31426]	MFGE8	0.90161	0.901654	8.03372	0.00819644	0.0921935
ENSBTAG00000016542	529939	laminin subunit beta 3 [Source:VGNC Symbol;Acc:VGNC:30773]	LAMB3	0.988373	0.988481	6.46081	0.00820237	0.0921935
ENSBTAG00000010549	541283	interferon related developmental regulator 1 [Source:VGNC Symbol;Acc:VGNC:30062]	IFRD1	0.807967	0.808045	7.08742	0.00821181	0.0922201
ENSBTAG00000008636	100124505	phosphodiesterase 4B [Source:VGNC Symbol;Acc:VGNC:32676]	PDE4B	0.889016	0.88914	6.15498	0.00823984	0.0924551
ENSBTAG00000053153	#N/A	0	0	1.06881	1.071	2.56662	0.00827865	0.0928106
ENSBTAG00000003033	504939	growth arrest and DNA damage inducible gamma [Source:VGNC Symbol;Acc:VGNC:29208]	GADD45G	1.13285	1.13554	1.94528	0.00828618	0.0928152
ENSBTAG00000008144	614498	peptidylprolyl isomerase like 6 [Source:VGNC Symbol;Acc:VGNC:33205]	PPIL6	-1.25296	-1.26585	-0.537432	0.00830209	0.0929135
ENSBTAG00000049561	#N/A	0	0	1.27233	1.28995	-0.0580151	0.00832768	0.09312
ENSBTAG00000002385	523783	solute carrier family 35 member E4 [Source:VGNC Symbol;Acc:VGNC:34832]	SLC35E4	1.001	1.00414	2.26037	0.00838282	0.0936561
ENSBTAG00000031573	780788	nicotinamide riboside kinase 2 [Source:NCBI gene (formerly Entrezgene);Acc:780788]	NMRK2	4.06005	1.44269e+08	-0.747184	0.00841685	0.0939557
ENSBTAG00000008492	522721	zinc finger MYM-type containing 3 [Source:VGNC Symbol;Acc:VGNC:37199]	ZMYM3	-0.754544	-0.754592	6.57717	0.00846975	0.0944653
ENSBTAG00000030259	524957	Ras protein specific guanine nucleotide releasing factor 2 [Source:VGNC Symbol;Acc:VGNC:33746]	RASGRF2	-0.9897	-0.992663	1.41446	0.0085594	0.0953835
ENSBTAG00000011278	515146	xylulokinase [Source:VGNC Symbol;Acc:VGNC:37011]	XYLB	1.17249	1.17749	1.36534	0.00862278	0.095974
ENSBTAG00000020286	507330	GRB2 associated regulator of MAPK1 subtype 1 [Source:VGNC Symbol;Acc:VGNC:29252]	GAREM1	-1.45423	-1.46972	-0.722142	0.00862712	0.095974
ENSBTAG00000033304	617047	transcriptional and immune response regulator [Source:VGNC Symbol;Acc:VGNC:49157]	TCIM	0.85675	0.856861	6.74606	0.00872387	0.0969675
ENSBTAG00000006589	281067	CF transmembrane conductance regulator [Source:VGNC Symbol;Acc:VGNC:50053]	CFTR	-1.42609	-1.43267	0.247062	0.00873797	0.0970414
ENSBTAG00000004494	520159	beta-1,4-N-acetyl-galactosaminyltransferase 1 [Source:VGNC Symbol;Acc:VGNC:26385]	B4GALNT1	0.996158	0.99743	2.89775	0.0087463	0.0970511
ENSBTAG00000032089	507966	CDC42 effector protein 2 [Source:VGNC Symbol;Acc:VGNC:27073]	CDC42EP2	1.04142	1.04235	3.73178	0.0087855	0.0974032
ENSBTAG00000023970	783508	UL16-binding protein 27-like [Source:NCBI gene (formerly Entrezgene);Acc:783508]	0	1.16878	1.18067	0.494262	0.00890731	0.0986697
ENSBTAG00000000296	504305	inosine monophosphate dehydrogenase 1 [Source:VGNC Symbol;Acc:VGNC:30188]	IMPDH1	0.828867	0.829171	4.87805	0.00892559	0.0987882
ENSBTAG00000034995	539436	ITPRIP like 1 [Source:VGNC Symbol;Acc:VGNC:30350]	ITPRIPL1	0.905178	0.905776	4.02844	0.00894686	0.0989396
ENSBTAG00000009830	511885	pleckstrin homology domain containing B1 [Source:VGNC Symbol;Acc:VGNC:33009]	PLEKHB1	-0.838936	-0.83923	4.0196	0.00895825	0.0989814
ENSBTAG00000007494	540904	SWI/SNF related, matrix associated, actin dependent regulator of chromatin, subfamily a, member 2 [Source:VGNC Symbol;Acc:VGNC:34986]	SMARCA2	-0.759892	-0.759903	8.63158	0.00909183	0.100372
ENSBTAG00000004987	785834	nucleoporin 210 like [Source:VGNC Symbol;Acc:VGNC:32357]	NUP210L	-1.1734	-1.1819	-0.178477	0.0091424	0.100845
ENSBTAG00000006262	515401	LIM zinc finger domain containing 2 [Source:VGNC Symbol;Acc:VGNC:30891]	LIMS2	1.21263	1.21345	3.76676	0.00917294	0.101096
ENSBTAG00000033222	508555	calreticulin 3 [Source:VGNC Symbol;Acc:VGNC:26716]	CALR3	-0.956176	-0.959357	0.980143	0.00919674	0.101273
ENSBTAG00000021425	617152	lectin, mannose binding 1 like [Source:VGNC Symbol;Acc:VGNC:30919]	LMAN1L	1.19722	1.20428	1.06644	0.00925341	0.101761
ENSBTAG00000013915	508271	DSN1 component of MIS12 kinetochore complex [Source:VGNC Symbol;Acc:VGNC:28224]	DSN1	0.748787	0.748833	7.40174	0.00925666	0.101761
ENSBTAG00000010384	515301	cell division cycle 6 [Source:VGNC Symbol;Acc:VGNC:27081]	CDC6	0.745801	0.745919	5.8568	0.00928315	0.101903
ENSBTAG00000012675	508229	myosin XIX [Source:VGNC Symbol;Acc:VGNC:31815]	MYO19	0.89639	0.896546	5.85878	0.00928524	0.101903
ENSBTAG00000005700	538340	mitogen-activated protein kinase kinase kinase 9 [Source:VGNC Symbol;Acc:VGNC:31203]	MAP3K9	0.963095	0.965041	2.6591	0.00929708	0.101947
ENSBTAG00000002136	505672	FCH and mu domain containing endocytic adaptor 1 [Source:VGNC Symbol;Acc:VGNC:28935]	FCHO1	1.16499	1.16525	5.3566	0.00935864	0.102536
ENSBTAG00000002869	767906	ADP ribosylation factor like GTPase 4A [Source:VGNC Symbol;Acc:VGNC:26144]	ARL4A	-0.916305	-0.917373	2.75428	0.00942341	0.103159
ENSBTAG00000008836	#N/A	zinc finger protein 782 [Source:VGNC Symbol;Acc:VGNC:55091]	ZNF782	-1.00486	-1.00821	0.931386	0.00943226	0.103169
ENSBTAG00000052436	#N/A	0	0	-1.32074	-1.33404	-0.406026	0.00945707	0.103353
ENSBTAG00000021134	521100	dipeptidyl peptidase 9 [Source:VGNC Symbol;Acc:VGNC:28190]	DPP9	0.963077	0.96356	4.59932	0.00947843	0.1035
ENSBTAG00000020665	514036	GDNF family receptor alpha 2 [Source:VGNC Symbol;Acc:VGNC:29333]	GFRA2	-0.880662	-0.881445	2.60914	0.00952873	0.103962
ENSBTAG00000014048	615129	shieldin complex subunit 1 [Source:VGNC Symbol;Acc:VGNC:49170]	SHLD1	-0.941691	-0.943642	1.51881	0.00973806	0.10609
ENSBTAG00000004802	100336437	centrosomal protein 170B [Source:VGNC Symbol;Acc:VGNC:50066]	CEP170B	0.972464	0.972796	5.01725	0.0097456	0.10609
ENSBTAG00000017632	614749	apoptosis enhancing nuclease [Source:VGNC Symbol;Acc:VGNC:25705]	AEN	1.61134	1.61536	2.72598	0.00975512	0.10609
ENSBTAG00000005340	534377	secretion regulating guanine nucleotide exchange factor [Source:VGNC Symbol;Acc:VGNC:50043]	SERGEF	-0.815128	-0.815571	3.40271	0.00975635	0.10609
ENSBTAG00000017133	616799	GINS complex subunit 4 [Source:VGNC Symbol;Acc:VGNC:29363]	GINS4	0.732706	0.732996	4.55551	0.00977172	0.106169
ENSBTAG00000040056	513386	leukotriene B4 receptor 2 [Source:VGNC Symbol;Acc:VGNC:31070]	LTB4R2	1.96795	2.01215	0.338377	0.00980265	0.106416
ENSBTAG00000000575	540664	Bos taurus tenascin C (TNC), mRNA. [Source:RefSeq mRNA;Acc:NM_001372074]	TNC	1.01319	1.0155	2.05077	0.00981302	0.10644
ENSBTAG00000010116	#N/A	adenylate kinase 9 [Source:VGNC Symbol;Acc:VGNC:25778]	AK9	-0.960873	-0.963668	1.25844	0.00986284	0.106891
ENSBTAG00000045994	407139	adrenoceptor alpha 2C [Source:NCBI gene (formerly Entrezgene);Acc:407139]	ADRA2C	4.22	1.44269e+08	-1.10125	0.00988613	0.107055
ENSBTAG00000021741	517953	ribosomal protein S6 kinase A2 [Source:VGNC Symbol;Acc:VGNC:34141]	RPS6KA2	-1.0414	-1.04275	1.99131	0.0099072	0.107194
ENSBTAG00000020983	616503	RAS related [Source:VGNC Symbol;Acc:VGNC:49146]	RRAS	1.02257	1.02306	4.41475	0.0101285	0.109497
ENSBTAG00000013670	511556	solute carrier family 46 member 2 [Source:VGNC Symbol;Acc:VGNC:34885]	SLC46A2	2.48652	2.71527	-0.749555	0.0101711	0.109866
ENSBTAG00000032372	767819	histone H3 associated protein kinase [Source:VGNC Symbol;Acc:VGNC:55834]	HASPIN	0.739413	0.739674	4.9802	0.0102236	0.110342
ENSBTAG00000008650	526873	calcium/calmodulin dependent protein kinase ID [Source:VGNC Symbol;Acc:VGNC:58595]	CAMK1D	-0.822326	-0.822813	3.25333	0.0102519	0.110555
ENSBTAG00000016140	104974256	PPFIA binding protein 2 [Source:VGNC Symbol;Acc:VGNC:58399]	PPFIBP2	-0.834937	-0.835287	3.82911	0.0102722	0.110563
ENSBTAG00000002170	533792	NOVA alternative splicing regulator 1 [Source:VGNC Symbol;Acc:VGNC:84869]	NOVA1	-0.825011	-0.825535	3.35008	0.0102725	0.110563
ENSBTAG00000037413	524183	transmembrane protein 164 [Source:VGNC Symbol;Acc:VGNC:35989]	TMEM164	-0.74536	-0.745529	4.68433	0.010278	0.110563
ENSBTAG00000020936	444867	nucleotide binding oligomerization domain containing 2 [Source:VGNC Symbol;Acc:VGNC:32151]	NOD2	-0.983909	-0.984766	2.60876	0.0103316	0.110967
ENSBTAG00000003651	525643	otopetrin 1 [Source:VGNC Symbol;Acc:VGNC:32488]	OTOP1	-1.13349	-1.13882	0.528112	0.0103326	0.110967
ENSBTAG00000045862	525159	fermitin family member 3 [Source:NCBI gene (formerly Entrezgene);Acc:525159]	FERMT3	-1.01639	-1.02141	0.165436	0.010377	0.111314
ENSBTAG00000039962	614103	dCTP pyrophosphatase 1 [Source:VGNC Symbol;Acc:VGNC:27934]	DCTPP1	0.912323	0.9128	4.60777	0.0103826	0.111314
ENSBTAG00000011786	531049	clustered mitochondria homolog [Source:VGNC Symbol;Acc:VGNC:50138]	CLUH	0.972215	0.972499	5.42973	0.0103986	0.111314
ENSBTAG00000050772	#N/A	0	0	-0.928578	-0.929112	3.45914	0.0103991	0.111314
ENSBTAG00000010793	515235	coiled-coil domain containing 80 [Source:VGNC Symbol;Acc:VGNC:26918]	CCDC80	-0.79459	-0.79461	7.8067	0.0104256	0.111506
ENSBTAG00000001801	539867	synaptotagmin 4 [Source:VGNC Symbol;Acc:VGNC:35543]	SYT4	-0.839678	-0.83977	5.99729	0.0105137	0.112356
ENSBTAG00000010987	282713	NFKB inhibitor zeta [Source:VGNC Symbol;Acc:VGNC:32050]	NFKBIZ	-0.880159	-0.880288	5.93623	0.0105687	0.112851
ENSBTAG00000034522	613859	solute carrier family 10 member 7 [Source:NCBI gene (formerly Entrezgene);Acc:613859]	SLC10A7	-0.815123	-0.815704	3.11668	0.0106888	0.11404
ENSBTAG00000016643	527518	cytochrome b561 family member D1 [Source:VGNC Symbol;Acc:VGNC:50259]	CYB561D1	-0.855447	-0.856187	2.93327	0.010752	0.114621
ENSBTAG00000053086	112441889	pleckstrin homology like domain family A member 3 [Source:NCBI gene (formerly Entrezgene);Acc:112441889]	PHLDA3	2.02603	2.04754	0.497101	0.0107743	0.114765
ENSBTAG00000013802	538818	DAB adaptor protein 1 [Source:VGNC Symbol;Acc:VGNC:27864]	DAB1	-1.20606	-1.21794	-0.768198	0.0107834	0.114767
ENSBTAG00000002037	534448	ataxin 7 like 1 [Source:VGNC Symbol;Acc:VGNC:26343]	ATXN7L1	-0.926522	-0.928344	1.59799	0.0107947	0.114794
ENSBTAG00000005586	414732	glycine amidinotransferase [Source:VGNC Symbol;Acc:VGNC:29274]	GATM	-0.791189	-0.791244	6.42101	0.0108483	0.115269
ENSBTAG00000003219	#N/A	F-box and leucine rich repeat protein 7 [Source:VGNC Symbol;Acc:VGNC:52778]	FBXL7	-0.82258	-0.823183	2.90411	0.0109503	0.116224
ENSBTAG00000020355	520842	Kruppel like factor 4 [Source:VGNC Symbol;Acc:VGNC:52790]	KLF4	0.897364	0.898344	3.79957	0.0109559	0.116224
ENSBTAG00000008097	493729	Wnt family member 2 [Source:VGNC Symbol;Acc:VGNC:36957]	WNT2	1.31756	1.3314	0.737732	0.0109683	0.116261
ENSBTAG00000052078	#N/A	0	0	1.33112	1.33936	0.902247	0.0109943	0.116442
ENSBTAG00000039275	513572	endoplasmic reticulum aminopeptidase 2 [Source:VGNC Symbol;Acc:VGNC:28561]	ERAP2	-0.80753	-0.807748	4.42742	0.0110183	0.116601
ENSBTAG00000049604	#N/A	0	0	-0.991708	-0.993147	2.15891	0.0111014	0.117385
ENSBTAG00000017850	533823	Rac/Cdc42 guanine nucleotide exchange factor 6 [Source:VGNC Symbol;Acc:VGNC:26120]	ARHGEF6	1.34764	1.35976	0.659388	0.0111152	0.117435
ENSBTAG00000006419	282095	troponin T1, slow skeletal type [Source:VGNC Symbol;Acc:VGNC:36194]	TNNT1	1.37219	1.3984	-0.42154	0.0111486	0.117693
ENSBTAG00000012128	520865	aminoadipate-semialdehyde synthase [Source:VGNC Symbol;Acc:VGNC:25451]	AASS	-0.791246	-0.791437	4.72878	0.0111864	0.117997
ENSBTAG00000051239	#N/A	0	0	-0.843932	-0.844052	5.45006	0.0112052	0.118099
ENSBTAG00000001543	538558	BRI3 binding protein [Source:VGNC Symbol;Acc:VGNC:26565]	BRI3BP	0.97512	0.977123	2.3609	0.0112785	0.118775
ENSBTAG00000007827	541233	REST corepressor 2 [Source:VGNC Symbol;Acc:VGNC:33835]	RCOR2	0.917524	0.919297	2.66346	0.0112896	0.118797
ENSBTAG00000013414	504596	biliverdin reductase A [Source:VGNC Symbol;Acc:VGNC:26510]	BLVRA	-0.721409	-0.721466	6.29705	0.0113042	0.118854
ENSBTAG00000017116	527921	RASD family member 2 [Source:VGNC Symbol;Acc:VGNC:33741]	RASD2	1.74808	1.80013	0.179635	0.0113432	0.119168
ENSBTAG00000008827	523846	SPARC (osteonectin), cwcv and kazal like domains proteoglycan 2 [Source:VGNC Symbol;Acc:VGNC:35226]	SPOCK2	-1.04313	-1.0435	3.7817	0.0113766	0.119422
ENSBTAG00000040361	516209	LFNG O-fucosylpeptide 3-beta-N-acetylglucosaminyltransferase [Source:VGNC Symbol;Acc:VGNC:30849]	LFNG	0.774225	0.774351	5.68481	0.0113933	0.119501
ENSBTAG00000009156	616227	calcium/calmodulin dependent protein kinase II inhibitor 1 [Source:VGNC Symbol;Acc:VGNC:26723]	CAMK2N1	-0.799414	-0.799549	5.22639	0.0114245	0.119732
ENSBTAG00000015313	511941	CEA cell adhesion molecule 19 [Source:NCBI gene (formerly Entrezgene);Acc:511941]	CEACAM19	1.72901	1.76377	-0.0413774	0.0114416	0.119815
ENSBTAG00000000505	508712	kynurenine aminotransferase 3 [Source:VGNC Symbol;Acc:VGNC:30758]	KYAT3	-0.796247	-0.79633	5.98822	0.0115027	0.120358
ENSBTAG00000009800	527436	musashi RNA binding protein 1 [Source:VGNC Symbol;Acc:VGNC:31697]	MSI1	1.10027	1.10696	1.42729	0.0115148	0.120388
ENSBTAG00000046379	100299927	solute carrier family 34 member 3 [Source:VGNC Symbol;Acc:VGNC:58411]	SLC34A3	1.18528	1.18819	2.29277	0.01157	0.120868
ENSBTAG00000019517	280781	elastin [Source:NCBI gene (formerly Entrezgene);Acc:280781]	ELN	1.17816	1.18341	1.26598	0.0116022	0.121108
ENSBTAG00000038042	782719	C-X-C motif chemokine receptor 2 [Source:NCBI gene (formerly Entrezgene);Acc:782719]	CXCR2	1.5502	1.6059	-0.144639	0.0116539	0.121549
ENSBTAG00000015758	510934	U6 snRNA biogenesis phosphodiesterase 1 [Source:VGNC Symbol;Acc:VGNC:36703]	USB1	0.879149	0.879838	3.82493	0.0116941	0.121742
ENSBTAG00000031214	618409	interferon regulatory factor 4 [Source:NCBI gene (formerly Entrezgene);Acc:618409]	0	-1.06414	-1.06847	0.381997	0.0116982	0.121742
ENSBTAG00000002996	519045	shroom family member 4 [Source:VGNC Symbol;Acc:VGNC:34610]	SHROOM4	-0.806565	-0.806912	3.69423	0.0117159	0.121742
ENSBTAG00000014979	112447369	major facilitator superfamily domain containing 12 [Source:VGNC Symbol;Acc:VGNC:58388]	MFSD12	0.993453	0.994595	3.36901	0.0117161	0.121742
ENSBTAG00000000804	540817	MOB kinase activator 3B [Source:VGNC Symbol;Acc:VGNC:31545]	MOB3B	-1.5076	-1.51816	-0.0636134	0.0117191	0.121742
ENSBTAG00000012348	511219	leucine rich repeat containing 71 [Source:VGNC Symbol;Acc:VGNC:31025]	LRRC71	0.998572	1.00082	2.57129	0.0118474	0.122977
ENSBTAG00000003692	281562	uncoupling protein 2 [Source:VGNC Symbol;Acc:VGNC:36641]	UCP2	0.757121	0.757227	6.06495	0.0118657	0.123069
ENSBTAG00000009198	784390	ankyrin repeat and SOCS box containing 9 [Source:VGNC Symbol;Acc:VGNC:26202]	ASB9	-1.44186	-1.459	-0.799559	0.0119206	0.123514
ENSBTAG00000017741	618814	3-hydroxyacyl-CoA dehydratase 4 [Source:VGNC Symbol;Acc:VGNC:58600]	HACD4	-0.85406	-0.854329	4.17177	0.0119275	0.123514
ENSBTAG00000051673	780821	cysteine rich protein 2 [Source:NCBI gene (formerly Entrezgene);Acc:780821]	CRIP2	1.11218	1.11264	4.74309	0.0120033	0.1242
ENSBTAG00000001969	534432	coiled-coil domain containing 39 [Source:VGNC Symbol;Acc:VGNC:50106]	CCDC39	-0.936604	-0.937481	2.7687	0.0121228	0.125337
ENSBTAG00000009475	515731	plexin domain containing 2 [Source:VGNC Symbol;Acc:VGNC:33058]	PLXDC2	-0.799729	-0.799772	6.70811	0.0122003	0.126038
ENSBTAG00000005111	615037	bone morphogenetic protein 2 [Source:VGNC Symbol;Acc:VGNC:26517]	BMP2	0.789016	0.789102	6.38405	0.0122157	0.126097
ENSBTAG00000001110	531531	solute carrier family 16 member 5 [Source:VGNC Symbol;Acc:VGNC:34691]	SLC16A5	1.02512	1.02671	2.88954	0.0122945	0.126809
ENSBTAG00000007842	525659	glutamate-cysteine ligase modifier subunit [Source:VGNC Symbol;Acc:VGNC:29290]	GCLM	-0.777439	-0.777602	4.81876	0.0123313	0.127089
ENSBTAG00000005072	523202	cubilin [Source:VGNC Symbol;Acc:VGNC:27828]	CUBN	0.954895	0.958452	1.5821	0.0123545	0.127227
ENSBTAG00000020890	520781	tripartite motif containing 66 [Source:VGNC Symbol;Acc:VGNC:36348]	TRIM66	-1.17471	-1.18448	-0.306564	0.0123664	0.127249
ENSBTAG00000014020	539797	rhotekin 2 [Source:VGNC Symbol;Acc:VGNC:34198]	RTKN2	0.875659	0.875979	4.9017	0.0124596	0.128107
ENSBTAG00000020108	513324	leucine zipper and EF-hand containing transmembrane protein 1 [Source:VGNC Symbol;Acc:VGNC:30846]	LETM1	0.805974	0.806201	5.25602	0.012471	0.128123
ENSBTAG00000034147	513053	olfactomedin like 2B [Source:VGNC Symbol;Acc:VGNC:32423]	OLFML2B	-0.776709	-0.776784	5.82217	0.0124932	0.128249
ENSBTAG00000019470	515816	NIMA related kinase 6 [Source:VGNC Symbol;Acc:VGNC:31997]	NEK6	-0.750112	-0.750199	5.65153	0.0125302	0.128529
ENSBTAG00000010153	518050	annexin A3 [Source:VGNC Symbol;Acc:VGNC:25965]	ANXA3	0.776757	0.776783	8.22468	0.0125403	0.128531
ENSBTAG00000008353	513497	cyclin dependent kinase inhibitor 1A [Source:VGNC Symbol;Acc:VGNC:27142]	CDKN1A	0.909114	0.909136	9.02124	0.0126325	0.129374
ENSBTAG00000003837	511675	R-spondin 1 [Source:VGNC Symbol;Acc:VGNC:34188]	RSPO1	-0.943081	-0.944007	2.50707	0.0126952	0.129903
ENSBTAG00000005215	513478	interleukin 10 receptor subunit alpha [Source:VGNC Symbol;Acc:VGNC:30107]	IL10RA	1.3701	1.393	0.320787	0.0127041	0.129903
ENSBTAG00000031572	513583	intraflagellar transport 80 [Source:VGNC Symbol;Acc:VGNC:59338]	IFT80	-0.807821	-0.807932	5.48578	0.0127371	0.130004
ENSBTAG00000011889	514530	nucleolar complex associated 4 homolog [Source:VGNC Symbol;Acc:VGNC:32148]	NOC4L	0.94904	0.949831	3.98781	0.0127395	0.130004
ENSBTAG00000054102	#N/A	0	0	-1.0919	-1.09678	0.286227	0.0127528	0.130004
ENSBTAG00000039766	785549	fibrosin like 1 [Source:VGNC Symbol;Acc:VGNC:28889]	FBRSL1	1.07364	1.0743	4.17058	0.0127539	0.130004
ENSBTAG00000020626	508357	ERCC excision repair 6 like 2 [Source:VGNC Symbol;Acc:VGNC:56964]	ERCC6L2	-0.771154	-0.771272	5.27984	0.0127846	0.130215
ENSBTAG00000020681	508840	fibronectin type III domain containing 3A [Source:VGNC Symbol;Acc:VGNC:29062]	FNDC3A	-0.799509	-0.79954	7.45958	0.0128403	0.13068
ENSBTAG00000005064	532903	tryptophanyl tRNA synthetase 2, mitochondrial [Source:VGNC Symbol;Acc:VGNC:36864]	WARS2	-0.762435	-0.762702	4.19131	0.0128623	0.130801
ENSBTAG00000017240	518371	diacylglycerol kinase theta [Source:VGNC Symbol;Acc:VGNC:28031]	DGKQ	1.37323	1.3754	3.17345	0.0128732	0.130811
ENSBTAG00000024275	613590	X-ray repair cross complementing 4 [Source:VGNC Symbol;Acc:VGNC:37005]	XRCC4	-0.869048	-0.869658	3.02946	0.013025	0.132231
ENSBTAG00000009097	522442	FA complementation group I [Source:VGNC Symbol;Acc:VGNC:28859]	FANCI	0.791809	0.791848	7.64398	0.0130333	0.132231
ENSBTAG00000008711	504851	BCL2 family apoptosis regulator BOK [Source:VGNC Symbol;Acc:VGNC:26538]	BOK	1.62777	1.64279	0.66636	0.013046	0.132231
ENSBTAG00000040496	535990	potassium voltage-gated channel subfamily B member 2 [Source:VGNC Symbol;Acc:VGNC:30431]	KCNB2	-1.0132	-1.01595	1.05331	0.0130536	0.132231
ENSBTAG00000004464	615299	homologous recombination factor with OB-fold [Source:VGNC Symbol;Acc:VGNC:52654]	HROB	0.81805	0.818605	4.03473	0.0131054	0.132415
ENSBTAG00000020413	514762	amyloid beta precursor protein binding family A member 2 [Source:VGNC Symbol;Acc:VGNC:26001]	APBA2	2.01276	2.04479	-0.534304	0.0131117	0.132415
ENSBTAG00000000706	512171	ADAM metallopeptidase with thrombospondin type 1 motif 1 [Source:VGNC Symbol;Acc:VGNC:25614]	ADAMTS1	-0.822008	-0.822228	4.70299	0.0131143	0.132415
ENSBTAG00000017318	538491	transmembrane protein 178A [Source:VGNC Symbol;Acc:VGNC:36003]	TMEM178A	0.888084	0.889828	2.64872	0.01312	0.132415
ENSBTAG00000009998	526331	polypeptide N-acetylgalactosaminyltransferase 16 [Source:VGNC Symbol;Acc:VGNC:29229]	GALNT16	0.811477	0.811791	4.5815	0.0131257	0.132415
ENSBTAG00000004727	507075	progestin and adipoQ receptor family member 4 [Source:VGNC Symbol;Acc:VGNC:32576]	PAQR4	0.925063	0.925545	4.33364	0.0131328	0.132415
ENSBTAG00000048664	784403	cyclin dependent kinase 14 [Source:NCBI gene (formerly Entrezgene);Acc:784403]	CDK14	-0.745516	-0.745546	7.112	0.0132312	0.133304
ENSBTAG00000010464	786290	MN1 proto-oncogene, transcriptional regulator [Source:VGNC Symbol;Acc:VGNC:31536]	MN1	-0.917905	-0.918668	2.72919	0.0132928	0.133821
ENSBTAG00000047827	516214	renin binding protein [Source:VGNC Symbol;Acc:VGNC:33866]	RENBP	1.21477	1.22039	1.71088	0.0133258	0.133994
ENSBTAG00000012212	540868	cytochrome P450, family 26, subfamily B, polypeptide 1 [Source:NCBI gene (formerly Entrezgene);Acc:540868]	CYP26B1	1.30579	1.32133	0.779286	0.0133407	0.133994
ENSBTAG00000005871	532209	MDS1 and EVI1 complex locus [Source:VGNC Symbol;Acc:VGNC:31343]	MECOM	-1.11044	-1.11371	1.20429	0.0133408	0.133994
ENSBTAG00000015996	518114	glypican 1 [Source:VGNC Symbol;Acc:VGNC:29523]	GPC1	1.15142	1.15182	4.69701	0.0133675	0.134159
ENSBTAG00000051048	#N/A	0	0	-1.16069	-1.17333	-0.358039	0.013462	0.135004
ENSBTAG00000006551	538949	establishment of sister chromatid cohesion N-acetyltransferase 2 [Source:VGNC Symbol;Acc:VGNC:59196]	ESCO2	0.816223	0.816328	6.35997	0.013626	0.136452
ENSBTAG00000021838	538640	epithelial splicing regulatory protein 1 [Source:VGNC Symbol;Acc:VGNC:28606]	ESRP1	-1.06248	-1.0639	2.16583	0.0136274	0.136452
ENSBTAG00000000406	768314	G-patch domain containing 4 [Source:VGNC Symbol;Acc:VGNC:29519]	GPATCH4	0.769704	0.77	5.12932	0.0136428	0.136501
ENSBTAG00000007116	541123	arrestin domain containing 3 [Source:VGNC Symbol;Acc:VGNC:26173]	ARRDC3	-0.813371	-0.813499	5.61545	0.0137013	0.136982
ENSBTAG00000020944	789183	piezo type mechanosensitive ion channel component 1 [Source:VGNC Symbol;Acc:VGNC:32864]	PIEZO1	0.978664	0.978829	5.87954	0.0137339	0.137093
ENSBTAG00000010475	788867	motilin receptor [Source:VGNC Symbol;Acc:VGNC:53824]	MLNR	1.42513	1.4563	-0.271368	0.0137409	0.137093
ENSBTAG00000012467	522347	mannan binding lectin serine peptidase 1 [Source:VGNC Symbol;Acc:VGNC:31255]	MASP1	3.88051	1.44269e+08	-1.15051	0.013745	0.137093
ENSBTAG00000053140	#N/A	0	0	1.01475	1.01891	1.00314	0.0137545	0.137093
ENSBTAG00000013953	281660	caldesmon 1 [Source:VGNC Symbol;Acc:VGNC:26706]	CALD1	0.735649	0.735656	9.91296	0.0138314	0.137753
ENSBTAG00000001504	516995	NOP14 nucleolar protein [Source:VGNC Symbol;Acc:VGNC:32165]	NOP14	0.763346	0.763474	6.07759	0.0138636	0.137968
ENSBTAG00000010096	399680	solute carrier family 5 member 2 [Source:VGNC Symbol;Acc:VGNC:34906]	SLC5A2	1.34748	1.38044	-0.764969	0.0138856	0.138083
ENSBTAG00000016192	527943	malate dehydrogenase 1B [Source:VGNC Symbol;Acc:VGNC:31334]	MDH1B	-0.851684	-0.852725	2.31505	0.0139037	0.138157
ENSBTAG00000006060	616832	doublecortin domain containing 1 [Source:NCBI gene (formerly Entrezgene);Acc:616832]	DCDC1	-1.11517	-1.12338	-0.125033	0.0139254	0.138267
ENSBTAG00000053766	107132327	cytochrome P450 2J2-like [Source:NCBI gene (formerly Entrezgene);Acc:107132327]	0	-1.01807	-1.02284	0.56608	0.0139591	0.138425
ENSBTAG00000011007	533184	tweety family member 2 [Source:VGNC Symbol;Acc:VGNC:36501]	TTYH2	0.761925	0.762141	5.12631	0.0139626	0.138425
ENSBTAG00000013705	506727	NFKB inhibitor epsilon [Source:VGNC Symbol;Acc:VGNC:32048]	NFKBIE	0.866793	0.867647	3.60288	0.0139771	0.138463
ENSBTAG00000051412	512439	hemoglobin, alpha 2 [Source:NCBI gene (formerly Entrezgene);Acc:512439]	HBA	1.50389	1.52542	0.208087	0.0140137	0.138721
ENSBTAG00000016124	520488	protein kinase C and casein kinase substrate in neurons 1 [Source:VGNC Symbol;Acc:VGNC:32542]	PACSIN1	1.46215	1.47582	0.600161	0.0140315	0.138783
ENSBTAG00000024984	100848732	fibrinogen silencer binding protein [Source:VGNC Symbol;Acc:VGNC:55754]	FSBP	-0.912269	-0.913105	2.72258	0.0140421	0.138783
ENSBTAG00000044062	784766	RNA binding motif single stranded interacting protein 3 [Source:VGNC Symbol;Acc:VGNC:33811]	RBMS3	-0.898264	-0.899467	1.99742	0.0140519	0.138783
ENSBTAG00000002579	538548	fibrillarin [Source:VGNC Symbol;Acc:VGNC:28879]	FBL	0.719756	0.719811	7.05615	0.0140934	0.139087
ENSBTAG00000007977	513094	lysosomal associated membrane protein family member 5 [Source:VGNC Symbol;Acc:VGNC:30778]	LAMP5	-1.20927	-1.22528	-0.830426	0.0141398	0.139246
ENSBTAG00000009768	509678	interferon induced protein with tetratricopeptide repeats 3 [Source:VGNC Symbol;Acc:VGNC:30050]	IFIT3	-0.909311	-0.911057	1.76009	0.0141398	0.139246
ENSBTAG00000012295	618586	NKD inhibitor of WNT signaling pathway 1 [Source:VGNC Symbol;Acc:VGNC:32093]	NKD1	-0.866845	-0.86795	1.91711	0.0141416	0.139246
ENSBTAG00000002251	#N/A	0	0	-1.06291	-1.06974	0.0629328	0.014212	0.139833
ENSBTAG00000010590	505415	family with sequence similarity 118 member A [Source:VGNC Symbol;Acc:VGNC:28720]	FAM118A	0.738897	0.739015	6.00851	0.014263	0.140229
ENSBTAG00000014958	282463	protein kinase cAMP-dependent type II regulatory subunit beta [Source:VGNC Symbol;Acc:VGNC:33326]	PRKAR2B	-0.779455	-0.779662	4.52082	0.0142904	0.140327
ENSBTAG00000046257	510751	GTPase, IMAP family member 4 [Source:NCBI gene (formerly Entrezgene);Acc:510751]	GIMAP4	0.815198	0.815291	6.27835	0.0142944	0.140327
ENSBTAG00000011952	280934	sulfotransferase family 1E member 1 [Source:VGNC Symbol;Acc:VGNC:35467]	SULT1E1	1.67897	1.7162	-0.686928	0.0143078	0.140353
ENSBTAG00000051195	100335729	0	0	-1.152	-1.16751	-0.599083	0.014328	0.14041
ENSBTAG00000000074	615371	nuclear factor I A [Source:VGNC Symbol;Acc:VGNC:32038]	NFIA	-0.744658	-0.744806	4.81944	0.0143352	0.14041
ENSBTAG00000014124	521962	MLLT3 super elongation complex subunit [Source:VGNC Symbol;Acc:VGNC:31503]	MLLT3	-0.834955	-0.835512	2.98126	0.0143979	0.140917
ENSBTAG00000018806	541250	proline and serine rich coiled-coil 1 [Source:VGNC Symbol;Acc:VGNC:33484]	PSRC1	0.801304	0.801381	6.8657	0.0144154	0.140983
ENSBTAG00000001823	540573	stanniocalcin 2 [Source:VGNC Symbol;Acc:VGNC:35378]	STC2	-0.785861	-0.786421	3.02598	0.0144813	0.141499
ENSBTAG00000054325	#N/A	0	0	-0.813524	-0.813808	4.19354	0.0144986	0.141499
ENSBTAG00000012371	532189	carboxypeptidase D [Source:VGNC Symbol;Acc:VGNC:27647]	CPD	-0.799652	-0.79966	9.23702	0.0145007	0.141499
ENSBTAG00000007975	513537	aldehyde dehydrogenase 8 family member A1 [Source:VGNC Symbol;Acc:VGNC:25819]	ALDH8A1	1.17518	1.18715	0.753798	0.0145352	0.141729
ENSBTAG00000040427	526945	Rho GTPase activating protein 19 [Source:NCBI gene (formerly Entrezgene);Acc:526945]	0	-0.737803	-0.737875	5.91607	0.0145728	0.141989
ENSBTAG00000015848	100336808	phosphorylase kinase regulatory subunit alpha 1 [Source:VGNC Symbol;Acc:VGNC:32830]	PHKA1	-0.768856	-0.769062	4.44004	0.0146932	0.143055
ENSBTAG00000007490	533264	sulfatase 2 [Source:VGNC Symbol;Acc:VGNC:35466]	SULF2	0.99222	0.992274	7.27633	0.0147121	0.143132
ENSBTAG00000021374	522024	phenylalanyl-tRNA synthetase subunit alpha [Source:VGNC Symbol;Acc:VGNC:28867]	FARSA	0.862999	0.86329	5.11348	0.0147454	0.14335
ENSBTAG00000001564	508547	phosphodiesterase 4D interacting protein [Source:VGNC Symbol;Acc:VGNC:55072]	PDE4DIP	-0.714805	-0.714843	6.93506	0.0148535	0.144293
ENSBTAG00000017056	539579	pyruvate kinase L/R [Source:VGNC Symbol;Acc:VGNC:32943]	PKLR	0.929153	0.931904	1.79405	0.0149276	0.144904
ENSBTAG00000002056	514726	methionyl-tRNA synthetase 2, mitochondrial [Source:VGNC Symbol;Acc:VGNC:31251]	MARS2	0.805818	0.806657	3.55264	0.0149744	0.145251
ENSBTAG00000018297	515305	pleckstrin homology, MyTH4 and FERM domain containing H1 [Source:VGNC Symbol;Acc:VGNC:33020]	PLEKHH1	1.19309	1.20303	0.415385	0.015021	0.145594
ENSBTAG00000020843	281967	proprotein convertase subtilisin/kexin type 1 [Source:VGNC Symbol;Acc:VGNC:32646]	PCSK1	-0.861077	-0.861644	2.97464	0.015095	0.146203
ENSBTAG00000050958	#N/A	0	0	-1.05472	-1.0625	-0.150592	0.0151291	0.146384
ENSBTAG00000050995	#N/A	0	0	-1.19848	-1.20646	-0.188562	0.0151362	0.146384
ENSBTAG00000020203	618096	transmembrane protein 151A [Source:VGNC Symbol;Acc:VGNC:56289]	TMEM151A	1.14086	1.14201	3.48991	0.0152392	0.14727
ENSBTAG00000009573	505437	chromosome 15 C11orf49 homolog [Source:VGNC Symbol;Acc:VGNC:54857]	C15H11orf49	-0.875237	-0.875772	3.16279	0.015263	0.147389
ENSBTAG00000002480	525496	nudix hydrolase 1 [Source:VGNC Symbol;Acc:VGNC:32325]	NUDT1	1.0679	1.06935	3.07386	0.015274	0.147389
ENSBTAG00000021872	533125	RAS guanyl releasing protein 1 [Source:VGNC Symbol;Acc:VGNC:33747]	RASGRP1	1.03773	1.03962	2.55948	0.0153154	0.147445
ENSBTAG00000045746	#N/A	0	0	1.27849	1.2869	0.797085	0.0153174	0.147445
ENSBTAG00000001824	510658	solute carrier family 2 member 6 [Source:VGNC Symbol;Acc:VGNC:34802]	SLC2A6	1.15393	1.15757	2.07686	0.0153177	0.147445
ENSBTAG00000050809	618265	GIPC PDZ domain containing family member 3 [Source:NCBI gene (formerly Entrezgene);Acc:618265]	GIPC3	1.2585	1.26823	1.02561	0.0153251	0.147445
ENSBTAG00000014382	519027	KN motif and ankyrin repeat domains 4 [Source:VGNC Symbol;Acc:VGNC:55243]	KANK4	-0.781414	-0.781503	5.55092	0.0154421	0.148461
ENSBTAG00000040329	407136	5-hydroxytryptamine receptor 1D [Source:VGNC Symbol;Acc:VGNC:29993]	HTR1D	1.4663	1.48643	-0.225232	0.015496	0.148869
ENSBTAG00000010741	505794	kelch like family member 41 [Source:VGNC Symbol;Acc:VGNC:30666]	KLHL41	-1.0495	-1.05896	-0.00510324	0.0155724	0.149493
ENSBTAG00000022019	101905136	uncharacterized LOC101905136 [Source:NCBI gene (formerly Entrezgene);Acc:101905136]	0	1.26103	1.2698	0.858049	0.015622	0.149858
ENSBTAG00000011187	282605	family with sequence similarity 13 member A [Source:VGNC Symbol;Acc:VGNC:28731]	FAM13A	-0.741097	-0.741201	5.43516	0.0156632	0.150143
ENSBTAG00000003749	520448	potassium calcium-activated channel subfamily M regulatory beta subunit 4 [Source:VGNC Symbol;Acc:VGNC:30482]	KCNMB4	-0.933902	-0.938844	0.142906	0.0157081	0.150463
ENSBTAG00000000428	514090	BCL2 antagonist/killer 1 [Source:VGNC Symbol;Acc:VGNC:26416]	BAK1	0.752147	0.752282	5.85863	0.0157538	0.15079
ENSBTAG00000031185	100125942	all-trans retinoic acid induced differentiation factor [Source:VGNC Symbol;Acc:VGNC:54408]	ATRAID	-0.709923	-0.710074	4.86442	0.0158064	0.151182
ENSBTAG00000016275	505315	amidohydrolase domain containing 1 [Source:VGNC Symbol;Acc:VGNC:25860]	AMDHD1	-0.961358	-0.96501	0.999696	0.0158198	0.151199
ENSBTAG00000048982	#N/A	0	0	-1.01522	-1.0167	2.30751	0.0159438	0.152273
ENSBTAG00000008814	616111	adhesion G protein-coupled receptor A2 [Source:NCBI gene (formerly Entrezgene);Acc:616111]	ADGRA2	0.979843	0.98034	4.26158	0.0160465	0.153142
ENSBTAG00000027854	504356	Rho GDP dissociation inhibitor gamma [Source:VGNC Symbol;Acc:VGNC:26103]	ARHGDIG	1.05818	1.06498	0.956094	0.0160777	0.153327
ENSBTAG00000003044	541068	spindlin 1 [Source:VGNC Symbol;Acc:VGNC:35217]	SPIN1	-0.729659	-0.7297	6.81494	0.0161034	0.153459
ENSBTAG00000012244	539882	tubulin, alpha 1b [Source:NCBI gene (formerly Entrezgene);Acc:539882]	TUBA1B	0.698618	0.698623	10.3507	0.0161436	0.15373
ENSBTAG00000018991	536433	testis specific 10 [Source:VGNC Symbol;Acc:VGNC:36415]	TSGA10	-0.925597	-0.930112	0.354142	0.0161675	0.153773
ENSBTAG00000038306	506628	chromobox 2 [Source:VGNC Symbol;Acc:VGNC:26817]	CBX2	0.749547	0.74975	5.05832	0.0161718	0.153773
ENSBTAG00000031454	504538	serine protease 42 [Source:VGNC Symbol;Acc:VGNC:33422]	PRSS42	-1.03462	-1.04245	-0.114462	0.0162979	0.154806
ENSBTAG00000006080	539825	microtubule associated serine/threonine kinase 1 [Source:VGNC Symbol;Acc:VGNC:31257]	MAST1	1.03209	1.03636	1.59729	0.0163041	0.154806
ENSBTAG00000019347	536989	plexin domain containing 1 [Source:VGNC Symbol;Acc:VGNC:33057]	PLXDC1	1.2281	1.23821	0.745655	0.0163192	0.154837
ENSBTAG00000006671	514567	DEAD-box helicase 27 [Source:VGNC Symbol;Acc:VGNC:56183]	DDX27	0.711226	0.711315	6.47311	0.0164608	0.156066
ENSBTAG00000013095	516724	forkhead box N1 [Source:VGNC Symbol;Acc:VGNC:29095]	FOXN1	0.992822	0.99693	1.8739	0.0165266	0.156576
ENSBTAG00000024426	539311	protein phosphatase 1 regulatory subunit 9A [Source:VGNC Symbol;Acc:VGNC:33250]	PPP1R9A	-0.872518	-0.87303	3.28285	0.0165598	0.156734
ENSBTAG00000048678	#N/A	0	0	1.27637	1.29173	0.105543	0.0165674	0.156734
ENSBTAG00000015007	525346	nuclear receptor coactivator 1 [Source:VGNC Symbol;Acc:VGNC:97291]	NCOA1	-0.707609	-0.707669	6.26532	0.0167208	0.158071
ENSBTAG00000000052	617454	PBX/knotted 1 homeobox 2 [Source:VGNC Symbol;Acc:VGNC:32949]	PKNOX2	-0.831694	-0.83217	3.19836	0.0168647	0.159316
ENSBTAG00000003180	507444	transmembrane protein 201 [Source:VGNC Symbol;Acc:VGNC:36023]	TMEM201	1.19457	1.20062	1.27631	0.0169969	0.160448
ENSBTAG00000018160	506387	laminin subunit alpha 1 [Source:VGNC Symbol;Acc:VGNC:30769]	LAMA1	0.912186	0.913139	3.2512	0.0170507	0.16084
ENSBTAG00000022004	613533	filamin B [Source:VGNC Symbol;Acc:VGNC:29034]	FLNB	0.796155	0.796163	9.93498	0.0170709	0.160842
ENSBTAG00000018314	511672	mediator complex subunit 11 [Source:VGNC Symbol;Acc:VGNC:31348]	MED11	-0.799759	-0.8004	3.03544	0.0170757	0.160842
ENSBTAG00000012074	317776	MYB proto-oncogene, transcription factor [Source:VGNC Symbol;Acc:VGNC:31776]	MYB	-0.794175	-0.794493	3.8871	0.0172369	0.162243
ENSBTAG00000054750	#N/A	0	0	-0.986147	-0.988932	0.985117	0.0172789	0.162522
ENSBTAG00000012307	541153	dystrobrevin alpha [Source:VGNC Symbol;Acc:VGNC:28231]	DTNA	-1.0292	-1.02988	2.97357	0.0174261	0.163788
ENSBTAG00000031890	537203	dedicator of cytokinesis 1 [Source:VGNC Symbol;Acc:VGNC:28154]	DOCK1	-0.738502	-0.738551	6.37881	0.0176357	0.165638
ENSBTAG00000038330	516108	CG2446-like [Source:NCBI gene (formerly Entrezgene);Acc:516108]	0	1.21704	1.21988	2.47787	0.0176726	0.165866
ENSBTAG00000007681	508809	dihydrofolate reductase [Source:NCBI gene (formerly Entrezgene);Acc:508809]	DHFR	-0.785245	-0.785289	6.71832	0.0177167	0.16616
ENSBTAG00000022520	353120	BRCA1 DNA repair associated [Source:VGNC Symbol;Acc:VGNC:55781]	BRCA1	0.772835	0.772868	7.74971	0.0177967	0.166739
ENSBTAG00000046671	100298456	wolframin ER transmembrane glycoprotein [Source:VGNC Symbol;Acc:VGNC:36936]	WFS1	0.859995	0.860392	4.70463	0.0178047	0.166739
ENSBTAG00000046580	508378	DExH-box helicase 58 [Source:VGNC Symbol;Acc:VGNC:28058]	DHX58	-0.875929	-0.876877	2.48886	0.0178272	0.166739
ENSBTAG00000051542	530929	cytochrome P450, family 2, subfamily J [Source:NCBI gene (formerly Entrezgene);Acc:530929]	0	-1.00611	-1.01031	0.675858	0.0178297	0.166739
ENSBTAG00000039823	#N/A	kelch repeat and BTB domain containing 7 [Source:VGNC Symbol;Acc:VGNC:53820]	KBTBD7	-0.91073	-0.912795	1.58839	0.0180643	0.168812
ENSBTAG00000012855	280843	lipoprotein lipase [Source:VGNC Symbol;Acc:VGNC:30969]	LPL	-0.799356	-0.799702	3.77519	0.018145	0.169445
ENSBTAG00000030322	#N/A	kelch domain containing 7A [Source:VGNC Symbol;Acc:VGNC:30637]	KLHDC7A	1.37068	1.37453	2.14983	0.0182089	0.169919
ENSBTAG00000043960	536269	methylenetetrahydrofolate dehydrogenase (NADP+ dependent) 2 like [Source:NCBI gene (formerly Entrezgene);Acc:536269]	MTHFD2L	-0.906246	-0.9081	1.7011	0.0182254	0.169952
ENSBTAG00000010576	516039	mitogen-activated protein kinase kinase 3 [Source:VGNC Symbol;Acc:VGNC:31184]	MAP2K3	0.752969	0.753027	7.14293	0.0182557	0.170113
ENSBTAG00000052892	#N/A	0	0	0.997888	1.00579	0.735289	0.0182755	0.170148
ENSBTAG00000052736	#N/A	0	0	-0.98336	-0.986271	1.0832	0.0182857	0.170148
ENSBTAG00000014389	523019	Sp4 transcription factor [Source:VGNC Symbol;Acc:VGNC:35155]	SP4	-0.816827	-0.817381	3.26415	0.0183068	0.170199
ENSBTAG00000034435	789390	NKD inhibitor of WNT signaling pathway 2 [Source:VGNC Symbol;Acc:VGNC:59353]	NKD2	1.73948	1.76043	0.350185	0.0183172	0.170199
ENSBTAG00000009418	617268	family with sequence similarity 131 member B [Source:VGNC Symbol;Acc:VGNC:28728]	FAM131B	0.91412	0.916046	2.45788	0.0183724	0.170589
ENSBTAG00000052472	#N/A	0	0	-0.8048	-0.805514	3.00042	0.0184183	0.170894
ENSBTAG00000017824	614909	interferon regulatory factor 8 [Source:VGNC Symbol;Acc:VGNC:30279]	IRF8	1.27177	1.30092	-0.035535	0.0184624	0.170991
ENSBTAG00000033214	615452	TBC1 domain family member 19 [Source:VGNC Symbol;Acc:VGNC:35632]	TBC1D19	-0.769067	-0.76938	3.95432	0.0184779	0.170991
ENSBTAG00000005311	767843	RNA polymerase III subunit H [Source:VGNC Symbol;Acc:VGNC:33152]	POLR3H	0.854374	0.85504	3.83693	0.0184803	0.170991
ENSBTAG00000003788	534142	regulator of chromosome condensation 1 [Source:VGNC Symbol;Acc:VGNC:33825]	RCC1	0.72374	0.723846	6.00394	0.0184813	0.170991
ENSBTAG00000014096	539495	pecanex 4 [Source:VGNC Symbol;Acc:VGNC:32641]	PCNX4	-0.815583	-0.815937	3.91128	0.0185321	0.17134
ENSBTAG00000047715	100125320	taperin [Source:NCBI gene (formerly Entrezgene);Acc:100125320]	TPRN	0.976303	0.977744	2.81424	0.0185455	0.171342
ENSBTAG00000009357	508292	interleukin 34 [Source:VGNC Symbol;Acc:VGNC:30156]	IL34	1.12036	1.1289	0.291165	0.0187121	0.172759
ENSBTAG00000002368	505350	TUB like protein 2 [Source:VGNC Symbol;Acc:VGNC:36520]	TULP2	-0.885235	-0.886057	2.6955	0.0188656	0.174052
ENSBTAG00000009434	516498	progestin and adipoQ receptor family member 6 [Source:VGNC Symbol;Acc:VGNC:32578]	PAQR6	1.04702	1.04943	2.18959	0.0189551	0.174754
ENSBTAG00000032544	#N/A	sperm associated antigen 1 [Source:VGNC Symbol;Acc:VGNC:35164]	SPAG1	-0.97735	-0.981514	0.568417	0.0189715	0.174782
ENSBTAG00000007166	510260	calcium/calmodulin dependent protein kinase kinase 1 [Source:VGNC Symbol;Acc:VGNC:26725]	CAMKK1	1.02602	1.02699	3.48567	0.0190312	0.175155
ENSBTAG00000050973	#N/A	0	0	0.832206	0.83323	3.25059	0.0190388	0.175155
ENSBTAG00000031509	520318	phosphoribosylformylglycinamidine synthase [Source:VGNC Symbol;Acc:VGNC:32765]	PFAS	0.870438	0.870634	5.67746	0.0191589	0.176135
ENSBTAG00000006177	615659	zinc finger DHHC-type palmitoyltransferase 20 [Source:VGNC Symbol;Acc:VGNC:37136]	ZDHHC20	-0.76983	-0.769844	8.41777	0.019212	0.176499
ENSBTAG00000047265	617154	protein phosphatase 1 regulatory inhibitor subunit 14B [Source:NCBI gene (formerly Entrezgene);Acc:617154]	0	0.773978	0.774144	5.78609	0.0192403	0.176634
ENSBTAG00000012215	515424	copine 7 [Source:VGNC Symbol;Acc:VGNC:27663]	CPNE7	0.944895	0.946541	2.37162	0.0194	0.177975
ENSBTAG00000027728	617720	nudix hydrolase 12 [Source:VGNC Symbol;Acc:VGNC:32326]	NUDT12	-0.757235	-0.757363	5.26829	0.0194214	0.178045
ENSBTAG00000020896	528362	galectin-related inter-fiber protein [Source:VGNC Symbol;Acc:VGNC:29642]	GRIFIN	1.18144	1.19822	-0.281188	0.0194499	0.178181
ENSBTAG00000040473	#N/A	protocadherin gamma subfamily A, 3 [Source:HGNC Symbol;Acc:HGNC:8701]	PCDHGA3	-0.858904	-0.859925	2.29452	0.0194696	0.178222
ENSBTAG00000053703	#N/A	0	0	-0.730577	-0.730685	5.42156	0.0194817	0.178222
ENSBTAG00000021173	516012	coiled-coil domain containing 134 [Source:VGNC Symbol;Acc:VGNC:26847]	CCDC134	0.851242	0.851928	3.71483	0.0195816	0.17901
ENSBTAG00000032140	614815	SH3 domain binding kinase 1 [Source:NCBI gene (formerly Entrezgene);Acc:614815]	SBK1	1.04763	1.05189	1.57638	0.0196885	0.179803
ENSBTAG00000016906	539630	cytochrome P450, family 27, subfamily B, polypeptide 1 [Source:NCBI gene (formerly Entrezgene);Acc:539630]	CYP27B1	1.66546	1.71618	0.837124	0.019696	0.179803
ENSBTAG00000011063	616804	cathepsin O [Source:VGNC Symbol;Acc:VGNC:53898]	CTSO	-0.800748	-0.801388	2.79627	0.0198933	0.181477
ENSBTAG00000016000	509072	calcium responsive transcription factor [Source:VGNC Symbol;Acc:VGNC:26765]	CARF	-0.782715	-0.783091	3.6786	0.019962	0.181977
ENSBTAG00000012481	616055	Ran GTPase activating protein 1 [Source:VGNC Symbol;Acc:VGNC:33713]	RANGAP1	0.930847	0.931171	4.9619	0.0199816	0.182028
ENSBTAG00000012357	512656	vacuolar protein sorting 13 homolog B [Source:NCBI gene (formerly Entrezgene);Acc:512656]	VPS13B	-0.851315	-0.8514	5.87984	0.0200289	0.18212
ENSBTAG00000011700	613446	plasmolipin [Source:VGNC Symbol;Acc:VGNC:33037]	PLLP	-0.935502	-0.936824	2.04235	0.0200315	0.18212
ENSBTAG00000012036	785815	HR lysine demethylase and nuclear receptor corepressor [Source:VGNC Symbol;Acc:VGNC:29950]	HR	0.8766	0.876865	4.96174	0.0200336	0.18212
ENSBTAG00000010856	535881	solute carrier family 8 member A2 [Source:VGNC Symbol;Acc:VGNC:34936]	SLC8A2	-1.26574	-1.2747	-0.19763	0.020138	0.182942
ENSBTAG00000016335	504950	nucleophosmin/nucleoplasmin 3 [Source:VGNC Symbol;Acc:VGNC:32208]	NPM3	0.837163	0.838113	3.4873	0.0202223	0.183579
ENSBTAG00000037533	280678	complement component 4A [Source:NCBI gene (formerly Entrezgene);Acc:280678]	C4A	-1.0389	-1.04109	1.61281	0.0202873	0.18396
ENSBTAG00000045822	100270684	chromosome 15 C11orf96 homolog [Source:NCBI gene (formerly Entrezgene);Acc:100270684]	C15H11orf96	2.60403	3.03647	-0.912639	0.0202925	0.18396
ENSBTAG00000019698	768018	transmembrane and coiled-coil domains 2 [Source:VGNC Symbol;Acc:VGNC:35929]	TMCO2	-1.23114	-1.25209	-0.609168	0.0204348	0.185121
ENSBTAG00000000783	540388	transforming growth factor alpha [Source:VGNC Symbol;Acc:VGNC:58421]	TGFA	1.38334	1.41164	-0.567261	0.0204717	0.18523
ENSBTAG00000004266	508962	DEAD-box helicase 25 [Source:VGNC Symbol;Acc:VGNC:27961]	DDX25	-0.726426	-0.726858	3.30812	0.0204753	0.18523
ENSBTAG00000011279	100139180	matrilin 4 [Source:VGNC Symbol;Acc:VGNC:31266]	MATN4	1.34931	1.36106	0.442815	0.0205783	0.186033
ENSBTAG00000008132	788459	SRY-box transcription factor 13 [Source:VGNC Symbol;Acc:VGNC:35142]	SOX13	1.21651	1.22688	0.475285	0.0207261	0.187239
ENSBTAG00000000095	533834	CD274 molecule [Source:VGNC Symbol;Acc:VGNC:27019]	CD274	2.00765	2.08133	0.929429	0.0207659	0.187468
ENSBTAG00000015834	505852	Rho guanine nucleotide exchange factor 4 [Source:VGNC Symbol;Acc:VGNC:55325]	ARHGEF4	1.14352	1.14675	1.74421	0.0209285	0.188806
ENSBTAG00000012157	534614	coiled-coil domain containing 158 [Source:VGNC Symbol;Acc:VGNC:26862]	CCDC158	-0.778493	-0.779134	2.83532	0.0210015	0.189334
ENSBTAG00000031184	510972	cyclin dependent kinase inhibitor 1C [Source:VGNC Symbol;Acc:VGNC:27144]	CDKN1C	-0.909073	-0.913256	0.634741	0.0210651	0.189394
ENSBTAG00000004092	615606	adenylate kinase 8 [Source:VGNC Symbol;Acc:VGNC:25777]	AK8	-0.896663	-0.898143	1.83392	0.0210753	0.189394
ENSBTAG00000008798	527539	dynein regulatory complex subunit 3 [Source:VGNC Symbol;Acc:VGNC:52763]	DRC3	-0.935234	-0.938431	1.00778	0.0210869	0.189394
ENSBTAG00000016619	510809	MIS18 kinetochore protein A [Source:VGNC Symbol;Acc:VGNC:31485]	MIS18A	0.786997	0.787262	4.9675	0.0210871	0.189394
ENSBTAG00000008285	539092	oxidation resistance 1 [Source:VGNC Symbol;Acc:VGNC:55069]	OXR1	-0.781219	-0.781342	5.28127	0.0210958	0.189394
ENSBTAG00000002190	100295817	dedicator of cytokinesis 8 [Source:VGNC Symbol;Acc:VGNC:28162]	DOCK8	1.23076	1.24799	-0.288256	0.0211016	0.189394
ENSBTAG00000011658	617215	protein tyrosine phosphatase non-receptor type 18 [Source:VGNC Symbol;Acc:VGNC:33533]	PTPN18	0.968067	0.970607	2.04566	0.02111	0.189394
ENSBTAG00000004041	510084	ankyrin repeat domain 10 [Source:VGNC Symbol;Acc:VGNC:25909]	ANKRD10	-0.71438	-0.714491	5.42628	0.0211638	0.189746
ENSBTAG00000052516	616377	cytidine deaminase [Source:NCBI gene (formerly Entrezgene);Acc:616377]	CDA	1.01772	1.02516	1.14954	0.0212216	0.190133
ENSBTAG00000012534	525371	BEN domain containing 3 [Source:VGNC Symbol;Acc:VGNC:26466]	BEND3	0.891477	0.892972	2.46521	0.0212465	0.190226
ENSBTAG00000003061	#N/A	laminin subunit alpha 5 [Source:VGNC Symbol;Acc:VGNC:30771]	LAMA5	1.05125	1.05129	7.79129	0.021344	0.190808
ENSBTAG00000004641	107133475	pleckstrin homology domain containing A6 [Source:VGNC Symbol;Acc:VGNC:59357]	PLEKHA6	-0.740048	-0.740105	6.30033	0.0213478	0.190808
ENSBTAG00000048991	613762	REC114 meiotic recombination protein [Source:NCBI gene (formerly Entrezgene);Acc:613762]	REC114	-0.828216	-0.829186	2.1626	0.0213555	0.190808
ENSBTAG00000006828	535383	Rap guanine nucleotide exchange factor 3 [Source:VGNC Symbol;Acc:VGNC:33724]	RAPGEF3	0.984848	0.985412	4.08274	0.0214276	0.191321
ENSBTAG00000015950	516212	isochorismatase domain containing 2 [Source:VGNC Symbol;Acc:VGNC:30302]	ISOC2	1.2249	1.22748	2.65729	0.0214572	0.191454
ENSBTAG00000010422	540378	MDM2 proto-oncogene [Source:VGNC Symbol;Acc:VGNC:31336]	MDM2	0.850334	0.85035	9.16992	0.0215933	0.192537
ENSBTAG00000001788	509732	podoplanin [Source:VGNC Symbol;Acc:VGNC:50142]	PDPN	0.759301	0.759322	8.6788	0.0216524	0.192932
ENSBTAG00000043297	112443649	0	0	1.56132	1.59174	-0.501468	0.0216762	0.193011
ENSBTAG00000011149	531801	single Ig and TIR domain containing [Source:VGNC Symbol;Acc:VGNC:34616]	SIGIRR	0.978278	0.980297	2.30591	0.0217614	0.193637
ENSBTAG00000013001	784914	zinc finger protein 26 [Source:NCBI gene (formerly Entrezgene);Acc:784914]	ZNF84	-1.04092	-1.04397	1.03225	0.0218095	0.193934
ENSBTAG00000036367	100313262	0	0	-1.0326	-1.03611	1.00254	0.0218309	0.193963
ENSBTAG00000021928	539229	divergent protein kinase domain 1B [Source:VGNC Symbol;Acc:VGNC:28825]	DIPK1B	1.17457	1.19683	-0.666682	0.0218426	0.193963
ENSBTAG00000019907	100849076	WNK lysine deficient protein kinase 4 [Source:VGNC Symbol;Acc:VGNC:36952]	WNK4	-0.896883	-0.899564	1.46463	0.0219558	0.194835
ENSBTAG00000004975	532832	coiled-coil domain containing 191 [Source:VGNC Symbol;Acc:VGNC:26884]	CCDC191	-0.766449	-0.767116	2.79674	0.0219859	0.19497
ENSBTAG00000023731	281298	melanocortin 1 receptor [Source:NCBI gene (formerly Entrezgene);Acc:281298]	MC1R	1.81487	1.88511	-0.780345	0.0220111	0.19506
ENSBTAG00000054745	#N/A	0	0	0.936723	0.93673	10.2386	0.0220722	0.195404
ENSBTAG00000039782	511194	zinc finger protein 12 [Source:VGNC Symbol;Acc:VGNC:49991]	ZNF12	-0.803052	-0.803507	3.59213	0.0220799	0.195404
ENSBTAG00000014150	616015	chromosome 11 C9orf16 homolog [Source:VGNC Symbol;Acc:VGNC:59208]	C11H9orf16	0.870055	0.870606	4.18919	0.022109	0.195529
ENSBTAG00000048418	104975246	0	0	-1.2675	-1.27626	0.154534	0.0221434	0.195701
ENSBTAG00000004262	767896	ZFP2 zinc finger protein [Source:NCBI gene (formerly Entrezgene);Acc:767896]	ZNF454	-1.29502	-1.30859	-0.687361	0.022319	0.197118
ENSBTAG00000005650	616545	src kinase associated phosphoprotein 2 [Source:VGNC Symbol;Acc:VGNC:34646]	SKAP2	-0.745397	-0.745439	6.74609	0.0225803	0.199291
ENSBTAG00000000910	539786	solute carrier family 6 member 7 [Source:VGNC Symbol;Acc:VGNC:34923]	SLC6A7	1.93444	1.99671	-0.304492	0.0226177	0.199486
ENSBTAG00000014272	280871	methylmalonyl-CoA mutase [Source:VGNC Symbol;Acc:VGNC:31764]	MMUT	-0.71603	-0.716094	6.08949	0.0227134	0.200132
ENSBTAG00000053488	#N/A	0	0	-0.880598	-0.882192	2.07502	0.0227216	0.200132
ENSBTAG00000020238	534114	regulating synaptic membrane exocytosis 1 [Source:VGNC Symbol;Acc:VGNC:53801]	RIMS1	0.988931	0.990583	2.74333	0.0227596	0.200331
ENSBTAG00000006688	530047	ribosomal protein S6 kinase like 1 [Source:VGNC Symbol;Acc:VGNC:34149]	RPS6KL1	0.807562	0.807817	4.74438	0.0229901	0.202223
ENSBTAG00000016161	514446	FLII actin remodeling protein [Source:VGNC Symbol;Acc:VGNC:29032]	FLII	0.82477	0.824818	7.53632	0.0230437	0.202558
ENSBTAG00000037882	#N/A	zinc finger protein 584 [Source:VGNC Symbol;Acc:VGNC:52279]	ZNF584	1.00414	1.01167	0.316717	0.0230796	0.202737
ENSBTAG00000008129	509969	calsyntenin 3 [Source:VGNC Symbol;Acc:VGNC:27468]	CLSTN3	0.87862	0.879146	3.96047	0.0230953	0.202737
ENSBTAG00000014294	534657	suppression of tumorigenicity 7 like [Source:VGNC Symbol;Acc:VGNC:35343]	ST7L	-0.74766	-0.747826	4.79285	0.0232171	0.20367
ENSBTAG00000001754	532836	adenosylhomocysteinase like 2 [Source:VGNC Symbol;Acc:VGNC:25752]	AHCYL2	-0.769692	-0.769887	4.61162	0.0232779	0.204066
ENSBTAG00000005327	524663	sushi domain containing 5 [Source:VGNC Symbol;Acc:VGNC:58418]	SUSD5	1.78408	1.83089	-0.580775	0.0233666	0.204706
ENSBTAG00000049490	#N/A	0	0	-0.842864	-0.843413	3.12794	0.0234508	0.205305
ENSBTAG00000038600	100848949	leucine rich repeat containing 15 [Source:VGNC Symbol;Acc:VGNC:31001]	LRRC15	1.78354	1.88674	-0.793836	0.0235961	0.206438
ENSBTAG00000020520	507449	ras related dexamethasone induced 1 [Source:VGNC Symbol;Acc:VGNC:33740]	RASD1	1.8208	1.89107	-0.644327	0.0236731	0.206973
ENSBTAG00000012508	515049	oxidative stress induced growth inhibitor 1 [Source:VGNC Symbol;Acc:VGNC:32472]	OSGIN1	0.956836	0.958078	2.98689	0.0237128	0.207153
ENSBTAG00000021282	407209	sarcoglycan epsilon [Source:VGNC Symbol;Acc:VGNC:34538]	SGCE	-0.707152	-0.707181	7.25293	0.0237255	0.207153
ENSBTAG00000001702	509812	transmembrane protein 107 [Source:VGNC Symbol;Acc:VGNC:35947]	TMEM107	-0.875936	-0.877154	2.2049	0.0237829	0.20742
ENSBTAG00000030278	613671	EGF like domain multiple 7 [Source:VGNC Symbol;Acc:VGNC:59214]	EGFL7	1.4472	1.4637	0.448664	0.023788	0.20742
ENSBTAG00000023073	616421	family with sequence similarity 89 member A [Source:VGNC Symbol;Acc:VGNC:28842]	FAM89A	0.86257	0.865649	1.75534	0.0238424	0.207756
ENSBTAG00000020880	508562	armadillo like helical domain containing 4 [Source:VGNC Symbol;Acc:VGNC:55104]	ARMH4	-0.918906	-0.921456	0.999698	0.0239898	0.208901
ENSBTAG00000006886	509931	family with sequence similarity 117 member A [Source:VGNC Symbol;Acc:VGNC:28719]	FAM117A	-0.811115	-0.811961	2.52174	0.024017	0.208998
ENSBTAG00000019772	281371	oxytocin receptor [Source:VGNC Symbol;Acc:VGNC:32516]	OXTR	1.85339	1.95865	-0.914603	0.0241261	0.209807
ENSBTAG00000047229	574093	cysteine rich protein 1 [Source:NCBI gene (formerly Entrezgene);Acc:574093]	CRIP1	0.907663	0.90771	7.56835	0.0241681	0.210032
ENSBTAG00000018493	504339	glutamate rich 5 [Source:VGNC Symbol;Acc:VGNC:28585]	ERICH5	0.793314	0.794051	3.6415	0.0243086	0.211112
ENSBTAG00000047613	100336523	HtrA serine peptidase 3 [Source:VGNC Symbol;Acc:VGNC:59337]	HTRA3	0.877469	0.878021	4.09445	0.0243992	0.211758
ENSBTAG00000021975	536993	PATJ crumbs cell polarity complex component [Source:VGNC Symbol;Acc:VGNC:32592]	PATJ	-0.743407	-0.743457	6.40645	0.0244626	0.212167
ENSBTAG00000008539	783487	energy homeostasis associated [Source:VGNC Symbol;Acc:VGNC:28494]	ENHO	1.17018	1.17625	1.07317	0.0245794	0.213038
ENSBTAG00000016094	518759	solute carrier family 36 member 1 [Source:VGNC Symbol;Acc:VGNC:34838]	SLC36A1	0.799276	0.799949	3.44904	0.0246243	0.213285
ENSBTAG00000017679	513432	p21 (RAC1) activated kinase 5 [Source:NCBI gene (formerly Entrezgene);Acc:513432]	PAK5	1.39613	1.43311	0.41921	0.0248943	0.21548
ENSBTAG00000054579	#N/A	0	0	-0.79131	-0.792341	2.2483	0.0249381	0.215716
ENSBTAG00000004777	525716	S100 calcium binding protein B [Source:VGNC Symbol;Acc:VGNC:34248]	S100B	0.845636	0.847468	2.49812	0.0249684	0.215835
ENSBTAG00000013663	616567	cms1 ribosomal small subunit homolog [Source:VGNC Symbol;Acc:VGNC:96694]	CMSS1	-0.835135	-0.835829	2.93024	0.0250257	0.216061
ENSBTAG00000019497	522946	immunoglobulin like domain containing receptor 2 [Source:VGNC Symbol;Acc:VGNC:30174]	ILDR2	-0.79297	-0.793484	3.33654	0.0250277	0.216061
ENSBTAG00000015018	540530	fibronectin type III and SPRY domain containing 2 [Source:VGNC Symbol;Acc:VGNC:29131]	FSD2	-1.06772	-1.07668	-0.377507	0.0250615	0.216209
ENSBTAG00000017461	510085	solute carrier family 16 member 3 [Source:VGNC Symbol;Acc:VGNC:34689]	SLC16A3	1.06175	1.06725	1.12633	0.0250798	0.216224
ENSBTAG00000006548	513504	methylcrotonoyl-CoA carboxylase 1 [Source:VGNC Symbol;Acc:VGNC:31298]	MCCC1	-0.728703	-0.728864	4.80043	0.0252486	0.217536
ENSBTAG00000020173	507329	inositol polyphosphate-5-phosphatase D [Source:VGNC Symbol;Acc:VGNC:30212]	INPP5D	1.37938	1.38061	3.35537	0.0253838	0.218556
ENSBTAG00000001666	509981	nucleolar pre-rRNA processing protein NIP7 [Source:VGNC Symbol;Acc:VGNC:32080]	NIP7	0.771054	0.771415	4.68993	0.0255291	0.219662
ENSBTAG00000014574	518801	cilia and flagella associated protein 43 [Source:VGNC Symbol;Acc:VGNC:27243]	CFAP43	-0.959434	-0.964375	0.220537	0.0255643	0.219819
ENSBTAG00000002707	510372	importin 4 [Source:VGNC Symbol;Acc:VGNC:30242]	IPO4	0.771332	0.771496	5.78703	0.0256636	0.220528
ENSBTAG00000012757	281778	glucosaminyl (N-acetyl) transferase 1 [Source:VGNC Symbol;Acc:VGNC:56968]	GCNT1	-0.747359	-0.747489	5.08669	0.0258266	0.221782
ENSBTAG00000013274	521064	centromere protein V [Source:NCBI gene (formerly Entrezgene);Acc:521064]	0	0.847829	0.84883	3.18577	0.0258597	0.22192
ENSBTAG00000006035	282459	protein phosphatase 1 regulatory inhibitor subunit 1B [Source:VGNC Symbol;Acc:VGNC:33234]	PPP1R1B	1.00788	1.01604	0.592011	0.0259917	0.222906
ENSBTAG00000051191	#N/A	0	0	-0.782426	-0.782457	7.18658	0.0260199	0.223001
ENSBTAG00000038523	537960	ATPase Na+/K+ transporting subunit alpha 4 [Source:VGNC Symbol;Acc:VGNC:26284]	ATP1A4	1.23507	1.26153	-0.783755	0.0261462	0.223936
ENSBTAG00000019743	517007	chromosome transmission fidelity factor 18 [Source:VGNC Symbol;Acc:VGNC:27352]	CHTF18	0.873721	0.873989	4.93623	0.0262486	0.224665
ENSBTAG00000019334	518136	kinesin light chain 2 [Source:VGNC Symbol;Acc:VGNC:30623]	KLC2	0.927479	0.927938	4.47086	0.0263555	0.225432
ENSBTAG00000043567	#N/A	0	0	0.777557	0.777574	9.58117	0.0266671	0.227947
ENSBTAG00000005888	536481	MAM domain containing glycosylphosphatidylinositol anchor 1 [Source:VGNC Symbol;Acc:VGNC:31331]	MDGA1	1.14082	1.14597	1.38719	0.026767	0.228652
ENSBTAG00000009230	541273	fibulin 7 [Source:VGNC Symbol;Acc:VGNC:28884]	FBLN7	1.20631	1.20869	2.2819	0.0268037	0.228815
ENSBTAG00000054639	#N/A	0	0	-0.983214	-0.989362	0.218352	0.0268802	0.229318
ENSBTAG00000014809	327685	annexin A6 [Source:VGNC Symbol;Acc:VGNC:25968]	ANXA6	0.708975	0.709012	7.38781	0.0269014	0.229349
ENSBTAG00000005293	507731	cell division cycle 25C [Source:VGNC Symbol;Acc:VGNC:27064]	CDC25C	0.811773	0.812006	5.31084	0.0269386	0.229515
ENSBTAG00000000170	506093	glutathione S-transferase, theta 4 [Source:NCBI gene (formerly Entrezgene);Acc:506093]	GSTT4	-0.802815	-0.803048	4.23417	0.0270047	0.229928
ENSBTAG00000025622	516457	DEF6 guanine nucleotide exchange factor [Source:VGNC Symbol;Acc:VGNC:27986]	DEF6	0.946274	0.950672	1.3167	0.0270434	0.230107
ENSBTAG00000014665	282401	ADAM metallopeptidase with thrombospondin type 1 motif 2 [Source:VGNC Symbol;Acc:VGNC:25624]	ADAMTS2	-1.05421	-1.05924	0.186059	0.0272107	0.23138
ENSBTAG00000002580	514212	myosin heavy chain 14 [Source:VGNC Symbol;Acc:VGNC:31796]	MYH14	1.50181	1.5369	-0.777197	0.0272611	0.231528
ENSBTAG00000006877	282886	matrix metallopeptidase 16 [Source:VGNC Symbol;Acc:VGNC:31521]	MMP16	-0.879591	-0.880306	2.95941	0.0272636	0.231528
ENSBTAG00000002068	282379	transgelin 2 [Source:VGNC Symbol;Acc:VGNC:35586]	TAGLN2	0.757173	0.757183	9.60056	0.0272891	0.231593
ENSBTAG00000021097	504839	pellino E3 ubiquitin protein ligase family member 3 [Source:VGNC Symbol;Acc:VGNC:32742]	PELI3	1.06711	1.0802	-0.0837618	0.0273901	0.232299
ENSBTAG00000004421	511245	carbohydrate sulfotransferase 14 [Source:VGNC Symbol;Acc:VGNC:27342]	CHST14	0.707411	0.707553	5.71469	0.027451	0.232664
ENSBTAG00000017889	533784	chaperonin containing TCP1 subunit 5 [Source:VGNC Symbol;Acc:VGNC:26998]	CCT5	0.682808	0.682836	8.05275	0.0277327	0.234898
ENSBTAG00000007753	789523	kinesin family member C2 [Source:VGNC Symbol;Acc:VGNC:30612]	KIFC2	0.834331	0.834502	5.56452	0.0278833	0.236021
ENSBTAG00000052904	539904	mex-3 RNA binding family member B [Source:NCBI gene (formerly Entrezgene);Acc:539904]	MEX3B	-0.992681	-0.996571	0.782607	0.0280155	0.236986
ENSBTAG00000015242	529052	solute carrier family 18 member B1 [Source:VGNC Symbol;Acc:VGNC:34708]	SLC18B1	-0.789363	-0.789999	3.19722	0.02815	0.237943
ENSBTAG00000047801	515222	cysteine rich with EGF like domains 2 [Source:VGNC Symbol;Acc:VGNC:27705]	CRELD2	0.876566	0.877318	3.44661	0.0281652	0.237943
ENSBTAG00000013942	523665	diacylglycerol lipase alpha [Source:VGNC Symbol;Acc:VGNC:27872]	DAGLA	1.1242	1.12973	1.02953	0.0285889	0.241366
ENSBTAG00000025233	785529	CACN subunit beta associated regulatory protein [Source:VGNC Symbol;Acc:VGNC:26806]	CBARP	1.21895	1.2345	0.371741	0.028668	0.241654
ENSBTAG00000011266	534401	zinc finger and BTB domain containing 16 [Source:VGNC Symbol;Acc:VGNC:37062]	ZBTB16	-0.963504	-0.96445	2.39608	0.0286681	0.241654
ENSBTAG00000013943	782419	zinc finger protein 703 [Source:VGNC Symbol;Acc:VGNC:37334]	ZNF703	1.51095	1.54074	-0.107285	0.0286787	0.241654
ENSBTAG00000037605	100848815	SLA class II histocompatibility antigen, DQ haplotype D alpha chain-like [Source:NCBI gene (formerly Entrezgene);Acc:100848815]	0	1.67442	1.71527	-0.774854	0.0287119	0.241777
ENSBTAG00000016033	100295338	homeobox D9 [Source:VGNC Symbol;Acc:VGNC:29934]	HOXD9	1.27766	1.30462	-0.278263	0.0287598	0.242025
ENSBTAG00000025448	510569	IZUMO family member 4 [Source:VGNC Symbol;Acc:VGNC:30357]	IZUMO4	-1.24647	-1.26214	-0.56302	0.0289704	0.243639
ENSBTAG00000045306	#N/A	Small nucleolar RNA SNORD63 [Source:RFAM;Acc:RF00154]	SNORD63	-1.08811	-1.09988	-0.40789	0.0290452	0.244015
ENSBTAG00000007933	509304	divergent protein kinase domain 2A [Source:VGNC Symbol;Acc:VGNC:52667]	DIPK2A	-0.738652	-0.738678	7.54345	0.0290525	0.244015
ENSBTAG00000006987	614354	ceramide synthase 3 [Source:VGNC Symbol;Acc:VGNC:27225]	CERS3	-1.25174	-1.26143	-0.359902	0.0291043	0.244293
ENSBTAG00000009611	510395	PHD finger protein 21A [Source:VGNC Symbol;Acc:VGNC:32821]	PHF21A	-0.69894	-0.699137	4.45905	0.0291607	0.244608
ENSBTAG00000020199	526585	coagulation factor II thrombin receptor [Source:VGNC Symbol;Acc:VGNC:28683]	F2R	1.15271	1.16497	0.265317	0.0293104	0.245706
ENSBTAG00000032869	100140137	ribonuclease A family member 10 (inactive) [Source:NCBI gene (formerly Entrezgene);Acc:100140137]	RNASE10	-1.15471	-1.16773	-0.453508	0.0294518	0.246732
ENSBTAG00000009072	768004	zinc finger protein 572 [Source:VGNC Symbol;Acc:VGNC:55758]	ZNF572	-0.74617	-0.746367	4.56146	0.029564	0.247513
ENSBTAG00000015875	513643	forkhead box M1 [Source:VGNC Symbol;Acc:VGNC:29094]	FOXM1	0.795563	0.795758	5.16848	0.0296191	0.247815
ENSBTAG00000005997	281585	multidrug resistance protein 1 [Source:NCBI gene (formerly Entrezgene);Acc:281585]	0	0.776427	0.776576	6.38101	0.0298218	0.249265
ENSBTAG00000002600	505160	EF-hand calcium binding domain 7 [Source:VGNC Symbol;Acc:VGNC:28347]	EFCAB7	-0.750085	-0.750309	4.40507	0.0298306	0.249265
ENSBTAG00000002620	540969	DNA replication helicase/nuclease 2 [Source:VGNC Symbol;Acc:VGNC:28118]	DNA2	0.732788	0.732934	5.69272	0.0299101	0.249769
ENSBTAG00000049321	#N/A	0	0	0.977247	0.985476	0.774093	0.0299406	0.249818
ENSBTAG00000021272	510745	ATP binding cassette subfamily G member 1 [Source:VGNC Symbol;Acc:VGNC:25483]	ABCG1	-0.936453	-0.939741	0.548446	0.0299746	0.249818
ENSBTAG00000014548	614787	niban apoptosis regulator 1 [Source:VGNC Symbol;Acc:VGNC:28726]	NIBAN1	-0.871025	-0.872413	1.77488	0.0299842	0.249818
ENSBTAG00000006141	#N/A	WD repeat domain 93 [Source:VGNC Symbol;Acc:VGNC:53956]	WDR93	-0.909208	-0.914577	0.24842	0.0299928	0.249818
ENSBTAG00000005877	521399	family with sequence similarity 83 member A [Source:VGNC Symbol;Acc:VGNC:28832]	FAM83A	0.766298	0.766847	4.44052	0.0301027	0.250574
ENSBTAG00000011463	615572	MID1 interacting protein 1 [Source:VGNC Symbol;Acc:VGNC:31465]	MID1IP1	-0.722034	-0.722331	4.00735	0.0302127	0.251328
ENSBTAG00000002418	529868	TOPBP1 interacting checkpoint and replication regulator [Source:VGNC Symbol;Acc:VGNC:35860]	TICRR	0.739324	0.739435	5.89824	0.0303069	0.251814
ENSBTAG00000048059	532018	transmembrane protein 86A [Source:VGNC Symbol;Acc:VGNC:36116]	TMEM86A	0.704518	0.704637	5.84554	0.0303096	0.251814
ENSBTAG00000010634	519500	neuron derived neurotrophic factor [Source:VGNC Symbol;Acc:VGNC:31937]	NDNF	0.917442	0.917879	4.61354	0.0303831	0.252263
ENSBTAG00000038480	100138313	fucose-1-phosphate guanylyltransferase [Source:VGNC Symbol;Acc:VGNC:29109]	FPGT	-0.747181	-0.747348	4.94382	0.030495	0.252969
ENSBTAG00000012263	523797	ArfGAP with SH3 domain, ankyrin repeat and PH domain 3 [Source:VGNC Symbol;Acc:VGNC:54406]	ASAP3	-0.810688	-0.811106	3.40348	0.0305094	0.252969
ENSBTAG00000018399	526674	myosin heavy chain 15 [Source:VGNC Symbol;Acc:VGNC:50161]	MYH15	-0.831902	-0.833034	2.11145	0.0305339	0.252969
ENSBTAG00000019164	540513	Rho related BTB domain containing 1 [Source:VGNC Symbol;Acc:VGNC:33945]	RHOBTB1	-0.743546	-0.743903	3.48336	0.0305458	0.252969
ENSBTAG00000002089	#N/A	family with sequence similarity 217 member A [Source:VGNC Symbol;Acc:VGNC:53967]	FAM217A	-0.978853	-0.984589	0.268521	0.0305795	0.253087
ENSBTAG00000009211	617703	ubiquitin conjugating enzyme E2 S [Source:VGNC Symbol;Acc:VGNC:36595]	UBE2S	0.879973	0.880297	4.88604	0.0306825	0.253779
ENSBTAG00000020837	514453	Rho guanine nucleotide exchange factor 16 [Source:VGNC Symbol;Acc:VGNC:26108]	ARHGEF16	1.05845	1.06061	2.43835	0.0309627	0.255934
ENSBTAG00000025062	525318	MAGE family member E2 [Source:VGNC Symbol;Acc:VGNC:31144]	MAGEE2	-0.99871	-1.00251	0.656198	0.0310447	0.256448
ENSBTAG00000043295	112448611	0	0	-1.12379	-1.13512	-0.0531605	0.0310785	0.256534
ENSBTAG00000003610	514134	DENN domain containing 1A [Source:VGNC Symbol;Acc:VGNC:27993]	DENND1A	-0.750986	-0.751123	4.87533	0.0310945	0.256534
ENSBTAG00000008954	510593	proteasome 20S subunit beta 9 [Source:VGNC Symbol;Acc:VGNC:33453]	PSMB9	1.03729	1.04335	1.19804	0.0312265	0.257461
ENSBTAG00000010007	535327	mitogen-activated protein kinase 13 [Source:VGNC Symbol;Acc:VGNC:50213]	MAPK13	1.13191	1.15515	-0.226632	0.0313826	0.258584
ENSBTAG00000009742	524590	docking protein 7 [Source:VGNC Symbol;Acc:VGNC:53703]	DOK7	0.910814	0.915081	1.02668	0.0315128	0.259493
ENSBTAG00000055143	#N/A	0	0	-0.992608	-0.999915	-0.264674	0.0317073	0.260929
ENSBTAG00000000067	517962	stromal cell derived factor 2 like 1 [Source:VGNC Symbol;Acc:VGNC:34386]	SDF2L1	1.051	1.05505	1.41527	0.0318358	0.26174
ENSBTAG00000022890	618684	myelin basic protein [Source:VGNC Symbol;Acc:VGNC:54450]	MBP	-0.979591	-0.982497	1.12962	0.031846	0.26174
ENSBTAG00000020047	520286	MON1 homolog A, secretory trafficking associated [Source:VGNC Symbol;Acc:VGNC:31552]	MON1A	0.985029	0.987208	2.47813	0.031891	0.261803
ENSBTAG00000013638	519277	IQ motif containing H [Source:VGNC Symbol;Acc:VGNC:30257]	IQCH	-1.03412	-1.04096	0.18815	0.0318939	0.261803
ENSBTAG00000019834	#N/A	ADP ribosylation factor like GTPase 15 [Source:HGNC Symbol;Acc:HGNC:25945]	ARL15	-0.899545	-0.901085	1.66764	0.0319473	0.262076
ENSBTAG00000043508	112442787	U8 small nucleolar RNA [Source:RFAM;Acc:RF00096]	U8	-0.96796	-0.97218	0.508066	0.0319867	0.262234
ENSBTAG00000001649	784747	zinc finger protein, FOG family member 2 [Source:VGNC Symbol;Acc:VGNC:54515]	ZFPM2	-0.725777	-0.725914	4.85859	0.0321074	0.263058
ENSBTAG00000000599	504847	cyclin I [Source:VGNC Symbol;Acc:VGNC:26971]	CCNI	-0.718747	-0.718763	7.98736	0.0321323	0.263097
ENSBTAG00000015051	504757	RNA polymerase mitochondrial [Source:VGNC Symbol;Acc:VGNC:33154]	POLRMT	0.883303	0.883704	4.68925	0.0321949	0.263444
ENSBTAG00000003166	516598	AXL receptor tyrosine kinase [Source:VGNC Symbol;Acc:VGNC:26366]	AXL	0.706263	0.706281	9.1059	0.032217	0.26346
ENSBTAG00000007581	529760	adenosine A2b receptor [Source:VGNC Symbol;Acc:VGNC:25688]	ADORA2B	0.761189	0.761741	4.24291	0.0322865	0.263862
ENSBTAG00000010665	529166	cerebellin 3 precursor [Source:VGNC Symbol;Acc:VGNC:26813]	CBLN3	-0.788191	-0.788374	5.1096	0.0323169	0.263945
ENSBTAG00000005240	#N/A	zinc finger protein 605 [Source:VGNC Symbol;Acc:VGNC:37310]	ZNF605	-0.77802	-0.778434	3.48436	0.0323997	0.264455
ENSBTAG00000002015	526227	ribosomal protein S6 kinase A6 [Source:VGNC Symbol;Acc:VGNC:34145]	RPS6KA6	-0.718199	-0.718293	5.46613	0.0324308	0.264543
ENSBTAG00000010477	540604	tetratricopeptide repeat domain 21A [Source:VGNC Symbol;Acc:VGNC:36459]	TTC21A	-0.819691	-0.82057	2.5397	0.0324682	0.264683
ENSBTAG00000018137	#N/A	alpha-2-macroglobulin [Source:VGNC Symbol;Acc:VGNC:55837]	A2M	-1.16429	-1.16684	1.69775	0.0325001	0.264777
ENSBTAG00000010967	510670	ciliary associated calcium binding coiled-coil 1 [Source:VGNC Symbol;Acc:VGNC:54529]	CABCOCO1	-0.866609	-0.868832	1.31657	0.0325564	0.26507
ENSBTAG00000012931	100125240	phospholamban [Source:VGNC Symbol;Acc:VGNC:33038]	PLN	0.895128	0.896435	4.12044	0.0326405	0.265589
ENSBTAG00000045898	#N/A	0	0	1.04956	1.06366	-0.159634	0.0327874	0.266618
ENSBTAG00000008092	613954	RAB37, member RAS oncogene family [Source:VGNC Symbol;Acc:VGNC:33645]	RAB37	0.945975	0.951052	1.07389	0.0328836	0.267233
ENSBTAG00000053679	#N/A	ZFP14 zinc finger protein [Source:HGNC Symbol;Acc:HGNC:29312]	ZFP14	-0.81414	-0.814897	2.68601	0.0329194	0.267357
ENSBTAG00000015462	524182	basonuclin 1 [Source:VGNC Symbol;Acc:VGNC:26530]	BNC1	-0.685107	-0.68513	7.59873	0.0331473	0.269041
ENSBTAG00000033891	101906103	alpha-1,6-mannosyl-glycoprotein 2-beta-N-acetylglucosaminyltransferase [Source:VGNC Symbol;Acc:VGNC:54626]	MGAT2	0.722453	0.722514	7.05389	0.0331913	0.26923
ENSBTAG00000034442	507217	leukemia NUP98 fusion partner 1 [Source:NCBI gene (formerly Entrezgene);Acc:507217]	LNP1	-0.763476	-0.763976	3.17506	0.0333468	0.269934
ENSBTAG00000000737	782535	Dmx like 2 [Source:VGNC Symbol;Acc:VGNC:55110]	DMXL2	-0.708278	-0.708373	5.43619	0.0333603	0.269934
ENSBTAG00000013341	505258	glycogenin 2 [Source:VGNC Symbol;Acc:VGNC:29729]	GYG2	0.74568	0.745929	4.97828	0.0333631	0.269934
ENSBTAG00000021294	505917	von Willebrand factor A domain containing 1 [Source:VGNC Symbol;Acc:VGNC:36850]	VWA1	0.965964	0.966403	4.41474	0.0333654	0.269934
ENSBTAG00000013556	506146	unc-13 homolog D [Source:VGNC Symbol;Acc:VGNC:36666]	UNC13D	0.869559	0.869901	4.44646	0.0333818	0.269934
ENSBTAG00000005133	530846	ankyrin repeat and sterile alpha motif domain containing 6 [Source:VGNC Symbol;Acc:VGNC:25947]	ANKS6	0.805909	0.806654	3.58845	0.0335117	0.270738
ENSBTAG00000001229	504371	solute carrier family 25 member 22 [Source:VGNC Symbol;Acc:VGNC:34750]	SLC25A22	0.990349	0.990751	4.75567	0.0335227	0.270738
ENSBTAG00000051316	#N/A	0	0	1.01384	1.0147	3.68237	0.0337519	0.27242
ENSBTAG00000016177	508090	fibrinogen like 1 [Source:VGNC Symbol;Acc:VGNC:28992]	FGL1	-0.891057	-0.894547	0.701264	0.0339203	0.27361
ENSBTAG00000019920	507073	BICD family like cargo adaptor 2 [Source:VGNC Symbol;Acc:VGNC:26493]	BICDL2	1.1128	1.13423	-0.323574	0.0340282	0.27421
ENSBTAG00000008101	528098	proprotein convertase subtilisin/kexin type 5 [Source:VGNC Symbol;Acc:VGNC:56979]	PCSK5	-0.880901	-0.88112	4.53374	0.0340472	0.27421
ENSBTAG00000049663	537521	protein phosphatase 4 regulatory subunit 4 [Source:NCBI gene (formerly Entrezgene);Acc:537521]	0	-0.856758	-0.858333	1.8227	0.0340662	0.27421
ENSBTAG00000045955	529193	testis specific serine kinase 1B [Source:VGNC Symbol;Acc:VGNC:50014]	TSSK1B	1.56366	1.64136	-0.561095	0.034079	0.27421
ENSBTAG00000016014	515127	nucleoporin 42 [Source:VGNC Symbol;Acc:VGNC:32368]	NUP42	0.728826	0.729136	4.65278	0.0341504	0.274616
ENSBTAG00000019071	538706	COMM domain containing 10 [Source:VGNC Symbol;Acc:VGNC:27582]	COMMD10	-0.753586	-0.753764	4.68707	0.0343214	0.275821
ENSBTAG00000049765	112446462	0	0	0.995103	0.999051	1.38623	0.0343992	0.276275
ENSBTAG00000004476	507711	alcohol dehydrogenase iron containing 1 [Source:VGNC Symbol;Acc:VGNC:25674]	ADHFE1	-0.733707	-0.734007	4.03415	0.0345276	0.277136
ENSBTAG00000010939	515411	chromosome X CXorf58 homolog [Source:VGNC Symbol;Acc:VGNC:52761]	CXHXorf58	-1.02086	-1.02971	-0.232409	0.034605	0.277586
ENSBTAG00000007836	280701	inorganic pyrophosphatase 1 [Source:VGNC Symbol;Acc:VGNC:55992]	PPA1	0.740603	0.740653	7.29786	0.0347326	0.278293
ENSBTAG00000009598	519552	CHM Rab escort protein [Source:VGNC Symbol;Acc:VGNC:27297]	CHM	-0.730809	-0.730932	5.1205	0.0347359	0.278293
ENSBTAG00000011937	533158	RBPJ interacting and tubulin associated 1 [Source:VGNC Symbol;Acc:VGNC:33988]	RITA1	0.776566	0.777459	3.70733	0.0348465	0.279008
ENSBTAG00000049439	#N/A	0	0	-0.815854	-0.818107	1.43195	0.0348848	0.279143
ENSBTAG00000039466	613582	cerebellar degeneration related protein 2 like [Source:VGNC Symbol;Acc:VGNC:27154]	CDR2L	0.807225	0.80765	4.24029	0.0351168	0.280827
ENSBTAG00000001468	540852	sterile alpha motif domain containing 4A [Source:VGNC Symbol;Acc:VGNC:34272]	SAMD4A	0.683408	0.683453	7.03819	0.0351713	0.28109
ENSBTAG00000053606	#N/A	0	0	-1.1444	-1.16178	-0.674909	0.0351969	0.281108
ENSBTAG00000013340	280730	BCL2 associated X, apoptosis regulator [Source:VGNC Symbol;Acc:VGNC:26428]	BAX	0.823654	0.823748	6.46152	0.0352167	0.281108
ENSBTAG00000047450	100295193	SWI5 dependent homologous recombination repair protein 1 [Source:VGNC Symbol;Acc:VGNC:34519]	SFR1	-0.749962	-0.750376	3.57479	0.0352434	0.281148
ENSBTAG00000004458	531482	MORN repeat containing 3 [Source:VGNC Symbol;Acc:VGNC:31560]	MORN3	0.980201	0.989195	0.177943	0.0354679	0.282767
ENSBTAG00000007393	510699	Rho family GTPase 2 [Source:VGNC Symbol;Acc:VGNC:34005]	RND2	-0.873265	-0.874886	1.73311	0.035542	0.282921
ENSBTAG00000010677	535165	LIM and calponin homology domains 1 [Source:VGNC Symbol;Acc:VGNC:30887]	LIMCH1	-0.742459	-0.742537	5.81519	0.0355437	0.282921
ENSBTAG00000017925	510646	lipase maturation factor 2 [Source:VGNC Symbol;Acc:VGNC:30927]	LMF2	0.970995	0.971248	5.2995	0.0355524	0.282921
ENSBTAG00000006253	528415	filamin C [Source:VGNC Symbol;Acc:VGNC:29035]	FLNC	0.879451	0.879525	6.9595	0.0356175	0.283266
ENSBTAG00000053608	#N/A	0	0	-0.786735	-0.787456	2.90463	0.035655	0.283391
ENSBTAG00000017280	280677	complement C3 [Source:VGNC Symbol;Acc:VGNC:26638]	C3	-0.759692	-0.759697	9.80234	0.0357182	0.28372
ENSBTAG00000015437	617042	N-terminal Xaa-Pro-Lys N-methyltransferase 1 [Source:VGNC Symbol;Acc:VGNC:32303]	NTMT1	0.851218	0.851872	3.88238	0.0357612	0.283888
ENSBTAG00000012849	282191	collagen type IV alpha 1 chain [Source:VGNC Symbol;Acc:VGNC:50081]	COL4A1	0.828755	0.82877	8.96662	0.0359587	0.285257
ENSBTAG00000002585	535872	solute carrier family 16 member 2 [Source:VGNC Symbol;Acc:VGNC:54485]	SLC16A2	-1.17319	-1.18517	-0.742083	0.0359774	0.285257
ENSBTAG00000044150	541028	uridine-cytidine kinase 2 [Source:VGNC Symbol;Acc:VGNC:36635]	UCK2	0.709542	0.709776	4.91969	0.0360218	0.285435
ENSBTAG00000021922	514465	small ArfGAP2 [Source:VGNC Symbol;Acc:VGNC:34984]	SMAP2	0.671645	0.671783	5.55313	0.0362225	0.286851
ENSBTAG00000005482	523885	transmembrane protein 135 [Source:VGNC Symbol;Acc:VGNC:56288]	TMEM135	-0.740016	-0.740149	5.0144	0.0362451	0.286856
ENSBTAG00000019951	514598	prenylcysteine oxidase 1 like [Source:VGNC Symbol;Acc:VGNC:32651]	PCYOX1L	0.746973	0.747089	6.03215	0.0363745	0.287705
ENSBTAG00000014662	#N/A	0	0	-1.19919	-1.21882	-0.880795	0.0364652	0.288248
ENSBTAG00000004392	509055	chromosome 29 C11orf24 homolog [Source:VGNC Symbol;Acc:VGNC:52698]	C29H11orf24	0.760471	0.760998	3.75361	0.0365069	0.288281
ENSBTAG00000007158	510619	tetraspanin 31 [Source:VGNC Symbol;Acc:VGNC:36437]	TSPAN31	-0.702851	-0.702904	6.49894	0.0365337	0.288281
ENSBTAG00000011738	617916	transferrin receptor 2 [Source:VGNC Symbol;Acc:VGNC:35796]	TFR2	1.06661	1.0831	-0.407653	0.0365359	0.288281
ENSBTAG00000054317	#N/A	0	0	1.33818	1.36402	-0.653217	0.0366337	0.288835
ENSBTAG00000055116	#N/A	0	0	-1.03358	-1.04649	-0.605686	0.0366647	0.288835
ENSBTAG00000019094	509793	notchless homolog 1 [Source:VGNC Symbol;Acc:VGNC:32109]	NLE1	0.895534	0.897309	2.72934	0.0366725	0.288835
ENSBTAG00000053886	100295228	NADH:ubiquinone oxidoreductase complex assembly factor 8 [Source:NCBI gene (formerly Entrezgene);Acc:100295228]	0	0.792294	0.793412	2.93896	0.0367903	0.289566
ENSBTAG00000053103	613296	trichohyalin [Source:NCBI gene (formerly Entrezgene);Acc:613296]	0	1.16339	1.17996	-0.00443235	0.0368197	0.289566
ENSBTAG00000006526	282152	BCL2 like 1 [Source:VGNC Symbol;Acc:VGNC:26446]	BCL2L1	0.733216	0.733314	6.13857	0.0368321	0.289566
ENSBTAG00000010156	326599	tumor protein, translationally-controlled 1 [Source:NCBI gene (formerly Entrezgene);Acc:326599]	TPT1	-0.707426	-0.70743	9.8879	0.0368665	0.289662
ENSBTAG00000026624	783110	electron transfer flavoprotein regulatory factor 1 [Source:VGNC Symbol;Acc:VGNC:28622]	ETFRF1	-0.789223	-0.789701	3.46864	0.0369618	0.290236
ENSBTAG00000002824	618258	dipeptidase 3 [Source:VGNC Symbol;Acc:VGNC:52194]	DPEP3	0.924854	0.932334	0.207725	0.0370223	0.290498
ENSBTAG00000012991	#N/A	prune homolog 2 with BCH domain [Source:VGNC Symbol;Acc:VGNC:33429]	PRUNE2	-0.855447	-0.856509	2.02629	0.0370502	0.290498
ENSBTAG00000020444	535643	microtubule associated serine/threonine kinase 2 [Source:VGNC Symbol;Acc:VGNC:31258]	MAST2	0.732338	0.732406	6.59192	0.0370621	0.290498
ENSBTAG00000007369	512907	PDZ and LIM domain 2 [Source:VGNC Symbol;Acc:VGNC:32708]	PDLIM2	0.846447	0.846912	4.34761	0.0371329	0.290878
ENSBTAG00000053916	#N/A	makorin ring finger protein 3 [Source:HGNC Symbol;Acc:HGNC:7114]	MKRN3	-0.951379	-0.96215	-0.448118	0.0372143	0.291198
ENSBTAG00000018416	536427	coiled-coil domain containing 42 [Source:VGNC Symbol;Acc:VGNC:26896]	CCDC42	1.3131	1.36376	-0.697769	0.0372184	0.291198
ENSBTAG00000011554	511610	surfeit 6 [Source:VGNC Symbol;Acc:VGNC:35485]	SURF6	0.894346	0.895519	3.06408	0.0374517	0.292847
ENSBTAG00000009596	614006	chromosome 8 C9orf43 homolog [Source:VGNC Symbol;Acc:VGNC:52741]	C8H9orf43	0.855198	0.857736	3.03217	0.0375089	0.293119
ENSBTAG00000010507	614380	solute carrier family 22 member 16 [Source:VGNC Symbol;Acc:VGNC:34724]	SLC22A16	-1.26548	-1.27888	-0.381059	0.0376655	0.294166
ENSBTAG00000002685	513230	pitrilysin metallopeptidase 1 [Source:VGNC Symbol;Acc:VGNC:32923]	PITRM1	0.721683	0.721776	6.3451	0.0376961	0.294228
ENSBTAG00000007881	100139670	interferon-induced protein with tetratricopeptide repeats 1 [Source:NCBI gene (formerly Entrezgene);Acc:100139670]	IFIT1	-0.743856	-0.744122	4.04537	0.0377736	0.294521
ENSBTAG00000000240	613606	A-kinase anchoring protein 7 [Source:VGNC Symbol;Acc:VGNC:25788]	AKAP7	-0.795211	-0.795731	3.09208	0.0377788	0.294521
ENSBTAG00000012314	281276	low density lipoprotein receptor [Source:VGNC Symbol;Acc:VGNC:55214]	LDLR	0.804824	0.804875	7.57093	0.0379651	0.295796
ENSBTAG00000015073	104968457	CDP-L-ribitol pyrophosphorylase A [Source:VGNC Symbol;Acc:VGNC:30303]	CRPPA	-0.763272	-0.763814	2.88435	0.0381764	0.297265
ENSBTAG00000033562	786041	LIM homeobox 1 [Source:VGNC Symbol;Acc:VGNC:30871]	LHX1	1.65114	1.71805	-0.611497	0.0382266	0.297478
ENSBTAG00000039453	100847773	zinc finger protein 324A [Source:NCBI gene (formerly Entrezgene);Acc:100847773]	0	0.947651	0.950336	1.99195	0.0382965	0.297844
ENSBTAG00000054324	787081	TraB domain containing 2B [Source:NCBI gene (formerly Entrezgene);Acc:787081]	TRABD2B	1.03179	1.03847	0.817164	0.038531	0.299489
ENSBTAG00000001152	511478	TLE family member 6, subcortical maternal complex member [Source:VGNC Symbol;Acc:VGNC:52895]	TLE6	0.918398	0.92014	2.54406	0.0386641	0.300344
ENSBTAG00000015144	533029	GEM interacting protein [Source:VGNC Symbol;Acc:VGNC:29436]	GMIP	0.707693	0.707903	5.23174	0.038767	0.300701
ENSBTAG00000008399	100125287	ATR interacting protein [Source:VGNC Symbol;Acc:VGNC:50170]	ATRIP	0.722544	0.722809	4.79358	0.0387857	0.300701
ENSBTAG00000045937	#N/A	0	0	-1.16815	-1.18265	-0.590219	0.0387964	0.300701
ENSBTAG00000019979	784304	cytidine/uridine monophosphate kinase 2 [Source:VGNC Symbol;Acc:VGNC:27481]	CMPK2	1.12872	1.15194	-0.575891	0.0388023	0.300701
ENSBTAG00000016685	539356	flavin containing dimethylaniline monoxygenase 4 [Source:VGNC Symbol;Acc:VGNC:29052]	FMO4	-0.740909	-0.741701	2.47293	0.0388559	0.300937
ENSBTAG00000001359	538799	UDP-GlcNAc:betaGal beta-1,3-N-acetylglucosaminyltransferase 7 [Source:VGNC Symbol;Acc:VGNC:26383]	B3GNT7	1.0392	1.04312	1.41887	0.038934	0.301362
ENSBTAG00000007969	534607	cell death inducing DFFA like effector c [Source:VGNC Symbol;Acc:VGNC:27365]	CIDEC	1.70591	1.77401	-0.643618	0.0389575	0.301365
ENSBTAG00000019303	#N/A	MAF bZIP transcription factor K [Source:VGNC Symbol;Acc:VGNC:31142]	MAFK	1.04347	1.05453	0.398193	0.0389943	0.301471
ENSBTAG00000006716	282022	prostaglandin-endoperoxide synthase 1 [Source:VGNC Symbol;Acc:VGNC:33511]	PTGS1	-0.972498	-0.981515	-0.537457	0.0390719	0.301892
ENSBTAG00000046547	527051	cell death inducing DFFA like effector a [Source:NCBI gene (formerly Entrezgene);Acc:527051]	CIDEA	1.70622	1.77432	-0.637322	0.039241	0.303018
ENSBTAG00000053268	#N/A	0	0	-3.02222	-3.05575	0.827447	0.0392968	0.30327
ENSBTAG00000021654	614840	growth arrest specific 2 [Source:VGNC Symbol;Acc:VGNC:29257]	GAS2	-1.06455	-1.07925	-0.943541	0.0394171	0.304018
ENSBTAG00000038379	101902561	60S ribosomal protein L21-like [Source:NCBI gene (formerly Entrezgene);Acc:101902561]	0	-0.888778	-0.891721	1.07713	0.0395416	0.304798
ENSBTAG00000004735	533526	cyclin E1 [Source:VGNC Symbol;Acc:VGNC:26966]	CCNE1	0.733109	0.733414	4.56644	0.0396746	0.305643
ENSBTAG00000031071	104975043	zinc finger protein 624 [Source:NCBI gene (formerly Entrezgene);Acc:104975043]	ZNF624	-0.750764	-0.75136	3.05239	0.0398411	0.306616
ENSBTAG00000033747	520650	SIL1 nucleotide exchange factor [Source:VGNC Symbol;Acc:VGNC:34622]	SIL1	-0.683146	-0.683264	4.96727	0.0398481	0.306616
ENSBTAG00000019313	616740	zinc finger MIZ-type containing 1 [Source:VGNC Symbol;Acc:VGNC:37195]	ZMIZ1	-0.736105	-0.736165	6.04346	0.0399772	0.307412
ENSBTAG00000053269	#N/A	0	0	-1.15775	-1.17387	-0.598128	0.0400085	0.307412
ENSBTAG00000007954	515135	CDP-diacylglycerol--inositol 3-phosphatidyltransferase [Source:VGNC Symbol;Acc:VGNC:27114]	CDIPT	0.715863	0.71605	5.39959	0.0400243	0.307412
ENSBTAG00000005606	100295214	homeobox C9 [Source:VGNC Symbol;Acc:VGNC:29928]	HOXC9	-0.782598	-0.784848	1.42602	0.040046	0.307412
ENSBTAG00000018650	521015	hepatic and glial cell adhesion molecule [Source:VGNC Symbol;Acc:VGNC:29810]	HEPACAM	-0.944015	-0.944603	3.1187	0.0400906	0.307574
ENSBTAG00000012237	317693	AE binding protein 1 [Source:VGNC Symbol;Acc:VGNC:25703]	AEBP1	0.792025	0.792036	9.14701	0.0403687	0.309525
ENSBTAG00000000476	538672	thrombopoietin [Source:VGNC Symbol;Acc:VGNC:35844]	THPO	0.793295	0.793982	3.54772	0.0403984	0.30957
ENSBTAG00000026283	286771	aspartate beta-hydroxylase [Source:VGNC Symbol;Acc:VGNC:26219]	ASPH	-0.696224	-0.696343	5.04719	0.0404549	0.309654
ENSBTAG00000051647	100196898	0	0	0.755524	0.756157	3.74892	0.0404569	0.309654
ENSBTAG00000003511	538956	SLAIN motif family member 1 [Source:VGNC Symbol;Acc:VGNC:56645]	SLAIN1	-0.762642	-0.763028	3.69425	0.0405422	0.310125
ENSBTAG00000025161	512112	1-acylglycerol-3-phosphate O-acyltransferase 2 [Source:VGNC Symbol;Acc:VGNC:25735]	AGPAT2	0.88496	0.885582	3.85938	0.0406528	0.310789
ENSBTAG00000022622	616753	cytokine inducible SH2 containing protein [Source:VGNC Symbol;Acc:VGNC:27374]	CISH	2.00827	2.09617	-0.499801	0.0406866	0.310812
ENSBTAG00000040277	280691	H4 clustered histone 4 [Source:VGNC Symbol;Acc:VGNC:83562]	H4C4	-0.931733	-0.93847	0.03921	0.0407035	0.310812
ENSBTAG00000005431	540474	LIM and cysteine rich domains 1 [Source:VGNC Symbol;Acc:VGNC:30926]	LMCD1	0.92286	0.925294	1.66511	0.0407892	0.311284
ENSBTAG00000015516	532940	coiled-coil domain containing 28A [Source:VGNC Symbol;Acc:VGNC:53785]	CCDC28A	-0.801326	-0.802492	2.19974	0.0408186	0.311325
ENSBTAG00000006072	532659	leucine rich repeat containing 59 [Source:VGNC Symbol;Acc:VGNC:55843]	LRRC59	0.709788	0.709886	6.10389	0.0408819	0.311626
ENSBTAG00000016510	512692	ribosomal RNA processing 7 homolog [Source:VGNC Symbol;Acc:VGNC:96875]	RRP7	0.734185	0.734449	5.01289	0.0409267	0.311784
ENSBTAG00000007435	513278	nucleolar and coiled-body phosphoprotein 1 [Source:VGNC Symbol;Acc:VGNC:32161]	NOLC1	0.679175	0.679214	7.59804	0.04107	0.312621
ENSBTAG00000039815	#N/A	zinc finger and BTB domain containing 6 [Source:VGNC Symbol;Acc:VGNC:37088]	ZBTB6	-0.792274	-0.793405	2.34878	0.0410844	0.312621
ENSBTAG00000011241	513050	4-hydroxyphenylpyruvate dioxygenase like [Source:VGNC Symbol;Acc:VGNC:29940]	HPDL	1.11914	1.14396	-0.365336	0.0412951	0.31404
ENSBTAG00000043959	613787	platelet derived growth factor C [Source:VGNC Symbol;Acc:VGNC:53915]	PDGFC	-0.699348	-0.699437	5.5254	0.0414887	0.315239
ENSBTAG00000012518	509388	protocadherin 1 [Source:VGNC Symbol;Acc:VGNC:32615]	PCDH1	0.792953	0.793076	6.63081	0.0415011	0.315239
ENSBTAG00000013249	527574	spalt like transcription factor 2 [Source:NCBI gene (formerly Entrezgene);Acc:527574]	SALL2	-0.761921	-0.762174	4.32266	0.0415731	0.315602
ENSBTAG00000001847	532280	centlein [Source:VGNC Symbol;Acc:VGNC:56940]	CNTLN	-0.728774	-0.728857	5.58118	0.0416057	0.315665
ENSBTAG00000022244	539375	actinin alpha 3 [Source:VGNC Symbol;Acc:VGNC:53654]	ACTN3	0.802595	0.802821	4.9358	0.0419091	0.31763
ENSBTAG00000017492	521261	protein-L-isoaspartate (D-aspartate) O-methyltransferase domain containing 1 [Source:VGNC Symbol;Acc:VGNC:53871]	PCMTD1	-0.692767	-0.69282	6.37717	0.0419134	0.31763
ENSBTAG00000021790	506138	apolipoprotein O like [Source:VGNC Symbol;Acc:VGNC:26036]	APOOL	-0.76305	-0.763288	4.24511	0.0420651	0.318594
ENSBTAG00000017951	617899	DNA polymerase delta 4, accessory subunit [Source:NCBI gene (formerly Entrezgene);Acc:617899]	POLD4	1.07901	1.08209	2.14898	0.0421736	0.319231
ENSBTAG00000015297	100299906	B cell scaffold protein with ankyrin repeats 1 [Source:NCBI gene (formerly Entrezgene);Acc:100299906]	BANK1	-0.989935	-0.998213	-0.133423	0.0422371	0.319525
ENSBTAG00000011956	617053	cyclin and CBS domain divalent metal cation transport mediator 1 [Source:VGNC Symbol;Acc:VGNC:27510]	CNNM1	1.65551	1.72244	-0.687229	0.0422656	0.319529
ENSBTAG00000026369	617091	ectodermal-neural cortex 1 [Source:VGNC Symbol;Acc:VGNC:28489]	ENC1	0.706968	0.707014	7.69312	0.0422867	0.319529
ENSBTAG00000013479	768005	SLC9A3 regulator 2 [Source:VGNC Symbol;Acc:VGNC:34942]	SLC9A3R2	0.925714	0.928243	1.95819	0.0423929	0.320147
ENSBTAG00000055223	#N/A	0	0	-0.971104	-0.978139	0.256545	0.0427548	0.322692
ENSBTAG00000009459	538547	microtubule crosslinking factor 1 [Source:VGNC Symbol;Acc:VGNC:31718]	MTCL1	0.782638	0.783181	3.95488	0.0430432	0.324681
ENSBTAG00000050056	#N/A	0	0	-0.78766	-0.789751	1.29387	0.0431427	0.325055
ENSBTAG00000019754	510203	caveolae associated protein 3 [Source:VGNC Symbol;Acc:VGNC:26804]	CAVIN3	0.773612	0.773789	5.30864	0.0431502	0.325055
ENSBTAG00000044192	782481	MAF bZIP transcription factor [Source:VGNC Symbol;Acc:VGNC:57051]	MAF	-0.773432	-0.773959	3.0984	0.0431677	0.325055
ENSBTAG00000000512	527488	syntrophin alpha 1 [Source:VGNC Symbol;Acc:VGNC:35083]	SNTA1	0.767407	0.768394	2.8969	0.0434117	0.326704
ENSBTAG00000000076	517232	reversion inducing cysteine rich protein with kazal motifs [Source:VGNC Symbol;Acc:VGNC:33847]	RECK	-0.686964	-0.687022	6.18467	0.043441	0.326736
ENSBTAG00000017296	523362	DNA polymerase nu [Source:VGNC Symbol;Acc:VGNC:33129]	POLN	-0.865053	-0.868811	0.688685	0.0438572	0.329636
ENSBTAG00000025788	618791	MPV17 mitochondrial inner membrane protein like 2 [Source:VGNC Symbol;Acc:VGNC:31590]	MPV17L2	0.878333	0.879521	2.88678	0.0438772	0.329636
ENSBTAG00000018045	533876	solute carrier family 12 member 4 [Source:VGNC Symbol;Acc:VGNC:34667]	SLC12A4	0.754212	0.754254	7.55642	0.0440466	0.330718
ENSBTAG00000051210	281806	glutathione S-transferase pi 1 [Source:NCBI gene (formerly Entrezgene);Acc:281806]	GSTP1	0.914115	0.914192	7.11378	0.0441063	0.330975
ENSBTAG00000052518	539149	tubulin beta 4B class IVb [Source:NCBI gene (formerly Entrezgene);Acc:539149]	TUBB4B	0.841314	0.841382	6.90637	0.0443407	0.332543
ENSBTAG00000048612	#N/A	0	0	-0.818268	-0.82168	0.722916	0.0443899	0.33272
ENSBTAG00000054057	281361	neuregulin 1 [Source:NCBI gene (formerly Entrezgene);Acc:281361]	NRG1	1.26409	1.2958	-0.513401	0.0445489	0.333651
ENSBTAG00000045565	513680	NHS like 2 [Source:VGNC Symbol;Acc:VGNC:32073]	NHSL2	-0.767734	-0.768521	2.53554	0.0445654	0.333651
ENSBTAG00000052744	613483	chromosome 18 C16orf74 homolog [Source:NCBI gene (formerly Entrezgene);Acc:613483]	0	0.925828	0.929148	1.58106	0.0446046	0.333753
ENSBTAG00000012142	514440	RAD18 E3 ubiquitin protein ligase [Source:VGNC Symbol;Acc:VGNC:33679]	RAD18	0.72007	0.720211	5.66631	0.0446941	0.333973
ENSBTAG00000020214	517584	leucine rich repeat containing 8 VRAC subunit B [Source:VGNC Symbol;Acc:VGNC:31030]	LRRC8B	0.684123	0.684349	4.95757	0.0447031	0.333973
ENSBTAG00000032187	540379	zinc finger protein 697 [Source:VGNC Symbol;Acc:VGNC:37331]	ZNF697	0.847332	0.849981	1.87085	0.0447145	0.333973
ENSBTAG00000007816	787045	0	0	-0.690318	-0.690439	5.23049	0.0447366	0.333973
ENSBTAG00000005760	534649	TBC1 domain family member 4 [Source:VGNC Symbol;Acc:VGNC:35644]	TBC1D4	-0.74615	-0.746176	7.52933	0.0448851	0.334891
ENSBTAG00000025803	613490	inhibitory synaptic factor 1 [Source:VGNC Symbol;Acc:VGNC:55116]	INSYN1	-0.98475	-0.99773	-0.584215	0.0451439	0.336625
ENSBTAG00000005021	506636	semaphorin 5A [Source:VGNC Symbol;Acc:VGNC:34439]	SEMA5A	-0.757157	-0.75722	6.00231	0.0451693	0.336625
ENSBTAG00000017970	768226	zyxin [Source:VGNC Symbol;Acc:VGNC:37395]	ZYX	0.847634	0.847658	8.32071	0.0451988	0.336652
ENSBTAG00000008406	282099	three prime repair exonuclease 1 [Source:VGNC Symbol;Acc:VGNC:36303]	TREX1	1.01103	1.01335	2.41899	0.0452966	0.337188
ENSBTAG00000003334	534106	ArfGAP with dual PH domains 2 [Source:VGNC Symbol;Acc:VGNC:25634]	ADAP2	-0.889207	-0.893273	0.438327	0.0453906	0.337694
ENSBTAG00000026326	614645	sialophorin [Source:VGNC Symbol;Acc:VGNC:35224]	SPN	1.55981	1.61555	-0.625848	0.0454438	0.337897
ENSBTAG00000021394	510040	fat storage inducing transmembrane protein 1 [Source:VGNC Symbol;Acc:VGNC:29015]	FITM1	-0.871843	-0.87467	1.17609	0.0455431	0.338443
ENSBTAG00000030258	511099	CDC42 effector protein 1 [Source:VGNC Symbol;Acc:VGNC:27072]	CDC42EP1	0.904124	0.904332	5.40799	0.0457974	0.340139
ENSBTAG00000015408	506946	deoxythymidylate kinase [Source:VGNC Symbol;Acc:VGNC:28240]	DTYMK	0.776802	0.777131	4.48413	0.0460545	0.341853
ENSBTAG00000051340	#N/A	0	0	0.982155	0.993557	0.349905	0.0461511	0.342375
ENSBTAG00000051621	100848905	SLX4 interacting protein [Source:VGNC Symbol;Acc:VGNC:57024]	SLX4IP	-0.701209	-0.701363	4.70279	0.0462378	0.342823
ENSBTAG00000015569	516469	enkurin, TRPC channel interacting protein [Source:VGNC Symbol;Acc:VGNC:28496]	ENKUR	-0.875874	-0.879025	0.933924	0.0463706	0.343612
ENSBTAG00000038063	515342	lipase family member J [Source:VGNC Symbol;Acc:VGNC:30906]	LIPJ	0.927655	0.935829	0.396559	0.0464714	0.344163
ENSBTAG00000009055	524166	ring finger protein 144B [Source:VGNC Symbol;Acc:VGNC:34027]	RNF144B	-0.854824	-0.856124	1.84658	0.0465708	0.344704
ENSBTAG00000013755	282564	integrin subunit beta 5 [Source:VGNC Symbol;Acc:VGNC:30330]	ITGB5	-0.703356	-0.703464	5.25428	0.0466982	0.34545
ENSBTAG00000003472	523479	ATP binding cassette subfamily A member 12 [Source:VGNC Symbol;Acc:VGNC:25456]	ABCA12	0.776336	0.777145	3.21973	0.0469869	0.347389
ENSBTAG00000051039	#N/A	0	0	-0.76187	-0.763482	1.48838	0.0474067	0.350293
ENSBTAG00000045948	#N/A	colony stimulating factor 2 receptor subunit alpha [Source:VGNC Symbol;Acc:VGNC:55042]	CSF2RA	-0.885581	-0.889319	0.636933	0.0475058	0.350826
ENSBTAG00000020766	511762	ATP binding cassette subfamily A member 7 [Source:VGNC Symbol;Acc:VGNC:25461]	ABCA7	-0.872838	-0.874135	1.95938	0.0475659	0.351072
ENSBTAG00000043565	#N/A	0	0	-1.09774	-1.10862	-0.38197	0.0476897	0.351786
ENSBTAG00000054686	525174	CRACD like [Source:NCBI gene (formerly Entrezgene);Acc:525174]	CRACDL	-0.765536	-0.766109	2.8224	0.0477751	0.352216
ENSBTAG00000031696	526800	ankyrin repeat domain 44 [Source:VGNC Symbol;Acc:VGNC:55324]	ANKRD44	-0.717631	-0.717864	4.09273	0.0479011	0.352946
ENSBTAG00000030864	100125925	family with sequence similarity 228 member B [Source:NCBI gene (formerly Entrezgene);Acc:100125925]	FAM228B	-0.912423	-0.916429	0.706591	0.0480454	0.353809
ENSBTAG00000004826	517002	acid phosphatase 5, tartrate resistant [Source:VGNC Symbol;Acc:VGNC:25556]	ACP5	1.02746	1.0436	-0.485606	0.0480902	0.353938
ENSBTAG00000012144	616678	zinc finger MYND-type containing 19 [Source:VGNC Symbol;Acc:VGNC:37205]	ZMYND19	0.832355	0.833603	2.76859	0.0481336	0.353987
ENSBTAG00000043584	3283882	ATP synthase F0 subunit 6 [Source:NCBI gene (formerly Entrezgene);Acc:3283882]	ATP6	-0.689309	-0.68931	12.0569	0.0481512	0.353987
ENSBTAG00000014733	541169	NOP2 nucleolar protein [Source:VGNC Symbol;Acc:VGNC:32167]	NOP2	0.725215	0.725329	6.15391	0.048251	0.354521
ENSBTAG00000013357	514957	pumilio RNA binding family member 3 [Source:VGNC Symbol;Acc:VGNC:33571]	PUM3	0.673963	0.674074	6.02461	0.0484231	0.355585
ENSBTAG00000020539	540002	chondroitin polymerizing factor [Source:VGNC Symbol;Acc:VGNC:27312]	CHPF	0.907168	0.908033	3.4902	0.0486031	0.356706
ENSBTAG00000051499	#N/A	0	0	-1.00547	-1.00924	0.568177	0.0487914	0.357886
ENSBTAG00000038682	524974	family with sequence similarity 83 member H [Source:VGNC Symbol;Acc:VGNC:28839]	FAM83H	0.785843	0.785968	5.90929	0.0488868	0.358384
ENSBTAG00000045547	#N/A	adhesion molecule with Ig like domain 3 [Source:VGNC Symbol;Acc:VGNC:25867]	AMIGO3	0.892008	0.893168	2.8665	0.0490017	0.359024
ENSBTAG00000039861	654488	2',5'-oligoadenylate synthetase 1, 40/46kDa [Source:NCBI gene (formerly Entrezgene);Acc:654488]	OAS1Y	-1.00679	-1.01187	0.424928	0.0491128	0.359517
ENSBTAG00000017752	768062	dynein light chain roadblock-type 2 [Source:VGNC Symbol;Acc:VGNC:28277]	DYNLRB2	-0.812607	-0.814359	1.54715	0.0491464	0.359517
ENSBTAG00000050317	504663	mitochondrial ribosomal protein L36 [Source:NCBI gene (formerly Entrezgene);Acc:504663]	0	0.812305	0.814145	2.05514	0.0491517	0.359517
ENSBTAG00000006022	505224	ATPase H+ transporting V0 subunit e2 [Source:VGNC Symbol;Acc:VGNC:26315]	ATP6V0E2	0.732486	0.732668	5.29897	0.0492028	0.359688
ENSBTAG00000002526	515321	3-hydroxybutyrate dehydrogenase 2 [Source:VGNC Symbol;Acc:VGNC:26458]	BDH2	-0.675102	-0.675161	6.17995	0.0493195	0.360164
ENSBTAG00000017010	512069	family with sequence similarity 207 member A [Source:VGNC Symbol;Acc:VGNC:28782]	FAM207A	0.931594	0.93385	2.21894	0.0493231	0.360164
ENSBTAG00000021841	533175	chromodomain helicase DNA binding protein 7 [Source:VGNC Symbol;Acc:VGNC:27282]	CHD7	0.726375	0.726757	4.1631	0.049378	0.360355
ENSBTAG00000047594	100301247	cyclin O [Source:VGNC Symbol;Acc:VGNC:26977]	CCNO	1.22896	1.24272	0.330425	0.0494046	0.360355
ENSBTAG00000010370	512628	clathrin binding box of aftiphilin containing 1 [Source:VGNC Symbol;Acc:VGNC:53934]	CLBA1	0.74839	0.749471	3.47259	0.0496048	0.361565
ENSBTAG00000018073	281033	translocator protein [Source:VGNC Symbol;Acc:VGNC:49066]	TSPO	0.865235	0.865425	5.62847	0.049626	0.361565
ENSBTAG00000014699	538402	family with sequence similarity 81 member A [Source:VGNC Symbol;Acc:VGNC:28830]	FAM81A	0.897566	0.898491	2.97727	0.0496716	0.361694
ENSBTAG00000008493	780866	aquaporin 3 [Source:VGNC Symbol;Acc:VGNC:56935]	AQP3	1.80087	1.93758	-0.845813	0.0497488	0.362054
ENSBTAG00000011888	516188	coiled-coil domain containing 24 [Source:VGNC Symbol;Acc:VGNC:26887]	CCDC24	0.918141	0.921158	1.46193	0.0500037	0.363706
ENSBTAG00000020366	618429	transducin beta like 3 [Source:VGNC Symbol;Acc:VGNC:35659]	TBL3	0.966132	0.967465	3.02936	0.0500763	0.364031
ENSBTAG00000038180	539718	sodium voltage-gated channel alpha subunit 2 [Source:VGNC Symbol;Acc:VGNC:34347]	SCN2A	0.757281	0.759133	1.9908	0.0501504	0.364183
ENSBTAG00000007809	100141235	protein phosphatase 1 regulatory subunit 36 [Source:VGNC Symbol;Acc:VGNC:33240]	PPP1R36	-0.753117	-0.753818	2.7868	0.0501531	0.364183
ENSBTAG00000013607	533223	WD repeat domain 1 [Source:VGNC Symbol;Acc:VGNC:36880]	WDR1	0.70283	0.70285	8.32437	0.0503315	0.365275
ENSBTAG00000008365	#N/A	ankyrin repeat domain 34A [Source:VGNC Symbol;Acc:VGNC:25924]	ANKRD34A	1.0854	1.09714	0.0461098	0.0503761	0.365395
ENSBTAG00000020457	282089	transforming growth factor beta 1 [Source:VGNC Symbol;Acc:VGNC:35800]	TGFB1	0.726539	0.726761	5.11422	0.0505133	0.366005
ENSBTAG00000043377	112448603	Small nucleolar RNA SNORD16 [Source:RFAM;Acc:RF00138]	SNORD16	0.840358	0.844263	1.27015	0.0505164	0.366005
ENSBTAG00000044185	534321	SRY-box transcription factor 6 [Source:VGNC Symbol;Acc:VGNC:35150]	SOX6	-0.811972	-0.813745	1.27161	0.0508052	0.367736
ENSBTAG00000008987	514773	suppressor of cytokine signaling 5 [Source:VGNC Symbol;Acc:VGNC:35123]	SOCS5	-0.699099	-0.699221	5.26966	0.0508118	0.367736
ENSBTAG00000038283	614280	transmembrane protein 243 [Source:VGNC Symbol;Acc:VGNC:36054]	TMEM243	0.791798	0.794861	1.44058	0.0508888	0.367932
ENSBTAG00000006754	503577	D-box binding PAR bZIP transcription factor [Source:VGNC Symbol;Acc:VGNC:27894]	DBP	-0.878127	-0.881525	0.911592	0.050909	0.367932
ENSBTAG00000015027	#N/A	0	0	-0.800687	-0.80392	0.624545	0.0509493	0.367932
ENSBTAG00000007302	282868	solute carrier family 2 (facilitated glucose/fructose transporter), member 5 [Source:NCBI gene (formerly Entrezgene);Acc:282868]	SLC2A5	0.953956	0.963362	0.00358743	0.0509518	0.367932
ENSBTAG00000021057	504932	transmembrane protein 190 [Source:VGNC Symbol;Acc:VGNC:36016]	TMEM190	0.790393	0.792209	2.33141	0.0513624	0.37053
ENSBTAG00000013636	511887	diacylglycerol kinase zeta [Source:VGNC Symbol;Acc:VGNC:54417]	DGKZ	0.8048	0.805142	4.51098	0.0513684	0.37053
ENSBTAG00000019216	281556	Tu translation elongation factor, mitochondrial [Source:VGNC Symbol;Acc:VGNC:36517]	TUFM	0.739539	0.739593	7.34494	0.051433	0.37079
ENSBTAG00000009126	614429	Y-box binding protein 2 [Source:VGNC Symbol;Acc:VGNC:37017]	YBX2	0.80012	0.801902	2.40785	0.0516533	0.372024
ENSBTAG00000003332	531274	ribonuclease P/MRP subunit p40 [Source:VGNC Symbol;Acc:VGNC:34125]	RPP40	0.73443	0.735098	3.70577	0.0516787	0.372024
ENSBTAG00000009115	512922	splA/ryanodine receptor domain and SOCS box containing 4 [Source:VGNC Symbol;Acc:VGNC:35249]	SPSB4	-0.889343	-0.892962	0.49016	0.0516899	0.372024
ENSBTAG00000048719	#N/A	0	0	-1.29554	-1.31836	-1.28972	0.0521362	0.375029
ENSBTAG00000017017	767849	CTP synthase 2 [Source:VGNC Symbol;Acc:VGNC:27809]	CTPS2	-0.730402	-0.730805	3.45822	0.0521924	0.375227
ENSBTAG00000021742	613546	zinc finger protein 568 [Source:VGNC Symbol;Acc:VGNC:58431]	ZNF568	-0.710636	-0.711141	3.10469	0.0522361	0.375334
ENSBTAG00000020600	512924	ras homolog family member D [Source:VGNC Symbol;Acc:VGNC:33947]	RHOD	0.835993	0.83666	3.68916	0.0525158	0.377135
ENSBTAG00000015037	783429	GRB2 associated regulator of MAPK1 subtype 2 [Source:VGNC Symbol;Acc:VGNC:58378]	GAREM2	0.911968	0.91541	1.73829	0.0526229	0.377696
ENSBTAG00000047680	100125591	interferon regulatory factor 7 [Source:VGNC Symbol;Acc:VGNC:30278]	IRF7	1.0221	1.02525	2.21237	0.0526528	0.377703
ENSBTAG00000011081	530516	kelch repeat and BTB domain containing 8 [Source:VGNC Symbol;Acc:VGNC:30418]	KBTBD8	0.730108	0.731015	3.09051	0.0527437	0.378146
ENSBTAG00000019168	507670	paired like homeobox 2A [Source:VGNC Symbol;Acc:VGNC:32844]	PHOX2A	1.31817	1.37718	-0.570939	0.0529516	0.379428
ENSBTAG00000020448	#N/A	0	0	1.00553	1.01271	0.779073	0.0531135	0.380379
ENSBTAG00000046989	526978	mannosidase endo-alpha like [Source:VGNC Symbol;Acc:VGNC:31170]	MANEAL	0.946718	0.957025	0.486835	0.0533219	0.381662
ENSBTAG00000017187	533569	transmembrane protein 255A [Source:VGNC Symbol;Acc:VGNC:36064]	TMEM255A	-1.05644	-1.0625	0.335382	0.053427	0.382204
ENSBTAG00000025826	282474	solute carrier family 24 member 1 [Source:VGNC Symbol;Acc:VGNC:34736]	SLC24A1	0.987205	0.99546	1.16751	0.0535842	0.383118
ENSBTAG00000009811	515056	BOP1 ribosomal biogenesis factor [Source:VGNC Symbol;Acc:VGNC:26540]	BOP1	0.860936	0.86164	3.8203	0.0536424	0.383324
ENSBTAG00000004406	505542	musashi RNA binding protein 2 [Source:NCBI gene (formerly Entrezgene);Acc:505542]	MSI2	-0.766161	-0.767211	2.00093	0.0537048	0.383465
ENSBTAG00000004221	539571	endothelial cell specific molecule 1 [Source:VGNC Symbol;Acc:VGNC:28602]	ESM1	1.84559	1.90651	3.39803	0.053721	0.383465
ENSBTAG00000031061	617375	RNA polymerase II, I and III subunit L [Source:VGNC Symbol;Acc:VGNC:33144]	POLR2L	0.952206	0.954782	2.04992	0.0539553	0.384796
ENSBTAG00000006785	282601	ADP-ribosylation factor 2 [Source:NCBI gene (formerly Entrezgene);Acc:282601]	ARF2	0.678523	0.678592	6.58802	0.0539665	0.384796
ENSBTAG00000011828	532938	AT-rich interaction domain 3B [Source:VGNC Symbol;Acc:VGNC:26127]	ARID3B	0.763538	0.764474	2.97901	0.0540558	0.385221
ENSBTAG00000030384	100139115	surfeit locus protein 1 [Source:NCBI gene (formerly Entrezgene);Acc:100139115]	SURF1	0.709265	0.70938	6.06394	0.0540902	0.385256
ENSBTAG00000004405	536449	IQ motif and ubiquitin domain containing [Source:VGNC Symbol;Acc:VGNC:30263]	IQUB	-0.91368	-0.921865	-0.179945	0.054146	0.385443
ENSBTAG00000006040	520720	UHRF1 binding protein 1 like [Source:VGNC Symbol;Acc:VGNC:36656]	UHRF1BP1L	-0.720554	-0.720619	6.34693	0.0543376	0.386595
ENSBTAG00000040603	#N/A	zinc finger protein 175 [Source:VGNC Symbol;Acc:VGNC:49992]	ZNF175	-0.697465	-0.697606	4.99253	0.0546329	0.388484
ENSBTAG00000013406	539381	cysteine and glycine rich protein 2 [Source:VGNC Symbol;Acc:VGNC:27774]	CSRP2	0.694679	0.694803	5.956	0.0546753	0.388574
ENSBTAG00000015366	518004	secreted frizzled related protein 4 [Source:VGNC Symbol;Acc:VGNC:34522]	SFRP4	2.08405	2.298	-0.698618	0.0547411	0.388829
ENSBTAG00000050754	#N/A	0	0	1.40596	1.44298	-0.795619	0.0547939	0.388992
ENSBTAG00000011589	520428	cell division cycle 14B [Source:VGNC Symbol;Acc:VGNC:56939]	CDC14B	-0.677349	-0.67738	7.01374	0.0548852	0.389428
ENSBTAG00000052226	#N/A	0	0	0.821646	0.822905	2.84656	0.0549863	0.389933
ENSBTAG00000016554	613977	chromosome 1 C3orf52 homolog [Source:VGNC Symbol;Acc:VGNC:52666]	C1H3orf52	1.20363	1.22148	-0.267782	0.0551737	0.390845
ENSBTAG00000016515	616742	ephrin A5 [Source:VGNC Symbol;Acc:VGNC:28358]	EFNA5	-0.758478	-0.758758	3.89238	0.055175	0.390845
ENSBTAG00000050417	788334	apolipoprotein L3 [Source:NCBI gene (formerly Entrezgene);Acc:788334]	0	1.1038	1.11778	0.260605	0.0552896	0.391272
ENSBTAG00000010801	516405	carboxymethylenebutenolidase homolog [Source:VGNC Symbol;Acc:VGNC:27477]	CMBL	-0.691933	-0.69202	5.59246	0.0552953	0.391272
ENSBTAG00000021809	532586	DEP domain containing 7 [Source:VGNC Symbol;Acc:VGNC:28007]	DEPDC7	0.740858	0.741137	4.84403	0.0554376	0.392066
ENSBTAG00000002082	613548	myristoylated alanine rich protein kinase C substrate [Source:VGNC Symbol;Acc:VGNC:31244]	MARCKS	-0.778937	-0.779069	5.16732	0.0557133	0.393802
ENSBTAG00000055140	100297496	C-type lectin domain family 2, member B [Source:NCBI gene (formerly Entrezgene);Acc:100297496]	0	0.851535	0.85643	1.5021	0.0558709	0.394623
ENSBTAG00000038062	282854	fucosyltransferase 4 [Source:VGNC Symbol;Acc:VGNC:29150]	FUT4	0.839863	0.842525	1.50017	0.0558901	0.394623
ENSBTAG00000050473	615789	proline rich 16 [Source:NCBI gene (formerly Entrezgene);Acc:615789]	PRR16	-0.815472	-0.817536	1.37549	0.0564622	0.398447
ENSBTAG00000046803	540336	growth arrest specific 1 [Source:VGNC Symbol;Acc:VGNC:29256]	GAS1	-0.890748	-0.891739	2.15706	0.0565861	0.399105
ENSBTAG00000001598	506766	microtubule associated protein 7 [Source:VGNC Symbol;Acc:VGNC:31210]	MAP7	-0.753533	-0.754116	2.72878	0.0568959	0.401073
ENSBTAG00000010219	512939	KRAB-A domain containing 1 [Source:VGNC Symbol;Acc:VGNC:30711]	KRBA1	0.981342	0.983339	2.56918	0.0570259	0.401685
ENSBTAG00000012566	781199	microtubule associated protein 10 [Source:VGNC Symbol;Acc:VGNC:31176]	MAP10	-0.694618	-0.69485	4.3138	0.0570444	0.401685
ENSBTAG00000030208	101905782	erythroferrone [Source:VGNC Symbol;Acc:VGNC:28577]	ERFE	1.37945	1.40117	0.0436622	0.0572231	0.402513
ENSBTAG00000047972	100299473	innate immunity activator [Source:VGNC Symbol;Acc:VGNC:30192]	INAVA	1.31503	1.3313	0.328756	0.0572238	0.402513
ENSBTAG00000052264	#N/A	0	0	-0.8943	-0.900696	-0.0727262	0.0573175	0.402955
ENSBTAG00000016559	533578	nudix hydrolase 22 [Source:VGNC Symbol;Acc:VGNC:32337]	NUDT22	1.03878	1.04117	2.75663	0.0574759	0.403851
ENSBTAG00000012721	506001	4-hydroxy-2-oxoglutarate aldolase 1 [Source:VGNC Symbol;Acc:VGNC:29900]	HOGA1	0.823108	0.824182	2.67041	0.057536	0.404055
ENSBTAG00000052862	539209	dishevelled binding antagonist of beta catenin 3 [Source:NCBI gene (formerly Entrezgene);Acc:539209]	0	0.82176	0.823805	1.97	0.0576014	0.404296
ENSBTAG00000009358	521855	MTSS I-BAR domain containing 2 [Source:VGNC Symbol;Acc:VGNC:31753]	MTSS2	0.841758	0.842435	3.68065	0.0576552	0.404434
ENSBTAG00000013469	535629	SRC kinase signaling inhibitor 1 [Source:VGNC Symbol;Acc:VGNC:35270]	SRCIN1	1.00238	1.02233	-0.283804	0.0576831	0.404434
ENSBTAG00000006507	534082	ADAM metallopeptidase with thrombospondin type 1 motif 3 [Source:VGNC Symbol;Acc:VGNC:25626]	ADAMTS3	-0.702754	-0.702961	4.85528	0.0578109	0.405112
ENSBTAG00000010504	767855	transforming growth factor beta regulator 4 [Source:VGNC Symbol;Acc:VGNC:35664]	TBRG4	0.811334	0.81164	4.93213	0.0579086	0.405387
ENSBTAG00000012261	506911	RAB19, member RAS oncogene family [Source:VGNC Symbol;Acc:VGNC:33625]	RAB19	-0.964495	-0.976029	-0.667862	0.0579124	0.405387
ENSBTAG00000018206	781492	NIPA like domain containing 2 [Source:VGNC Symbol;Acc:VGNC:32082]	NIPAL2	-0.710954	-0.711181	4.20205	0.0581874	0.406914
ENSBTAG00000047707	282493	major histocompatibility complex, class II, DO beta [Source:NCBI gene (formerly Entrezgene);Acc:282493]	BOLA-DOB	1.36999	1.41549	-0.645449	0.0581931	0.406914
ENSBTAG00000011146	614242	RAB8B, member RAS oncogene family [Source:VGNC Symbol;Acc:VGNC:33663]	RAB8B	-0.696813	-0.696874	6.25182	0.0584763	0.408675
ENSBTAG00000048067	100296460	elongin BC and polycomb repressive complex 2 associated protein [Source:VGNC Symbol;Acc:VGNC:28550]	EPOP	1.55052	1.59396	-0.570695	0.0585127	0.40871
ENSBTAG00000003051	536759	FER tyrosine kinase [Source:VGNC Symbol;Acc:VGNC:28948]	FER	-0.69871	-0.698841	4.83614	0.0586487	0.409252
ENSBTAG00000021444	540060	twist family bHLH transcription factor 2 [Source:VGNC Symbol;Acc:VGNC:36526]	TWIST2	-0.754206	-0.754983	2.65915	0.058653	0.409252
ENSBTAG00000020747	280726	argininosuccinate synthase 1 [Source:VGNC Symbol;Acc:VGNC:26224]	ASS1	0.723484	0.723928	3.88442	0.0587144	0.40946
ENSBTAG00000000857	527884	solute carrier family 52 member 2 [Source:NCBI gene (formerly Entrezgene);Acc:527884]	SLC52A2	0.817086	0.817339	4.99981	0.0587939	0.409796
ENSBTAG00000010658	508683	phosphofructokinase, liver type [Source:VGNC Symbol;Acc:VGNC:32773]	PFKL	0.765407	0.765511	6.15906	0.0588432	0.40992
ENSBTAG00000015599	782793	protein kinase D2 [Source:VGNC Symbol;Acc:VGNC:33337]	PRKD2	0.717682	0.71788	5.13864	0.0590412	0.41108
ENSBTAG00000045901	511318	claudin 6 [Source:VGNC Symbol;Acc:VGNC:27418]	CLDN6	1.5877	1.71598	-0.956649	0.0592436	0.412268
ENSBTAG00000004651	404189	non-metastatic cells 1, protein (NM23A) expressed in [Source:NCBI gene (formerly Entrezgene);Acc:404189]	NME1	0.672544	0.672698	5.65816	0.0596077	0.414581
ENSBTAG00000002473	509963	angiopoietin like 4 [Source:VGNC Symbol;Acc:VGNC:25893]	ANGPTL4	0.924254	0.926968	1.97833	0.0596855	0.4149
ENSBTAG00000039705	509113	HGH1 homolog [Source:VGNC Symbol;Acc:VGNC:29835]	HGH1	0.737476	0.737683	5.22262	0.0598535	0.415846
ENSBTAG00000054196	#N/A	0	0	-0.854769	-0.860971	0.0249309	0.0599396	0.416222
ENSBTAG00000020073	534212	neutral cholesterol ester hydrolase 1 [Source:VGNC Symbol;Acc:VGNC:31911]	NCEH1	0.863838	0.867226	1.52747	0.059976	0.416253
ENSBTAG00000031871	515716	NFKB activating protein like [Source:VGNC Symbol;Acc:VGNC:54230]	NKAPL	-0.740251	-0.74089	2.85327	0.0600781	0.41674
ENSBTAG00000004969	539952	leucine rich repeat containing 14 [Source:VGNC Symbol;Acc:VGNC:30999]	LRRC14	0.87962	0.881557	2.08782	0.0601228	0.416828
ENSBTAG00000015579	508953	transmembrane protein 160 [Source:VGNC Symbol;Acc:VGNC:35985]	TMEM160	1.06162	1.06464	1.95407	0.0603815	0.418399
ENSBTAG00000030775	613725	poly(rC) binding protein 3 [Source:VGNC Symbol;Acc:VGNC:53597]	PCBP3	-0.744046	-0.744664	2.68815	0.0604515	0.418661
ENSBTAG00000014863	444863	glycophorin C [Source:VGNC Symbol;Acc:VGNC:49062]	GYPC	-0.853725	-0.854686	2.26683	0.0607458	0.420476
ENSBTAG00000020283	507061	dual specificity phosphatase 5 [Source:VGNC Symbol;Acc:VGNC:28261]	DUSP5	0.72787	0.729451	2.37712	0.0608864	0.421038
ENSBTAG00000038486	101904668	putative UDP-GlcNAc:betaGal beta-1,3-N-acetylglucosaminyltransferase LOC100288842 [Source:NCBI gene (formerly Entrezgene);Acc:101904668]	B3GNT10	-0.854793	-0.861779	0.0102521	0.0608916	0.421038
ENSBTAG00000017649	786670	Scm polycomb group protein like 1 [Source:VGNC Symbol;Acc:VGNC:56953]	SCML1	-0.698112	-0.698351	4.14553	0.0610028	0.421583
ENSBTAG00000003508	100847237	cilia and flagella associated protein 69 [Source:VGNC Symbol;Acc:VGNC:27249]	CFAP69	-0.726517	-0.727213	2.60802	0.0611808	0.422589
ENSBTAG00000000480	767939	interferon related developmental regulator 2 [Source:VGNC Symbol;Acc:VGNC:30063]	IFRD2	0.805683	0.806826	3.18939	0.0612619	0.422925
ENSBTAG00000012805	526460	tetraspanin 13 [Source:VGNC Symbol;Acc:VGNC:36428]	TSPAN13	0.729973	0.730029	7.06743	0.0612988	0.422955
ENSBTAG00000010069	407125	early growth response 1 [Source:VGNC Symbol;Acc:VGNC:52766]	EGR1	0.773138	0.773221	7.26017	0.061457	0.423673
ENSBTAG00000039529	615438	BTB domain containing 19 [Source:VGNC Symbol;Acc:VGNC:26588]	BTBD19	0.667352	0.667532	5.19204	0.0614679	0.423673
ENSBTAG00000023429	616560	plastin 1 [Source:VGNC Symbol;Acc:VGNC:33051]	PLS1	0.793904	0.793967	7.4586	0.0617551	0.425428
ENSBTAG00000024482	540101	RAB GTPase activating protein 1 like [Source:NCBI gene (formerly Entrezgene);Acc:540101]	0	-0.723504	-0.723869	3.45705	0.0621114	0.427656
ENSBTAG00000017689	615952	BRMS1 transcriptional repressor and anoikis regulator [Source:VGNC Symbol;Acc:VGNC:54781]	BRMS1	0.750916	0.751144	4.95296	0.0623691	0.429204
ENSBTAG00000021013	540236	tubulin beta 4A class IVa [Source:VGNC Symbol;Acc:VGNC:36507]	TUBB4A	0.718201	0.718805	3.32745	0.0625236	0.42974
ENSBTAG00000007619	617640	pseudouridine synthase like 1 [Source:VGNC Symbol;Acc:VGNC:33578]	PUSL1	0.762829	0.763812	3.14934	0.0625369	0.42974
ENSBTAG00000009694	614986	pseudouridine synthase 10 [Source:VGNC Symbol;Acc:VGNC:33575]	PUS10	-0.675249	-0.675412	4.70325	0.0625461	0.42974
ENSBTAG00000044138	100139217	methyltransferase like 23 [Source:VGNC Symbol;Acc:VGNC:97284]	METTL23	-0.753916	-0.754483	3.35948	0.0625793	0.429742
ENSBTAG00000017228	515682	tumor protein p53 inducible protein 11 [Source:NCBI gene (formerly Entrezgene);Acc:515682]	TP53I11	0.822862	0.823142	4.80435	0.0628143	0.431128
ENSBTAG00000008497	532605	regulator of G protein signaling 14 [Source:VGNC Symbol;Acc:VGNC:33914]	RGS14	0.785182	0.786869	2.1416	0.0629362	0.431562
ENSBTAG00000020373	534800	CFAP20 domain containing [Source:NCBI gene (formerly Entrezgene);Acc:534800]	CFAP20DC	-0.819017	-0.822167	0.670957	0.0629437	0.431562
ENSBTAG00000013027	617510	cholecystokinin [Source:VGNC Symbol;Acc:VGNC:26940]	CCK	2.78297	1.44269e+08	-1.26219	0.0630122	0.431804
ENSBTAG00000006167	520456	BTB (POZ) domain containing 8 [Source:NCBI gene (formerly Entrezgene);Acc:520456]	BTBD8	-0.70881	-0.709238	3.32735	0.0634097	0.433824
ENSBTAG00000003424	616526	Bet1 golgi vesicular membrane trafficking protein [Source:VGNC Symbol;Acc:VGNC:26475]	BET1	-0.68439	-0.684512	5.20927	0.0634163	0.433824
ENSBTAG00000001257	534958	ATP/GTP binding protein 1 [Source:VGNC Symbol;Acc:VGNC:25744]	AGTPBP1	-0.770427	-0.771534	1.93638	0.0634245	0.433824
ENSBTAG00000011614	100849042	phosphodiesterase 7A [Source:VGNC Symbol;Acc:VGNC:32685]	PDE7A	-0.784593	-0.786004	1.75066	0.0634401	0.433824
ENSBTAG00000006702	534165	eukaryotic translation initiation factor 3 subunit E [Source:VGNC Symbol;Acc:VGNC:28395]	EIF3E	-0.706194	-0.706205	8.66775	0.0635428	0.434125
ENSBTAG00000000473	536495	ATPase phospholipid transporting 10D (putative) [Source:VGNC Symbol;Acc:VGNC:55156]	ATP10D	-0.704626	-0.704791	4.61967	0.0635508	0.434125
ENSBTAG00000011733	518246	GIPC PDZ domain containing family member 2 [Source:VGNC Symbol;Acc:VGNC:29366]	GIPC2	-0.82561	-0.827252	1.65832	0.0637148	0.435017
ENSBTAG00000039951	540228	protein arginine methyltransferase 6 [Source:VGNC Symbol;Acc:VGNC:33351]	PRMT6	0.942979	0.946456	1.60488	0.0637967	0.435348
ENSBTAG00000004150	281361	neuregulin 1 [Source:VGNC Symbol;Acc:VGNC:32261]	NRG1	0.930652	0.938834	1.05225	0.063973	0.436322
ENSBTAG00000007976	615690	FAM3 metabolism regulating signaling molecule C [Source:VGNC Symbol;Acc:VGNC:28811]	FAM3C	-0.682803	-0.682839	6.96631	0.0640958	0.436824
ENSBTAG00000051765	618256	protein S100-A6 [Source:NCBI gene (formerly Entrezgene);Acc:618256]	0	-0.752741	-0.754051	2.15008	0.0641312	0.436824
ENSBTAG00000001931	513765	TraB domain containing [Source:VGNC Symbol;Acc:VGNC:58452]	TRABD	0.950253	0.952562	2.21266	0.0641526	0.436824
ENSBTAG00000052083	615773	methyltransferase like 21A [Source:NCBI gene (formerly Entrezgene);Acc:615773]	METTL21A	0.746476	0.748122	2.50681	0.0641807	0.436824
ENSBTAG00000050919	#N/A	0	0	0.823498	0.829438	1.02962	0.0642985	0.437398
ENSBTAG00000019798	281401	polymeric immunoglobulin receptor [Source:VGNC Symbol;Acc:VGNC:32876]	PIGR	1.28247	1.28983	0.825327	0.0643353	0.43742
ENSBTAG00000009806	529698	inversin [Source:VGNC Symbol;Acc:VGNC:30236]	INVS	-0.652722	-0.652811	5.42325	0.0645189	0.438439
ENSBTAG00000047761	#N/A	0	0	-0.838185	-0.842664	0.285944	0.0646096	0.438827
ENSBTAG00000005923	528597	ankyrin repeat and BTB domain containing 2 [Source:VGNC Symbol;Acc:VGNC:25516]	ABTB2	0.713609	0.713853	4.67672	0.0648854	0.44047
ENSBTAG00000020657	508251	FAT atypical cadherin 1 [Source:VGNC Symbol;Acc:VGNC:52771]	FAT1	0.73185	0.731858	9.9267	0.0649589	0.440739
ENSBTAG00000010175	539415	collagen type VIII alpha 2 chain [Source:VGNC Symbol;Acc:VGNC:27575]	COL8A2	0.722734	0.72314	3.90523	0.065226	0.442321
ENSBTAG00000012276	784446	0	0	-0.792087	-0.7932	2.3366	0.0654577	0.443661
ENSBTAG00000014969	520750	cartilage intermediate layer protein 2 [Source:VGNC Symbol;Acc:VGNC:27367]	CILP2	0.829602	0.832816	1.67433	0.0655066	0.443762
ENSBTAG00000019568	514024	intraflagellar transport 74 [Source:VGNC Symbol;Acc:VGNC:30072]	IFT74	-0.669147	-0.669271	5.11485	0.0655851	0.444063
ENSBTAG00000052396	#N/A	0	0	1.16617	1.17411	0.40161	0.0657113	0.444608
ENSBTAG00000051500	511794	zinc finger protein 389 [Source:NCBI gene (formerly Entrezgene);Acc:100270749]	ZNF389	-0.789354	-0.791354	1.46411	0.0657339	0.444608
ENSBTAG00000044726	#N/A	7SK RNA [Source:RFAM;Acc:RF00100]	7SK	-0.876473	-0.88601	-0.337439	0.0658262	0.445001
ENSBTAG00000024605	404151	dynein light chain LC8-type 1 [Source:NCBI gene (formerly Entrezgene);Acc:404151]	DYNLL1	0.772279	0.772658	4.41816	0.065877	0.445114
ENSBTAG00000016995	514441	haloacid dehalogenase like hydrolase domain containing 5 [Source:VGNC Symbol;Acc:VGNC:29790]	HDHD5	0.824477	0.825405	3.54847	0.0660824	0.44627
ENSBTAG00000002842	101902938	HEAT repeat containing 4 [Source:VGNC Symbol;Acc:VGNC:29793]	HEATR4	-0.753652	-0.755456	1.42746	0.0661696	0.446628
ENSBTAG00000019070	534497	peripheral myelin protein 22 [Source:VGNC Symbol;Acc:VGNC:33074]	PMP22	0.654977	0.655066	5.96617	0.0662616	0.447017
ENSBTAG00000026394	618672	UBA like domain containing 1 [Source:VGNC Symbol;Acc:VGNC:36569]	UBALD1	0.868926	0.870631	2.60782	0.0663849	0.447395
ENSBTAG00000037452	790312	purine nucleoside phosphorylase [Source:NCBI gene (formerly Entrezgene);Acc:790312]	0	-0.669184	-0.669304	5.16492	0.0663864	0.447395
ENSBTAG00000020893	540041	matrilin 3 [Source:VGNC Symbol;Acc:VGNC:59347]	MATN3	0.809907	0.814301	1.21757	0.0664684	0.447717
ENSBTAG00000021535	281092	carnitine O-octanoyltransferase [Source:VGNC Symbol;Acc:VGNC:27723]	CROT	-0.698257	-0.698495	4.11737	0.0670211	0.451206
ENSBTAG00000020040	510842	lysophosphatidylcholine acyltransferase 4 [Source:VGNC Symbol;Acc:VGNC:30964]	LPCAT4	0.717934	0.718082	5.61432	0.0671185	0.451628
ENSBTAG00000018342	407100	tight junction protein 3 [Source:VGNC Symbol;Acc:VGNC:35883]	TJP3	-0.871306	-0.873487	1.34404	0.0671754	0.451778
ENSBTAG00000021686	520088	maternal embryonic leucine zipper kinase [Source:VGNC Symbol;Acc:VGNC:50031]	MELK	0.686322	0.686372	7.01895	0.0674844	0.453622
ENSBTAG00000011973	#N/A	DDB1 and CUL4 associated factor 16 [Source:VGNC Symbol;Acc:VGNC:27903]	DCAF16	-0.738763	-0.739667	2.42523	0.0677958	0.45548
ENSBTAG00000014143	516722	ankyrin repeat and SOCS box containing 5 [Source:VGNC Symbol;Acc:VGNC:26198]	ASB5	1.0028	1.01437	0.266501	0.0679934	0.456572
ENSBTAG00000004884	100297538	solute carrier family 4 member 5 [Source:VGNC Symbol;Acc:VGNC:34895]	SLC4A5	-1.03191	-1.04299	-0.622803	0.0681005	0.456917
ENSBTAG00000038831	540828	phytanoyl-CoA dioxygenase domain containing 1 [Source:NCBI gene (formerly Entrezgene);Acc:540828]	PHYHD1	-0.697905	-0.69819	3.97102	0.068115	0.456917
ENSBTAG00000017964	515066	leucine-rich repeat-containing protein 51 [Source:NCBI gene (formerly Entrezgene);Acc:515066]	LRRC51	-0.721645	-0.722709	2.20766	0.0684623	0.459011
ENSBTAG00000018088	617265	SET binding protein 1 [Source:VGNC Symbol;Acc:VGNC:34491]	SETBP1	-0.954277	-0.956843	0.948837	0.0684995	0.459024
ENSBTAG00000009046	526448	T-box transcription factor 6 [Source:VGNC Symbol;Acc:VGNC:35672]	TBX6	1.14105	1.1532	0.171492	0.0686838	0.460022
ENSBTAG00000018975	529468	potassium sodium-activated channel subfamily T member 1 [Source:VGNC Symbol;Acc:VGNC:30494]	KCNT1	0.863229	0.866458	1.25444	0.0687998	0.460357
ENSBTAG00000024643	100337421	ventricular zone expressed PH domain containing 1 [Source:VGNC Symbol;Acc:VGNC:36787]	VEPH1	-0.819205	-0.820313	1.9726	0.0688044	0.460357
ENSBTAG00000001280	520639	caseinolytic mitochondrial matrix peptidase chaperone subunit B [Source:VGNC Symbol;Acc:VGNC:27458]	CLPB	0.71279	0.713309	3.65728	0.068844	0.460386
ENSBTAG00000012322	616365	inka box actin regulator 1 [Source:VGNC Symbol;Acc:VGNC:28790]	INKA1	1.10929	1.12118	0.309592	0.0689963	0.461167
ENSBTAG00000053905	#N/A	0	0	0.886166	0.895704	0.730387	0.0690853	0.461525
ENSBTAG00000031010	526956	acyl-CoA dehydrogenase family member 11 [Source:VGNC Symbol;Acc:VGNC:25521]	ACAD11	-0.671041	-0.671157	5.19104	0.0693233	0.462746
ENSBTAG00000002738	540305	sphingosine-1-phosphate receptor 2 [Source:VGNC Symbol;Acc:VGNC:34253]	S1PR2	0.73022	0.730524	4.46382	0.0693391	0.462746
ENSBTAG00000025345	614282	ADP ribosylation factor like GTPase 10 [Source:VGNC Symbol;Acc:VGNC:26136]	ARL10	0.880338	0.883497	1.50564	0.0695827	0.464134
ENSBTAG00000016588	508215	post-glycosylphosphatidylinositol attachment to proteins 6 [Source:VGNC Symbol;Acc:VGNC:36123]	PGAP6	0.802491	0.803176	3.53641	0.0697485	0.465002
ENSBTAG00000022489	509283	E3 ubiquitin-protein ligase RNF213 [Source:NCBI gene (formerly Entrezgene);Acc:509283]	0	-0.712243	-0.712367	5.08051	0.070144	0.467328
ENSBTAG00000015126	100336382	TNFAIP3 interacting protein 2 [Source:VGNC Symbol;Acc:VGNC:54503]	TNIP2	1.00421	1.01233	0.531548	0.0702019	0.467328
ENSBTAG00000052494	#N/A	0	0	-0.808389	-0.811485	1.00446	0.0702213	0.467328
ENSBTAG00000007429	613889	sphingolipid transporter 2 [Source:NCBI gene (formerly Entrezgene);Acc:613889]	SPNS2	1.03575	1.04136	0.910893	0.0702764	0.467328
ENSBTAG00000020824	281888	keratin 10 [Source:VGNC Symbol;Acc:VGNC:30717]	KRT10	-0.711486	-0.712706	2.18827	0.0702767	0.467328
ENSBTAG00000014724	286819	eukaryotic translation initiation factor 4A2 [Source:VGNC Symbol;Acc:VGNC:28405]	EIF4A2	-0.68868	-0.688705	7.5232	0.0709491	0.471558
ENSBTAG00000020219	508577	MSS51 mitochondrial translational activator [Source:VGNC Symbol;Acc:VGNC:31707]	MSS51	-0.724589	-0.725388	2.54121	0.0710999	0.472319
ENSBTAG00000019577	281672	atypical chemokine receptor 4 [Source:VGNC Symbol;Acc:VGNC:25542]	ACKR4	-0.804431	-0.807982	0.299159	0.0712279	0.472928
ENSBTAG00000010411	512544	ADAM metallopeptidase with thrombospondin type 1 motif 8 [Source:VGNC Symbol;Acc:VGNC:25629]	ADAMTS8	0.968872	0.974219	0.871947	0.0713043	0.473195
ENSBTAG00000015728	533791	NOP2/Sun RNA methyltransferase 3 [Source:VGNC Symbol;Acc:VGNC:32286]	NSUN3	-0.696115	-0.696283	4.86686	0.0714287	0.473776
ENSBTAG00000015666	100296627	multidrug resistance protein 1 [Source:NCBI gene (formerly Entrezgene);Acc:100296627]	0	0.75281	0.754924	2.57621	0.0714647	0.473776
ENSBTAG00000044000	506240	DNA primase subunit 1 [Source:VGNC Symbol;Acc:VGNC:49067]	PRIM1	-0.724499	-0.725147	2.87618	0.0715877	0.474229
ENSBTAG00000047087	100301340	multiciliate differentiation and DNA synthesis associated cell cycle protein [Source:VGNC Symbol;Acc:VGNC:31306]	MCIDAS	0.816951	0.819913	1.75105	0.0716058	0.474229
ENSBTAG00000012592	537502	ankyrin repeat and LEM domain containing 1 [Source:VGNC Symbol;Acc:VGNC:25903]	ANKLE1	0.730604	0.731266	3.40555	0.0717229	0.474763
ENSBTAG00000006578	512410	sperm flagellar 1 [Source:VGNC Symbol;Acc:VGNC:35201]	SPEF1	0.830718	0.836444	0.932113	0.0719643	0.476119
ENSBTAG00000054505	#N/A	0	0	0.768546	0.772309	1.10412	0.072649	0.480254
ENSBTAG00000038706	768319	metallothionein 1E [Source:NCBI gene (formerly Entrezgene);Acc:768319]	MT1E	0.942035	0.960024	-0.282062	0.072663	0.480254
ENSBTAG00000004263	518974	ATPase H+ transporting V0 subunit a4 [Source:VGNC Symbol;Acc:VGNC:26309]	ATP6V0A4	0.858556	0.864974	1.01158	0.0727135	0.480344
ENSBTAG00000020535	282846	PYD and CARD domain containing [Source:NCBI gene (formerly Entrezgene);Acc:282846]	PYCARD	0.858731	0.859793	2.98351	0.0729158	0.481437
ENSBTAG00000000933	618673	coiled-coil domain containing 183 [Source:VGNC Symbol;Acc:VGNC:26878]	CCDC183	0.827645	0.835619	-0.22348	0.072979	0.48161
ENSBTAG00000006643	511424	chromosome 6 C4orf19 homolog [Source:VGNC Symbol;Acc:VGNC:52724]	C6H4orf19	-0.861118	-0.872107	-0.766981	0.0731503	0.482496
ENSBTAG00000015793	533332	RAB38, member RAS oncogene family [Source:VGNC Symbol;Acc:VGNC:33646]	RAB38	-0.748944	-0.749491	2.99604	0.0733261	0.48341
ENSBTAG00000016017	529788	coiled-coil domain containing 40 [Source:VGNC Symbol;Acc:VGNC:26895]	CCDC40	0.782051	0.786046	1.15991	0.0735513	0.484478
ENSBTAG00000003202	781956	opioid receptor delta 1 [Source:VGNC Symbol;Acc:VGNC:50539]	OPRD1	0.866872	0.872932	0.787588	0.0735625	0.484478
ENSBTAG00000001324	282468	solute carrier organic anion transporter family member 2A1 [Source:VGNC Symbol;Acc:VGNC:34951]	SLCO2A1	-0.76554	-0.766289	2.38406	0.0737585	0.485524
ENSBTAG00000022931	#N/A	0	0	-0.834756	-0.838428	0.36058	0.0740809	0.4874
ENSBTAG00000012302	539358	reticulon 4 receptor like 1 [Source:VGNC Symbol;Acc:VGNC:34207]	RTN4RL1	-0.82483	-0.82916	0.328022	0.0741261	0.487451
ENSBTAG00000010635	282029	RAB3A, member RAS oncogene family [Source:VGNC Symbol;Acc:VGNC:33649]	RAB3A	0.746719	0.748837	1.64459	0.0741907	0.48763
ENSBTAG00000007353	516030	distal-less homeobox 4 [Source:VGNC Symbol;Acc:VGNC:28100]	DLX4	0.692985	0.6936	3.51149	0.074314	0.488194
ENSBTAG00000005718	280981	perilipin 2 [Source:VGNC Symbol;Acc:VGNC:33030]	PLIN2	0.711885	0.712239	4.65436	0.0745696	0.489626
ENSBTAG00000001662	510183	EH domain containing 3 [Source:VGNC Symbol;Acc:VGNC:28373]	EHD3	0.678509	0.678678	4.96908	0.0747095	0.490298
ENSBTAG00000013664	504954	filamin A interacting protein 1 like [Source:VGNC Symbol;Acc:VGNC:29013]	FILIP1L	0.663969	0.663994	7.57819	0.074884	0.491047
ENSBTAG00000011543	613842	programmed cell death 1 [Source:VGNC Symbol;Acc:VGNC:32657]	PDCD1	1.06763	1.07355	1.05353	0.0748994	0.491047
ENSBTAG00000019891	101907103	mitochondrial ribosomal protein L40 [Source:VGNC Symbol;Acc:VGNC:31636]	MRPL40	0.692869	0.693289	4.15759	0.0749368	0.491047
ENSBTAG00000046924	100299041	semaphorin 3G [Source:VGNC Symbol;Acc:VGNC:34432]	SEMA3G	0.763546	0.764654	2.68666	0.0750619	0.491618
ENSBTAG00000010882	532402	ankyrin repeat domain 9 [Source:VGNC Symbol;Acc:VGNC:25943]	ANKRD9	0.82055	0.825567	1.20966	0.0750994	0.491618
ENSBTAG00000034626	768246	F-box protein 16 [Source:VGNC Symbol;Acc:VGNC:28894]	FBXO16	-0.721779	-0.722773	2.23017	0.0752541	0.492162
ENSBTAG00000021100	513859	protein phosphatase 1 regulatory subunit 3F [Source:VGNC Symbol;Acc:VGNC:33247]	PPP1R3F	0.81373	0.818539	1.1638	0.0752698	0.492162
ENSBTAG00000051104	507586	cell growth regulator with EF-hand domain 1 [Source:NCBI gene (formerly Entrezgene);Acc:507586]	CGREF1	0.946204	0.96421	-0.326065	0.0752959	0.492162
ENSBTAG00000050060	523303	natural killer cell cytotoxicity receptor 3 ligand 1 [Source:NCBI gene (formerly Entrezgene);Acc:523303]	NCR3LG1	0.714562	0.714845	4.71812	0.0760159	0.496619
ENSBTAG00000007214	782605	elongation factor for RNA polymerase II 2 [Source:VGNC Symbol;Acc:VGNC:28436]	ELL2	0.671464	0.671541	6.66822	0.0760844	0.496711
ENSBTAG00000005408	613808	CDC like kinase 1 [Source:VGNC Symbol;Acc:VGNC:27448]	CLK1	-0.73694	-0.736972	7.43539	0.0761062	0.496711
ENSBTAG00000021844	504316	cochlin [Source:VGNC Symbol;Acc:VGNC:27545]	COCH	1.41336	1.45459	-0.401353	0.0761561	0.496734
ENSBTAG00000008575	517509	cingulin like 1 [Source:VGNC Symbol;Acc:VGNC:27259]	CGNL1	-0.689709	-0.689849	4.55577	0.0761859	0.496734
ENSBTAG00000000317	524806	mitogen-activated protein kinase 8 interacting protein 1 [Source:VGNC Symbol;Acc:VGNC:31224]	MAPK8IP1	0.742189	0.742773	3.69833	0.076291	0.49717
[truncated: 11,028 more rows]

## Sheet: AFB1 1.8 µM vs CTRL
ENSEMBL	ENTREZID	Gene description	Gene name	logFC	unshrunk.logFC	logCPM	PValue	FDR
ENSBTAG00000018189	514170	cystatin B (stefin B) [Source:NCBI gene (formerly Entrezgene);Acc:514170]	CSTB	3.38051	3.38169	5.98737	9.33e-17	1.22e-12
ENSBTAG00000011644	540939	Bos taurus thrombospondin type 1 domain containing 4 (THSD4), mRNA. [Source:RefSeq mRNA;Acc:NM_001078030]	THSD4	-5.57173	-5.58347	3.58345	3.63e-16	1.58e-12
ENSBTAG00000040490	509875	coiled-coil domain containing 3 [Source:NCBI gene (formerly Entrezgene);Acc:509875]	CCDC3	-2.14835	-2.1485	6.74687	4.5e-14	4.51e-11
ENSBTAG00000002974	504401	flavin containing dimethylaniline monoxygenase 2 [Source:VGNC Symbol;Acc:VGNC:29050]	FMO2	-5.06562	-5.07316	3.73085	3.41e-16	1.58e-12
ENSBTAG00000054218	404185	insulin like growth factor binding protein 5 [Source:NCBI gene (formerly Entrezgene);Acc:404185]	IGFBP5	-5.35164	-5.37305	2.47721	4.97e-15	1.23e-11
ENSBTAG00000031669	527492	catenin alpha 2 [Source:NCBI gene (formerly Entrezgene);Acc:527492]	CTNNA2	-4.81016	-4.82753	2.2337	3.52e-14	4.51e-11
ENSBTAG00000007732	618648	cAMP regulated phosphoprotein 21 [Source:VGNC Symbol;Acc:VGNC:58588]	ARPP21	3.65106	3.65539	4.58472	1.45e-14	2.7e-11
ENSBTAG00000011734	510376	ankyrin repeat domain 1 [Source:VGNC Symbol;Acc:VGNC:25908]	ANKRD1	2.97577	2.97587	9.27907	6.76e-14	5.51e-11
ENSBTAG00000006367	281103	cellular communication network factor 2 [Source:VGNC Symbol;Acc:VGNC:27794]	CCN2	2.77474	2.77482	9.11781	1.44e-13	8.62e-11
ENSBTAG00000001764	523701	neurocan [Source:VGNC Symbol;Acc:VGNC:31900]	NCAN	4.74523	4.76385	3.76305	2.4e-13	1.2e-10
ENSBTAG00000020829	509657	protein tyrosine phosphatase receptor type K [Source:VGNC Symbol;Acc:VGNC:33552]	PTPRK	-3.45098	-3.45205	5.11182	7.41e-16	2.41e-12
ENSBTAG00000004587	515310	dual specificity phosphatase 6 [Source:VGNC Symbol;Acc:VGNC:28262]	DUSP6	2.93308	2.93381	6.337	7.24e-14	5.55e-11
ENSBTAG00000000585	505805	lymphocyte antigen 6 family member G6C [Source:VGNC Symbol;Acc:VGNC:31090]	LY6G6C	3.97511	3.97967	4.92959	1.07e-13	7.35e-11
ENSBTAG00000006194	531389	FOS like 1, AP-1 transcription factor subunit [Source:VGNC Symbol;Acc:VGNC:29075]	FOSL1	4.00318	4.00645	5.52878	2.46e-14	3.56e-11
ENSBTAG00000021435	617914	MAF bZIP transcription factor F [Source:VGNC Symbol;Acc:VGNC:31140]	MAFF	2.91068	2.91185	5.7848	5.65e-15	1.23e-11
ENSBTAG00000009844	508941	cellular communication network factor 1 [Source:VGNC Symbol;Acc:VGNC:50270]	CCN1	2.50537	2.50544	9.27463	7.57e-13	3.08e-10
ENSBTAG00000010462	534842	roundabout guidance receptor 2 [Source:VGNC Symbol;Acc:VGNC:34079]	ROBO2	-3.74523	-3.74767	4.14977	5.66e-14	5.27e-11
ENSBTAG00000005800	529618	glutamate ionotropic receptor AMPA type subunit 1 [Source:VGNC Symbol;Acc:VGNC:29638]	GRIA1	-3.59169	-3.59497	3.55946	4.69e-13	1.97e-10
ENSBTAG00000002006	281530	thrombospondin 1 [Source:VGNC Symbol;Acc:VGNC:35828]	THBS1	3.14752	3.14758	10.2777	9.01e-14	6.52e-11
ENSBTAG00000002127	541012	t-complex 11 like 2 [Source:VGNC Symbol;Acc:VGNC:35704]	TCP11L2	-2.89495	-2.89883	2.68204	1.43e-12	4.78e-10
ENSBTAG00000021971	540156	synuclein alpha interacting protein [Source:VGNC Symbol;Acc:VGNC:35060]	SNCAIP	-4.31415	-4.33558	1.52719	1.69e-13	8.79e-11
ENSBTAG00000008333	533129	ETS variant transcription factor 4 [Source:VGNC Symbol;Acc:VGNC:28630]	ETV4	4.1697	4.17832	4.3078	1.29e-12	4.73e-10
ENSBTAG00000019866	539369	neuropilin 1 [Source:VGNC Symbol;Acc:VGNC:32266]	NRP1	2.38004	2.38055	5.98535	1.58e-13	8.67e-11
ENSBTAG00000011578	281057	CD44 molecule [Source:VGNC Symbol;Acc:VGNC:54629]	CD44	1.92098	1.921	9.96832	2.42e-12	7.33e-10
ENSBTAG00000018347	507054	interleukin 33 [Source:VGNC Symbol;Acc:VGNC:30155]	IL33	-3.84329	-3.8516	2.37727	3.22e-12	8.74e-10
ENSBTAG00000039340	538100	sodium voltage-gated channel beta subunit 4 [Source:VGNC Symbol;Acc:VGNC:34351]	SCN4B	-3.21064	-3.21399	3.19287	1.07e-11	2.45e-09
ENSBTAG00000001231	281996	cadherin related family member 1 [Source:VGNC Symbol;Acc:VGNC:27108]	CDHR1	6.16251	6.22083	3.54011	4.21e-14	4.51e-11
ENSBTAG00000013369	781493	collagen type XIV alpha 1 chain [Source:VGNC Symbol;Acc:VGNC:53851]	COL14A1	-2.20161	-2.20166	8.36377	1.89e-14	3.07e-11
ENSBTAG00000016819	281758	fatty acid binding protein 3 [Source:VGNC Symbol;Acc:VGNC:28697]	FABP3	3.12663	3.12765	5.98383	1.6e-13	8.67e-11
ENSBTAG00000014112	537690	exocyst complex component 4 [Source:VGNC Symbol;Acc:VGNC:28648]	EXOC4	-2.51212	-2.51276	4.96783	3.93e-14	4.51e-11
ENSBTAG00000013165	532663	ectonucleotide pyrophosphatase/phosphodiesterase 2 [Source:VGNC Symbol;Acc:VGNC:28505]	ENPP2	-3.01773	-3.01986	3.71389	3.4e-13	1.59e-10
ENSBTAG00000024081	533916	extracellular matrix protein 2 [Source:VGNC Symbol;Acc:VGNC:28312]	ECM2	-2.29433	-2.29462	5.90227	4.04e-13	1.81e-10
ENSBTAG00000013525	617577	megakaryocyte and platelet inhibitory receptor G6b [Source:VGNC Symbol;Acc:VGNC:31577]	MPIG6B	2.45234	2.4548	4.15069	1.85e-12	5.88e-10
ENSBTAG00000007241	507627	SLAM family member 9 [Source:VGNC Symbol;Acc:VGNC:34657]	SLAMF9	3.5758	3.58239	3.65639	1.05e-10	1.24e-08
ENSBTAG00000031178	535743	solute carrier family 9 member A9 [Source:VGNC Symbol;Acc:VGNC:34947]	SLC9A9	-5.40019	-5.47586	0.680976	1.44e-10	1.6e-08
ENSBTAG00000013760	523526	collagen type IV alpha 6 chain [Source:VGNC Symbol;Acc:VGNC:27567]	COL4A6	-2.82958	-2.82989	6.31612	1.16e-13	7.59e-11
ENSBTAG00000024269	784894	transforming growth factor beta receptor 3 [Source:VGNC Symbol;Acc:VGNC:49979]	TGFBR3	-2.31549	-2.31589	5.49086	3.42e-13	1.59e-10
ENSBTAG00000005236	281665	cholecystokinin B receptor [Source:VGNC Symbol;Acc:VGNC:26942]	CCKBR	5.41814	5.47076	3.03046	1.71e-11	3.32e-09
ENSBTAG00000053833	#N/A	0	0	-3.43074	-3.43781	2.27827	3.76e-12	9.8e-10
ENSBTAG00000039425	614456	keratin 6A [Source:NCBI gene (formerly Entrezgene);Acc:614456]	KRT6A	4.94528	4.95326	5.17456	1.29e-12	4.73e-10
ENSBTAG00000044033	538062	EGF like repeats and discoidin domains 3 [Source:VGNC Symbol;Acc:VGNC:28326]	EDIL3	-3.31281	-3.31515	3.79793	1.55e-12	5.06e-10
ENSBTAG00000051466	100336480	unc-51 like kinase 4 [Source:NCBI gene (formerly Entrezgene);Acc:100336480]	ULK4	-2.3189	-2.32132	2.84402	9.72e-12	2.27e-09
ENSBTAG00000010178	532751	protein tyrosine phosphatase receptor type D [Source:VGNC Symbol;Acc:VGNC:33548]	PTPRD	-3.19972	-3.20652	2.11483	2.18e-11	4.18e-09
ENSBTAG00000013918	282651	adhesion G protein-coupled receptor L3 [Source:VGNC Symbol;Acc:VGNC:53686]	ADGRL3	-3.25166	-3.26166	1.56901	7.1e-11	9.39e-09
ENSBTAG00000048246	281122	dipeptidyl peptidase 4 [Source:NCBI gene (formerly Entrezgene);Acc:281122]	DPP4	-4.88166	-4.93554	0.693121	3.23e-10	3.01e-08
ENSBTAG00000026181	286792	UDP glucuronosyltransferase 1 family, polypeptide A6 [Source:NCBI gene (formerly Entrezgene);Acc:286792]	UGT1A1	-6.07012	-6.41688	-0.566601	1.67e-10	1.79e-08
ENSBTAG00000004398	101902373	inner mitochondrial membrane peptidase subunit 2 [Source:VGNC Symbol;Acc:VGNC:57350]	IMMP2L	-2.77675	-2.78041	2.7284	4.39e-13	1.9e-10
ENSBTAG00000010661	509796	dihydropyrimidinase like 3 [Source:VGNC Symbol;Acc:VGNC:28196]	DPYSL3	1.8248	1.82487	8.33263	2.32e-11	4.32e-09
ENSBTAG00000000559	505640	phospholipid transfer protein [Source:VGNC Symbol;Acc:VGNC:33055]	PLTP	4.24114	4.24169	8.2345	2.45e-10	2.4e-08
ENSBTAG00000001132	534677	glycosyltransferase like domain containing 1 [Source:VGNC Symbol;Acc:VGNC:29690]	GTDC1	-3.4778	-3.48381	2.55675	9.76e-12	2.27e-09
ENSBTAG00000019612	616089	ribonuclease A family member 4 [Source:VGNC Symbol;Acc:VGNC:33998]	RNASE4	-2.30263	-2.30303	5.46618	2.77e-12	8.02e-10
ENSBTAG00000019722	282244	guanylate cyclase 2C [Source:VGNC Symbol;Acc:VGNC:29722]	GUCY2C	-2.5453	-2.54715	3.48251	1.46e-13	8.62e-11
ENSBTAG00000008103	281615	aldehyde dehydrogenase 1 family member A1 [Source:VGNC Symbol;Acc:VGNC:25808]	ALDH1A1	-2.50763	-2.50913	3.69356	5.96e-11	8.42e-09
ENSBTAG00000051780	100297737	ribonuclease A family member 12 (inactive) [Source:NCBI gene (formerly Entrezgene);Acc:100297737]	RNASE12	-5.34264	-5.42639	0.65321	1.31e-12	4.73e-10
ENSBTAG00000011962	527631	phospholipase A2 group III [Source:VGNC Symbol;Acc:VGNC:32959]	PLA2G3	3.15661	3.16566	2.94464	3.46e-11	5.5e-09
ENSBTAG00000051298	526865	PVR cell adhesion molecule [Source:NCBI gene (formerly Entrezgene);Acc:526865]	PVR	2.18536	2.18549	8.01211	4.2e-11	6.21e-09
ENSBTAG00000013779	540050	heat shock protein family A (Hsp70) member 12A [Source:VGNC Symbol;Acc:VGNC:55956]	HSPA12A	1.49611	1.49636	6.05376	3.77e-11	5.71e-09
ENSBTAG00000031358	281124	dihydropyrimidine dehydrogenase [Source:VGNC Symbol;Acc:VGNC:28193]	DPYD	-3.86927	-3.88137	1.87271	1.37e-10	1.58e-08
ENSBTAG00000054574	518080	multidrug resistance-associated protein 1 [Source:NCBI gene (formerly Entrezgene);Acc:518080]	0	4.94461	4.96778	3.53312	2.69e-11	4.72e-09
ENSBTAG00000023179	521857	tribbles pseudokinase 1 [Source:VGNC Symbol;Acc:VGNC:36308]	TRIB1	2.78964	2.7903	6.28134	2.46e-11	4.52e-09
ENSBTAG00000007104	781073	junctophilin 4 [Source:VGNC Symbol;Acc:VGNC:30383]	JPH4	-2.90647	-2.91657	1.407	9.83e-11	1.19e-08
ENSBTAG00000006528	535387	Bardet-Biedl syndrome 9 [Source:NCBI gene (formerly Entrezgene);Acc:535387]	BBS9	-2.8146	-2.82086	1.87622	6.88e-11	9.33e-09
ENSBTAG00000012312	783965	receptor tyrosine kinase like orphan receptor 1 [Source:VGNC Symbol;Acc:VGNC:55673]	ROR1	-2.62393	-2.62495	4.36385	1.52e-11	3.19e-09
ENSBTAG00000008951	280994	alkaline phosphatase, biomineralization associated [Source:VGNC Symbol;Acc:VGNC:25850]	ALPL	4.44262	4.45695	3.47073	1.85e-10	1.91e-08
ENSBTAG00000015692	506096	heat shock protein family A (Hsp70) member 4 like [Source:VGNC Symbol;Acc:VGNC:53906]	HSPA4L	2.02373	2.02416	5.92682	2.65e-12	7.85e-10
ENSBTAG00000013147	528842	neurofilament heavy [Source:VGNC Symbol;Acc:VGNC:31985]	NEFH	3.67362	3.67902	4.38906	2.86e-12	8.09e-10
ENSBTAG00000001537	529661	tsukushi, small leucine rich proteoglycan [Source:VGNC Symbol;Acc:VGNC:54896]	TSKU	2.53998	2.54133	4.96857	9.33e-11	1.14e-08
ENSBTAG00000010293	535378	par-3 family cell polarity regulator beta [Source:NCBI gene (formerly Entrezgene);Acc:535378]	PARD3B	-3.34735	-3.35226	2.78383	3.57e-12	9.49e-10
ENSBTAG00000047416	510736	hephaestin [Source:VGNC Symbol;Acc:VGNC:29812]	HEPH	-1.75553	-1.75598	4.75587	1.38e-12	4.74e-10
ENSBTAG00000003977	507459	solute carrier family 52 member 3 [Source:VGNC Symbol;Acc:VGNC:34902]	SLC52A3	-5.70345	-5.79785	0.760861	4.18e-11	6.21e-09
ENSBTAG00000016229	539139	Kruppel like factor 9 [Source:VGNC Symbol;Acc:VGNC:30632]	KLF9	-1.88381	-1.88465	4.03309	1.47e-11	3.15e-09
ENSBTAG00000003894	515033	NDRG family member 4 [Source:VGNC Symbol;Acc:VGNC:31941]	NDRG4	3.25162	3.27013	2.14498	9.1e-11	1.13e-08
ENSBTAG00000000310	281908	microfibril associated protein 5 [Source:VGNC Symbol;Acc:VGNC:31425]	MFAP5	3.66901	3.69109	2.15786	3.69e-11	5.66e-09
ENSBTAG00000012737	788507	G protein-coupled receptor 65 [Source:VGNC Symbol;Acc:VGNC:29596]	GPR65	3.04833	3.056	2.96828	2.23e-11	4.21e-09
ENSBTAG00000006870	514877	RasGEF domain family member 1A [Source:VGNC Symbol;Acc:VGNC:33743]	RASGEF1A	4.8893	4.92767	2.67247	4.16e-10	3.59e-08
ENSBTAG00000010726	100271720	coagulation factor VIII [Source:VGNC Symbol;Acc:VGNC:28690]	F8	-2.72075	-2.72295	3.39307	7.29e-12	1.79e-09
ENSBTAG00000021717	538896	bradykinin receptor B2 [Source:VGNC Symbol;Acc:VGNC:26460]	BDKRB2	1.65037	1.65075	5.70704	3.42e-10	3.12e-08
ENSBTAG00000048655	281363	5'-nucleotidase ecto [Source:NCBI gene (formerly Entrezgene);Acc:281363]	NT5E	-3.50711	-3.50853	4.75979	8.61e-13	3.4e-10
ENSBTAG00000026371	518366	sorting nexin 29 [Source:VGNC Symbol;Acc:VGNC:35106]	SNX29	-2.82798	-2.83097	3.04539	3.11e-12	8.61e-10
ENSBTAG00000008134	617701	brain derived neurotrophic factor [Source:VGNC Symbol;Acc:VGNC:26461]	BDNF	2.0993	2.10291	3.1188	3.32e-10	3.07e-08
ENSBTAG00000005738	541187	ATPase phospholipid transporting 8B1 [Source:VGNC Symbol;Acc:VGNC:26330]	ATP8B1	1.24104	1.24121	6.13038	6.12e-10	4.98e-08
ENSBTAG00000030581	614554	TBC1 domain family member 5 [Source:VGNC Symbol;Acc:VGNC:53608]	TBC1D5	-2.34492	-2.34604	4.05778	6.57e-14	5.51e-11
ENSBTAG00000005667	#N/A	0	0	3.62658	3.68102	0.89133	1.24e-08	5.38e-07
ENSBTAG00000021739	508734	natriuretic peptide B [Source:VGNC Symbol;Acc:VGNC:32211]	NPPB	4.39199	4.43555	2.16839	2.22e-09	1.38e-07
ENSBTAG00000021132	101905578	synaptopodin 2 like [Source:VGNC Symbol;Acc:VGNC:54495]	SYNPO2L	2.61649	2.62272	2.82397	2.78e-10	2.62e-08
ENSBTAG00000000987	506301	otogelin [Source:VGNC Symbol;Acc:VGNC:32485]	OTOG	2.8471	2.85366	3.17823	1.03e-07	3.06e-06
ENSBTAG00000011207	534583	calponin 1 [Source:VGNC Symbol;Acc:VGNC:27508]	CNN1	2.09124	2.09148	6.90059	1.94e-08	7.76e-07
ENSBTAG00000034885	614348	regulator of cell cycle [Source:VGNC Symbol;Acc:VGNC:33902]	RGCC	2.73267	2.73863	3.02014	1.42e-10	1.6e-08
ENSBTAG00000023730	768070	tubulin beta 3 class III [Source:NCBI gene (formerly Entrezgene);Acc:768070]	TUBB3	2.82503	2.82978	3.61551	3.74e-09	2.03e-07
ENSBTAG00000008096	281137	endothelin 1 [Source:VGNC Symbol;Acc:VGNC:28327]	EDN1	1.82387	1.82437	5.44093	1.62e-10	1.76e-08
ENSBTAG00000006273	618738	sulfotransferase family 4A member 1 [Source:VGNC Symbol;Acc:VGNC:35469]	SULT4A1	1.56716	1.56917	3.21352	7.89e-08	2.48e-06
ENSBTAG00000016729	781505	potassium sodium-activated channel subfamily T member 2 [Source:VGNC Symbol;Acc:VGNC:30495]	KCNT2	-3.07922	-3.08726	1.82348	1.39e-11	3.03e-09
ENSBTAG00000016800	518458	semaphorin 6D [Source:VGNC Symbol;Acc:VGNC:34444]	SEMA6D	-4.66471	-4.73919	0.126959	3.98e-10	3.48e-08
ENSBTAG00000011154	529759	syndecan 1 [Source:VGNC Symbol;Acc:VGNC:34378]	SDC1	1.40354	1.40368	6.78715	2.51e-09	1.5e-07
ENSBTAG00000009851	536815	roundabout guidance receptor 1 [Source:VGNC Symbol;Acc:VGNC:34078]	ROBO1	-2.18986	-2.19044	4.80147	7.46e-11	9.62e-09
ENSBTAG00000019093	505049	amylase, alpha 2B (pancreatic) [Source:NCBI gene (formerly Entrezgene);Acc:505049]	AMY2B	-3.50316	-3.51565	1.58882	7.26e-11	9.46e-09
ENSBTAG00000022360	533829	SRY-box transcription factor 5 [Source:VGNC Symbol;Acc:VGNC:35149]	SOX5	-3.01126	-3.01667	2.30086	5.97e-11	8.42e-09
ENSBTAG00000017571	532887	pleckstrin homology domain containing A5 [Source:VGNC Symbol;Acc:VGNC:33007]	PLEKHA5	-1.80543	-1.8064	3.71019	4.65e-10	3.91e-08
ENSBTAG00000016206	281293	monoamine oxidase A [Source:VGNC Symbol;Acc:VGNC:31174]	MAOA	-1.70867	-1.70884	6.12948	1.7e-11	3.32e-09
ENSBTAG00000020636	#N/A	synapsin III [Source:VGNC Symbol;Acc:VGNC:35516]	SYN3	-4.8202	-4.89506	0.190812	2.97e-09	1.7e-07
ENSBTAG00000002626	100140016	Rho GTPase activating protein 6 [Source:VGNC Symbol;Acc:VGNC:26099]	ARHGAP6	-2.90925	-2.93133	0.24412	3.6e-10	3.25e-08
ENSBTAG00000030974	777775	tubulin alpha 4a [Source:VGNC Symbol;Acc:VGNC:49986]	TUBA4A	1.41175	1.41203	5.79975	8.04e-08	2.49e-06
ENSBTAG00000008688	538609	hes related family bHLH transcription factor with YRPW motif like [Source:VGNC Symbol;Acc:VGNC:29830]	HEYL	1.95099	1.95251	4.07022	7.55e-09	3.53e-07
ENSBTAG00000017877	507718	nectin cell adhesion molecule 4 [Source:VGNC Symbol;Acc:VGNC:55633]	NECTIN4	2.7892	2.79036	5.39101	3.75e-09	2.03e-07
ENSBTAG00000012082	617439	TNF receptor superfamily member 12A [Source:VGNC Symbol;Acc:VGNC:36162]	TNFRSF12A	2.26539	2.26587	6.19347	6.71e-10	5.23e-08
ENSBTAG00000049215	781091	shisa family member 3 [Source:NCBI gene (formerly Entrezgene);Acc:781091]	SHISA3	5.4194	5.60361	1.19776	2.63e-11	4.72e-09
ENSBTAG00000048508	281867	inhibin subunit beta A [Source:NCBI gene (formerly Entrezgene);Acc:281867]	INHBA	2.26817	2.26919	5.06521	8.96e-10	6.63e-08
ENSBTAG00000038549	509506	phylloquinone omega-hydroxylase CYP4F2 [Source:NCBI gene (formerly Entrezgene);Acc:509506]	0	4.37193	4.41239	2.00582	3.04e-09	1.72e-07
ENSBTAG00000033180	616050	SET and MYND domain containing 3 [Source:VGNC Symbol;Acc:VGNC:35044]	SMYD3	-2.33445	-2.34168	1.29457	3.88e-09	2.07e-07
ENSBTAG00000020148	280939	TEK receptor tyrosine kinase [Source:VGNC Symbol;Acc:VGNC:35735]	TEK	-3.38641	-3.40102	1.18073	1.16e-09	8.02e-08
ENSBTAG00000045877	100125309	TSC22 domain family member 3 [Source:NCBI gene (formerly Entrezgene);Acc:100125309]	TSC22D3	-1.23936	-1.23942	7.09851	2.03e-09	1.28e-07
ENSBTAG00000032887	618133	SPT3 homolog, SAGA and STAGA complex component [Source:VGNC Symbol;Acc:VGNC:35479]	SUPT3H	-2.07937	-2.08145	2.89325	1.35e-11	2.98e-09
ENSBTAG00000014821	504220	solute carrier family 7 member 7 [Source:VGNC Symbol;Acc:VGNC:34932]	SLC7A7	-3.32764	-3.33075	3.4339	6.48e-11	8.98e-09
ENSBTAG00000007196	513463	transgelin [Source:VGNC Symbol;Acc:VGNC:35585]	TAGLN	2.17581	2.17585	9.60098	9.19e-09	4.16e-07
ENSBTAG00000018520	529590	sodium voltage-gated channel alpha subunit 1 [Source:VGNC Symbol;Acc:VGNC:34345]	SCN1A	-3.01901	-3.02229	3.09499	7.14e-12	1.79e-09
ENSBTAG00000002940	538627	Wnt family member 16 [Source:VGNC Symbol;Acc:VGNC:36956]	WNT16	-3.23495	-3.23651	4.34275	2.69e-11	4.72e-09
ENSBTAG00000020060	506790	thioredoxin interacting protein [Source:VGNC Symbol;Acc:VGNC:36541]	TXNIP	-1.18427	-1.1843	8.45472	4.03e-08	1.41e-06
ENSBTAG00000045757	509486	troponin C1, slow skeletal and cardiac type [Source:VGNC Symbol;Acc:VGNC:36189]	TNNC1	1.83489	1.83565	4.77218	1.06e-09	7.55e-08
ENSBTAG00000014915	541166	ETS variant transcription factor 5 [Source:VGNC Symbol;Acc:VGNC:28631]	ETV5	1.60946	1.60982	5.63518	2.12e-08	8.29e-07
ENSBTAG00000023177	280816	complement factor H [Source:NCBI gene (formerly Entrezgene);Acc:280816]	CFH	-4.49472	-4.49857	4.14241	2.02e-09	1.28e-07
ENSBTAG00000023843	616166	Ral GEF with PH domain and SH3 binding motif 1 [Source:VGNC Symbol;Acc:VGNC:33704]	RALGPS1	-2.51133	-2.5147	2.57172	7.58e-11	9.67e-09
ENSBTAG00000008008	281534	toll like receptor 2 [Source:VGNC Symbol;Acc:VGNC:49982]	TLR2	2.63895	2.64097	4.61355	2.79e-11	4.78e-09
ENSBTAG00000008779	286820	arachidonate 15-lipoxygenase type B [Source:VGNC Symbol;Acc:VGNC:55769]	ALOX15B	7.08994	7.27698	2.8958	9.71e-10	6.99e-08
ENSBTAG00000050763	537248	2-phosphoxylose phosphatase 1 [Source:VGNC Symbol;Acc:VGNC:52811]	PXYLP1	-1.65801	-1.65847	4.64128	1.7e-11	3.32e-09
ENSBTAG00000016732	534479	dynein axonemal intermediate chain 2 [Source:VGNC Symbol;Acc:VGNC:28130]	DNAI2	4.28068	4.36023	1.16927	7.26e-09	3.4e-07
ENSBTAG00000018773	508869	Rho family GTPase 1 [Source:VGNC Symbol;Acc:VGNC:34004]	RND1	1.73542	1.73704	3.85695	9.43e-10	6.86e-08
ENSBTAG00000020374	541228	thrombospondin type 1 domain containing 1 [Source:VGNC Symbol;Acc:VGNC:35849]	THSD1	1.8355	1.83601	5.54882	6e-10	4.92e-08
ENSBTAG00000008550	100125415	GTPase, IMAP family member 7 [Source:NCBI gene (formerly Entrezgene);Acc:100125415]	GIMAP7	1.9086	1.90993	4.0074	1.71e-09	1.12e-07
ENSBTAG00000000925	523294	glycosyltransferase 8 domain containing 2 [Source:VGNC Symbol;Acc:VGNC:29424]	GLT8D2	-4.56985	-4.62327	0.539867	1.33e-10	1.55e-08
ENSBTAG00000054330	281555	tubulin, beta 2B class IIb [Source:NCBI gene (formerly Entrezgene);Acc:281555]	TUBB2B	1.9047	1.90557	4.90436	1.75e-07	4.69e-06
ENSBTAG00000032148	614719	transmembrane protein 117 [Source:VGNC Symbol;Acc:VGNC:35954]	TMEM117	-3.24091	-3.25379	1.23149	2.31e-09	1.43e-07
ENSBTAG00000000793	511043	laminin subunit gamma 2 [Source:VGNC Symbol;Acc:VGNC:30774]	LAMC2	1.43118	1.43178	4.82911	2.27e-08	8.74e-07
ENSBTAG00000015794	522383	nestin [Source:VGNC Symbol;Acc:VGNC:32009]	NES	1.22794	1.22802	7.30741	3.88e-08	1.39e-06
ENSBTAG00000004557	282851	dehydrogenase/reductase 9 [Source:VGNC Symbol;Acc:VGNC:28046]	DHRS9	2.87393	2.87485	5.82865	4.12e-12	1.05e-09
ENSBTAG00000008105	533516	RNA binding motif protein 38 [Source:VGNC Symbol;Acc:VGNC:33798]	RBM38	2.43298	2.43863	2.98725	6.5e-10	5.13e-08
ENSBTAG00000000983	538996	ATP binding cassette subfamily C member 8 [Source:VGNC Symbol;Acc:VGNC:25475]	ABCC8	-5.25784	-5.4955	-0.816947	5.52e-08	1.84e-06
ENSBTAG00000014538	531339	hippocalcin like 4 [Source:VGNC Symbol;Acc:VGNC:29938]	HPCAL4	2.03758	2.04135	2.74118	6.14e-08	2.01e-06
ENSBTAG00000016455	536020	cache domain containing 1 [Source:VGNC Symbol;Acc:VGNC:26671]	CACHD1	-1.69563	-1.69585	5.81593	1.13e-11	2.53e-09
ENSBTAG00000003601	504576	zinc finger matrin-type 1 [Source:VGNC Symbol;Acc:VGNC:37190]	ZMAT1	-4.55927	-4.60922	0.543826	1.73e-09	1.12e-07
ENSBTAG00000021483	531068	olfactomedin like 1 [Source:VGNC Symbol;Acc:VGNC:32421]	OLFML1	-6.68626	-6.83587	1.08783	6.35e-10	5.11e-08
ENSBTAG00000000140	535293	epoxide hydrolase 1 [Source:VGNC Symbol;Acc:VGNC:28541]	EPHX1	-2.30688	-2.30771	4.50094	1.36e-12	4.74e-10
ENSBTAG00000017223	404180	mesoderm specific transcript [Source:VGNC Symbol;Acc:VGNC:31393]	MEST	-1.65114	-1.6513	6.14138	7.61e-12	1.84e-09
ENSBTAG00000049058	530430	inhibin subunit beta B [Source:VGNC Symbol;Acc:VGNC:30201]	INHBB	2.169	2.17226	3.34015	3.02e-10	2.83e-08
ENSBTAG00000012817	783681	jagged canonical Notch ligand 1 [Source:VGNC Symbol;Acc:VGNC:30361]	JAG1	2.48889	2.49209	3.7276	9.13e-09	4.14e-07
ENSBTAG00000046668	783907	angiogenin 2 [Source:NCBI gene (formerly Entrezgene);Acc:783907]	ANG2	-1.92231	-1.92435	2.74776	5.22e-10	4.33e-08
ENSBTAG00000006125	504282	polo like kinase 3 [Source:VGNC Symbol;Acc:VGNC:33035]	PLK3	1.9026	1.90461	3.92051	6.93e-09	3.27e-07
ENSBTAG00000017350	517284	piccolo presynaptic cytomatrix protein [Source:VGNC Symbol;Acc:VGNC:32633]	PCLO	-3.22631	-3.23288	2.28681	3.23e-11	5.33e-09
ENSBTAG00000020638	282094	TIMP metallopeptidase inhibitor 3 [Source:VGNC Symbol;Acc:VGNC:35872]	TIMP3	1.09122	1.09125	8.08274	2.43e-07	6.12e-06
ENSBTAG00000013856	616564	single stranded DNA binding protein 2 [Source:VGNC Symbol;Acc:VGNC:50023]	SSBP2	-1.69218	-1.69243	5.51021	1.39e-10	1.58e-08
ENSBTAG00000001489	404053	tubulin, alpha 1a [Source:NCBI gene (formerly Entrezgene);Acc:404053]	TUBA1A	1.22996	1.23	8.43844	2.83e-09	1.64e-07
ENSBTAG00000009863	506945	basic helix-loop-helix family member e40 [Source:VGNC Symbol;Acc:VGNC:26486]	BHLHE40	1.42749	1.42758	7.40738	3.61e-11	5.6e-09
ENSBTAG00000055045	512251	heat shock protein family B (small) member 7 [Source:VGNC Symbol;Acc:VGNC:49068]	HSPB7	3.32701	3.3569	1.36806	1.26e-08	5.44e-07
ENSBTAG00000020984	537312	Rap guanine nucleotide exchange factor 4 [Source:VGNC Symbol;Acc:VGNC:33725]	RAPGEF4	2.57912	2.58104	4.25349	1.13e-08	4.93e-07
ENSBTAG00000015894	618792	WW domain containing oxidoreductase [Source:VGNC Symbol;Acc:VGNC:36977]	WWOX	-2.09642	-2.10205	1.49858	1.94e-08	7.76e-07
ENSBTAG00000014156	524465	antagonist of mitotic exit network 1 homolog [Source:VGNC Symbol;Acc:VGNC:52604]	AMN1	-1.86545	-1.86673	3.357	6.54e-10	5.14e-08
ENSBTAG00000018546	524279	LPS responsive beige-like anchor protein [Source:VGNC Symbol;Acc:VGNC:30972]	LRBA	-2.41719	-2.41769	5.23749	2e-10	2.04e-08
ENSBTAG00000050052	528288	GTPase, IMAP family member 6 [Source:NCBI gene (formerly Entrezgene);Acc:528288]	0	2.14009	2.14544	2.41325	7.86e-09	3.65e-07
ENSBTAG00000037429	317707	5-hydroxytryptamine receptor 1B [Source:VGNC Symbol;Acc:VGNC:29992]	HTR1B	2.787	2.79415	2.9882	4.22e-08	1.47e-06
ENSBTAG00000010820	613288	Wnt family member 11 [Source:VGNC Symbol;Acc:VGNC:36955]	WNT11	2.31443	2.31906	2.92378	1.55e-07	4.27e-06
ENSBTAG00000001981	407174	solute carrier family 6 member 17 [Source:VGNC Symbol;Acc:VGNC:50163]	SLC6A17	1.5207	1.52085	6.80396	1.35e-06	2.72e-05
ENSBTAG00000012180	541141	Bcl2 modifying factor [Source:VGNC Symbol;Acc:VGNC:26513]	BMF	-1.78519	-1.7861	3.82427	1.14e-09	7.9e-08
ENSBTAG00000016221	535509	angiomotin [Source:VGNC Symbol;Acc:VGNC:25870]	AMOT	-1.85771	-1.85791	6.10117	2.15e-12	6.67e-10
ENSBTAG00000030669	534011	FGGY carbohydrate kinase domain containing [Source:VGNC Symbol;Acc:VGNC:28991]	FGGY	-2.93907	-2.94922	1.3904	3.66e-10	3.27e-08
ENSBTAG00000010907	767949	protein phosphatase 1 regulatory inhibitor subunit 1A [Source:VGNC Symbol;Acc:VGNC:54472]	PPP1R1A	5.18444	5.26595	1.92263	1.58e-09	1.05e-07
ENSBTAG00000002348	282360	solute carrier family 4 member 4 [Source:VGNC Symbol;Acc:VGNC:34894]	SLC4A4	-2.47062	-2.47143	4.60112	4.03e-10	3.5e-08
ENSBTAG00000047380	514876	calcitonin related polypeptide beta [Source:NCBI gene (formerly Entrezgene);Acc:514876]	CALCB	4.04256	4.07987	2.08086	7.1e-08	2.29e-06
ENSBTAG00000050252	#N/A	0	0	3.94051	4.01896	0.852817	3.81e-09	2.05e-07
ENSBTAG00000019975	521554	interleukin 7 receptor [Source:VGNC Symbol;Acc:VGNC:30170]	IL7R	7.23343	7.33005	4.16814	7.13e-11	9.39e-09
ENSBTAG00000023026	281376	serpin family B member 2-like [Source:NCBI gene (formerly Entrezgene);Acc:281376]	0	3.16139	3.16264	5.94247	1.74e-09	1.12e-07
ENSBTAG00000002663	521416	BCAS3 microtubule associated cell migration factor [Source:VGNC Symbol;Acc:VGNC:26438]	BCAS3	-2.38275	-2.3846	3.30971	3.8e-10	3.36e-08
ENSBTAG00000034827	525931	platelet derived growth factor D [Source:VGNC Symbol;Acc:VGNC:32691]	PDGFD	-2.78434	-2.78972	2.13204	1.64e-09	1.08e-07
ENSBTAG00000031441	505584	FXYD domain containing ion transport regulator 5 [Source:VGNC Symbol;Acc:VGNC:29158]	FXYD5	1.75057	1.75146	4.71565	6.25e-09	3.02e-07
ENSBTAG00000020573	529947	signal peptide, CUB domain and EGF like domain containing 2 [Source:VGNC Symbol;Acc:VGNC:34372]	SCUBE2	-2.41338	-2.41473	3.85565	3.46e-11	5.5e-09
ENSBTAG00000011824	280884	osteoglycin [Source:VGNC Symbol;Acc:VGNC:32414]	OGN	-2.01357	-2.0166	2.18743	1.17e-07	3.43e-06
ENSBTAG00000034985	540135	pleckstrin homology like domain family A member 1 [Source:VGNC Symbol;Acc:VGNC:32835]	PHLDA1	2.49917	2.5018	4.18398	2.72e-11	4.72e-09
ENSBTAG00000047502	535704	FKBP prolyl isomerase 5 [Source:VGNC Symbol;Acc:VGNC:29024]	FKBP5	-1.55779	-1.5578	9.46275	2.07e-10	2.07e-08
ENSBTAG00000017566	282104	tuftelin 1 [Source:VGNC Symbol;Acc:VGNC:36518]	TUFT1	1.18681	1.18684	8.24809	8.98e-09	4.09e-07
ENSBTAG00000008182	540819	FosB proto-oncogene, AP-1 transcription factor subunit [Source:VGNC Symbol;Acc:VGNC:29074]	FOSB	3.15902	3.18849	1.80733	1.55e-10	1.7e-08
ENSBTAG00000010101	514128	bystin like [Source:VGNC Symbol;Acc:VGNC:26611]	BYSL	1.74457	1.74514	5.30704	3.43e-11	5.5e-09
ENSBTAG00000007424	280840	LIF interleukin 6 family cytokine [Source:VGNC Symbol;Acc:VGNC:30880]	LIF	2.44945	2.45505	3.35525	1.56e-07	4.29e-06
ENSBTAG00000011986	539290	phospholipid scramblase 4 [Source:VGNC Symbol;Acc:VGNC:33053]	PLSCR4	-1.53945	-1.53991	4.48979	1.65e-08	6.84e-07
ENSBTAG00000007173	282301	platelet derived growth factor receptor alpha [Source:VGNC Symbol;Acc:VGNC:32692]	PDGFRA	-1.20557	-1.20696	2.83596	8.48e-05	0.000913418
ENSBTAG00000033166	#N/A	0	0	-2.9518	-2.96209	1.33218	3.45e-09	1.91e-07
ENSBTAG00000007204	522400	keratin 80 [Source:VGNC Symbol;Acc:VGNC:30742]	KRT80	1.47844	1.47879	5.51959	3.36e-07	8.19e-06
ENSBTAG00000006561	506971	RasGEF domain family member 1B [Source:VGNC Symbol;Acc:VGNC:33744]	RASGEF1B	-2.17815	-2.18458	1.35493	7.75e-08	2.44e-06
ENSBTAG00000021766	522921	heparin binding EGF like growth factor [Source:VGNC Symbol;Acc:VGNC:29765]	HBEGF	2.34001	2.34287	3.8777	6.16e-10	4.98e-08
ENSBTAG00000054342	533051	major histocompatibility class I related protein [Source:NCBI gene (formerly Entrezgene);Acc:533051]	MIC1	2.45606	2.47298	1.60875	2.94e-07	7.28e-06
ENSBTAG00000007778	#N/A	transient receptor potential cation channel subfamily M member 3 [Source:VGNC Symbol;Acc:VGNC:55085]	TRPM3	-2.52594	-2.53305	1.50764	2.41e-09	1.45e-07
ENSBTAG00000012112	530661	solute carrier family 7 member 6 [Source:VGNC Symbol;Acc:VGNC:34931]	SLC7A6	1.88438	1.8846	6.81541	4.54e-10	3.84e-08
ENSBTAG00000011358	505455	immediate early response 3 [Source:VGNC Symbol;Acc:VGNC:30039]	IER3	2.28372	2.28437	6.01716	1.89e-09	1.21e-07
ENSBTAG00000009643	538889	zinc finger and BTB domain containing 25 [Source:VGNC Symbol;Acc:VGNC:37069]	ZBTB25	-1.67657	-1.6787	2.45806	1.66e-07	4.52e-06
ENSBTAG00000010166	104976701	Bos taurus CD99 molecule (MIC2), mRNA. [Source:RefSeq mRNA;Acc:NM_001281907]	MIC2	3.06109	3.08064	1.94647	4.72e-09	2.42e-07
ENSBTAG00000049588	616425	SPT4 homolog, DSIF elongation factor subunit [Source:NCBI gene (formerly Entrezgene);Acc:616425]	SUPT4H1	2.00313	2.00342	6.5411	9.36e-11	1.14e-08
ENSBTAG00000005373	281544	tropomyosin 1 [Source:NCBI gene (formerly Entrezgene);Acc:281544]	TPM1	1.35109	1.35109	11.4818	4.27e-09	2.24e-07
ENSBTAG00000020736	286849	CD40 molecule [Source:VGNC Symbol;Acc:VGNC:27033]	CD40	1.86822	1.87001	3.87278	2.05e-09	1.29e-07
ENSBTAG00000011185	529791	tetratricopeptide repeat domain 23 [Source:VGNC Symbol;Acc:VGNC:36461]	TTC23	-2.17532	-2.17999	1.7572	2.14e-08	8.31e-07
ENSBTAG00000019839	510559	latent transforming growth factor beta binding protein 1 [Source:VGNC Symbol;Acc:VGNC:31071]	LTBP1	-2.37703	-2.3815	2.03978	2.71e-09	1.59e-07
ENSBTAG00000017875	538835	Rho GTPase activating protein 30 [Source:VGNC Symbol;Acc:VGNC:26088]	ARHGAP30	3.02173	3.03011	2.95266	6.29e-08	2.04e-06
ENSBTAG00000012317	493724	purine nucleoside phosphorylase [Source:NCBI gene (formerly Entrezgene);Acc:493724]	PNP	-1.20669	-1.20671	8.69962	8.47e-08	2.6e-06
ENSBTAG00000016388	507969	solute carrier organic anion transporter family member 4A1 [Source:VGNC Symbol;Acc:VGNC:34954]	SLCO4A1	3.70703	3.72164	3.01302	2.36e-08	9.06e-07
ENSBTAG00000010671	785371	GLI family zinc finger 3 [Source:VGNC Symbol;Acc:VGNC:29401]	GLI3	-1.66618	-1.66631	6.51898	1.04e-10	1.23e-08
ENSBTAG00000020796	535287	ubiquitin conjugating enzyme E2 D1 [Source:VGNC Symbol;Acc:VGNC:36579]	UBE2D1	-1.24505	-1.24553	4.10285	6.46e-06	0.000103486
ENSBTAG00000011246	505502	forkhead box P2 [Source:VGNC Symbol;Acc:VGNC:53644]	FOXP2	-2.44505	-2.44843	2.51758	3.4e-10	3.12e-08
ENSBTAG00000005305	280881	neurotensin [Source:VGNC Symbol;Acc:VGNC:32311]	NTS	3.41092	3.41143	7.6584	8.65e-11	1.08e-08
ENSBTAG00000046155	280910	regucalcin [Source:VGNC Symbol;Acc:VGNC:33907]	RGN	-2.86511	-2.8769	1.09261	4.25e-08	1.48e-06
ENSBTAG00000053187	526745	fer-1-like protein 4 [Source:NCBI gene (formerly Entrezgene);Acc:526745]	0	2.82611	2.8312	3.50649	1.37e-07	3.85e-06
ENSBTAG00000049333	112443175	tumor necrosis factor alpha-induced protein 2-like [Source:NCBI gene (formerly Entrezgene);Acc:112443175]	0	4.95925	5.22525	0.529954	1.07e-08	4.72e-07
ENSBTAG00000032519	786620	calmodulin-lysine N-methyltransferase [Source:VGNC Symbol;Acc:VGNC:26727]	CAMKMT	-2.28585	-2.29257	1.33034	3.6e-08	1.3e-06
ENSBTAG00000014178	507082	Ral GTPase activating protein catalytic subunit alpha 2 [Source:VGNC Symbol;Acc:VGNC:33702]	RALGAPA2	-2.38096	-2.39401	0.518006	1.12e-08	4.93e-07
ENSBTAG00000021632	281312	methionine sulfoxide reductase A [Source:VGNC Symbol;Acc:VGNC:31705]	MSRA	-2.48051	-2.4891	1.15664	2.71e-08	1.03e-06
ENSBTAG00000020159	618218	sodium/potassium transporting ATPase interacting 1 [Source:VGNC Symbol;Acc:VGNC:32091]	NKAIN1	2.1357	2.13912	3.18562	6.42e-10	5.11e-08
ENSBTAG00000007644	618399	G protein subunit gamma 7 [Source:VGNC Symbol;Acc:VGNC:29468]	GNG7	-3.32236	-3.33689	1.28446	2.62e-10	2.52e-08
ENSBTAG00000008921	504819	nexilin F-actin binding protein [Source:VGNC Symbol;Acc:VGNC:32025]	NEXN	1.85446	1.85466	6.81447	9.63e-09	4.33e-07
ENSBTAG00000008545	515266	activating transcription factor 3 [Source:VGNC Symbol;Acc:VGNC:26241]	ATF3	1.85714	1.85752	5.9325	4.88e-09	2.47e-07
ENSBTAG00000017405	527470	RAR related orphan receptor C [Source:VGNC Symbol;Acc:VGNC:34090]	RORC	-5.07033	-5.19362	-0.147394	2.1e-08	8.25e-07
ENSBTAG00000001609	286883	mitogen-activated protein kinase kinase 6 [Source:VGNC Symbol;Acc:VGNC:31187]	MAP2K6	-3.78801	-3.81842	0.597969	1.27e-09	8.49e-08
ENSBTAG00000043550	3283889	cytochrome b [Source:NCBI gene (formerly Entrezgene);Acc:3283889]	CYTB	-1.86712	-1.86713	11.3808	3.12e-11	5.29e-09
ENSBTAG00000018007	281945	nuclear receptor subfamily 2 group F member 2 [Source:VGNC Symbol;Acc:VGNC:32241]	NR2F2	-1.4587	-1.4588	6.55913	1.28e-08	5.48e-07
ENSBTAG00000001864	528877	nuclear receptor subfamily 4 group A member 3 [Source:VGNC Symbol;Acc:VGNC:32247]	NR4A3	3.55906	3.57102	3.371	6.83e-11	9.33e-09
ENSBTAG00000003147	537201	Janus kinase 1 [Source:VGNC Symbol;Acc:VGNC:30364]	JAK1	-1.27796	-1.278	7.83125	9.41e-10	6.86e-08
ENSBTAG00000008635	282485	sulfotransferase family, cytosolic, 1A, phenol-preferring, member 1 [Source:NCBI gene (formerly Entrezgene);Acc:282485]	SULT1A1	-1.77213	-1.77216	8.73005	1.65e-11	3.32e-09
ENSBTAG00000018404	282004	protein kinase cGMP-dependent 1 [Source:VGNC Symbol;Acc:VGNC:33340]	PRKG1	-3.60806	-3.62821	0.968704	1.24e-08	5.38e-07
ENSBTAG00000024000	616225	atonal bHLH transcription factor 8 [Source:VGNC Symbol;Acc:VGNC:26272]	ATOH8	-2.09143	-2.09259	3.71523	3.67e-09	2e-07
ENSBTAG00000012584	539935	gap junction protein beta 3 [Source:VGNC Symbol;Acc:VGNC:29378]	GJB3	2.25385	2.25718	3.40477	5.74e-10	4.73e-08
ENSBTAG00000001725	615107	C-X-C motif chemokine ligand 10 [Source:VGNC Symbol;Acc:VGNC:27846]	CXCL10	-1.77814	-1.77858	4.70891	4.81e-08	1.63e-06
ENSBTAG00000009012	541148	pentraxin 3 [Source:VGNC Symbol;Acc:VGNC:33566]	PTX3	-2.25643	-2.26246	1.55456	1.32e-08	5.63e-07
ENSBTAG00000050113	#N/A	0	0	-4.7316	-4.91139	-0.857351	3.94e-08	1.4e-06
ENSBTAG00000040151	286815	GTP cyclohydrolase 1 [Source:VGNC Symbol;Acc:VGNC:29286]	GCH1	2.15298	2.15619	3.31785	3.98e-09	2.11e-07
ENSBTAG00000020178	533618	arylsulfatase family member K [Source:VGNC Symbol;Acc:VGNC:26179]	ARSK	-3.06955	-3.09529	0.21673	2.09e-08	8.21e-07
ENSBTAG00000013176	615490	SPARC related modular calcium binding 2 [Source:VGNC Symbol;Acc:VGNC:35027]	SMOC2	-2.48866	-2.48971	4.27906	6.01e-11	8.42e-09
ENSBTAG00000001112	527211	spermine oxidase [Source:VGNC Symbol;Acc:VGNC:35028]	SMOX	-2.2048	-2.2059	4.0074	2.73e-10	2.59e-08
ENSBTAG00000054135	#N/A	0	0	4.05743	4.1081	1.6315	3.92e-08	1.39e-06
ENSBTAG00000033365	785203	methyltransferase like 24 [Source:VGNC Symbol;Acc:VGNC:31409]	METTL24	-4.48606	-4.66461	-1.11367	4.57e-07	1.06e-05
ENSBTAG00000048511	#N/A	0	0	3.61485	3.64532	2.03535	6.8e-10	5.23e-08
ENSBTAG00000017514	524530	cyclin D1 [Source:VGNC Symbol;Acc:VGNC:26962]	CCND1	2.24533	2.24689	4.57069	2.08e-06	3.89e-05
ENSBTAG00000052140	617493	allograft inflammatory factor 1 like [Source:VGNC Symbol;Acc:VGNC:25760]	AIF1L	1.03844	1.03851	7.23883	3.58e-07	8.58e-06
ENSBTAG00000011932	280867	proteoglycan 4 [Source:VGNC Symbol;Acc:VGNC:33314]	PRG4	-2.50081	-2.50243	3.67238	3.04e-09	1.72e-07
ENSBTAG00000020799	616280	exocyst complex component 6B [Source:VGNC Symbol;Acc:VGNC:28651]	EXOC6B	-2.01873	-2.01966	3.98931	8.73e-10	6.5e-08
ENSBTAG00000005284	513955	serpin family E member 3 [Source:VGNC Symbol;Acc:VGNC:34477]	SERPINE3	4.84311	4.91415	1.62984	4.97e-09	2.5e-07
ENSBTAG00000016711	414346	peptidylprolyl isomerase F [Source:VGNC Symbol;Acc:VGNC:33198]	PPIF	2.03282	2.03391	4.67449	7.55e-10	5.69e-08
ENSBTAG00000005247	533321	FERM domain containing 3 [Source:VGNC Symbol;Acc:VGNC:29113]	FRMD3	-4.7397	-4.97481	-1.1271	6.27e-08	2.04e-06
ENSBTAG00000010303	281839	intercellular adhesion molecule 1 [Source:VGNC Symbol;Acc:VGNC:50197]	ICAM1	2.54453	2.54506	6.44863	7.09e-09	3.34e-07
ENSBTAG00000052722	#N/A	0	0	1.72535	1.72789	3.00708	1.6e-07	4.38e-06
ENSBTAG00000017746	615883	slit guidance ligand 3 [Source:VGNC Symbol;Acc:VGNC:34961]	SLIT3	-3.28845	-3.29099	3.78112	1.62e-11	3.32e-09
ENSBTAG00000038215	534256	chloride channel accessory 2 [Source:VGNC Symbol;Acc:VGNC:27393]	CLCA2	4.19004	4.3687	-0.0582414	1.94e-08	7.76e-07
ENSBTAG00000006293	767997	placenta enriched 1 [Source:VGNC Symbol;Acc:VGNC:32968]	PLAC1	-3.70617	-3.79521	-0.880209	7.5e-08	2.39e-06
ENSBTAG00000038117	787344	autophagy related 10 [Source:VGNC Symbol;Acc:VGNC:26248]	ATG10	-2.8727	-2.8825	1.39059	9.27e-10	6.82e-08
ENSBTAG00000007698	507157	transmembrane protein 59 like [Source:VGNC Symbol;Acc:VGNC:36100]	TMEM59L	2.76288	2.7642	5.45906	2.54e-07	6.35e-06
ENSBTAG00000015293	541093	neurexophilin 3 [Source:VGNC Symbol;Acc:VGNC:32382]	NXPH3	1.55921	1.56135	3.32568	2.03e-06	3.84e-05
ENSBTAG00000019194	508335	shieldin complex subunit 2 [Source:VGNC Symbol;Acc:VGNC:28808]	SHLD2	-2.43042	-2.43405	2.39781	5.12e-09	2.55e-07
ENSBTAG00000048485	100295973	tubulin beta 2A class IIa [Source:NCBI gene (formerly Entrezgene);Acc:100295973]	TUBB2A	1.75081	1.75194	4.30706	1.07e-06	2.23e-05
ENSBTAG00000016277	615506	mitochondrial amidoxime reducing component 2 [Source:VGNC Symbol;Acc:VGNC:97289]	MTARC2	-1.75336	-1.7538	4.7871	3.14e-09	1.77e-07
ENSBTAG00000011424	497015	tropomyosin 2 [Source:VGNC Symbol;Acc:VGNC:36252]	TPM2	1.46418	1.46422	8.67346	1.34e-06	2.7e-05
ENSBTAG00000002982	518986	PITPNM family member 3 [Source:VGNC Symbol;Acc:VGNC:52807]	PITPNM3	-3.55672	-3.59101	0.23483	1.73e-08	7.06e-07
ENSBTAG00000026971	613318	cell division cycle associated 5 [Source:VGNC Symbol;Acc:VGNC:56261]	CDCA5	1.3503	1.35084	4.76125	9.28e-08	2.82e-06
ENSBTAG00000032121	100125578	succinyl-CoA:glutarate-CoA transferase [Source:VGNC Symbol;Acc:VGNC:35462]	SUGCT	-3.49887	-3.53652	0.0245931	7.29e-08	2.33e-06
ENSBTAG00000008631	282196	coronin 1A [Source:VGNC Symbol;Acc:VGNC:27620]	CORO1A	1.73285	1.73715	2.3526	5.45e-07	1.23e-05
ENSBTAG00000048029	281308	matrix metallopeptidase 1 (interstitial collagenase) [Source:NCBI gene (formerly Entrezgene);Acc:281308]	MMP1	4.54756	4.55671	4.75127	1.12e-08	4.92e-07
ENSBTAG00000013462	516017	L1 cell adhesion molecule [Source:VGNC Symbol;Acc:VGNC:30760]	L1CAM	2.76064	2.76518	3.54494	1.06e-07	3.14e-06
ENSBTAG00000015818	112441463	interstitial collagenase-like [Source:NCBI gene (formerly Entrezgene);Acc:112441463]	0	4.26622	4.27573	4.61118	1.67e-08	6.86e-07
ENSBTAG00000045767	505016	linker for activation of T cells family member 2 [Source:VGNC Symbol;Acc:VGNC:30799]	LAT2	4.23954	4.34956	0.796822	1e-06	2.1e-05
ENSBTAG00000000494	539556	phosphodiesterase 4D [Source:VGNC Symbol;Acc:VGNC:32677]	PDE4D	-1.19031	-1.19202	2.26759	5.81e-05	0.000656707
ENSBTAG00000002938	617867	cadherin like and PC-esterase domain containing 1 [Source:VGNC Symbol;Acc:VGNC:27651]	CPED1	-1.67317	-1.67379	4.19069	3.83e-09	2.05e-07
ENSBTAG00000014831	539466	protein phosphatase 1 regulatory subunit 3C [Source:VGNC Symbol;Acc:VGNC:33244]	PPP1R3C	-2.01857	-2.02258	1.77811	4.73e-06	7.84e-05
ENSBTAG00000004432	100336905	Bos taurus chordin like 1 (CHRDL1), mRNA. [Source:RefSeq mRNA;Acc:NM_001205187]	CHRDL1	-1.56862	-1.56889	5.28403	2.07e-10	2.07e-08
ENSBTAG00000014614	515610	actin alpha 2, smooth muscle [Source:NCBI gene (formerly Entrezgene);Acc:515610]	ACTA2	1.81174	1.81176	10.0535	3.52e-06	6.16e-05
ENSBTAG00000021133	511615	teneurin transmembrane protein 3 [Source:VGNC Symbol;Acc:VGNC:35743]	TENM3	-2.52914	-2.53097	3.5275	5.54e-11	8.02e-09
ENSBTAG00000005929	#N/A	spectrin beta, non-erythrocytic 2 [Source:HGNC Symbol;Acc:HGNC:11276]	SPTBN2	2.1223	2.12352	4.87775	1.16e-08	5.04e-07
ENSBTAG00000018252	538517	arrestin domain containing 4 [Source:VGNC Symbol;Acc:VGNC:26174]	ARRDC4	-1.1417	-1.14193	5.13502	7.11e-06	0.000110867
ENSBTAG00000002340	538861	STEAP4 metalloreductase [Source:VGNC Symbol;Acc:VGNC:35381]	STEAP4	-3.00851	-3.07052	-0.894866	6.89e-06	0.000108008
ENSBTAG00000014575	511602	collagen type IV alpha 5 chain [Source:VGNC Symbol;Acc:VGNC:50084]	COL4A5	-1.6837	-1.68372	9.10375	3.23e-11	5.33e-09
ENSBTAG00000031774	515957	H1.12 linker histone, cluster member [Source:VGNC Symbol;Acc:VGNC:83563]	H1-12	-2.198	-2.22369	-0.453002	2.49e-06	4.57e-05
ENSBTAG00000047213	112441497	G protein-coupled receptor associated sorting protein 1 [Source:NCBI gene (formerly Entrezgene);Acc:112441497]	0	-1.65242	-1.65388	3.01333	3.52e-09	1.94e-07
ENSBTAG00000010716	107131184	Fraser extracellular matrix complex subunit 1 [Source:VGNC Symbol;Acc:VGNC:59334]	FRAS1	1.26838	1.26858	5.93561	1.4e-07	3.93e-06
ENSBTAG00000030198	100295019	transmembrane protein 232 [Source:VGNC Symbol;Acc:VGNC:36046]	TMEM232	-3.19919	-3.22621	0.238743	1.56e-08	6.53e-07
ENSBTAG00000032481	574085	death associated protein like 1 [Source:VGNC Symbol;Acc:VGNC:27879]	DAPL1	-1.9963	-1.99745	3.63096	2.77e-09	1.62e-07
ENSBTAG00000019804	513526	small nuclear ribonucleoprotein U11/U12 subunit 25 [Source:VGNC Symbol;Acc:VGNC:35069]	SNRNP25	1.9629	1.96321	6.43159	9.49e-10	6.87e-08
ENSBTAG00000013136	617365	EF-hand calcium binding domain 11 [Source:VGNC Symbol;Acc:VGNC:28340]	EFCAB11	-1.70289	-1.70558	2.16363	1.66e-08	6.86e-07
ENSBTAG00000001303	539524	heat shock protein family B (small) member 8 [Source:VGNC Symbol;Acc:VGNC:53907]	HSPB8	1.62374	1.6243	5.03429	3.58e-11	5.6e-09
ENSBTAG00000005714	533219	actin alpha cardiac muscle 1 [Source:VGNC Symbol;Acc:VGNC:25574]	ACTC1	2.81795	2.83512	1.8456	9.69e-09	4.34e-07
ENSBTAG00000032092	785475	cadherin 11 [Source:VGNC Symbol;Acc:VGNC:27092]	CDH11	-1.55046	-1.55049	8.84573	5.9e-09	2.89e-07
ENSBTAG00000021202	514788	acyl-CoA thioesterase 7 [Source:NCBI gene (formerly Entrezgene);Acc:514788]	ACOT7	1.39871	1.39914	5.19575	1.41e-07	3.95e-06
ENSBTAG00000000836	281269	keratin 8 [Source:VGNC Symbol;Acc:VGNC:50407]	KRT8	1.34636	1.34637	10.6022	5.56e-08	1.84e-06
ENSBTAG00000004562	511000	CD207 molecule [Source:VGNC Symbol;Acc:VGNC:27011]	CD207	-1.89116	-1.89305	2.83308	1.24e-09	8.45e-08
ENSBTAG00000048631	536517	TIAM Rac1 associated GEF 1 [Source:NCBI gene (formerly Entrezgene);Acc:536517]	0	-2.60763	-2.61032	2.97785	2.62e-09	1.56e-07
ENSBTAG00000048497	#N/A	0	0	1.51775	1.51915	3.68712	1.73e-08	7.06e-07
ENSBTAG00000016991	100139818	ephrin B2 [Source:VGNC Symbol;Acc:VGNC:28360]	EFNB2	1.02558	1.0264	3.60537	0.000738809	0.00597422
ENSBTAG00000010427	539767	Ras association domain family member 5 [Source:VGNC Symbol;Acc:VGNC:33761]	RASSF5	1.34145	1.34266	3.53427	3.57e-08	1.29e-06
ENSBTAG00000015369	539519	MLLT11 transcription factor 7 cofactor [Source:VGNC Symbol;Acc:VGNC:31502]	MLLT11	2.04698	2.04788	4.8256	2.82e-09	1.64e-07
ENSBTAG00000017245	536616	COPI coat complex subunit gamma 2 [Source:VGNC Symbol;Acc:VGNC:27597]	COPG2	-1.69984	-1.70017	5.15294	7.55e-10	5.69e-08
ENSBTAG00000009679	525772	pleckstrin homology and RhoGEF domain containing G1 [Source:VGNC Symbol;Acc:VGNC:33014]	PLEKHG1	4.16782	4.23737	1.33588	6.2e-08	2.02e-06
ENSBTAG00000002576	781681	gliomedin [Source:VGNC Symbol;Acc:VGNC:29396]	GLDN	1.51756	1.5198	2.72019	2.25e-05	0.000292929
ENSBTAG00000003490	509821	engulfment and cell motility 1 [Source:VGNC Symbol;Acc:VGNC:28438]	ELMO1	-3.14568	-3.14805	3.65034	4.87e-09	2.47e-07
ENSBTAG00000022991	525624	neurobeachin [Source:VGNC Symbol;Acc:VGNC:31893]	NBEA	-1.83796	-1.83942	3.11463	4.13e-08	1.44e-06
ENSBTAG00000046755	#N/A	0	0	-2.92519	-2.95491	-0.146709	2.21e-07	5.67e-06
ENSBTAG00000025903	507688	glycine decarboxylase [Source:VGNC Symbol;Acc:VGNC:29395]	GLDC	2.11172	2.12529	1.25753	9.36e-07	1.98e-05
ENSBTAG00000015872	282431	prokineticin receptor 2 [Source:VGNC Symbol;Acc:VGNC:33363]	PROKR2	2.69453	2.71331	1.43146	1.23e-07	3.56e-06
ENSBTAG00000000919	538619	hes related family bHLH transcription factor with YRPW motif 2 [Source:VGNC Symbol;Acc:VGNC:29829]	HEY2	3.92465	3.97502	1.34299	4.67e-08	1.6e-06
ENSBTAG00000011338	100125763	neuronal regeneration related protein [Source:NCBI gene (formerly Entrezgene);Acc:100125763]	NREP	-3.01042	-3.01224	3.92317	5.07e-09	2.54e-07
ENSBTAG00000020614	507041	protein kinase C epsilon [Source:VGNC Symbol;Acc:VGNC:33330]	PRKCE	-2.33433	-2.33741	2.54192	4.8e-09	2.45e-07
ENSBTAG00000001829	518062	solute carrier family 17 member 9 [Source:VGNC Symbol;Acc:VGNC:34704]	SLC17A9	1.75056	1.75467	2.7659	5.19e-06	8.53e-05
ENSBTAG00000013065	497622	homeostatic iron regulator [Source:VGNC Symbol;Acc:VGNC:29831]	HFE	-1.63241	-1.63323	3.77988	1.91e-09	1.22e-07
ENSBTAG00000017775	616342	SHH signaling and ciliogenesis regulator SDCCAG8 [Source:VGNC Symbol;Acc:VGNC:96545]	SDCCAG8	-1.54717	-1.54817	3.381	5.95e-09	2.9e-07
ENSBTAG00000002695	#N/A	myosin IH [Source:VGNC Symbol;Acc:VGNC:31823]	MYO1H	2.01007	2.01233	3.60173	6.96e-07	1.53e-05
ENSBTAG00000021487	104968463	circadian associated repressor of transcription [Source:VGNC Symbol;Acc:VGNC:27358]	CIART	-1.50128	-1.50244	3.16937	1.68e-07	4.54e-06
ENSBTAG00000000986	530709	USH1 protein network component harmonin [Source:VGNC Symbol;Acc:VGNC:36704]	USH1C	1.19593	1.19652	4.45419	8.81e-06	0.000132087
ENSBTAG00000005300	514936	transmembrane protein 51 [Source:VGNC Symbol;Acc:VGNC:36094]	TMEM51	1.29476	1.29521	4.89135	2.53e-08	9.63e-07
ENSBTAG00000004585	#N/A	coiled-coil domain containing 30 [Source:VGNC Symbol;Acc:VGNC:26891]	CCDC30	-2.49224	-2.49662	2.19791	1.97e-08	7.83e-07
ENSBTAG00000022613	510767	cytochrome c, somatic [Source:NCBI gene (formerly Entrezgene);Acc:510767]	CYCS	1.80757	1.80819	5.1758	3.62e-10	3.25e-08
ENSBTAG00000040409	790886	uncharacterized LOC790886 [Source:NCBI gene (formerly Entrezgene);Acc:790886]	0	-4.90726	-5.03011	-0.294727	4.38e-07	1.03e-05
ENSBTAG00000017425	407154	gap junction protein beta 2 [Source:VGNC Symbol;Acc:VGNC:29377]	GJB2	2.8658	2.87133	3.56689	1.52e-10	1.68e-08
ENSBTAG00000005238	786958	NCK associated protein 5 [Source:VGNC Symbol;Acc:VGNC:56130]	NCKAP5	-7.14862	-1.44269e+08	-1.4096	2.12e-07	5.48e-06
ENSBTAG00000032613	508224	secretogranin V [Source:VGNC Symbol;Acc:VGNC:34334]	SCG5	-2.43617	-2.44935	0.58593	1.13e-07	3.33e-06
ENSBTAG00000015470	514665	synaptophysin like 2 [Source:VGNC Symbol;Acc:VGNC:54496]	SYPL2	1.50666	1.51275	1.45927	8.92e-05	0.000956422
ENSBTAG00000046333	101904203	chromosome 6 C4orf54 homolog [Source:VGNC Symbol;Acc:VGNC:58594]	C6H4orf54	5.51231	6.0072	0.212007	1.63e-06	3.18e-05
ENSBTAG00000016217	617625	RNA binding motif protein 43 [Source:VGNC Symbol;Acc:VGNC:33802]	RBM43	-1.61657	-1.6181	2.87624	5.16e-09	2.57e-07
ENSBTAG00000010238	613482	leukotriene B4 receptor [Source:VGNC Symbol;Acc:VGNC:31069]	LTB4R	2.91775	2.92198	3.89994	2.38e-09	1.45e-07
ENSBTAG00000046337	534206	tubulin beta 6 class V [Source:VGNC Symbol;Acc:VGNC:36509]	TUBB6	1.66144	1.66159	7.22919	4.78e-06	7.9e-05
ENSBTAG00000017691	100335299	KIAA0040 ortholog [Source:NCBI gene (formerly Entrezgene);Acc:100335299]	0	1.17365	1.1749	3.33873	6.54e-06	0.000104353
ENSBTAG00000009733	513483	fructose-bisphosphatase 1 [Source:VGNC Symbol;Acc:VGNC:28887]	FBP1	1.88319	1.88994	1.70707	7.07e-07	1.55e-05
ENSBTAG00000008541	493719	microsomal glutathione S-transferase 1 [Source:VGNC Symbol;Acc:VGNC:31451]	MGST1	-1.77736	-1.7775	6.54301	3.19e-09	1.79e-07
ENSBTAG00000017104	281333	mucin 1, cell surface associated [Source:VGNC Symbol;Acc:VGNC:59186]	MUC1	1.70887	1.71219	2.67344	1.44e-07	4e-06
ENSBTAG00000018638	517240	coiled-coil and C2 domain containing 2A [Source:VGNC Symbol;Acc:VGNC:26826]	CC2D2A	-1.95788	-1.95868	4.15345	2.23e-10	2.21e-08
ENSBTAG00000006256	541043	protein tyrosine phosphatase receptor type O [Source:VGNC Symbol;Acc:VGNC:33555]	PTPRO	-2.61011	-2.61117	4.3976	7.09e-11	9.39e-09
ENSBTAG00000053661	#N/A	0	0	2.00568	2.01788	1.18142	2.87e-06	5.15e-05
ENSBTAG00000021953	506466	LARGE xylosyl- and glucuronyltransferase 1 [Source:VGNC Symbol;Acc:VGNC:54444]	LARGE1	-1.67718	-1.67749	5.20918	1.07e-09	7.55e-08
ENSBTAG00000010029	537173	ELKS/RAB6-interacting/CAST family member 2 [Source:VGNC Symbol;Acc:VGNC:28567]	ERC2	-3.05008	-3.08644	-0.252287	2.37e-07	6.01e-06
ENSBTAG00000021161	618618	cellular repressor of E1A stimulated genes 2 [Source:VGNC Symbol;Acc:VGNC:27703]	CREG2	3.1281	3.14933	1.72211	6.35e-07	1.41e-05
ENSBTAG00000005998	540641	nocturnin [Source:VGNC Symbol;Acc:VGNC:32149]	NOCT	1.98654	1.98921	3.59759	5.69e-09	2.81e-07
ENSBTAG00000021911	540575	protein tyrosine phosphatase receptor type G [Source:VGNC Symbol;Acc:VGNC:33551]	PTPRG	-2.48163	-2.48311	3.77658	1.67e-08	6.86e-07
ENSBTAG00000043563	3283887	NADH dehydrogenase subunit 5 [Source:NCBI gene (formerly Entrezgene);Acc:3283887]	ND5	-1.66141	-1.66141	11.6558	1.99e-10	2.04e-08
ENSBTAG00000044125	614522	transmembrane protein 56 [Source:NCBI gene (formerly Entrezgene);Acc:614522]	TLCD4	-1.41824	-1.4188	4.11376	4.37e-08	1.51e-06
ENSBTAG00000027151	538219	Rho GTPase activating protein 26 [Source:VGNC Symbol;Acc:VGNC:26084]	ARHGAP26	-2.24558	-2.25322	1.14948	3.95e-08	1.4e-06
ENSBTAG00000016627	531488	WASP family member 1 [Source:VGNC Symbol;Acc:VGNC:36865]	WASF1	-2.02532	-2.0378	0.249276	2.71e-06	4.9e-05
ENSBTAG00000009477	790878	pirin [Source:VGNC Symbol;Acc:VGNC:32915]	PIR	-1.94219	-1.94332	3.59617	3.37e-08	1.23e-06
ENSBTAG00000054306	#N/A	0	0	1.62594	1.62626	5.78098	7.85e-10	5.88e-08
ENSBTAG00000014402	531516	GTPase, IMAP family member 8 [Source:VGNC Symbol;Acc:VGNC:29357]	GIMAP8	1.62103	1.62153	5.12782	1.02e-07	3.05e-06
ENSBTAG00000007036	518849	solute carrier family 17 member 7 [Source:VGNC Symbol;Acc:VGNC:34702]	SLC17A7	1.87523	1.88177	1.85433	1.17e-06	2.41e-05
ENSBTAG00000025942	512259	15-hydroxyprostaglandin dehydrogenase [Source:VGNC Symbol;Acc:VGNC:56973]	HPGD	-2.78101	-2.78575	2.30147	3.12e-08	1.16e-06
ENSBTAG00000025589	530159	CDK5 regulatory subunit associated protein 1 like 1 [Source:VGNC Symbol;Acc:VGNC:27137]	CDKAL1	-1.89981	-1.90075	3.83439	3.38e-09	1.88e-07
ENSBTAG00000020648	535130	sec1 family domain containing 2 [Source:VGNC Symbol;Acc:VGNC:34331]	SCFD2	-1.77377	-1.77449	4.11886	9.37e-09	4.23e-07
ENSBTAG00000054628	617469	prostate transmembrane protein, androgen induced 1 [Source:NCBI gene (formerly Entrezgene);Acc:617469]	PMEPA1	1.52949	1.52979	5.73387	1.26e-07	3.63e-06
ENSBTAG00000021685	515233	eukaryotic translation elongation factor 1 alpha 2 [Source:VGNC Symbol;Acc:VGNC:50164]	EEF1A2	3.75473	3.79709	1.37626	4.79e-08	1.63e-06
ENSBTAG00000018016	614673	nuclear protein 1, transcriptional regulator [Source:VGNC Symbol;Acc:VGNC:32369]	NUPR1	-2.49472	-2.49612	3.90906	1.5e-09	9.97e-08
ENSBTAG00000008605	789044	dynein axonemal heavy chain 2 [Source:VGNC Symbol;Acc:VGNC:28125]	DNAH2	3.30013	3.42973	-0.281616	2.89e-06	5.17e-05
ENSBTAG00000007319	517405	jagged canonical Notch ligand 2 [Source:VGNC Symbol;Acc:VGNC:30362]	JAG2	2.49531	2.49899	3.686	1.63e-06	3.18e-05
ENSBTAG00000005850	540262	delta like non-canonical Notch ligand 2 [Source:VGNC Symbol;Acc:VGNC:28093]	DLK2	3.51176	3.56097	1.39028	4.45e-06	7.44e-05
ENSBTAG00000048296	513188	collectrin, amino acid transport regulator [Source:NCBI gene (formerly Entrezgene);Acc:513188]	CLTRN	-1.41907	-1.41976	3.75601	3.25e-07	7.96e-06
ENSBTAG00000021050	513144	endothelin converting enzyme like 1 [Source:VGNC Symbol;Acc:VGNC:28304]	ECEL1	4.91665	5.05562	1.31965	3.3e-08	1.21e-06
ENSBTAG00000016042	515889	transmembrane 6 superfamily member 2 [Source:VGNC Symbol;Acc:VGNC:35909]	TM6SF2	1.41262	1.4171	1.92856	5.63e-06	9.13e-05
ENSBTAG00000013860	505463	growth arrest and DNA damage inducible alpha [Source:VGNC Symbol;Acc:VGNC:29206]	GADD45A	1.41276	1.41297	6.17536	4.46e-09	2.32e-07
ENSBTAG00000001492	535347	FYN binding protein 1 [Source:VGNC Symbol;Acc:VGNC:29160]	FYB1	-2.92072	-2.93347	1.02884	1.81e-08	7.31e-07
ENSBTAG00000012969	541161	dickkopf WNT signaling pathway inhibitor 2 [Source:VGNC Symbol;Acc:VGNC:28080]	DKK2	1.8433	1.8447	4.02653	1.19e-09	8.13e-08
ENSBTAG00000004459	509461	transmembrane protein 45A [Source:NCBI gene (formerly Entrezgene);Acc:509461]	TMEM45A	-1.71792	-1.71814	5.75285	2.32e-10	2.29e-08
ENSBTAG00000004099	787062	coiled-coil domain containing 170 [Source:VGNC Symbol;Acc:VGNC:26867]	CCDC170	-3.17307	-3.18744	1.09258	8.04e-08	2.49e-06
ENSBTAG00000003265	505225	adducin 3 [Source:VGNC Symbol;Acc:VGNC:25655]	ADD3	-1.34153	-1.3416	7.05805	6.15e-08	2.01e-06
ENSBTAG00000003705	100139162	family with sequence similarity 83 member G [Source:VGNC Symbol;Acc:VGNC:28838]	FAM83G	1.39091	1.39297	3.14819	1.11e-05	0.000160221
ENSBTAG00000039509	516026	G protein-coupled receptor class C group 5 member A [Source:VGNC Symbol;Acc:VGNC:29606]	GPRC5A	1.86129	1.86292	3.96276	5.12e-07	1.17e-05
ENSBTAG00000031886	614958	H2B clustered histone 15 [Source:VGNC Symbol;Acc:VGNC:83587]	H2BC15	-1.59094	-1.59175	3.75105	9.77e-06	0.000144196
ENSBTAG00000005603	516104	C-X-C motif chemokine ligand 11 [Source:VGNC Symbol;Acc:VGNC:27847]	CXCL11	-1.93842	-1.93961	3.43296	1.42e-06	2.81e-05
ENSBTAG00000011101	516921	EMAP like 6 [Source:VGNC Symbol;Acc:VGNC:28480]	EML6	-1.98681	-1.998	0.410402	1.86e-06	3.55e-05
ENSBTAG00000001250	505849	transcription factor AP-2 alpha [Source:VGNC Symbol;Acc:VGNC:35776]	TFAP2A	-1.41096	-1.41104	6.9198	1.71e-10	1.79e-08
ENSBTAG00000012058	617688	GDP-mannose 4,6-dehydratase [Source:VGNC Symbol;Acc:VGNC:55901]	GMDS	-2.15321	-2.15614	2.41285	1.67e-07	4.54e-06
ENSBTAG00000026919	613986	PX domain containing 1 [Source:VGNC Symbol;Acc:VGNC:33582]	PXDC1	1.41908	1.42027	3.63399	9.13e-06	0.000136235
ENSBTAG00000009760	515736	uncharacterized LOC515736 [Source:NCBI gene (formerly Entrezgene);Acc:515736]	0	-1.41188	-1.4122	4.9983	6.42e-09	3.08e-07
ENSBTAG00000006835	281301	melanoma cell adhesion molecule [Source:NCBI gene (formerly Entrezgene);Acc:281301]	MCAM	1.63959	1.64072	4.18789	3.03e-06	5.36e-05
ENSBTAG00000019596	516334	G protein-coupled receptor class C group 5 member B [Source:VGNC Symbol;Acc:VGNC:29607]	GPRC5B	1.61084	1.61189	4.20289	1.72e-06	3.32e-05
ENSBTAG00000050233	785916	proline rich and Gla domain 1 [Source:NCBI gene (formerly Entrezgene);Acc:785916]	PRRG1	-1.11877	-1.11907	4.61842	6.62e-06	0.000105017
ENSBTAG00000018563	510821	secreted frizzled related protein 2 [Source:VGNC Symbol;Acc:VGNC:34521]	SFRP2	-1.54761	-1.54762	10.2002	6.43e-10	5.11e-08
ENSBTAG00000012046	514246	JunB proto-oncogene, AP-1 transcription factor subunit [Source:VGNC Symbol;Acc:VGNC:30387]	JUNB	2.6976	2.70115	4.1144	1.68e-07	4.54e-06
ENSBTAG00000034529	618849	high mobility group AT-hook 1 [Source:VGNC Symbol;Acc:VGNC:29874]	HMGA1	2.15656	2.15721	5.79986	2.63e-10	2.52e-08
ENSBTAG00000010672	614302	propionyl-CoA carboxylase subunit alpha [Source:VGNC Symbol;Acc:VGNC:32613]	PCCA	-1.76364	-1.76454	3.80374	6.92e-10	5.27e-08
ENSBTAG00000031335	614152	BRISC and BRCA1 A complex member 2 [Source:VGNC Symbol;Acc:VGNC:26399]	BABAM2	-1.57426	-1.57459	5.04973	2.49e-10	2.42e-08
ENSBTAG00000020213	532275	NIPA like domain containing 4 [Source:VGNC Symbol;Acc:VGNC:32084]	NIPAL4	2.00628	2.01044	2.62181	1.41e-06	2.81e-05
ENSBTAG00000009150	282866	spondin 1 [Source:VGNC Symbol;Acc:VGNC:35227]	SPON1	-3.31083	-3.39763	-1.14286	9.37e-06	0.000139296
ENSBTAG00000017249	525332	somatomedin B and thrombospondin type 1 domain containing [Source:VGNC Symbol;Acc:VGNC:34311]	SBSPON	1.39163	1.39229	4.38691	4.34e-08	1.5e-06
ENSBTAG00000026247	100336824	PKHD1 like 1 [Source:NCBI gene (formerly Entrezgene);Acc:100336824]	PKHD1L1	-1.83701	-1.84056	1.85594	1.75e-07	4.69e-06
ENSBTAG00000006017	526392	nuclear factor kappa B subunit 2 [Source:VGNC Symbol;Acc:VGNC:32044]	NFKB2	1.52998	1.53023	6.37255	1.43e-08	6.05e-07
ENSBTAG00000038878	518393	aldehyde oxidase 1-like [Source:NCBI gene (formerly Entrezgene);Acc:518393]	AOX4	5.98897	6.17453	1.55565	3.64e-08	1.31e-06
ENSBTAG00000016649	615414	cyclin D2 [Source:VGNC Symbol;Acc:VGNC:26963]	CCND2	1.60146	1.6032	3.54024	2.96e-06	5.28e-05
ENSBTAG00000015511	515925	fatty acid desaturase 3 [Source:VGNC Symbol;Acc:VGNC:28703]	FADS3	1.70798	1.70832	6.00145	3.98e-06	6.79e-05
ENSBTAG00000006189	404122	actin gamma 1 [Source:NCBI gene (formerly Entrezgene);Acc:404122]	ACTG1	1.13144	1.13144	11.8245	5.39e-08	1.81e-06
ENSBTAG00000003809	540771	phospholipase C delta 4 [Source:VGNC Symbol;Acc:VGNC:32986]	PLCD4	-1.66433	-1.67497	0.176784	9.92e-05	0.00104577
ENSBTAG00000046838	#N/A	0	0	-2.62184	-2.63392	0.814549	2.58e-07	6.42e-06
ENSBTAG00000043962	613556	solute carrier family 2 member 13 [Source:VGNC Symbol;Acc:VGNC:34799]	SLC2A13	-2.43732	-2.4495	0.764783	5.37e-08	1.81e-06
ENSBTAG00000039090	514533	MAGE family member H1 [Source:VGNC Symbol;Acc:VGNC:31145]	MAGEH1	-1.07746	-1.07778	4.58312	2.23e-06	4.13e-05
ENSBTAG00000047675	618268	sialic acid-binding Ig-like lectin 5 [Source:NCBI gene (formerly Entrezgene);Acc:618268]	0	2.32719	2.33839	1.80207	1.22e-05	0.000174317
ENSBTAG00000051832	#N/A	0	0	3.97589	4.02637	1.55512	1.68e-08	6.9e-07
ENSBTAG00000015562	317710	phospholipase B domain containing 1 [Source:VGNC Symbol;Acc:VGNC:32978]	PLBD1	-1.72985	-1.73028	4.82593	4.49e-10	3.82e-08
ENSBTAG00000021933	407169	arachidonate 12-lipoxygenase, 12S type [Source:VGNC Symbol;Acc:VGNC:25841]	ALOX12	3.79327	3.84331	1.22832	2.67e-09	1.58e-07
ENSBTAG00000015197	532283	kelch domain containing 8A [Source:VGNC Symbol;Acc:VGNC:30639]	KLHDC8A	2.03643	2.04502	1.92964	1.94e-06	3.7e-05
ENSBTAG00000013955	533451	trafficking protein particle complex 9 [Source:VGNC Symbol;Acc:VGNC:36294]	TRAPPC9	-2.29455	-2.29662	3.09417	3.29e-08	1.21e-06
ENSBTAG00000012113	506250	holocytochrome c synthase [Source:VGNC Symbol;Acc:VGNC:29770]	HCCS	1.33534	1.33563	5.63372	1.09e-09	7.69e-08
ENSBTAG00000000357	533821	PEAK1 related, kinase-activating pseudokinase 1 [Source:NCBI gene (formerly Entrezgene);Acc:533821]	PRAG1	1.88189	1.88248	5.38256	3.64e-06	6.32e-05
ENSBTAG00000019350	513423	solute carrier family 25 member 21 [Source:VGNC Symbol;Acc:VGNC:34749]	SLC25A21	-1.75524	-1.76224	0.802529	1.91e-07	5.02e-06
ENSBTAG00000035998	516210	creatine kinase B [Source:VGNC Symbol;Acc:VGNC:27384]	CKB	1.58519	1.58642	3.9784	5.52e-06	8.98e-05
ENSBTAG00000054881	534778	renalase, FAD dependent amine oxidase [Source:NCBI gene (formerly Entrezgene);Acc:534778]	RNLS	-1.91602	-1.91882	2.31051	6.5e-09	3.1e-07
ENSBTAG00000002689	534611	NME/NM23 family member 7 [Source:VGNC Symbol;Acc:VGNC:32129]	NME7	-1.51521	-1.5157	4.35059	5.69e-08	1.88e-06
ENSBTAG00000003313	520341	TNF receptor superfamily member 9 [Source:VGNC Symbol;Acc:VGNC:36171]	TNFRSF9	4.24237	4.42137	-0.0814635	5.82e-07	1.31e-05
ENSBTAG00000037649	790124	vasoactive intestinal peptide receptor 2 [Source:VGNC Symbol;Acc:VGNC:36800]	VIPR2	-2.64862	-2.65814	1.24786	6.49e-08	2.1e-06
ENSBTAG00000004594	286794	matrix metallopeptidase 7 [Source:VGNC Symbol;Acc:VGNC:31529]	MMP7	3.01383	3.07851	0.153698	3.12e-06	5.49e-05
ENSBTAG00000010877	540812	armadillo repeat containing 12 [Source:VGNC Symbol;Acc:VGNC:26156]	ARMC12	-2.94104	-2.95072	1.53334	1.88e-08	7.58e-07
ENSBTAG00000007916	505891	forkhead box J1 [Source:VGNC Symbol;Acc:VGNC:29089]	FOXJ1	3.67537	3.76522	0.326281	7.52e-07	1.64e-05
ENSBTAG00000013596	540528	nuclear receptor subfamily 1 group H member 4 [Source:VGNC Symbol;Acc:VGNC:32232]	NR1H4	-2.22851	-2.23132	2.54009	9.88e-09	4.39e-07
ENSBTAG00000005716	493998	cellular retinoic acid binding protein 2 [Source:VGNC Symbol;Acc:VGNC:27686]	CRABP2	2.30118	2.31569	1.34986	1.34e-07	3.79e-06
ENSBTAG00000049001	#N/A	0	0	-1.70966	-1.71273	1.8586	7.63e-06	0.000117377
ENSBTAG00000000220	#N/A	NIMA related kinase 10 [Source:VGNC Symbol;Acc:VGNC:31992]	NEK10	-2.30066	-2.31641	0.272889	1.02e-07	3.05e-06
ENSBTAG00000001183	100141057	kelch like family member 33 [Source:VGNC Symbol;Acc:VGNC:30659]	KLHL33	-3.12735	-3.20362	-1.04814	2.28e-06	4.2e-05
ENSBTAG00000015080	515071	phosphatase and actin regulator 3 [Source:VGNC Symbol;Acc:VGNC:57015]	PHACTR3	1.45771	1.4642	1.42855	5.8e-05	0.000656443
ENSBTAG00000008143	513665	serine/threonine kinase 17a [Source:VGNC Symbol;Acc:VGNC:53673]	STK17A	1.72899	1.72926	6.12959	3.27e-09	1.83e-07
ENSBTAG00000012216	790225	mixed lineage kinase domain like pseudokinase [Source:VGNC Symbol;Acc:VGNC:31500]	MLKL	1.45517	1.45588	4.51324	6.77e-09	3.21e-07
ENSBTAG00000043548	#N/A	0	0	-3.79206	-3.87185	-0.614985	4.82e-07	1.11e-05
ENSBTAG00000007307	281484	selectin E [Source:VGNC Symbol;Acc:VGNC:34421]	SELE	5.23775	5.4214	1.21179	4.47e-09	2.32e-07
ENSBTAG00000050000	#N/A	0	0	-2.86471	-2.86576	4.66882	4.91e-10	4.1e-08
ENSBTAG00000003653	537667	Ly1 antibody reactive [Source:VGNC Symbol;Acc:VGNC:31095]	LYAR	1.34427	1.34454	5.77309	4.71e-09	2.42e-07
ENSBTAG00000014564	533703	xyloside xylosyltransferase 1 [Source:VGNC Symbol;Acc:VGNC:53613]	XXYLT1	-1.81184	-1.81238	4.59983	9.93e-11	1.19e-08
ENSBTAG00000045925	282182	Cbp/p300 interacting transactivator with Glu/Asp rich carboxy-terminal domain 1 [Source:VGNC Symbol;Acc:VGNC:27376]	CITED1	-2.94384	-2.95637	1.18633	1.77e-07	4.7e-06
ENSBTAG00000054383	616931	nudix (nucleoside diphosphate linked moiety X)-type motif 10 [Source:NCBI gene (formerly Entrezgene);Acc:616931]	NUDT10	4.12081	4.17661	1.21545	1.27e-06	2.57e-05
ENSBTAG00000018164	781806	fibronectin type III domain containing 4 [Source:VGNC Symbol;Acc:VGNC:29064]	FNDC4	1.05991	1.06095	3.28714	0.000359654	0.00316354
ENSBTAG00000006044	528668	kelch like family member 5 [Source:VGNC Symbol;Acc:VGNC:30668]	KLHL5	-1.65813	-1.65881	4.0635	5.2e-09	2.58e-07
ENSBTAG00000005633	616969	Rho guanine nucleotide exchange factor 28 [Source:VGNC Symbol;Acc:VGNC:26114]	ARHGEF28	-1.0095	-1.00987	4.33551	1.23e-05	0.000174317
ENSBTAG00000039711	538928	ZFP62 zinc finger protein [Source:VGNC Symbol;Acc:VGNC:37166]	ZFP62	-1.56327	-1.56449	3.15382	8.6e-07	1.85e-05
ENSBTAG00000017271	540206	microtubule associated serine/threonine kinase like [Source:VGNC Symbol;Acc:VGNC:31260]	MASTL	1.3406	1.34078	6.2953	8e-08	2.49e-06
ENSBTAG00000009258	614924	NIMA related kinase 11 [Source:VGNC Symbol;Acc:VGNC:53591]	NEK11	-3.23433	-3.32061	-1.16647	1.8e-05	0.000242561
ENSBTAG00000054069	100141268	cornulin [Source:NCBI gene (formerly Entrezgene);Acc:100141268]	CRNN	2.21231	2.22235	1.82529	4.07e-05	0.000484222
ENSBTAG00000039337	100295883	docosahexaenoic acid omega-hydroxylase CYP4F3 [Source:NCBI gene (formerly Entrezgene);Acc:100295883]	0	2.10696	2.11878	1.43112	9.99e-06	0.000146483
ENSBTAG00000016847	538936	ADP ribosylation factor like GTPase 4D [Source:VGNC Symbol;Acc:VGNC:26146]	ARL4D	-1.33837	-1.33861	5.34961	6.77e-10	5.23e-08
ENSBTAG00000038384	281268	keratin 5 [Source:VGNC Symbol;Acc:VGNC:50405]	KRT5	1.1993	1.20128	2.60568	9.31e-05	0.000988958
ENSBTAG00000007773	282118	vascular cell adhesion molecule 1 [Source:NCBI gene (formerly Entrezgene);Acc:282118]	VCAM1	-2.37423	-2.41383	-1.03465	0.000394274	0.00343559
ENSBTAG00000010798	505492	solute carrier family 23 member 1 [Source:VGNC Symbol;Acc:VGNC:34733]	SLC23A1	1.77551	1.77817	2.99282	4.38e-05	0.000518486
ENSBTAG00000003432	530271	zonadhesin [Source:VGNC Symbol;Acc:VGNC:99806]	ZAN	2.98367	3.03543	0.728639	5.81e-06	9.38e-05
ENSBTAG00000031778	519935	H2B clustered histone 5 [Source:VGNC Symbol;Acc:VGNC:83560]	H2BC5	-1.80161	-1.81269	0.26304	4.39e-05	0.000519297
ENSBTAG00000051882	616962	chromosome 16 C1orf105 homolog [Source:NCBI gene (formerly Entrezgene);Acc:616962]	C16H1orf105	-2.1297	-2.14664	-0.00529875	2.21e-06	4.12e-05
ENSBTAG00000012405	787112	platelet endothelial aggregation receptor 1 [Source:VGNC Symbol;Acc:VGNC:32734]	PEAR1	1.19292	1.19358	4.31555	0.000107103	0.00111351
ENSBTAG00000008320	615408	septin 5 [Source:VGNC Symbol;Acc:VGNC:53921]	SEPTIN5	1.33201	1.33261	4.77249	0.000127727	0.00129797
ENSBTAG00000030881	614796	transmembrane protein 260 [Source:VGNC Symbol;Acc:VGNC:36069]	TMEM260	-1.35752	-1.35775	5.32354	2.39e-09	1.45e-07
ENSBTAG00000004066	511595	poly(ADP-ribose) polymerase family member 8 [Source:NCBI gene (formerly Entrezgene);Acc:511595]	PARP8	-0.987287	-0.987494	5.00952	7.2e-06	0.000111965
ENSBTAG00000018497	532333	caveolae associated protein 2 [Source:VGNC Symbol;Acc:VGNC:26803]	CAVIN2	2.06848	2.06918	5.32507	3.82e-07	9.11e-06
ENSBTAG00000016784	517781	dynein axonemal heavy chain 7 [Source:VGNC Symbol;Acc:VGNC:50052]	DNAH7	-2.02439	-2.03528	0.404319	1.38e-06	2.74e-05
ENSBTAG00000006797	520348	membrane associated ring-CH-type finger 3 [Source:VGNC Symbol;Acc:VGNC:31239]	MARCHF3	1.55777	1.55835	4.86611	3.65e-09	2e-07
ENSBTAG00000019592	541084	methyl-CpG binding domain protein 5 [Source:VGNC Symbol;Acc:VGNC:31277]	MBD5	-1.46033	-1.46081	4.37418	1.27e-09	8.49e-08
ENSBTAG00000003165	537051	ADAM metallopeptidase with thrombospondin type 1 motif 9 [Source:VGNC Symbol;Acc:VGNC:25630]	ADAMTS9	-2.06629	-2.06648	6.40085	8.61e-11	1.08e-08
ENSBTAG00000011182	614675	PDZ and LIM domain 1 [Source:VGNC Symbol;Acc:VGNC:32707]	PDLIM1	1.18256	1.18259	8.42733	6.36e-09	3.06e-07
ENSBTAG00000047930	784326	ubiquitin conjugating enzyme E2 E2 [Source:NCBI gene (formerly Entrezgene);Acc:784326]	UBE2E2	-2.01209	-2.01511	2.28056	1.59e-07	4.38e-06
ENSBTAG00000006972	506746	thyroid hormone receptor interactor 13 [Source:VGNC Symbol;Acc:VGNC:36359]	TRIP13	1.26171	1.26189	6.19805	5.46e-08	1.83e-06
ENSBTAG00000002188	618703	chromosome 25 C16orf89 homolog [Source:VGNC Symbol;Acc:VGNC:58591]	C25H16orf89	4.38513	4.42867	2.41878	4e-08	1.41e-06
ENSBTAG00000002313	281878	inositol 1,4,5-trisphosphate receptor type 2 [Source:VGNC Symbol;Acc:VGNC:30347]	ITPR2	-2.15029	-2.15139	3.88902	1.11e-08	4.9e-07
ENSBTAG00000007605	508535	FKBP prolyl isomerase 4 [Source:VGNC Symbol;Acc:VGNC:29023]	FKBP4	1.28375	1.28387	6.82427	7.18e-08	2.31e-06
ENSBTAG00000020802	100847355	dynein axonemal heavy chain 12 [Source:NCBI gene (formerly Entrezgene);Acc:100847355]	DNAH12	-1.88235	-1.88537	2.1571	2.19e-08	8.47e-07
ENSBTAG00000002430	513804	collagen type XVII alpha 1 chain [Source:VGNC Symbol;Acc:VGNC:27558]	COL17A1	2.89866	2.89931	6.35762	1.51e-05	0.000208249
ENSBTAG00000045498	531192	sulfotransferase family 2B member 1 [Source:VGNC Symbol;Acc:VGNC:35468]	SULT2B1	-2.11761	-2.13143	0.202673	2.06e-05	0.00027112
ENSBTAG00000055281	100848357	uncharacterized LOC100848357 [Source:NCBI gene (formerly Entrezgene);Acc:100848357]	0	-1.78125	-1.78373	2.41736	4.4e-08	1.51e-06
ENSBTAG00000020233	535781	coiled-coil domain containing 186 [Source:VGNC Symbol;Acc:VGNC:26881]	CCDC186	-1.34403	-1.34423	5.58906	1.75e-08	7.11e-07
ENSBTAG00000043577	3283886	NADH dehydrogenase subunit 4 [Source:NCBI gene (formerly Entrezgene);Acc:3283886]	ND4	-1.66002	-1.66002	11.8082	1.66e-10	1.78e-08
ENSBTAG00000000182	507484	serine peptidase inhibitor, Kunitz type 2 [Source:VGNC Symbol;Acc:VGNC:49973]	SPINT2	-1.40561	-1.40572	6.41417	1.7e-10	1.79e-08
ENSBTAG00000009617	282356	solute carrier family 2 member 1 [Source:VGNC Symbol;Acc:VGNC:34796]	SLC2A1	1.41875	1.4215	2.71762	8.18e-06	0.000124429
ENSBTAG00000050389	#N/A	0	0	-2.53727	-2.59589	-1.23354	2.07e-05	0.000272081
ENSBTAG00000039050	282638	purinergic receptor P2Y2 [Source:VGNC Symbol;Acc:VGNC:32528]	P2RY2	1.89119	1.89221	4.66456	2.94e-07	7.28e-06
ENSBTAG00000035437	539234	stromal antigen 1 [Source:VGNC Symbol;Acc:VGNC:35353]	STAG1	-1.43999	-1.44027	5.11402	7.65e-09	3.56e-07
ENSBTAG00000007783	510420	MYB proto-oncogene like 2 [Source:VGNC Symbol;Acc:VGNC:31779]	MYBL2	1.39685	1.39697	7.03236	8.75e-05	0.00093954
ENSBTAG00000004720	535166	sulfatase 1 [Source:VGNC Symbol;Acc:VGNC:53880]	SULF1	-1.65148	-1.65161	6.54954	1.39e-10	1.58e-08
ENSBTAG00000009972	281254	inhibin subunit alpha [Source:VGNC Symbol;Acc:VGNC:30199]	INHA	2.85919	3.02291	-0.713485	0.00101531	0.00781241
ENSBTAG00000023947	614488	arginine vasopressin induced 1 [Source:VGNC Symbol;Acc:VGNC:26357]	AVPI1	1.50229	1.50316	4.402	7.66e-06	0.000117632
ENSBTAG00000043948	538255	hyperpolarization activated cyclic nucleotide gated potassium channel 1 [Source:VGNC Symbol;Acc:VGNC:29776]	HCN1	-1.75149	-1.76219	0.270303	0.000137694	0.00138513
ENSBTAG00000016484	529689	ATPase phospholipid transporting 11C [Source:VGNC Symbol;Acc:VGNC:26275]	ATP11C	-1.47925	-1.48016	3.48274	7.32e-08	2.34e-06
ENSBTAG00000012004	538957	transforming growth factor beta 3 [Source:VGNC Symbol;Acc:VGNC:35803]	TGFB3	-1.53958	-1.54005	4.6587	3.42e-08	1.24e-06
ENSBTAG00000052352	#N/A	0	0	2.84799	2.94839	-0.0929149	7.71e-05	0.000836572
ENSBTAG00000003074	529171	solute carrier family 16 member 6 [Source:VGNC Symbol;Acc:VGNC:34692]	SLC16A6	1.94381	1.94763	2.90977	8.5e-07	1.83e-05
ENSBTAG00000009125	507093	aldehyde dehydrogenase 1 family member A3 [Source:VGNC Symbol;Acc:VGNC:59168]	ALDH1A3	-1.07539	-1.07548	6.31917	6.9e-05	0.000763569
ENSBTAG00000000401	618203	tetratricopeptide repeat domain 24 [Source:VGNC Symbol;Acc:VGNC:36463]	TTC24	3.09927	3.22667	-0.536613	0.000147148	0.00145661
ENSBTAG00000018236	530941	erythrocyte membrane protein band 4.1 like 5 [Source:VGNC Symbol;Acc:VGNC:28525]	EPB41L5	-1.14011	-1.14065	3.85963	5.19e-05	0.000598893
ENSBTAG00000025748	507016	cytochrome P450, family 4, subfamily F, polypeptide 2 [Source:NCBI gene (formerly Entrezgene);Acc:507016]	CYP4F2	5.26679	5.45054	1.05688	3.35e-08	1.23e-06
ENSBTAG00000049306	618441	methionine sulfoxide reductase B1 [Source:NCBI gene (formerly Entrezgene);Acc:618441]	MSRB1	1.48381	1.48398	6.53719	9.7e-06	0.000143277
ENSBTAG00000006939	512950	FYVE, RhoGEF and PH domain containing 3 [Source:VGNC Symbol;Acc:VGNC:28966]	FGD3	1.84597	1.85873	0.995123	0.000125091	0.00127708
ENSBTAG00000005110	519444	calcium dependent secretion activator 2 [Source:VGNC Symbol;Acc:VGNC:26699]	CADPS2	-4.26093	-4.49268	-1.48722	7.56e-06	0.000116625
ENSBTAG00000015347	539337	Wnt family member 10B [Source:VGNC Symbol;Acc:VGNC:56232]	WNT10B	1.30624	1.30792	3.01343	3.32e-06	5.84e-05
ENSBTAG00000000815	512798	EPH receptor A2 [Source:VGNC Symbol;Acc:VGNC:28534]	EPHA2	1.59063	1.59077	7.17436	8.84e-07	1.89e-05
ENSBTAG00000038662	508454	gap junction protein beta 6 [Source:VGNC Symbol;Acc:VGNC:29381]	GJB6	2.8545	2.8653	2.09558	1.85e-05	0.000247974
ENSBTAG00000007181	539231	kinesin family member C3 [Source:VGNC Symbol;Acc:VGNC:30613]	KIFC3	1.68326	1.68421	4.60752	1.02e-05	0.000148952
ENSBTAG00000013764	404034	opticin [Source:VGNC Symbol;Acc:VGNC:32441]	OPTC	-3.23993	-3.32627	-1.18079	1.44e-05	0.00019954
ENSBTAG00000048114	100848331	retinoic acid early transcript 1E-like [Source:NCBI gene (formerly Entrezgene);Acc:100848331]	0	1.67758	1.67876	4.12864	5.98e-07	1.34e-05
ENSBTAG00000053433	112443864	MHC class I polypeptide-related sequence B-like [Source:NCBI gene (formerly Entrezgene);Acc:112443864]	0	2.43443	2.45881	0.921089	1.26e-06	2.57e-05
ENSBTAG00000016650	615392	TP53 induced glycolysis regulatory phosphatase [Source:VGNC Symbol;Acc:VGNC:35863]	TIGAR	1.32649	1.32736	3.99552	4.22e-07	9.97e-06
ENSBTAG00000050737	#N/A	0	0	4.18009	4.44025	-0.279084	2.39e-07	6.04e-06
ENSBTAG00000013085	281752	chymotrypsin-like elastase family, member 3B [Source:NCBI gene (formerly Entrezgene);Acc:281752]	CELA3B	4.51123	4.77426	0.0621547	4.65e-05	0.000547679
ENSBTAG00000010727	615657	autophagy related 4D cysteine peptidase [Source:VGNC Symbol;Acc:VGNC:26260]	ATG4D	1.98659	1.98744	5.13371	1.75e-06	3.37e-05
ENSBTAG00000004155	511363	spermatogenesis associated 20 [Source:VGNC Symbol;Acc:VGNC:35179]	SPATA20	1.69454	1.69476	6.71431	4.63e-07	1.07e-05
ENSBTAG00000001618	516866	alpha kinase 3 [Source:VGNC Symbol;Acc:VGNC:25849]	ALPK3	1.36859	1.3699	3.63146	3.85e-05	0.000461887
ENSBTAG00000014560	519165	H2.0 like homeobox [Source:VGNC Symbol;Acc:VGNC:50277]	HLX	-1.94822	-1.94994	3.08646	2.01e-08	7.95e-07
ENSBTAG00000000942	535132	signal induced proliferation associated 1 like 2 [Source:VGNC Symbol;Acc:VGNC:34629]	SIPA1L2	-2.69756	-2.70472	1.74425	3.96e-10	3.48e-08
ENSBTAG00000009942	510408	phospholipase C like 2 [Source:VGNC Symbol;Acc:VGNC:32992]	PLCL2	-2.94476	-2.95569	1.36839	6.7e-09	3.19e-07
ENSBTAG00000008228	504789	BEN domain containing 6 [Source:VGNC Symbol;Acc:VGNC:26469]	BEND6	-2.73483	-2.77649	-0.726587	7.4e-06	0.00011419
ENSBTAG00000003018	515367	follistatin like 3 [Source:VGNC Symbol;Acc:VGNC:29136]	FSTL3	1.47206	1.47215	7.54967	3e-05	0.000372898
ENSBTAG00000007417	540517	growth differentiation factor 11 [Source:VGNC Symbol;Acc:VGNC:29300]	GDF11	2.13612	2.14744	1.58667	2.59e-06	4.72e-05
ENSBTAG00000006703	515331	prostaglandin D2 receptor [Source:VGNC Symbol;Acc:VGNC:33499]	PTGDR	2.05478	2.05741	3.49565	4.42e-08	1.51e-06
ENSBTAG00000023416	787607	protein phosphatase 2 regulatory subunit B''alpha [Source:VGNC Symbol;Acc:VGNC:33258]	PPP2R3A	-1.48632	-1.48654	5.51219	2.14e-08	8.3e-07
ENSBTAG00000008331	509773	transmembrane protein 54 [Source:VGNC Symbol;Acc:VGNC:36097]	TMEM54	1.50337	1.51009	1.48026	7.43e-05	0.000813517
ENSBTAG00000054953	#N/A	0	0	3.75883	3.8922	-0.0906538	8.57e-06	0.000128945
ENSBTAG00000021210	516433	hes family bHLH transcription factor 2 [Source:VGNC Symbol;Acc:VGNC:29819]	HES2	1.69021	1.69057	5.82227	8.62e-08	2.63e-06
ENSBTAG00000005198	281160	fibroblast growth factor 1 [Source:VGNC Symbol;Acc:VGNC:28970]	FGF1	1.21505	1.21652	2.88268	1.41e-05	0.000196647
ENSBTAG00000040053	100296004	myosin heavy chain 6 [Source:VGNC Symbol;Acc:VGNC:55126]	MYH6	2.12273	2.14833	0.583096	9.23e-05	0.000983254
ENSBTAG00000005260	281499	secreted phosphoprotein 1 [Source:VGNC Symbol;Acc:VGNC:35232]	SPP1	2.8185	2.81898	6.95062	3.97e-07	9.45e-06
ENSBTAG00000001279	509346	membrane palmitoylated protein 2 [Source:VGNC Symbol;Acc:VGNC:31583]	MPP2	1.95213	1.95566	2.81894	4.45e-06	7.44e-05
ENSBTAG00000003496	614409	androgen induced 1 [Source:VGNC Symbol;Acc:VGNC:25764]	AIG1	-2.41488	-2.42449	1.06569	1.65e-07	4.51e-06
ENSBTAG00000045835	112442653	homeobox B5 [Source:VGNC Symbol;Acc:VGNC:58381]	HOXB5	-1.92432	-1.92974	1.46692	1.26e-07	3.63e-06
ENSBTAG00000053478	112449602	uncharacterized LOC112449602 [Source:NCBI gene (formerly Entrezgene);Acc:112449602]	0	-1.69402	-1.69589	2.74457	1.43e-07	3.98e-06
ENSBTAG00000000582	512743	lymphocyte antigen 6 complex, locus G6E [Source:NCBI gene (formerly Entrezgene);Acc:512743]	LY6G6E	1.3308	1.33124	5.1155	6.08e-07	1.35e-05
ENSBTAG00000048257	534967	leukotriene-B(4) omega-hydroxylase 2-like [Source:NCBI gene (formerly Entrezgene);Acc:534967]	0	2.02329	2.02521	3.81284	2.04e-06	3.85e-05
ENSBTAG00000016305	521728	ATPase 13A4 [Source:VGNC Symbol;Acc:VGNC:26280]	ATP13A4	1.18521	1.18705	2.62642	0.000244068	0.00224539
ENSBTAG00000010236	528834	cell death inducing DFFA like effector b [Source:VGNC Symbol;Acc:VGNC:27364]	CIDEB	2.42722	2.4381	2.08107	4.8e-07	1.11e-05
ENSBTAG00000011437	100337254	salt inducible kinase 1 [Source:NCBI gene (formerly Entrezgene);Acc:100337254]	0	1.48439	1.48472	5.8132	2.22e-07	5.69e-06
ENSBTAG00000019062	539601	FCH and double SH3 domains 2 [Source:VGNC Symbol;Acc:VGNC:28937]	FCHSD2	-1.54903	-1.54961	4.24563	2.51e-09	1.5e-07
ENSBTAG00000026384	616037	zygote arrest 1 like [Source:NCBI gene (formerly Entrezgene);Acc:616037]	ZAR1L	-1.50541	-1.50894	1.53648	1.19e-05	0.00016981
ENSBTAG00000007431	519047	cell migration inducing hyaluronidase 1 [Source:VGNC Symbol;Acc:VGNC:27172]	CEMIP	1.49274	1.49321	5.03059	1.38e-05	0.000193045
ENSBTAG00000049392	104968444	tumor necrosis factor receptor superfamily member 10B-like [Source:NCBI gene (formerly Entrezgene);Acc:104968444]	0	1.55833	1.55921	4.37072	1.85e-07	4.9e-06
ENSBTAG00000017602	510305	transmembrane protein 45B [Source:VGNC Symbol;Acc:VGNC:36089]	TMEM45B	3.06439	3.09361	0.954248	1.73e-07	4.65e-06
ENSBTAG00000000477	444870	toll like receptor 5 [Source:VGNC Symbol;Acc:VGNC:52835]	TLR5	-2.7868	-2.84242	-0.991769	3.98e-06	6.79e-05
ENSBTAG00000018774	518632	0	0	1.30311	1.3033	6.16695	7.96e-08	2.49e-06
ENSBTAG00000015700	539782	ELOVL fatty acid elongase 3 [Source:VGNC Symbol;Acc:VGNC:28449]	ELOVL3	5.14509	5.63728	-0.450583	1.3e-06	2.63e-05
ENSBTAG00000048950	510707	Bos taurus UL16-binding protein 15 (ULBP15), mRNA. [Source:RefSeq mRNA;Acc:NM_001168611]	ULBP13	1.70891	1.71031	3.90349	2.62e-08	9.97e-07
ENSBTAG00000014878	338086	cytochrome c oxidase subunit 7A1 [Source:VGNC Symbol;Acc:VGNC:27639]	COX7A1	-1.65636	-1.66157	1.17614	2.57e-06	4.69e-05
ENSBTAG00000010402	404108	myosin heavy chain 9 [Source:VGNC Symbol;Acc:VGNC:31798]	MYH9	1.03472	1.03473	9.98822	0.000313585	0.00280376
ENSBTAG00000008366	536456	SH3 and cysteine rich domain 2 [Source:VGNC Symbol;Acc:VGNC:35351]	STAC2	2.90042	2.91025	2.71841	3.42e-06	6e-05
ENSBTAG00000014960	535716	schwannomin interacting protein 1 [Source:NCBI gene (formerly Entrezgene);Acc:535716]	SCHIP1	1.18003	1.18028	5.39557	2.84e-06	5.1e-05
ENSBTAG00000014027	539023	tripartite motif containing 36 [Source:VGNC Symbol;Acc:VGNC:36331]	TRIM36	2.29545	2.30006	3.03364	8.79e-09	4.02e-07
ENSBTAG00000000283	281094	colony stimulating factor 1 [Source:VGNC Symbol;Acc:VGNC:27753]	CSF1	1.25385	1.25395	7.10891	1.79e-05	0.000242047
ENSBTAG00000013439	531741	Rho guanine nucleotide exchange factor 26 [Source:VGNC Symbol;Acc:VGNC:26113]	ARHGEF26	-2.03571	-2.03685	3.74507	1.1e-09	7.71e-08
ENSBTAG00000003144	617013	KIAA0825 [Source:VGNC Symbol;Acc:VGNC:30556]	KIAA0825	-1.23448	-1.23579	2.64083	0.000177696	0.00171216
ENSBTAG00000022751	789632	zinc finger CW-type and PWWP domain containing 2 [Source:NCBI gene (formerly Entrezgene);Acc:789632]	0	-2.24244	-2.2735	-0.77887	2.54e-05	0.000325951
ENSBTAG00000030189	#N/A	EF-hand calcium binding domain 6 [Source:VGNC Symbol;Acc:VGNC:28346]	EFCAB6	-1.79622	-1.81144	-0.158095	4.06e-05	0.000484013
ENSBTAG00000001335	280805	growth hormone receptor [Source:VGNC Symbol;Acc:VGNC:50184]	GHR	-1.73891	-1.73946	4.43616	5.52e-08	1.84e-06
ENSBTAG00000013909	512018	BOC cell adhesion associated, oncogene regulated [Source:VGNC Symbol;Acc:VGNC:26536]	BOC	-2.09985	-2.10122	3.58153	3.89e-08	1.39e-06
ENSBTAG00000001444	282654	tenascin XB [Source:VGNC Symbol;Acc:VGNC:36211]	TNXB	1.39463	1.39478	6.59594	0.000532483	0.00448684
ENSBTAG00000003871	504769	cytochrome P450 subfamily 2B [Source:NCBI gene (formerly Entrezgene);Acc:504769]	CYP2B6	-2.35789	-2.37037	0.554971	3.95e-07	9.41e-06
ENSBTAG00000051116	100295626	chromosome 23 C6orf132 homolog [Source:VGNC Symbol;Acc:VGNC:53962]	C23H6orf132	2.73143	2.75179	1.51217	9.61e-08	2.9e-06
ENSBTAG00000003014	507664	transient receptor potential cation channel subfamily V member 2 [Source:VGNC Symbol;Acc:VGNC:36398]	TRPV2	2.80107	2.8847	-0.513656	1.16e-05	0.000165957
ENSBTAG00000019665	281860	interleukin 1 receptor antagonist [Source:VGNC Symbol;Acc:VGNC:30136]	IL1RN	1.78804	1.79516	1.61521	7.65e-05	0.000833693
ENSBTAG00000011446	614707	semaphorin 7A [Source:VGNC Symbol;Acc:VGNC:53952]	SEMA7A	1.2401	1.24343	2.0865	0.00213209	0.0147738
ENSBTAG00000046980	100848657	killer cell lectin like receptor F2 [Source:VGNC Symbol;Acc:VGNC:30686]	KLRF2	5.92892	144269483	-0.759229	4.03e-06	6.86e-05
ENSBTAG00000043559	3283885	NADH dehydrogenase subunit 4L [Source:NCBI gene (formerly Entrezgene);Acc:3283885]	ND4L	-1.6629	-1.66293	8.6056	1.01e-09	7.25e-08
ENSBTAG00000017067	513878	BUD23 rRNA methyltransferase and ribosome maturation factor [Source:VGNC Symbol;Acc:VGNC:26608]	BUD23	1.2092	1.20931	6.90253	2.88e-08	1.09e-06
ENSBTAG00000026025	519208	fibronectin type III domain containing protein 3C1 [Source:NCBI gene (formerly Entrezgene);Acc:519208]	0	-3.83138	-3.94975	-1.03499	3.63e-06	6.32e-05
ENSBTAG00000018010	281584	ATP binding cassette subfamily A member 4 [Source:VGNC Symbol;Acc:VGNC:25458]	ABCA4	-1.51234	-1.51424	2.58465	2.13e-07	5.51e-06
ENSBTAG00000052443	#N/A	0	0	1.88389	1.89233	1.76176	0.000226777	0.00210866
ENSBTAG00000002888	100337258	transmembrane O-mannosyltransferase targeting cadherins 2 [Source:VGNC Symbol;Acc:VGNC:58451]	TMTC2	-1.12529	-1.12553	4.95189	5.15e-05	0.000595423
ENSBTAG00000016514	280753	carboxypeptidase E [Source:VGNC Symbol;Acc:VGNC:27648]	CPE	-1.46527	-1.4653	8.38468	4.17e-09	2.2e-07
ENSBTAG00000031575	521961	vav guanine nucleotide exchange factor 3 [Source:VGNC Symbol;Acc:VGNC:36774]	VAV3	-1.53269	-1.53325	4.17393	1.06e-07	3.14e-06
ENSBTAG00000021490	508051	WD repeat domain 4 [Source:VGNC Symbol;Acc:VGNC:36897]	WDR4	1.47473	1.47687	3.14289	1.27e-05	0.000179281
ENSBTAG00000002464	514590	phospholipase C eta 2 [Source:VGNC Symbol;Acc:VGNC:32991]	PLCH2	2.02802	2.02913	4.74844	0.000183138	0.00175422
ENSBTAG00000010135	507694	plasmanylethanolamine desaturase 1 [Source:VGNC Symbol;Acc:VGNC:57030]	PEDS1	1.16754	1.16768	6.42706	9.47e-05	0.00100403
ENSBTAG00000011245	518168	plexin C1 [Source:VGNC Symbol;Acc:VGNC:33064]	PLXNC1	-2.06894	-2.10631	-1.14624	0.000179139	0.00172225
ENSBTAG00000011964	519222	DIS3 like 3'-5' exoribonuclease 2 [Source:VGNC Symbol;Acc:VGNC:28074]	DIS3L2	-1.78705	-1.78835	3.34367	1.75e-10	1.82e-08
ENSBTAG00000019876	281127	desmocollin 1 [Source:VGNC Symbol;Acc:VGNC:28212]	DSC1	-3.40836	-3.47869	-0.761413	3.67e-06	6.37e-05
ENSBTAG00000047059	509797	translocase of inner mitochondrial membrane 17A [Source:VGNC Symbol;Acc:VGNC:49572]	TIMM17A	1.27551	1.27582	5.46403	1.46e-07	4.05e-06
ENSBTAG00000009127	508104	TSPY like 4 [Source:VGNC Symbol;Acc:VGNC:36446]	TSPYL4	-1.16838	-1.1685	6.02746	9.07e-07	1.93e-05
ENSBTAG00000048367	#N/A	0	0	-2.54572	-2.57409	-0.255458	2.57e-06	4.7e-05
ENSBTAG00000031354	#N/A	0	0	3.64448	3.81866	-0.579256	0.000137912	0.00138593
ENSBTAG00000014791	539159	cystathionine gamma-lyase [Source:VGNC Symbol;Acc:VGNC:27795]	CTH	1.35714	1.35773	4.49199	2.23e-07	5.7e-06
ENSBTAG00000002951	513468	CD244 molecule [Source:VGNC Symbol;Acc:VGNC:27015]	CD244	3.00008	3.0139	2.27845	2.42e-08	9.26e-07
ENSBTAG00000034393	512887	family with sequence similarity 149 member A [Source:VGNC Symbol;Acc:VGNC:55045]	FAM149A	1.28202	1.28307	3.63931	4.31e-07	1.01e-05
ENSBTAG00000004894	505013	GTPase, IMAP family member 5 [Source:NCBI gene (formerly Entrezgene);Acc:505013]	GIMAP5	2.4441	2.49253	-0.116774	2.74e-05	0.000346796
ENSBTAG00000000928	506538	sperm antigen with calponin homology and coiled-coil domains 1 [Source:VGNC Symbol;Acc:VGNC:35200]	SPECC1	1.02916	1.02969	4.23207	0.000350024	0.00308979
ENSBTAG00000051083	789600	Wnt family member 4 [Source:VGNC Symbol;Acc:VGNC:36959]	WNT4	-1.73683	-1.73777	3.7379	3.03e-06	5.36e-05
ENSBTAG00000016471	286844	pyruvate dehydrogenase phosphatase regulatory subunit [Source:VGNC Symbol;Acc:VGNC:32715]	PDPR	-1.44429	-1.44476	4.46113	5.1e-08	1.73e-06
ENSBTAG00000034875	524375	alpha kinase 1 [Source:VGNC Symbol;Acc:VGNC:25847]	ALPK1	-1.62673	-1.62809	3.05306	5.97e-09	2.9e-07
ENSBTAG00000013300	282573	potassium calcium-activated channel subfamily M alpha 1 [Source:VGNC Symbol;Acc:VGNC:30479]	KCNMA1	-1.74262	-1.74329	4.21184	6.13e-08	2.01e-06
ENSBTAG00000012022	535927	TBC1 domain family member 2B [Source:VGNC Symbol;Acc:VGNC:35640]	TBC1D2B	-1.48376	-1.48386	6.66179	2.41e-09	1.45e-07
ENSBTAG00000007436	613919	gamma-glutamyltransferase 6 [Source:VGNC Symbol;Acc:VGNC:29345]	GGT6	1.31508	1.3183	2.20064	0.000866531	0.0068497
ENSBTAG00000005069	282384	transmembrane 7 superfamily member 2 [Source:VGNC Symbol;Acc:VGNC:35910]	TM7SF2	2.07995	2.08067	5.41922	1.2e-07	3.49e-06
ENSBTAG00000019349	282365	solute carrier family 6 member 4 [Source:VGNC Symbol;Acc:VGNC:49971]	SLC6A4	-2.32119	-2.34036	0.0337339	1.75e-06	3.37e-05
ENSBTAG00000021547	521560	cilia and flagella associated protein 57 [Source:VGNC Symbol;Acc:VGNC:54907]	CFAP57	1.72398	1.72905	1.99494	9.93e-05	0.00104596
ENSBTAG00000015436	514427	solute carrier family 27 member 4 [Source:VGNC Symbol;Acc:VGNC:34788]	SLC27A4	1.85111	1.85376	3.37011	9.63e-07	2.03e-05
ENSBTAG00000000011	511957	L-threonine dehydrogenase [Source:NCBI gene (formerly Entrezgene);Acc:511957]	TDH	3.04263	3.12839	-0.220286	8.84e-07	1.89e-05
ENSBTAG00000005104	785213	alpha-1,6-mannosylglycoprotein 6-beta-N-acetylglucosaminyltransferase B [Source:VGNC Symbol;Acc:VGNC:55847]	MGAT5B	2.41929	2.42255	3.69237	5.36e-05	0.000614887
ENSBTAG00000008877	515571	amyloid beta precursor protein binding family A member 1 [Source:VGNC Symbol;Acc:VGNC:26000]	APBA1	-2.11095	-2.13624	-0.597721	3.61e-05	0.000437153
ENSBTAG00000049346	100336941	carcinoembryonic antigen-related cell adhesion molecule 4 [Source:NCBI gene (formerly Entrezgene);Acc:100336941]	0	5.50461	5.99942	0.135164	6.92e-06	0.000108343
ENSBTAG00000040512	100126444	Purkinje cell protein 4 like 1 [Source:VGNC Symbol;Acc:VGNC:32645]	PCP4L1	2.10211	2.1082	2.0983	2.46e-05	0.000315706
ENSBTAG00000020569	282608	calcium voltage-gated channel auxiliary subunit alpha2delta 1 [Source:VGNC Symbol;Acc:VGNC:26679]	CACNA2D1	-1.82567	-1.82679	3.52971	1.28e-07	3.66e-06
ENSBTAG00000005915	528635	Scm like with four mbt domains 2 [Source:VGNC Symbol;Acc:VGNC:34516]	SFMBT2	-2.51038	-2.53541	-0.142584	3.96e-06	6.79e-05
ENSBTAG00000000500	525027	PIN2 (TERF1) interacting telomerase inhibitor 1 [Source:VGNC Symbol;Acc:VGNC:32905]	PINX1	1.2622	1.2633	3.59281	4.18e-07	9.89e-06
ENSBTAG00000053114	107132283	endogenous retrovirus group K member 113 Env polyprotein-like [Source:NCBI gene (formerly Entrezgene);Acc:107132283]	0	-1.82819	-1.83358	1.34835	1.04e-06	2.16e-05
ENSBTAG00000030940	510988	GTPase, IMAP family member 7 [Source:NCBI gene (formerly Entrezgene);Acc:510988]	GIMAP7	1.67746	1.67987	2.99109	1.81e-07	4.8e-06
ENSBTAG00000026977	522188	protein tyrosine phosphatase receptor type Q [Source:VGNC Symbol;Acc:VGNC:33556]	PTPRQ	-2.75245	-2.77824	-0.0327778	1.77e-06	3.39e-05
ENSBTAG00000008313	407241	Kruppel like factor 15 [Source:VGNC Symbol;Acc:VGNC:30629]	KLF15	-2.37886	-2.39822	0.147873	3.27e-07	7.99e-06
ENSBTAG00000015615	540554	thymocyte selection associated [Source:VGNC Symbol;Acc:VGNC:35835]	THEMIS	-1.89593	-1.90434	0.733911	6.8e-07	1.5e-05
ENSBTAG00000005574	280750	clusterin [Source:NCBI gene (formerly Entrezgene);Acc:280750]	CLU	1.97707	1.97718	8.10268	2.21e-05	0.000288027
ENSBTAG00000003791	532829	lysophosphatidic acid receptor 3 [Source:VGNC Symbol;Acc:VGNC:30957]	LPAR3	-1.48875	-1.48889	6.154	4.91e-09	2.48e-07
ENSBTAG00000008940	513538	neuronal pentraxin 1 [Source:VGNC Symbol;Acc:VGNC:32218]	NPTX1	6.03848	6.53624	0.869455	1.42e-08	6.03e-07
ENSBTAG00000019052	511203	ankyrin 3 [Source:VGNC Symbol;Acc:VGNC:55032]	ANK3	-3.85428	-3.97273	-1.02276	6.61e-06	0.000105017
ENSBTAG00000000828	539360	calpain 6 [Source:VGNC Symbol;Acc:VGNC:26749]	CAPN6	-2.11491	-2.13391	-0.142318	4.23e-06	7.11e-05
ENSBTAG00000052715	#N/A	0	0	-1.31825	-1.31918	3.33108	4.89e-07	1.13e-05
ENSBTAG00000049641	100848511	ecto-NOX disulfide-thiol exchanger 2 [Source:NCBI gene (formerly Entrezgene);Acc:100848511]	ENOX2	-2.02389	-2.02669	2.41515	5.77e-08	1.9e-06
ENSBTAG00000010030	#N/A	EPH receptor A4 [Source:VGNC Symbol;Acc:VGNC:56106]	EPHA4	1.53621	1.53652	5.81769	4.81e-08	1.63e-06
ENSBTAG00000014920	535644	semaphorin 3E [Source:VGNC Symbol;Acc:VGNC:34430]	SEMA3E	1.16389	1.16499	3.1874	7.67e-05	0.000834642
ENSBTAG00000021934	614455	retinol saturase [Source:VGNC Symbol;Acc:VGNC:33881]	RETSAT	-1.23338	-1.23365	5.01098	2.5e-07	6.25e-06
ENSBTAG00000037721	#N/A	0	0	2.01684	2.02383	1.93001	0.000124984	0.00127699
ENSBTAG00000016327	531921	solute carrier family 28 member 2 [Source:VGNC Symbol;Acc:VGNC:34792]	SLC28A2	-1.64762	-1.66394	-0.40431	0.000129684	0.00131573
ENSBTAG00000016107	526175	phosphate cytidylyltransferase 1, choline, beta [Source:VGNC Symbol;Acc:VGNC:32653]	PCYT1B	1.2076	1.21473	0.885145	0.00438296	0.0274108
ENSBTAG00000020070	533151	ATP binding cassette subfamily C member 3 [Source:VGNC Symbol;Acc:VGNC:25473]	ABCC3	1.36283	1.3633	5.13032	9.88e-07	2.08e-05
ENSBTAG00000054367	508008	Wnt family member 5B [Source:NCBI gene (formerly Entrezgene);Acc:508008]	WNT5B	1.87761	1.89837	0.40952	0.000183643	0.00175653
ENSBTAG00000004989	615340	interferon regulatory factor 5 [Source:VGNC Symbol;Acc:VGNC:30276]	IRF5	1.1631	1.16416	3.58807	6.42e-05	0.000715327
ENSBTAG00000015095	517396	tetratricopeptide repeat domain 6 [Source:VGNC Symbol;Acc:VGNC:59372]	TTC6	-2.29203	-2.3336	-0.993618	0.000102474	0.00107396
ENSBTAG00000009443	404167	glucosaminyl (N-acetyl) transferase 3, mucin type [Source:NCBI gene (formerly Entrezgene);Acc:404167]	GCNT3	2.0316	2.0384	2.09485	0.000105266	0.00109704
ENSBTAG00000013054	512633	major facilitator superfamily domain containing 2A [Source:VGNC Symbol;Acc:VGNC:31435]	MFSD2A	1.35775	1.36112	2.31842	7.53e-05	0.000822087
ENSBTAG00000000277	281249	interleukin 18 [Source:VGNC Symbol;Acc:VGNC:30126]	IL18	1.4902	1.49026	7.96345	7.81e-07	1.7e-05
ENSBTAG00000001836	#N/A	0	0	1.70447	1.70717	2.9879	2.93e-06	5.23e-05
ENSBTAG00000020223	508394	calsequestrin 1 [Source:VGNC Symbol;Acc:VGNC:26786]	CASQ1	1.09971	1.10118	2.86551	2.93e-05	0.000366179
ENSBTAG00000016411	510037	ring finger protein 122 [Source:VGNC Symbol;Acc:VGNC:34015]	RNF122	1.04063	1.04094	5.03243	2.8e-05	0.000352953
ENSBTAG00000013535	507981	DNA fragmentation factor subunit alpha [Source:NCBI gene (formerly Entrezgene);Acc:507981]	DFFA	1.49973	1.49985	7.12745	4.13e-08	1.44e-06
ENSBTAG00000007121	504652	thymidine kinase 1 [Source:VGNC Symbol;Acc:VGNC:35884]	TK1	1.27356	1.27366	6.97895	1.57e-05	0.000215431
ENSBTAG00000005164	528871	granzyme K [Source:VGNC Symbol;Acc:VGNC:29733]	GZMK	6.63721	1.44269e+08	-0.187261	1.37e-06	2.73e-05
ENSBTAG00000021568	787487	von Willebrand factor C and EGF domains [Source:VGNC Symbol;Acc:VGNC:36859]	VWCE	2.58391	2.60388	1.49111	2.39e-07	6.04e-06
ENSBTAG00000011590	767905	GLI pathogenesis related 1 [Source:VGNC Symbol;Acc:VGNC:29402]	GLIPR1	2.42243	2.42879	2.49461	3.77e-05	0.000454485
ENSBTAG00000013148	414922	claudin 1 [Source:VGNC Symbol;Acc:VGNC:27402]	CLDN1	-1.31148	-1.3115	8.44666	1.83e-07	4.84e-06
ENSBTAG00000005524	515320	HMG-box transcription factor 1 [Source:VGNC Symbol;Acc:VGNC:29767]	HBP1	-1.16411	-1.16421	6.37351	2.26e-06	4.18e-05
ENSBTAG00000051575	787258	forkhead box E3 [Source:NCBI gene (formerly Entrezgene);Acc:787258]	FOXE3	2.4965	2.54094	-0.00868717	1.69e-05	0.000229689
ENSBTAG00000019741	540702	complement C3a receptor 1 [Source:VGNC Symbol;Acc:VGNC:26639]	C3AR1	3.92248	4.05696	0.598338	3.5e-07	8.46e-06
ENSBTAG00000016973	613506	serine protease 8 [Source:VGNC Symbol;Acc:VGNC:33426]	PRSS8	3.36675	3.53789	-0.242077	2.43e-05	0.000312585
ENSBTAG00000021151	317655	myosin heavy chain 10 [Source:VGNC Symbol;Acc:VGNC:31794]	MYH10	1.05655	1.05656	10.1974	3.5e-05	0.000426494
ENSBTAG00000002972	526444	cilia and flagella associated protein 94 [Source:VGNC Symbol;Acc:VGNC:99768]	CFAP94	-1.65847	-1.66246	1.52294	2.36e-06	4.34e-05
ENSBTAG00000004046	528508	deltex E3 ubiquitin ligase 4 [Source:VGNC Symbol;Acc:VGNC:54867]	DTX4	1.3544	1.35762	2.41224	0.000103735	0.00108195
ENSBTAG00000045879	101903708	calcium homeostasis modulator family member 5 [Source:VGNC Symbol;Acc:VGNC:26711]	CALHM5	3.3497	3.40313	0.588954	7.2e-06	0.000111965
ENSBTAG00000001102	510205	serpin family B member 10 [Source:VGNC Symbol;Acc:VGNC:56372]	SERPINB10	1.58489	1.58515	5.91893	1.44e-08	6.08e-07
ENSBTAG00000048781	#N/A	0	0	-1.5158	-1.51595	6.25312	3.97e-09	2.11e-07
ENSBTAG00000019069	513812	synaptogyrin 2 [Source:NCBI gene (formerly Entrezgene);Acc:513812]	SYNGR2	1.62811	1.62847	5.84574	8.82e-06	0.000132087
ENSBTAG00000004878	525741	CaM kinase like vesicle associated [Source:VGNC Symbol;Acc:VGNC:26728]	CAMKV	2.27267	2.28167	1.98888	9.19e-07	1.95e-05
ENSBTAG00000002981	540455	PICALM interacting mitotic regulator [Source:VGNC Symbol;Acc:VGNC:32902]	PIMREG	1.43194	1.43222	5.83677	2.25e-08	8.65e-07
ENSBTAG00000002878	509942	chordin [Source:VGNC Symbol;Acc:VGNC:27316]	CHRD	1.67512	1.67611	4.63661	0.000116932	0.00120513
ENSBTAG00000021015	784700	inhibitory synaptic factor 2A [Source:VGNC Symbol;Acc:VGNC:28775]	INSYN2A	2.22053	2.23574	1.04416	1.61e-05	0.000220674
ENSBTAG00000019513	617008	chromosome 11 C9orf50 homolog [Source:VGNC Symbol;Acc:VGNC:52622]	C11H9orf50	1.9101	1.91377	2.97628	5.86e-05	0.000660778
ENSBTAG00000004231	507389	glycoprotein M6A [Source:VGNC Symbol;Acc:VGNC:97275]	GPM6A	-1.49621	-1.49623	9.18452	9.88e-09	4.39e-07
ENSBTAG00000017655	509823	palmdelphin [Source:VGNC Symbol;Acc:VGNC:32560]	PALMD	-0.979347	-0.9816	1.60634	0.0151585	0.0793372
ENSBTAG00000017450	533510	kelch like family member 24 [Source:VGNC Symbol;Acc:VGNC:30652]	KLHL24	-1.41543	-1.41606	3.98887	5.09e-07	1.16e-05
ENSBTAG00000020632	519632	NAD(P)H quinone dehydrogenase 1 [Source:VGNC Symbol;Acc:VGNC:57053]	NQO1	-1.24647	-1.24674	4.92583	7.99e-07	1.74e-05
ENSBTAG00000043568	3283884	NADH dehydrogenase subunit 3 [Source:NCBI gene (formerly Entrezgene);Acc:3283884]	ND3	-1.55549	-1.5555	10.2698	5.26e-11	7.7e-09
ENSBTAG00000006039	327676	Rho GDP dissociation inhibitor beta [Source:VGNC Symbol;Acc:VGNC:26102]	ARHGDIB	-1.25158	-1.25807	0.440784	0.00165552	0.0118563
ENSBTAG00000033699	512928	cholinergic receptor muscarinic 4 [Source:VGNC Symbol;Acc:VGNC:54862]	CHRM4	2.75892	2.7952	0.714274	1.71e-05	0.000231607
ENSBTAG00000015618	618677	growth differentiation factor 15 [Source:VGNC Symbol;Acc:VGNC:29301]	GDF15	1.98447	1.98591	4.54047	3.89e-06	6.73e-05
ENSBTAG00000017043	509707	G protein-coupled receptor 1 [Source:VGNC Symbol;Acc:VGNC:29542]	GPR1	-2.93006	-2.9916	-0.979041	1.05e-05	0.000153011
ENSBTAG00000006618	516069	HLF transcription factor, PAR bZIP family member [Source:VGNC Symbol;Acc:VGNC:50275]	HLF	-2.67153	-2.68601	0.757987	1.33e-07	3.78e-06
ENSBTAG00000000218	100295732	mitogen-activated protein kinase kinase 5 [Source:VGNC Symbol;Acc:VGNC:31186]	MAP2K5	-1.24922	-1.24976	3.91246	5.18e-07	1.18e-05
ENSBTAG00000014645	100140960	contactin 2 [Source:VGNC Symbol;Acc:VGNC:27537]	CNTN2	1.67329	1.67805	2.05037	1.55e-05	0.000213265
ENSBTAG00000014465	281375	serpin family E member 1 [Source:VGNC Symbol;Acc:VGNC:34476]	SERPINE1	1.3686	1.36862	9.24305	0.000127734	0.00129797
ENSBTAG00000031658	527573	semaphorin 6B [Source:VGNC Symbol;Acc:VGNC:34442]	SEMA6B	1.64732	1.65004	3.02256	2.57e-05	0.000328894
ENSBTAG00000009419	525062	tripartite motif containing 29 [Source:VGNC Symbol;Acc:VGNC:36325]	TRIM29	3.64137	3.73103	0.351444	1.59e-05	0.00021847
ENSBTAG00000013801	540688	PBX homeobox 1 [Source:VGNC Symbol;Acc:VGNC:32607]	PBX1	-1.62108	-1.62155	4.5736	2.97e-09	1.7e-07
ENSBTAG00000002952	514352	T-box transcription factor 19 [Source:VGNC Symbol;Acc:VGNC:35665]	TBX19	-3.08404	-3.18096	-1.27234	1.78e-06	3.41e-05
ENSBTAG00000050852	513990	C-X-C motif chemokine ligand 9 [Source:NCBI gene (formerly Entrezgene);Acc:513990]	CXCL9	-1.4666	-1.46683	5.40124	5.92e-07	1.33e-05
ENSBTAG00000048939	#N/A	0	0	-1.28061	-1.28748	0.304002	0.000276231	0.00250763
ENSBTAG00000017839	#N/A	TIAM Rac1 associated GEF 1 [Source:VGNC Symbol;Acc:VGNC:56334]	TIAM1	-2.33125	-2.34117	0.892355	8.23e-07	1.78e-05
ENSBTAG00000007450	515440	complement C2 [Source:VGNC Symbol;Acc:VGNC:53959]	C2	-1.61832	-1.61877	4.70712	3.41e-07	8.29e-06
ENSBTAG00000012007	338437	suppressor of cytokine signaling 2 [Source:VGNC Symbol;Acc:VGNC:35120]	SOCS2	2.63446	2.66784	0.479995	7.32e-06	0.000113323
ENSBTAG00000008953	524959	transporter 1, ATP binding cassette subfamily B member [Source:VGNC Symbol;Acc:VGNC:35598]	TAP1	1.66798	1.66845	5.60084	3.25e-08	1.2e-06
ENSBTAG00000003595	614187	family with sequence similarity 216 member B [Source:VGNC Symbol;Acc:VGNC:28796]	FAM216B	-2.22687	-2.24515	0.0490186	1.11e-06	2.29e-05
ENSBTAG00000034693	281511	synaptotagmin 1 [Source:VGNC Symbol;Acc:VGNC:35535]	SYT1	-1.88674	-1.88691	6.30922	1.35e-08	5.73e-07
ENSBTAG00000008428	515029	uridine phosphorylase 1 [Source:VGNC Symbol;Acc:VGNC:36688]	UPP1	1.81404	1.84256	0.0916995	0.000162104	0.00158896
ENSBTAG00000019634	100137737	p53-induced death domain protein 1 [Source:VGNC Symbol;Acc:VGNC:32863]	PIDD1	1.46055	1.4621	3.64488	0.00098111	0.00759413
ENSBTAG00000004085	510538	anti-silencing function 1B histone chaperone [Source:VGNC Symbol;Acc:VGNC:50605]	ASF1B	0.918175	0.918333	5.78551	3.06e-05	0.000379313
ENSBTAG00000005151	527992	WD repeat containing planar cell polarity effector [Source:VGNC Symbol;Acc:VGNC:36879]	WDPCP	-1.60169	-1.60547	1.48834	1.97e-06	3.73e-05
ENSBTAG00000021949	281348	neurofilament light [Source:VGNC Symbol;Acc:VGNC:31986]	NEFL	3.93646	4.41257	-0.884515	0.000940588	0.00731962
ENSBTAG00000013923	281437	glutaminyl-peptide cyclotransferase [Source:VGNC Symbol;Acc:VGNC:33598]	QPCT	3.41194	3.58351	-0.365449	6.51e-06	0.00010422
ENSBTAG00000009545	504618	protein phosphatase with EF-hand domain 1 [Source:VGNC Symbol;Acc:VGNC:33190]	PPEF1	-2.64769	-2.66431	0.507573	8.04e-08	2.49e-06
ENSBTAG00000000400	528459	keratin 85 [Source:VGNC Symbol;Acc:VGNC:50410]	KRT85	2.43272	2.44412	1.99121	5.64e-07	1.27e-05
ENSBTAG00000001099	614601	PILR alpha associated neural protein [Source:VGNC Symbol;Acc:VGNC:32855]	PIANP	1.46343	1.46952	1.68992	0.000168642	0.00164685
ENSBTAG00000000536	509082	zinc finger protein 395 [Source:VGNC Symbol;Acc:VGNC:37266]	ZNF395	-1.45421	-1.45439	5.80555	1.25e-09	8.45e-08
ENSBTAG00000019867	534683	copper metabolism domain containing 1 [Source:VGNC Symbol;Acc:VGNC:27581]	COMMD1	-1.12167	-1.12204	4.29746	3.04e-05	0.000377127
ENSBTAG00000000246	525813	malic enzyme 3 [Source:VGNC Symbol;Acc:VGNC:31341]	ME3	-1.94443	-1.94898	1.71021	2.39e-09	1.45e-07
ENSBTAG00000049987	#N/A	0	0	-2.20501	-2.24597	-1.0164	0.000590002	0.0049143
ENSBTAG00000003794	281792	G protein subunit alpha o1 [Source:VGNC Symbol;Acc:VGNC:57047]	GNAO1	2.92271	2.99564	-0.147853	1.31e-05	0.000184625
ENSBTAG00000011451	532565	reticulon 1 [Source:VGNC Symbol;Acc:VGNC:34203]	RTN1	-1.74122	-1.74167	4.80353	1.14e-09	7.9e-08
ENSBTAG00000007566	529230	centrosomal protein 170 [Source:VGNC Symbol;Acc:VGNC:27197]	CEP170	-1.17948	-1.17954	7.21677	1.26e-06	2.57e-05
ENSBTAG00000004196	788992	formin like 1 [Source:VGNC Symbol;Acc:VGNC:29046]	FMNL1	1.29253	1.29336	4.03816	2.17e-05	0.000283583
ENSBTAG00000047161	100336572	arylsulfatase family member H [Source:VGNC Symbol;Acc:VGNC:50166]	ARSH	-1.52573	-1.5345	0.39713	0.000118236	0.00121664
ENSBTAG00000035995	786672	TNF alpha induced protein 2 [Source:VGNC Symbol;Acc:VGNC:53955]	TNFAIP2	1.89748	1.90772	1.55413	0.000173823	0.00168325
ENSBTAG00000020895	281904	lysyl oxidase like 4 [Source:VGNC Symbol;Acc:VGNC:55958]	LOXL4	1.57085	1.57751	1.37419	7.1e-05	0.000781726
ENSBTAG00000047532	100848801	triple QxxK/R motif containing [Source:VGNC Symbol;Acc:VGNC:36361]	TRIQK	-1.61989	-1.62095	3.37502	2.06e-07	5.37e-06
ENSBTAG00000000507	528390	nuclear receptor subfamily 4 group A member 1 [Source:VGNC Symbol;Acc:VGNC:32245]	NR4A1	1.79739	1.79998	3.67846	6.65e-06	0.000105397
ENSBTAG00000032206	767995	hemogen [Source:VGNC Symbol;Acc:VGNC:29807]	HEMGN	3.0839	3.11682	0.852979	7.61e-06	0.000117173
ENSBTAG00000006859	100336941	0	0	5.25767	5.75082	-0.284499	2.41e-06	4.43e-05
ENSBTAG00000009705	281386	serpin family F member 1 [Source:VGNC Symbol;Acc:VGNC:34478]	SERPINF1	-2.49935	-2.5145	0.554556	5.85e-07	1.31e-05
ENSBTAG00000006720	539491	gap junction protein alpha 5 [Source:VGNC Symbol;Acc:VGNC:29374]	GJA5	-1.6587	-1.65902	5.18921	1.45e-08	6.08e-07
ENSBTAG00000033510	540423	myelin protein zero like 2 [Source:VGNC Symbol;Acc:VGNC:31593]	MPZL2	1.11994	1.12037	4.55078	0.000810193	0.00645923
ENSBTAG00000017867	521410	yippee like 1 [Source:VGNC Symbol;Acc:VGNC:37034]	YPEL1	-2.20804	-2.21203	2.15587	6.11e-09	2.96e-07
ENSBTAG00000006726	526711	coiled-coil domain containing 102B [Source:VGNC Symbol;Acc:VGNC:56364]	CCDC102B	1.35997	1.36304	2.05685	1.8e-05	0.000242275
ENSBTAG00000007502	281692	creatine kinase, mitochondrial 1A [Source:NCBI gene (formerly Entrezgene);Acc:281692]	CKMT1A	2.04077	2.04301	3.50608	8.37e-05	0.000902779
ENSBTAG00000016963	540722	ADAM metallopeptidase with thrombospondin type 1 motif 6 [Source:VGNC Symbol;Acc:VGNC:25628]	ADAMTS6	-1.34849	-1.34889	4.61537	3.74e-05	0.000451178
ENSBTAG00000013505	#N/A	IQ motif containing with AAA domain 1 [Source:VGNC Symbol;Acc:VGNC:30248]	IQCA1	-3.397	-3.53431	-1.45771	3.23e-05	0.000397772
ENSBTAG00000039483	529902	desmoglein 3 [Source:VGNC Symbol;Acc:VGNC:28222]	DSG3	1.92365	1.93838	0.838923	2.14e-05	0.000279666
ENSBTAG00000025434	614773	ZFP36 ring finger protein like 1 [Source:VGNC Symbol;Acc:VGNC:37163]	ZFP36L1	-1.08225	-1.08227	8.18367	1.95e-06	3.71e-05
ENSBTAG00000026842	529922	zinc finger RANBP2-type containing 3 [Source:VGNC Symbol;Acc:VGNC:37373]	ZRANB3	-1.52121	-1.52182	4.12555	4.34e-09	2.27e-07
ENSBTAG00000000742	538514	angiomotin like 2 [Source:VGNC Symbol;Acc:VGNC:25872]	AMOTL2	1.03732	1.03739	7.11993	4.96e-07	1.14e-05
ENSBTAG00000009836	281070	chromogranin A [Source:VGNC Symbol;Acc:VGNC:27289]	CHGA	3.99396	4.25219	-0.252582	6.74e-06	0.000105991
ENSBTAG00000020046	516565	CXADR like membrane protein [Source:VGNC Symbol;Acc:VGNC:50091]	CLMP	-1.75154	-1.75308	3.02301	2.1e-07	5.44e-06
ENSBTAG00000011682	510255	GLI family zinc finger 2 [Source:VGNC Symbol;Acc:VGNC:29400]	GLI2	-2.24128	-2.26352	-0.272504	1.63e-05	0.00022344
ENSBTAG00000010978	515324	prospero homeobox 1 [Source:VGNC Symbol;Acc:VGNC:33369]	PROX1	3.93716	4.02828	0.853281	1.16e-07	3.38e-06
ENSBTAG00000007216	515409	double PHD fingers 1 [Source:VGNC Symbol;Acc:VGNC:28175]	DPF1	1.49669	1.50187	1.92928	0.00104046	0.00797768
ENSBTAG00000005534	540303	enolase 3 [Source:VGNC Symbol;Acc:VGNC:28498]	ENO3	1.4944	1.49462	6.18146	8.23e-08	2.53e-06
ENSBTAG00000007430	513045	MYB binding protein 1a [Source:VGNC Symbol;Acc:VGNC:31777]	MYBBP1A	1.61308	1.61335	6.3497	3.91e-06	6.75e-05
ENSBTAG00000007799	534254	mitochondrial fission regulator 2 [Source:VGNC Symbol;Acc:VGNC:31728]	MTFR2	1.60388	1.60406	6.66399	6.93e-07	1.52e-05
ENSBTAG00000011274	526006	enolase 2 [Source:VGNC Symbol;Acc:VGNC:28497]	ENO2	1.90119	1.90638	2.44485	2.3e-07	5.88e-06
ENSBTAG00000003920	407997	transglutaminase 1 [Source:VGNC Symbol;Acc:VGNC:35809]	TGM1	1.91315	1.91891	2.41847	4.92e-06	8.12e-05
ENSBTAG00000053812	#N/A	0	0	1.52188	1.5233	3.81835	0.000139723	0.00140013
ENSBTAG00000017500	521931	potassium two pore domain channel subfamily K member 12 [Source:VGNC Symbol;Acc:VGNC:30467]	KCNK12	2.24754	2.27115	0.671621	0.000124967	0.00127699
ENSBTAG00000006606	112442617	refilin B [Source:VGNC Symbol;Acc:VGNC:58403]	RFLNB	1.48579	1.49525	1.08807	0.000425717	0.00367272
ENSBTAG00000024869	517354	C-X3-C motif chemokine ligand 1 [Source:VGNC Symbol;Acc:VGNC:52190]	CX3CL1	-1.39727	-1.39871	2.80926	0.000540928	0.00455211
ENSBTAG00000021609	512637	adhesion G protein-coupled receptor F1 [Source:VGNC Symbol;Acc:VGNC:25661]	ADGRF1	2.70356	2.77474	0.244837	0.000143027	0.0014247
ENSBTAG00000008538	524709	dynein axonemal intermediate chain 1 [Source:VGNC Symbol;Acc:VGNC:28129]	DNAI1	1.88887	1.89717	1.56286	9.52e-05	0.00100822
ENSBTAG00000002065	511317	transcription factor AP-2 gamma [Source:VGNC Symbol;Acc:VGNC:35778]	TFAP2C	7.06678	1.44269e+08	-0.0660761	9.55e-07	2.02e-05
ENSBTAG00000040543	112448061	transmembrane protein 200A [Source:VGNC Symbol;Acc:VGNC:57364]	TMEM200A	-1.34397	-1.34409	6.27913	4.51e-07	1.05e-05
ENSBTAG00000020622	#N/A	collagen type IX alpha 2 chain [Source:VGNC Symbol;Acc:VGNC:27576]	COL9A2	3.48312	3.57192	0.195364	2.25e-06	4.16e-05
ENSBTAG00000006599	517587	inhibin subunit beta E [Source:VGNC Symbol;Acc:VGNC:30203]	INHBE	-2.38005	-2.3819	3.40925	2.38e-09	1.45e-07
ENSBTAG00000055120	525644	oligophrenin 1 [Source:NCBI gene (formerly Entrezgene);Acc:525644]	OPHN1	-2.18291	-2.18849	1.59837	1.68e-07	4.54e-06
ENSBTAG00000030340	788579	intermediate filament family orphan 2 [Source:NCBI gene (formerly Entrezgene);Acc:788579]	IFFO2	1.24323	1.24475	3.24597	0.000278705	0.00252658
ENSBTAG00000000902	532053	O-linked N-acetylglucosamine (GlcNAc) transferase [Source:NCBI gene (formerly Entrezgene);Acc:532053]	OGT	-1.05312	-1.05315	7.91248	1.65e-05	0.000225882
ENSBTAG00000003220	528076	atypical chemokine receptor 1 [Source:VGNC Symbol;Acc:VGNC:58436]	ACKR1	2.27309	2.29807	0.659323	0.000294788	0.00265758
ENSBTAG00000040590	#N/A	0	0	1.49583	1.50108	1.81373	0.00102567	0.0078782
ENSBTAG00000002942	516135	solute carrier family 2 member 10 [Source:VGNC Symbol;Acc:VGNC:34797]	SLC2A10	1.20458	1.2057	3.31173	4.49e-05	0.000529506
ENSBTAG00000014554	504492	snail family transcriptional repressor 1 [Source:VGNC Symbol;Acc:VGNC:35047]	SNAI1	1.6239	1.63381	1.2387	0.000208064	0.00195841
ENSBTAG00000050907	104968464	ribonuclease P/MRP subunit p21 [Source:NCBI gene (formerly Entrezgene);Acc:104968464]	RPP21	2.0856	2.0968	1.60061	7.94e-06	0.000121431
ENSBTAG00000004355	100337359	roundabout guidance receptor 3 [Source:VGNC Symbol;Acc:VGNC:34080]	ROBO3	1.49544	1.49667	4.03364	0.000853891	0.00676209
ENSBTAG00000046037	282479	solute carrier family 25 member 5 [Source:VGNC Symbol;Acc:VGNC:49966]	SLC25A5	1.06755	1.06761	7.24716	2.96e-08	1.11e-06
ENSBTAG00000004751	537578	spectrin beta, non-erythrocytic 4 [Source:VGNC Symbol;Acc:VGNC:35254]	SPTBN4	1.54092	1.54182	4.38647	4.92e-05	0.000572582
ENSBTAG00000032852	#N/A	G protein-coupled receptor associated sorting protein 2 [Source:VGNC Symbol;Acc:VGNC:29605]	GPRASP2	-1.2251	-1.227	2.10781	1.43e-05	0.000198541
ENSBTAG00000010587	614007	SH3 domain binding glutamate rich protein like [Source:VGNC Symbol;Acc:VGNC:34564]	SH3BGRL	-1.19836	-1.19846	6.27065	1.86e-05	0.000248981
ENSBTAG00000044004	617568	shortage in chiasmata 1 [Source:VGNC Symbol;Acc:VGNC:52743]	SHOC1	-4.71502	-4.95	-1.05616	2.76e-06	4.97e-05
ENSBTAG00000001952	520936	prominin 2 [Source:VGNC Symbol;Acc:VGNC:33365]	PROM2	4.60227	4.86592	0.0683951	1.24e-05	0.00017555
ENSBTAG00000050644	#N/A	0	0	-1.60256	-1.61913	-0.467082	0.000963219	0.00747341
ENSBTAG00000024490	#N/A	0	0	1.85854	1.87001	1.05977	9.3e-05	0.000988934
ENSBTAG00000015441	281595	actin gamma 2, smooth muscle [Source:VGNC Symbol;Acc:VGNC:59201]	ACTG2	1.41404	1.41711	2.21977	0.00354928	0.0230146
ENSBTAG00000010992	510524	cathepsin H [Source:VGNC Symbol;Acc:VGNC:27816]	CTSH	1.27083	1.27163	4.02703	1.42e-07	3.96e-06
ENSBTAG00000016191	512392	zinc finger protein 32 [Source:VGNC Symbol;Acc:VGNC:37247]	ZNF32	-1.26082	-1.26209	2.70611	1.81e-05	0.000242776
ENSBTAG00000018422	507427	receptor interacting serine/threonine kinase 3 [Source:VGNC Symbol;Acc:VGNC:52818]	RIPK3	0.944886	0.952119	0.578205	0.031717	0.147986
ENSBTAG00000005092	785924	receptor tyrosine kinase like orphan receptor 2 [Source:VGNC Symbol;Acc:VGNC:34087]	ROR2	-1.71296	-1.71408	3.50053	5.54e-08	1.84e-06
ENSBTAG00000009769	101906939	retinol-binding protein 1 [Source:NCBI gene (formerly Entrezgene);Acc:101906939]	0	-3.09722	-3.18251	-1.22005	4.98e-05	0.000578297
ENSBTAG00000034182	782966	tubulin alpha-1 chain [Source:NCBI gene (formerly Entrezgene);Acc:782966]	0	0.917765	0.918441	3.72052	0.0056725	0.0339594
ENSBTAG00000043963	784913	FH2 domain containing 1 [Source:VGNC Symbol;Acc:VGNC:28997]	FHDC1	1.34261	1.34388	3.40021	6.4e-06	0.00010269
ENSBTAG00000012729	537718	Cdc42 guanine nucleotide exchange factor 9 [Source:VGNC Symbol;Acc:VGNC:26122]	ARHGEF9	-2.01501	-2.0176	2.55025	1.02e-07	3.04e-06
ENSBTAG00000005999	510595	fibronectin type III and SPRY domain containing 1 [Source:VGNC Symbol;Acc:VGNC:29129]	FSD1	1.98086	1.99405	1.2153	0.000134573	0.00135793
ENSBTAG00000018431	100139508	neuron navigator 2 [Source:VGNC Symbol;Acc:VGNC:31891]	NAV2	1.37835	1.37862	5.69965	0.000264496	0.00241288
ENSBTAG00000014921	280826	interleukin 6 [Source:VGNC Symbol;Acc:VGNC:30166]	IL6	2.07713	2.08409	2.49656	5.72e-05	0.000648164
ENSBTAG00000011473	505964	myosin light chain 9 [Source:VGNC Symbol;Acc:VGNC:57010]	MYL9	1.21768	1.21772	8.15675	0.0014441	0.0105155
ENSBTAG00000052055	614940	serine protease 35 [Source:NCBI gene (formerly Entrezgene);Acc:614940]	PRSS35	-1.37721	-1.37759	4.58755	6.22e-07	1.38e-05
ENSBTAG00000005704	522114	interleukin 1 receptor like 2 [Source:VGNC Symbol;Acc:VGNC:30135]	IL1RL2	1.97084	1.98529	0.893834	2.65e-05	0.000336573
ENSBTAG00000045808	100336471	interleukin 17 receptor E like [Source:VGNC Symbol;Acc:VGNC:56210]	IL17REL	6.57856	1.44269e+08	-0.517808	7.68e-05	0.000834642
ENSBTAG00000032687	505033	cystatin-9-like [Source:NCBI gene (formerly Entrezgene);Acc:505033]	0	-2.46617	-2.47067	2.19106	2.93e-08	1.1e-06
ENSBTAG00000015792	787705	cilia and flagella associated protein 54 [Source:NCBI gene (formerly Entrezgene);Acc:787705]	CFAP54	-2.47719	-2.49684	0.0751226	4.39e-05	0.000519297
ENSBTAG00000014467	524909	GLIS family zinc finger 3 [Source:NCBI gene (formerly Entrezgene);Acc:524909]	0	-1.63092	-1.63658	1.06109	5.65e-06	9.15e-05
ENSBTAG00000006404	513195	centromere protein T [Source:VGNC Symbol;Acc:VGNC:27185]	CENPT	1.11247	1.11253	7.55002	1.24e-05	0.000176173
ENSBTAG00000007394	614872	ribosomal protein L22 like 1 [Source:NCBI gene (formerly Entrezgene);Acc:614872]	RPL22L1	-0.96549	-0.965681	5.08564	0.0025922	0.0175148
ENSBTAG00000006676	507975	fin bud initiation factor homolog [Source:VGNC Symbol;Acc:VGNC:56527]	FIBIN	-1.40571	-1.40583	6.24993	5.55e-08	1.84e-06
ENSBTAG00000009048	514259	EF-hand domain family member D2 [Source:VGNC Symbol;Acc:VGNC:28353]	EFHD2	1.06524	1.06548	5.47216	0.000137986	0.00138593
ENSBTAG00000053383	#N/A	0	0	-3.16422	-3.23326	-0.89339	7.84e-06	0.000120057
ENSBTAG00000012246	512529	anoctamin 2 [Source:VGNC Symbol;Acc:VGNC:25951]	ANO2	1.83322	1.83604	2.91975	0.000122847	0.00125847
ENSBTAG00000009575	518886	TBC1 domain family member 32 [Source:VGNC Symbol;Acc:VGNC:35643]	TBC1D32	-1.20607	-1.2069	3.22905	1.74e-05	0.000235347
ENSBTAG00000053561	617577	megakaryocyte and platelet inhibitory receptor G6b [Source:NCBI gene (formerly Entrezgene);Acc:617577]	0	2.26122	2.27881	1.32401	3.71e-06	6.42e-05
ENSBTAG00000002717	532236	internexin neuronal intermediate filament protein alpha [Source:VGNC Symbol;Acc:VGNC:30191]	INA	1.91443	1.91842	2.58381	1.21e-07	3.52e-06
ENSBTAG00000008893	534290	anoctamin 10 [Source:VGNC Symbol;Acc:VGNC:54405]	ANO10	-1.46596	-1.46666	3.84264	1.61e-09	1.06e-07
ENSBTAG00000017430	614251	pregnancy up-regulated nonubiquitous CaM kinase [Source:VGNC Symbol;Acc:VGNC:33079]	PNCK	1.49352	1.50602	0.620602	0.000597945	0.00497727
ENSBTAG00000013235	509642	tubulointerstitial nephritis antigen like 1 [Source:VGNC Symbol;Acc:VGNC:35875]	TINAGL1	1.35648	1.35668	6.31796	0.000290982	0.00262691
ENSBTAG00000004165	#N/A	citramalyl-CoA lyase [Source:VGNC Symbol;Acc:VGNC:27475]	CLYBL	-2.12165	-2.12296	3.64407	1.63e-08	6.77e-07
ENSBTAG00000006882	505886	IQ motif containing GTPase activating protein 3 [Source:VGNC Symbol;Acc:VGNC:30260]	IQGAP3	0.966879	0.966917	7.92881	0.00130883	0.00968211
ENSBTAG00000001961	514739	microtubule associated protein 1B [Source:VGNC Symbol;Acc:VGNC:31178]	MAP1B	1.13788	1.13792	8.23403	3.73e-05	0.000450068
ENSBTAG00000051503	107133056	EF-hand calcium binding domain 8 [Source:NCBI gene (formerly Entrezgene);Acc:107133056]	EFCAB8	4.30513	4.48448	0.338084	5.5e-06	8.97e-05
ENSBTAG00000015131	510932	solute carrier family 29 member 1 [Source:VGNC Symbol;Acc:VGNC:54237]	SLC29A1	1.44111	1.44121	7.51208	3.58e-06	6.26e-05
ENSBTAG00000050253	540699	transient receptor potential cation channel subfamily M member 3 [Source:NCBI gene (formerly Entrezgene);Acc:540699]	TRPM3	-1.67974	-1.68147	2.73684	2.08e-05	0.000272847
ENSBTAG00000018569	539668	cullin 4B [Source:VGNC Symbol;Acc:VGNC:27833]	CUL4B	-1.09245	-1.09252	6.79813	4.12e-06	6.95e-05
ENSBTAG00000016097	509779	calcium voltage-gated channel subunit alpha1 F [Source:VGNC Symbol;Acc:VGNC:26676]	CACNA1F	4.50359	4.68415	0.64477	3.69e-06	6.4e-05
ENSBTAG00000002144	281605	adrenoceptor beta 2 [Source:VGNC Symbol;Acc:VGNC:25697]	ADRB2	3.87724	3.93843	1.23292	9.2e-08	2.8e-06
ENSBTAG00000004879	618793	forkhead box O4 [Source:VGNC Symbol;Acc:VGNC:29100]	FOXO4	-1.71798	-1.71841	4.91126	2.93e-09	1.69e-07
ENSBTAG00000012050	511233	ORAI calcium release-activated calcium modulator 2 [Source:VGNC Symbol;Acc:VGNC:32444]	ORAI2	1.93502	1.94166	2.04647	1.98e-05	0.000262189
ENSBTAG00000049861	783109	Bos taurus BoWC1.1 (WC1), mRNA. [Source:RefSeq mRNA;Acc:NM_001281899]	WC1	4.12233	4.6019	-0.593305	2.31e-05	0.000299146
ENSBTAG00000001517	506480	keratin 18 [Source:VGNC Symbol;Acc:VGNC:30719]	KRT18	1.46187	1.46219	5.72549	3.99e-05	0.000477394
ENSBTAG00000011634	504700	acid phosphatase 3 [Source:VGNC Symbol;Acc:VGNC:52603]	ACP3	2.20195	2.2408	-0.189819	0.000536119	0.00451456
ENSBTAG00000018152	506295	myeloid associated differentiation marker [Source:NCBI gene (formerly Entrezgene);Acc:506295]	MYADM	0.856505	0.856561	7.21389	0.0206948	0.103176
ENSBTAG00000001228	504370	cell cycle exit and neuronal differentiation 1 [Source:VGNC Symbol;Acc:VGNC:27173]	CEND1	2.42161	2.46556	0.153575	1.94e-05	0.000258405
ENSBTAG00000008350	506632	kelch like family member 21 [Source:VGNC Symbol;Acc:VGNC:30650]	KLHL21	1.32044	1.321	4.75632	3.53e-05	0.000428865
ENSBTAG00000027425	617478	coiled-coil domain containing 190 [Source:VGNC Symbol;Acc:VGNC:26883]	CCDC190	-2.01711	-2.0183	3.6667	1.14e-06	2.35e-05
[truncated: 12,250 more rows]

## Sheet: AFB1 3.6 µM vs CTRL
ENSEMBL	ENTREZID	Gene description	Gene name	logFC	unshrunk.logFC	logCPM	PValue	FDR
[truncated: 13,027 more rows]
