# Supplementary material for: Deepening the Whole Transcriptomics of Bovine Liver Cells Exposed to AFB1: A Spotlight on Toll-like Receptor 2
Source: Toxins (Basel). 2022 Jul 20;14(7):504. doi: 10.3390/toxins14070504 (PMC9323327; doi:10.3390/toxins14070504)
Supplement: Supplementary file 1 [file toxins-14-00504-s001.zip › Table S3.xlsx]

## Sheet: AFB1 0.9 µM vs CTRL
Over-representation analysis. Table reports the over-represented BP terms and KEGG pathways in the list of DEGs resulted from the pair-wise comparison AFB1 0.9 µM vs CTRL. For KEGG pathway: gene ratio corresponds to number of annotated DEGs/number of DEGs possessing a KEGG annotation, bg ratio represents the ratio between the number of annotated genes and the number of genes having a KEGG annotat…
ID	Description	GeneRatio	BgRatio	pvalue	p.adjust	qvalue	geneID
bta04060	Cytokine-cytokine receptor interaction	27/404	106/5015	3.77e-08	1.08e-05	9.12e-06	521554/281254/520341/280840/522636/281867/617439/281860/540517/280826/505716/530430/522114/618677/286849/104968444/281094/281249/784541/513990/538957/517587/280805/517354/615107/516104/507054
bta05144	Malaria	12/404	26/5015	2.17e-07	3.11e-05	2.63e-05	281484/281088/281530/528076/281839/281534/280826/286849/529759/281249/538957/282118
bta04080	Neuroactive ligand-receptor interaction	18/404	69/5015	5.15e-06	0.000491345	0.000415935	281665/514876/540702/317707/512928/281605/281749/280881/613482/281137/282638/538896/515331/286814/532829/280805/790124/529618
bta00830	Retinol metabolism	9/404	25/5015	8.32e-05	0.00594826	0.00503533	518393/282851/282870/614455/507093/504769/281615/286792/751790
bta04610	Complement and coagulation cascades	10/404	36/5015	0.000387834	0.0221841	0.0187793	540702/101904063/281376/280750/538896/281375/515440/100271720/280816/790886
bta04668	TNF signaling pathway	18/404	95/5015	0.000466844	0.0222529	0.0188376	281484/280840/783681/514246/281839/280826/282023/281137/618906/507427/281094/790225/280795/535622/517354/615107/286883/282118
bta04270	Vascular smooth muscle contraction	16/404	82/5015	0.000683075	0.0279085	0.0236252	508734/514876/509779/527631/281749/515610/281595/281137/505964/281918/404108/317655/282573/281878/507041/282004
bta04512	ECM-receptor interaction	12/404	53/5015	0.00080634	0.0288266	0.0244024	281088/281530/281499/281057/282654/511043/529759/107131184/532572/513362/511602/523526
bta04020	Calcium signaling pathway	21/404	129/5015	0.00132593	0.0421351	0.0356683	281665/509779/281605/615813/281749/509486/511233/538896/414346/540682/281160/286814/508394/281769/282479/281789/281878/282301/540771/525931/353113
bta04061	Viral protein interaction with cytokine and cytokine receptor	9/404	36/5015	0.00172605	0.0448773	0.0379896	280826/104968444/281094/281249/784541/513990/517354/615107/516104
bta04976	Bile secretion	9/404	36/5015	0.00172605	0.0448773	0.0379896	282598/282356/533151/516762/535293/540528/282360/286792/751790

## Sheet: AFB1 1.8 µM vs CTRL
Over-representation analysis. Table reports the over-represented BP terms and KEGG pathways in the list of DEGs resulted from the pair-wise comparison AFB1 1.8 µM vs CTRL. For KEGG pathway: gene ratio corresponds to number of annotated DEGs/number of DEGs possessing a KEGG annotation, bg ratio represents the ratio between the number of annotated genes and the number of genes having a KEGG annotat…
ID	Description	GeneRatio	BgRatio	pvalue	p.adjust	qvalue	geneID
bta04080	Neuroactive ligand-receptor interaction	35/918	69/5015	8.15e-10	2.62e-07	2.43e-07	281665/407139/617510/514876/540702/281605/280881/613482/317707/512928/281135/281749/281371/513386/515331/282638/281137/538896/788867/529760/282179/286814/512045/280713/282331/526525/513785/532621/280677/505889/532829/281136/280805/790124/529618
bta04610	Complement and coagulation cascades	21/918	36/5015	9.02e-08	1.45e-05	1.34e-05	522347/540702/101904063/281376/280750/505184/538896/281375/281983/512045/281408/281035/280677/107131209/280678/515440/511581/526766/100271720/280816/790886
bta04060	Cytokine-cytokine receptor interaction	42/918	106/5015	1.74e-07	1.86e-05	1.72e-05	521554/520341/281214/281254/280840/522636/782719/281867/617439/530430/540517/505716/280826/618677/522114/508387/286849/281860/513478/281212/104968444/768081/281249/784541/528492/281094/540595/615037/615030/404101/514803/281144/517354/513990/538957/281672/280805/615107/516104/784268/517587/507054
bta04976	Bile secretion	17/918	36/5015	6.5e-05	0.00521888	0.00484323	282598/100296627/281585/282356/533151/534212/281276/535603/532844/282144/100297538/540528/535293/282360/281067/286792/751790
bta04512	ECM-receptor interaction	21/918	53/5015	0.000216414	0.0124912	0.0115921	281088/281530/281499/281057/511043/529759/282654/281872/107131184/508490/506387/281227/532572/535951/520030/513362/282188/317711/282564/511602/523526
bta05144	Malaria	13/918	26/5015	0.00023348	0.0124912	0.0115921	281484/281088/281530/281534/281839/528076/280826/286849/281249/529759/538957/444863/282118
bta05150	Staphylococcus aureus infection	13/918	27/5015	0.000375634	0.0172255	0.0159856	522347/540702/282227/281839/282493/506480/512045/280677/107131209/280678/515440/511581/280816
bta04061	Viral protein interaction with cytokine and cytokine receptor	15/918	36/5015	0.000923334	0.0370488	0.0343821	281214/782719/280826/508387/513478/281212/104968444/281249/784541/281094/517354/513990/281672/615107/516104
bta05410	Hypertrophic cardiomyopathy	20/918	55/5015	0.00111456	0.0397528	0.0368914	509779/533219/280765/100296004/280826/509486/281137/497015/281544/281872/404122/508490/535277/506387/535951/518117/282564/538957/282608/535881
bta05414	Dilated cardiomyopathy	20/918	56/5015	0.0014418	0.0462817	0.0429504	509779/533219/280765/100125240/100296004/509486/497015/281544/281872/404122/508490/535277/506387/535951/535603/518117/282564/538957/282608/535881

## Sheet: AFB1 3.6 µM vs CTRL
Over-representation analysis. Table reports the over-represented BP terms and KEGG pathways in the list of DEGs resulted from the pair-wise comparison AFB1 3.6 µM vs CTRL. For KEGG pathway: gene ratio corresponds to number of annotated DEGs/number of DEGs possessing a KEGG annotation, bg ratio represents the ratio between the number of annotated genes and the number of genes having a KEGG annotat…
ID	Description	GeneRatio	BgRatio	pvalue	p.adjust	qvalue	geneID	Count
bta04080	Neuroactive ligand-receptor interaction	49/1673	72/5067	9.81898e-10	3.29918e-07	3.06972e-07	512581/281604/280805/281605/781956/532829/505889/281665/280881/529618/281135/782518/515331/529760/281137/286814/281136/618042/613482/788867/532621/512045/617510/281749/282331/527964/280677/281033/282179/281946/540702/281371/526585/280713/538896/281513/281298/616000/518283/512928/526525/317707/790124/282638/513386/407140/407139/514876/509493
bta04060	Cytokine-cytokine receptor interaction	59/1673	106/5067	1.05444e-06	0.000177147	0.000164826	404101/281249/281094/538672/280805/615107/520341/528492/522636/513478/516104/522114/615030/517587/540517/280840/281144/281735/281254/282488/338068/538957/617439/508932/280826/504653/540595/618677/509038/505716/514529/514803/768037/507054/507359/407110/767864/281672/281860/280828/521554/282089/286849/517354/281214/504855/281212/281043/782719/100336481/768081/281867/530430/784268/104968444/513990/7…
bta04610	Complement and coagulation cascades	26/1673	36/5067	1.58276e-06	0.000177269	0.00016494	512581/505574/767827/280750/281408/107131209/518609/280686/515440/511581/100271720/512045/522347/281983/281375/526766/280677/540702/526585/538896/281376/280816/505184/280678/790886/101904063
bta05322	Systemic lupus erythematosus	28/1673	44/5067	2.8722e-05	0.00219938	0.00204641	613304/767827/107131209/515440/282227/511581/338071/512045/359715/526766/280677/524770/286849/617823/326601/519935/614958/280678/538911/280691/518961/527388/527645/528329/530773/617875/617905/282493
bta05144	Malaria	19/1673	26/5067	3.27288e-05	0.00219938	0.00204641	281249/281530/528076/281088/281484/282118/281534/281839/529759/538957/615785/444863/280826/280828/282089/286849/281486/281043/512439
bta04061	Viral protein interaction with cytokine and cytokine receptor	23/1673	36/5067	0.000137452	0.00769733	0.00716199	281249/281094/615107/513478/516104/281735/280826/504653/509038/507359/767864/281672/280828/517354/281214/281212/281043/782719/104968444/513990/784541/782274/508387
bta05150	Staphylococcus aureus infection	18/1673	27/5067	0.000344015	0.0165127	0.0153643	506480/767827/507464/281889/107131209/515440/282227/511581/281839/512045/522347/280677/540702/281486/280816/518283/280678/282493
bta05143	African trypanosomiasis	11/1673	14/5067	0.000619665	0.0238151	0.0221587	281249/282001/281484/282118/536654/281839/282488/280826/510889/526525/512439
bta00590	Arachidonic acid metabolism	18/1673	28/5067	0.000667615	0.0238151	0.0221587	617001/504769/282022/286820/527631/535227/535381/282023/511716/506802/493639/282021/523311/407169/511575/615582/530929/107132327
bta00830	Retinol metabolism	17/1673	26/5067	0.000708781	0.0238151	0.0221587	282870/504769/282851/281615/507093/535075/540868/785567/539047/614455/281482/286792/751790/531699/508082/518393/507988
bta04930	Type II diabetes mellitus	18/1673	29/5067	0.00122079	0.0348482	0.0324246	538996/286865/518795/534125/282081/282359/282411/282307/338437/280817/408017/788926/286877/531391/539579/507041/353113/540412
bta03008	Ribosome biogenesis in eukaryotes	37/1673	73/5067	0.00124458	0.0348482	0.0324246	515057/538548/521240/513405/782674/531274/527607/507369/507155/510315/520891/526343/514336/511723/505082/512136/531149/286811/511306/514945/525619/515362/516289/506152/524743/513591/512692/515001/507132/540168/538915/404165/514870/618429/360191/616675/102216273
bta05146	Amoebiasis	33/1673	64/5067	0.0015498	0.0377299	0.0351059	511043/282001/510205/518752/100124520/286865/281534/536654/282307/520030/532572/538957/281788/538050/282188/523526/511602/280826/281048/526766/529939/506387/524770/280828/282089/281789/317711/510833/100336873/281214/524513/281212/530599
bta04020	Calcium signaling pathway	59/1673	129/5067	0.00157208	0.0377299	0.0351059	533929/515924/282001/281604/540568/615813/100124520/281605/281878/617610/540771/511783/281665/281769/529760/540682/618605/526873/286814/536654/282411/535881/510830/528555/785576/511233/281788/100125240/282478/281749/337925/404193/532713/282122/526379/281768/100336808/286852/509779/511504/414346/535603/519037/534051/281371/526585/508394/353113/281789/538896/286771/518283/525931/513386/407140/61378…
bta04512	ECM-receptor interaction	28/1673	53/5067	0.00216179	0.0464638	0.0432323	511043/282654/281530/536286/281088/281499/513362/107131184/529759/520030/281057/532572/506953/282188/281873/282564/523526/511602/281227/535951/529939/506387/506995/281872/508490/317711/100336873/530599
bta00982	Drug metabolism - cytochrome P450	17/1673	28/5067	0.00235085	0.0464638	0.0432323	506093/504401/281805/493719/788719/281293/539356/327709/615514/615537/615552/286792/751790/531699/785216/518393/281806
bta05204	Chemical carcinogenesis - DNA adducts	17/1673	28/5067	0.00235085	0.0464638	0.0432323	535293/506093/282870/404546/281805/493719/282485/282023/327709/615514/615537/615552/286792/751790/785216/281806/507988
