# Supplementary material for: Deepening the Whole Transcriptomics of Bovine Liver Cells Exposed to AFB1: A Spotlight on Toll-like Receptor 2
Source: Toxins (Basel). 2022 Jul 20;14(7):504. doi: 10.3390/toxins14070504 (PMC9323327; doi:10.3390/toxins14070504)
Supplement: Supplementary file 1 [file toxins-14-00504-s001.zip › Table S4.xlsx]

## Sheet: AFB1 0.9 µM vs CTRL
Gene Set Enrichment Analysis (KEGG pathways). Table report the over-represented KEGG terms in the comparison AFB1 0.9 µM vs CTRL. NES: Normalized Enriched Score.
ID	Description	setSize	enrichmentScore	NES	pvalue	p.adjust	qvalues	rank	core_enrichment
bta05132	Salmonella infection	216	0.524307	1.60938	1.24611e-05	0.00164091	0.00131334	1705	768070/777775/281534/281555/404053/100295973/510767/534206/404122/790225/104968444/281249/507427/782966/280826/505964/280795/618906/513939/784541/281165/512943/326600/616503/514090/539882/613533/516039/518136/535327/280730/528415/539149/282601/540236/404151/282846/101906089/493720/280991/539780/280979/512355/280828/782690/281048/100298939/281020/768036/523424
bta05169	Epstein-Barr virus infection	165	0.556325	1.66974	1.29334e-05	0.00164091	0.00131334	2308	281057/281534/286849/524530/281839/510767/505463/526392/615414/524959/280826/618906/512943/504939/513497/506727/514090/516039/540378/100848815/535327/280730/533526/100125591/282493/517359/522670/493720/280991/616942/617024/525408/512355/521939/534996/538436/101907965/281020/535369/281871/533953/281667/519729/508367/509006/533050/281855/504707/282530
bta04115	p53 signaling pathway	66	0.678251	1.83766	1.45643e-05	0.00164091	0.00131334	1666	281530/524530/510767/505463/615414/104968444/281375/100137737/507901/784541/528453/504939/513497/540378/280730/282152/533526/534217/100296226/514005/509485/617931/509863/538436/508167/515105/281020/616861
bta03008	Ribosome biogenesis in eukaryotes	73	0.641907	1.76297	4.3049e-05	0.00363764	0.00291147	2960	515001/782674/538548/512692/618429/531274/514336/540139/511723/506152/616675/513405/286811/525619/515362/510315/513591/520891/507132/511306/360191/516289/515057/404165/512048/102216273/521240/520351
bta05219	Bladder cancer	37	0.742919	1.83981	6.19301e-05	0.00418647	0.00335074	1822	281530/522921/524530/281308/112441463/525506/281769/513497/540378/510276/617024/280828/100298939/535369/540421
bta04210	Apoptosis	118	0.574439	1.66801	8.14321e-05	0.00458734	0.00367159	2419	777775/404053/510767/505463/404122/104968444/507981/100137737/510524/782966/280795/784541/515200/504939/514090/539882/280730/282152/352958/493720/280991/280979/100296226/512355/507426/538801/404187/112442685/100298939/404144/281020/327694/768036/541268/508367/281855/504707/540944/281879/615013
bta05165	Human papillomavirus infection	259	0.474562	1.47639	0.000109274	0.00527636	0.00422306	2440	281530/538609/511043/783681/613288/524530/538619/615414/539337/516433/281499/282654/508008/532572/281088/282023/511308/541101/508490/281872/529939/540664/493729/516209/513497/514090/506387/540378/280730/282191/533526/505224/518974/535951/493720/280991/616942/506953/520030/408005/510427/767866/100337066/521939/100295316/536128/533782/530599/782690/538436/281793/505267/100298939/535369/281871/52332…
bta05145	Toxoplasmosis	80	0.608129	1.69027	0.000184691	0.00780318	0.00624546	2539	281534/511043/286849/414346/510767/281792/532572/618906/518795/512943/529939/513478/506387/516039/100848815/535327/282152/281276/282089/282493/280991/525408/520030/530599/281020/533953/534069/520167/281855/282530/615013/282490
bta05166	Human T-cell leukemia virus 1 infection	184	0.502626	1.52323	0.000293057	0.0110059	0.00880885	2703	531389/539369/286849/524530/281839/526392/615414/286794/282356/282479/280826/280795/535603/513497/100848815/280730/282152/533526/281033/282089/282493/407125/533251/522670/533039/280991/616942/617024/540313/521939/538436/506740/100298939/535369/615030/783470/513105/616275/528252/504653/281667/508367/509006/534069/533050/281861/281855/282530/100336564/282490/100297981/282480/514420/527124
bta05200	Pathways in cancer	392	0.428319	1.36648	0.000572167	0.0193393	0.0154786	2473	538896/281137/538609/511043/783681/613288/521554/524530/281308/112441463/539767/538619/510767/517405/505463/526392/615414/282356/539337/281160/508008/280826/280795/514749/525506/281749/532572/282023/281769/511308/508490/513723/281872/535603/529939/504939/493729/615037/513497/533125/514090/506387/540388/540378/526585/280730/282191/282152/533526/281806/282089/280894/515924/493720/280991/510276/6170…
bta05224	Breast cancer	110	0.541842	1.56165	0.000712202	0.0206593	0.0165351	1822	538609/783681/613288/524530/538619/517405/505463/526392/539337/281160/508008/280795/511308/504939/493729/513497/514090/353120/280730/280991/617024/408005/519657/767866/100337066/536128/533782/782690/100298939/535369/523325/540421
bta04080	Neuroactive ligand-receptor interaction	72	0.592943	1.62533	0.000733465	0.0206593	0.0165351	1731	281665/538896/281137/317707/514876/280881/613482/282638/515331/540702/512928/281605/281749/286814/282248/282702/513386/407139/788867/407136/281298/281371/526585/529760/281033/617510/540305/781956/505056/618042/509748/512045/526525/616000/319094/280713/281135/509493/104968467
bta01522	Endocrine resistance	78	0.579055	1.6042	0.000797437	0.0207334	0.0165944	1822	783681/522921/524530/517405/280795/618906/535603/512943/513497/540378/535327/280730/280991/617024/618614/767866/536128/281793/100298939/281020/535369/540421
bta05222	Small cell lung cancer	83	0.567862	1.58593	0.000932994	0.0216489	0.0173272	2303	511043/524530/510767/505463/532572/282023/508490/281872/529939/504939/513497/514090/506387/280730/282191/282152/533526/280991/617024/520030/512355/530599/538436/512915/281020/535369/508632/520167/281855/540944/781568
bta05216	Thyroid cancer	31	0.715791	1.71557	0.000960751	0.0216489	0.0173272	1564	524530/505463/504939/513497/514090/280730/515924/782690/100298939
bta04380	Osteoclast differentiation	82	0.564296	1.57324	0.00116187	0.0245445	0.0196447	2227	531389/540819/514246/526392/281094/280795/282227/618906/518795/517192/510008/512943/535327/517002/282089/522670/280991/529346/512355/282081/508367/534069/536097/281855
bta04330	Notch signaling pathway	51	0.630724	1.64554	0.00130668	0.0259799	0.0207936	1720	538609/783681/538619/517405/528508/516209/511478/408005/767866/536128/505267/532767/523325
bta04064	NF-kappa B signaling pathway	71	0.571736	1.5643	0.00214657	0.0403079	0.0322613	2289	286849/281839/505463/526392/100137737/282023/518089/504939/282152/281214/522670/510427/512355/534996/280828/281408/281048/281020/535188/533953/504653/508367/281855/504707/540944
bta05416	Viral myocarditis	39	0.660632	1.65103	0.00231011	0.0410956	0.0328919	2539	286849/524530/281839/510767/404122/100296004/506387/100848815/282493/511845/616942/280979/619066/509006/533050/282530/281439/282490
bta04514	Cell adhesion molecules	68	0.570869	1.55259	0.00258166	0.0427906	0.0342485	2308	526865/529759/286849/281839/516017/281484/100140960/507857/533492/281051/533834/100848815/614645/282493/511318/613842/508656/531178/616942/618198/281063/514998/509006/514031/533050/281486/282530
bta04218	Cellular senescence	149	0.484721	1.44243	0.00268867	0.0427906	0.0342485	2703	524530/539767/505463/615414/510420/281375/282479/280826/618906/512943/504939/616503/513497/516039/540378/513643/535327/533526/282089/520157/280991/616942/617024/540259/540313/521939/280828/538436/100298939/535369/520188/281667/509613/509006/534069/533050/510158/281879/281061/618405/282480/504985/527124
bta04510	Focal adhesion	154	0.481483	1.43639	0.00278519	0.0427906	0.0342485	2761	281530/511043/524530/615414/404122/281499/282654/505964/532572/281088/281165/508490/524770/281872/529939/540664/506387/613533/513432/528415/282191/768226/280894/535951/280991/280979/506953/520030/533378/530599/512431/527550/100298939/281020/503620/619066/281873/508632/783470/539742/522269/528252/506995/514031/520167/282194/615013/504323/539224/282002/511976/514106/505908
bta05212	Pancreatic cancer	73	0.560153	1.53843	0.00295603	0.0434408	0.0347689	2564	524530/505463/514749/513723/504939/533823/513497/514090/540388/280730/282152/282089/280991/617024/535369/619066/540421/534069/281855/615013/618405

## Sheet: AFB1 1.8 µM vs CTRL
Gene Set Enrichment Analysis (KEGG pathways). Table report the over-represented KEGG terms in the comparison AFB1 1.8 µM vs CTRL. NES: Normalized Enriched Score.
ID	Description	setSize	enrichmentScore	NES	pvalue	p.adjust	qvalues	rank	core_enrichment
bta05132	Salmonella infection	216	0.468945	1.68721	1.62119e-05	0.00196198	0.00160698	2238	281534/510767/404053/768070/790225/404122/777775/281555/104968444/281249/100295973/784541/534206/280795/282601/514090/516039/280826/281048/539882/513939/618906/326600/505964/512943/404151/518622/535327/281165/782966/616503/613533/539780/281832/280730/507427/528415/614345/518136/539149/280950/514261/536605/280979/100298939/513751/504707/782690/101906089/282846/281020/280991/493720/282466/280828/51…
bta05169	Epstein-Barr virus infection	165	0.479422	1.67949	1.65802e-05	0.00196198	0.00160698	2508	281057/281534/510767/286849/505463/281839/526392/524959/524530/615414/513497/514090/516039/280826/540378/506727/533526/618906/522670/512891/512943/282493/506182/535327/534996/517359/504939/280730/525408/100125591/101907965/538436/538204/281667/100848815/504707/541218/281020/280991/616942/493720/519729/511077/509006/282015/533953/512355/282488/618405/281871/617024/510029
bta03008	Ribosome biogenesis in eukaryotes	73	0.647971	2.05195	1.7414e-05	0.00196198	0.00160698	2651	782674/510315/515362/506152/515001/538548/531274/507132/616675/512692/515057/525619/286811/520891/360191/511723/514336/540139/513405/538915/404165/511306/521240/507155/768075/618429/513237/526343/524743/102216273/514870/516289/508270/112444653/514945/507410/507369/513591/531149/540772
bta03010	Ribosome	131	0.508711	1.73661	3.37143e-05	0.00237218	0.00194296	3225	510347/534352/532842/399560/614711/538054/509816/534970/506358/504663/508825/286873/783948/505681/614102/540278/512469/514403/112444653/535056/286853/615431/614220/101903478/508216/617901/505981/510899/282877/282847/618702/618609/768042/510957/445421/768327/507154
bta04115	p53 signaling pathway	66	0.618141	1.92647	3.50914e-05	0.00237218	0.00194296	2277	281530/510767/505463/104968444/524530/615414/784541/509485/514005/513497/507901/540378/281375/533526/100296226/100137737/532527/528453/282152/616861/504939/280730/538436/509863/281020/534217/281061/508167/538512/282488/618405
bta04064	NF-kappa B signaling pathway	71	0.566644	1.78705	0.000104679	0.00589693	0.00482993	2821	286849/505463/281839/526392/282023/281048/281408/522670/100137737/281214/281212/506182/518089/534996/282152/504939/504707/281020/510427/280828/533953/514386/512355/618405/504653/540944/112446383/535188
bta05145	Toxoplasmosis	80	0.53603	1.71891	0.000156571	0.00755706	0.00618968	2199	281534/510767/414346/286849/511043/281792/516039/532572/281276/618906/513478/512943/520030/282493/506387/535327/282152/534069/282089/529939/525408/100848815/518795/281020/280991/530599/533953/514386
bta03050	Proteasome	44	0.630981	1.84129	0.000178865	0.00755706	0.00618968	4108	512891/510593/101907965/538204/528142/510069/519729/282015/515503/510029/505050/516919/100336105/539141/512456/538625/535683/510155/534640/510314/767981/506238/511207/518637
bta04932	Non-alcoholic fatty liver disease	134	0.453495	1.55248	0.000386867	0.0137394	0.0112534	3182	510767/280795/327694/280826/618906/512943/535327/282089/327690/280730/616871/282393/539579/287014/282289/326346/287327/512500/327660/327714/280991/327670/112442685/280828/338079/536561/512355/338084/282488/338065/281091/327665/287027/282290/281480/327688/507359/282081/281742/526279/286885/507176/616109/281570/327691/539361/327702/327710/287020
bta04110	Cell cycle	121	0.467335	1.58144	0.00040649	0.0137394	0.0112534	3365	505463/524530/615414/513497/507731/540378/515476/533526/515301/528453/534069/282089/504939/512915/538436/281667/524925/615512/281061/527124/506605/511077/520188/618405/614342/506740/535565/617024/525428/282126/515462/521939/535369/510916/511754/510120/281668/506970/616275/534712/522613
bta04210	Apoptosis	118	0.460659	1.55361	0.000595491	0.0182978	0.014987	2741	510767/404053/505463/507981/404122/777775/510524/104968444/784541/352958/280795/514090/327694/539882/515200/100296226/100137737/538801/782966/282152/504939/280730/280979/100298939/504707/281020/280991/493720/404187/112442685/768036/514386/512355/538409/282488/618405/507426/540944/404144/526279/281662/414925
bta00310	Lysine degradation	57	-0.537353	-1.6905	0.000803029	0.0208451	0.0170734	2090	514062/535630/519777/506310/767828/540563/514102/530270/789336/508629/519857/513967/100138100/537539/537241/533087/532209/520865/786620/616050
bta04080	Neuroactive ligand-receptor interaction	72	0.521536	1.64811	0.000819358	0.0208451	0.0170734	2050	281665/280881/281137/538896/613482/317707/515331/514876/281605/282638/540702/282179/529760/512928/509493/281749/286814/617510/513386/407139/281135/526525/281371/282331/618042/788867/280713/512045/281298/281033/526585/407136/782518/540305/282702/781956/282248/319094/104968467/282088/616000
bta04657	IL-17 signaling pathway	61	0.542338	1.67003	0.000863406	0.0208451	0.0170734	2658	531389/540819/281308/112441463/282023/280795/280826/618906/517192/512943/281214/281212/506182/535327/281043/281832/783335/504707/493720/280828/512355/781568/338319/538094
bta05016	Huntington disease	260	0.382621	1.39984	0.00106668	0.0231178	0.0189348	3182	617701/510767/414346/404053/768070/534479/282479/777775/281555/100295973/789044/100847550/534206/524709/539882/282312/518030/512891/782966/282478/281698/327690/280730/617375/101907965/616871/518136/539149/282393/514261/538204/287014/513751/282289/326346/534232/287327/338053/512500/510069/327660/327714/327670/529053/112442685/511273/519729/781037/338079/282015/768036/515503/512355/338084/338065/78…
bta05323	Rheumatoid arthritis	52	0.563133	1.69145	0.00111682	0.0231178	0.0189348	2428	281534/281839/281308/112441463/281249/280795/281094/280826/518974/515200/281214/281212/282493/534069/282089/281043/505224/100848815/503620/280828/517002/282405
bta03020	RNA polymerase	32	0.645401	1.77114	0.00116273	0.0231178	0.0189348	2916	282312/767843/618296/511587/516337/617375/100140537/534232/512375/614776/617937/282342/508049/535288/613778/504452
bta05222	Small cell lung cancer	83	0.490846	1.58235	0.00147311	0.0276618	0.0226566	2543	510767/505463/511043/524530/282023/281872/513497/514090/532572/508490/533526/520030/506182/506387/282152/504939/280730/529939/512915/538436/541218/281020/527124/280991/282191/530599/511077/514386/615827/512355/618405/617024/540944/781568
bta03013	Nucleocytoplasmic transport	100	0.465374	1.5372	0.00163208	0.0290338	0.0237804	3949	515233/515127/510372/529231/540111/518622/100139154/520924/616055/505417/101907835/537706/513080/541013/511248/518768/504589/540982/506509/614879/513592/614694/112446383/512530/513270/506738/540457/506836/787259/520174/509871/513707/504716/100125940/100139879/510250/510540/533001/532933/100138517/513043/616114
bta05166	Human T-cell leukemia virus 1 infection	184	0.402366	1.42542	0.00179483	0.0298838	0.0244766	3040	531389/539369/286849/281839/526392/282479/540313/524530/615414/286794/282356/280795/513497/280826/407125/533526/535603/522670/615030/282493/533251/282152/282478/534069/100297981/282089/281033/280730/538436/281667/533039/100848815/100298939/281861/527124/280991/616942/281156/511077/509006/614342/506740/783470/535565/617024/504653/282120/282530/528252/521939/514420/535369/407173/540457/513105
bta05022	Pathways of neurodegeneration - multiple diseases	386	0.349381	1.31814	0.00188558	0.0298838	0.0244766	2768	528842/617701/510767/414346/541161/404053/768070/534479/282479/777775/613288/281555/100295973/789044/539337/100847550/509779/282023/534206/532626/281094/511308/514090/327694/516039/280826/524709/539882/615408/508008/540421/510219/618906/281348/493729/539754/512891/512943/535327/782966/282152/282478/100337066/281370/327690/280730/101907965/616871/518136/539149/282393/514261/538204/768234/100298939…
bta05014	Amyotrophic lateral sclerosis	312	0.362732	1.34689	0.0019451	0.0298838	0.0244766	3182	528842/510767/404053/768070/534479/404122/777775/281555/100295973/789044/100847550/534206/327694/516039/524709/539882/510219/618906/281348/540111/281361/512891/512943/535327/782966/282152/520924/327690/280730/101907965/616871/518136/539149/282393/514261/538204/280979/506309/287014/513751/282289/326346/287327/338053/512500/537706/510069/513080/327660/281020/327714/327670/529053/112442685/511273/51…
bta03040	Spliceosome	125	0.434675	1.47674	0.00207532	0.0304982	0.0249798	3743	512584/529231/613304/531493/614759/505417/509920/574400/537706/617823/535457/507944/541013/107131494/509905/613634/615704/520046/514932/614553/789082/513868/615240/508788/790677/522621/520500/507895/509802/528991/533700/507180/615136
bta00053	Ascorbate and aldarate metabolism	10	-0.848835	-1.80494	0.00235814	0.0332027	0.027195	1463	508629/513967/537539/280910/286792/751790
bta05012	Parkinson disease	236	0.380256	1.37947	0.00245582	0.0332027	0.027195	3182	510767/414346/515437/404053/768070/282479/777775/281555/100295973/534206/532626/327694/539882/615408/539754/512891/782966/282152/282478/281370/327690/280730/101907965/616871/518136/539149/280950/282393/514261/538204/287014/282289/326346/287327/338053/512500/510069/327660/505294/327714/281793/327670/514472/112442685/511273/519729/338079/281557/524456/282015/768036/515503/338084/338065/281091/32766…
bta05020	Prion disease	227	0.380489	1.37553	0.00293265	0.0381244	0.0312261	3182	510767/414346/404053/768070/282479/777775/281555/100295973/509779/534206/327694/280826/407125/539882/532572/618906/512891/512943/535327/782966/512045/282478/327690/280730/101907965/767866/616871/518136/539149/282393/514261/538204/287014/282289/326346/287327/338053/512500/510069/327660/327714/617109/327670/511273/519729/616000/338079/282015/768036/515503/338084/338065/281091/327665/287027/282290/2…
bta05417	Lipid and atherosclerosis	157	0.406938	1.41788	0.00330132	0.0408071	0.0334234	2272	281534/510767/286849/281484/281839/281308/112441463/104968444/282870/281249/784541/280795/327694/516039/280826/281048/281276/618906/512943/281214/281212/506182/535327/534996/282152/281043/281832/280730/100125591/536558/100298939/282846/281020/280991/510427/112442685/280828/533953/512355/538409/281486/282488
bta04218	Cellular senescence	149	0.410455	1.4219	0.00338047	0.0408071	0.0334234	3158	505463/282479/539767/540313/524530/615414/513497/516039/280826/510420/540378/281375/533526/618906/512943/535327/616503/282478/534069/282089/504939/538436/281667/100298939/281061/527124/280991/616942/513643/280828/511077/509006/520188/618405/540259/617024/525428/282120/509613/281662/520157/282261/510158/281420/521939/535369/407173/511754/533050

## Sheet: AFB1 3.6 µM vs CTRL
Gene Set Enrichment Analysis (KEGG pathways). Table report the over-represented KEGG terms in the comparison AFB1 3.6 µM vs CTRL. NES: Normalized Enriched Score.
ID	Description	setSize	enrichmentScore	NES	pvalue	p.adjust	qvalues	rank	core_enrichment
bta03008	Ribosome biogenesis in eukaryotes	73	0.626482	2.31636	1.71209e-05	0.00578688	0.00461364	2801	510315/782674/506152/515001/515362/512692/525619/286811/507132/360191/538548/531274/513405/514336/515057/524743/511723/616675/520891/404165/516289/538915/511306/507155/512136/507369/618429/514945/521240/527607/102216273/505082/526343/514870/513591/531149/507410/614984/540772/768075/112444653/508270/513237/512048/617204
bta05169	Epstein-Barr virus infection	165	0.403911	1.67065	6.48656e-05	0.00774009	0.00617086	3449	281057/281534/281839/286849/510767/524959/526392/505463/522670/512891/280826/516039/615414/524530/506727/513497/506182/514090/512943/535327/618906/511077/540378/100125591/525408/282488/280730/282493/517359/533953/509006/493720/533526/519729/282015/510029/616942/280991/538204/512355/616115/521939/100848815/504707/618405/541218/538436/535369/509855/508233/101907965/281871/618508/282530/506238/50810…
bta04064	NF-kappa B signaling pathway	71	0.526011	1.93542	6.8699e-05	0.00774009	0.00617086	3449	281839/282023/286849/526392/505463/522670/281212/281408/281214/506182/280828/281048/100137737/533953/514386/504653/282152/510427/514735/512355/616115/518089/540944/504707/618405/510923/613667/508233/535188/508105/534996/508367/504939/281855/281020
bta05132	Salmonella infection	216	0.36893	1.57134	0.000158456	0.0099271	0.00791448	3188	281534/510767/768070/790225/104968444/784541/777775/280795/281555/280826/516039/100295973/534206/513939/514090/404122/404053/512943/280828/326600/535327/281048/618906/511077/538050/518136/535127/528415/280730/281165/281249/282601/101906089/511273/533953/404151/536605/505964/493720/616503/613533/768036/514386/539780/518622/281557/513751/281832/539149/782966/282846/280991/100298939/512355/616115/53…
bta03020	RNA polymerase	32	0.631178	1.99387	0.000161033	0.0099271	0.00791448	3678	282312/516337/511587/767843/508049/504452/618296/100140537/282342/617937/617375/535288/534232/512375/540308/614776/613778/512971/540428/617422/536316
bta03050	Proteasome	44	0.577207	1.94938	0.000176221	0.0099271	0.00791448	3929	512891/510593/519729/282015/510029/538204/510069/100336105/101907965/506238/505050/512456/515503/538625/516919/282328/528142/504937/282016/767981
bta05323	Rheumatoid arthritis	52	0.523577	1.82421	0.000331727	0.014575	0.0116201	2823	281308/281534/281839/112441463/280795/280826/281212/282089/281214/281094/280828/518974/281043/505224/281249/282493/281735/515200/517002/100848815/503620/281108/613667/282405/282530
bta04115	p53 signaling pathway	66	0.486868	1.77013	0.00034497	0.014575	0.0116201	1534	281530/510767/505463/104968444/784541/615414/514005/507901/100296226/524530/513497/509485/100137737/616861/540378/281375/532527/282488/280730/282261/528453/533526/509863/538512/282152
bta00982	Drug metabolism - cytochrome P450	28	-0.619873	-1.96583	0.000407028	0.0152862	0.012187	2703	507346/517724/505515/615507/533917/508879/783879/785216/281805/531699/788719/615552/327709/615514/615537/506093/539356/281293/286792/493719/504401/751790
bta03013	Nucleocytoplasmic transport	100	0.42294	1.64162	0.000485502	0.01641	0.013083	4098	510372/515233/540111/515127/100139154/540982/616055/512136/518768/529231/520924/513080/504589/506836/518622/505417/533001/532933/537706/506738/511248/614694/614879/510540/531602/513270/787259/504307/512530/101907835/506509/523399/513707/100125940/529929/509871/513592/515804/506561/112446383/504823/784219/100138517
bta04657	IL-17 signaling pathway	61	0.492064	1.76499	0.000554381	0.0170346	0.013581	2943	281308/282023/531389/540819/112441463/280795/280826/281212/281214/506182/512943/280828/535327/618906/281043/493720/281735/281832/504855/781568/512355/616115/783335/504707/613667/338319/508233/508105/517192
bta05014	Amyotrophic lateral sclerosis	312	0.319769	1.41087	0.000991171	0.027918	0.0222579	3468	510767/528842/768070/534479/100847550/512891/777775/281555/516039/789044/100295973/534206/510219/327694/281361/404122/540111/404053/512943/535327/618906/540982/281348/518136/112442685/282393/524709/512136/518768/287327/280730/520924/511273/513080/327660/519729/768036/538903/512500/282152/281480/506836/282015/287014/326346/510029/513751/539149/282289/782966/777788/506309/338053/538204/338079/51006…
bta05016	Huntington disease	260	0.330483	1.43304	0.00124568	0.0317136	0.0252839	3944	282312/282479/414346/510767/617701/768070/534479/100847550/512891/777775/281555/789044/100295973/534206/404053/518136/518030/282478/112442685/504452/282393/524709/287327/280730/511273/781037/327660/519729/768036/281698/512500/281480/617375/282015/287014/326346/510029/513751/539149/282289/534232/782966/788566/338053/538204/338079/510069/512355/513049/338084/338065/287027/514261/281091/614776/32769…
bta03010	Ribosome	131	0.384417	1.54716	0.00141582	0.0317136	0.0252839	3083	510347/534352/532842/399560/534970/512469/614102/509816/514403/538054/505681/282847/507154/535056/506358/508825/286873/504663/508216/505981/112444653/614711/783948/286853/768327/282877/618609/540278/618702/768042/101906221/533892
bta00280	Valine, leucine and isoleucine degradation	43	-0.498524	-1.73842	0.00157324	0.0317136	0.0252839	2494	508629/508170/407767/535883/505968/509209/511082/280969/512002/532785/515902/531699/513967/280759/537539/282150/513504/504301/280871/327692/614302
bta04210	Apoptosis	118	0.391271	1.55284	0.00172746	0.0317136	0.0252839	3534	352958/510767/505463/104968444/507981/510524/784541/777775/280795/100296226/327694/514090/404122/404053/100137737/538801/112442685/282488/280730/404187/493720/768036/514386/282152/515200/782966/507426/777788/280991/100298939/512355/616115/504336/540944/504707/618405/281108/508233/539882/404144/526279/538409/281350/541268/508367/504939/281855/100138102/615013/281020/510434
bta05222	Small cell lung cancer	83	0.426788	1.61116	0.00174911	0.0317136	0.0252839	3449	282023/510767/511043/281872/505463/508490/524530/513497/506182/514090/512915/530599/511077/280730/532572/533526/527124/514386/282152/529939/520030/506387/280991/781568/512355/616115/520167/540944/618405/541218/538436/535369/508233/282191/615827/281875/504939/281855/281020
bta04932	Non-alcoholic fatty liver disease	134	0.377371	1.52337	0.00177561	0.0317136	0.0252839	3810	510767/280795/280826/327694/282089/512943/280828/535327/618906/112442685/282393/282488/287327/280730/539579/327660/536561/282081/507359/512500/281480/287014/326346/282289/777788/280991/338079/512355/616115/507176/338084/338065/287027/281091/327690/508233/616871/539361/616109/327670/282290/286885/526279/327714/281090/338064/327688/327691/327710/327665/327717/281570/338063/281742
bta05034	Alcoholism	95	-0.390742	-1.56895	0.0018487	0.0317136	0.0252839	3484	613524/520277/504242/506322/281713/537167/509827/100297344/525962/613618/534129/785086/509084/529566/540666/538829/536051/513602/512741/326597/282323/100297725/100125276/280691/518961/527388/527645/528329/530773/617875/617905/100138040/537682/286850/538911/517559/509107/326601/519935/531391/614958/524734/511812/281293/618399
bta01230	Biosynthesis of amino acids	58	0.470089	1.67119	0.00194647	0.0317136	0.0252839	3292	526006/540303/404148/539159/281141/537688/613376/518752/327669/281543/539579/508683/280976/512771/509566/280869/280726/281181/512571/768058/282446/507119/509002/539188/512526/507443/507476/286886/281206
bta04080	Neuroactive ligand-receptor interaction	72	0.44177	1.62969	0.00200535	0.0317136	0.0252839	3388	280881/281137/281665/282179/515331/529760/538896/540702/613482/281605/317707/514876/282638/509493/286814/618042/526525/280713/281135/512928/617510/513386/407139/512581/788867/281749/281371/282331/616000/782518/281298/281033/781956/526585/281604/512045/540305/338035/280839/407136/282088/505056/509748/104968467/282702/537698/319094/282248
bta05012	Parkinson disease	236	0.331133	1.42299	0.00215206	0.0317136	0.0252839	3810	282479/414346/510767/515437/768070/512891/777775/281555/100295973/534206/615408/327694/532626/404053/518136/282478/514472/112442685/282393/539754/100124520/287327/280730/511273/511782/327660/281370/505294/519729/768036/506103/512500/282152/281480/282015/287014/524456/326346/281557/510029/539149/282289/782966/777788/338053/538204/338079/510069/338084/504336/281793/338065/287027/514261/281091/28095…
bta04720	Long-term potentiation	46	-0.479708	-1.69672	0.00215802	0.0317136	0.0252839	2516	520277/506322/505453/282321/100297344/538829/536051/317697/790867/326597/530719/282323/282001/536654/509107/531391/286852/517953/281878/526227/529618/532713
bta05022	Pathways of neurodegeneration - multiple diseases	386	0.299655	1.34552	0.00239138	0.0326288	0.0260136	3826	282023/282479/414346/510767/528842/540421/541161/617701/768070/534479/100847550/512891/509779/777775/281555/280826/516039/789044/613288/100295973/534206/510219/615408/327694/532626/514090/281094/511308/404053/512943/493729/535327/618906/539337/768234/281348/518136/282478/514472/112442685/282393/524709/539754/508008/282488/287327/280730/540568/282173/100337066/511273/781037/327660/493720/281370/51…
bta00240	Pyrimidine metabolism	45	0.499937	1.69515	0.00241337	0.0326288	0.0260136	2155	404189/533096/504261/511858/614103/504652/616377/515029/541028/615447/532399/506131/533873/784304/506946/509282/534181/509965/508458
bta00920	Sulfur metabolism	10	-0.783928	-1.88839	0.00306688	0.0371072	0.0295841	2069	507313/536409/280946/510154/504439/509837
bta00640	Propanoate metabolism	29	-0.549691	-1.75884	0.00309479	0.0371072	0.0295841	3246	512341/510065/508170/515338/281590/282873/535883/280969/536284/515902/537713/280759/506459/282150/280871/327692/614302
bta04623	Cytosolic DNA-sensing pathway	41	0.506047	1.68547	0.00330371	0.0371072	0.0295841	3446	280826/516337/767843/508049/100125591/525408/618296/282099/281249/100140537/617375/534232/282846/616115/540308/507427/614776/508233/618508/613778/512971/281855/782472
bta04668	TNF signaling pathway	95	0.399598	1.53966	0.00338196	0.0371072	0.0295841	2895	280840/281137/281484/281839/282023/514246/783681/790225/280795/280826/516039/281212/282122/281214/506182/281094/512943/535327/618906/789216/281043/282488/493720/282081/514386/281735/508608/280991/516353/512355/616115/507427/540944/504707/613667/338319/508233/523746/508105/526279
bta05144	Malaria	26	0.579766	1.74888	0.0033944	0.0371072	0.0295841	1310	281484/281530/281534/281839/286849/529759/281088/280826/282089/280828/281043/528076/512439/281249/281486
bta00980	Metabolism of xenobiotics by cytochrome P450	31	-0.532035	-1.72824	0.00345966	0.0371072	0.0295841	2703	507346/517724/505515/615507/533917/508879/783879/785216/404546/281805/615552/327709/615514/615537/506093/286792/493719/535293/751790
bta03040	Spliceosome	125	0.373004	1.4925	0.00351311	0.0371072	0.0295841	4195	512584/613304/520046/529231/513868/617823/614553/615704/535457/505417/789082/509920/574400/506405/531493/537706/507944/514932/614759/540258/528991/509905/520500/507895/533700/508735/509802/525110/504381/506123/508788/514003/509425/613634/534228/513577/510529/522621/541013
bta04713	Circadian entrainment	52	-0.446921	-1.61873	0.00421289	0.0426238	0.0339822	3105	100297344/525962/509936/282412/281603/317697/326597/530719/282323/281216/282001/100125276/282411/286850/536654/531391/511812/504408/282004/529618/532713/618399
bta04310	Wnt signaling pathway	124	-0.348878	-1.45406	0.0042876	0.0426238	0.0339822	3220	505453/614312/780968/282321/338049/524255/538507/535441/526572/533595/785423/511224/282069/790867/520544/530719/282323/511619/281730/282001/534450/281170/508893/540481/534125/505423/537330/540179/445419/282068/530147/513742/515303/286852/789600/534072/281386/537192/511675/515972/785924/510821/529698/532713/538627/618586/783965
