# Supplementary material for: Deepening the Whole Transcriptomics of Bovine Liver Cells Exposed to AFB1: A Spotlight on Toll-like Receptor 2
Source: Toxins (Basel). 2022 Jul 20;14(7):504. doi: 10.3390/toxins14070504 (PMC9323327; doi:10.3390/toxins14070504)
Supplement: Supplementary file 1 [file toxins-14-00504-s001.zip › Table S5.xlsx]

## Sheet: Foglio1
Log fold change (logFC) for each gene of interest. AFB1 vs CTRL.
Gene name	logFC AF0.9 vs CTRL	logFC AF1.8 vs CTRL	logFC AF3.6 vs CTRL
PTGS2/COX2	1.6	2.72	4.97
IL6	1.67	2.08	3.27
CD40	1.4	1.87	2.48
CD44	1.55	1.92	2.2
TL2	1.72	2.64	3.42
FOS	0.99	1.27	1.67
MAPK11/p38β	1.39	1.55	2.27
CFH	-3.22	-4.49	-6.37
CXCL9	-1.05	-1.47	-2.69
CXCL10	-1.47	-1.78	-3.35
CXCL11	-1.64	-1.94	-3.46
IL33	-2.84	-3.84	-6.28
CYP1A1	1.22	2.28	2.51
CYP2B6	-1.51	-2.36	-4.88
ALDH1A1	-2	-2.51	-3.31
UGT1A1	-4.06	-6.07	-6.73
MSGT1	-1.22	-1.78	-2.62
FMO2	-3.17	-5.07	-7.71
LAMC2	1.3	1.43	1.89
THBS1	2.21	3.15	3.93
COMP	2.8	4	5.38
EDN1	1.43	1.82	1.9
SPP1	1.91	2.82	3.74
NTS	1.94	3.41	4.68
COL4A5	-1.06	-1.68	-2.43
COL4A6	-1.79	-2.83	-3.86
TNXB	1.55	1.39	1.12
ITPR2	-1.31	-2.15	-3.29
CACNA1E	-1.98	-2.53	-3.21
TNFRSF10A	0.94	1.34	1.72
TNFRSF10B	1.15	1.56	1.92
GADD45A	1.03	1.41	1.49
CIDEB	1.74	2.31	2.43
TNFRSF10D	0.48	0.79	1.09
BCL2L1	0.73	0.82	0.9
